# Supplementary material
Source: HighWire-hosted journal article supplement (doi:10.1101/rna.051474.115)
Supplement: SuppLegends.docx [file SuppLegends.docx]

**Fig. S1: A.** Dot blot analysis using an anti-m6A antibody to probe RNA oligos without (left column) or with (right column) m6A. **B.** Comparable dot blot analysis designed to probe mixed A and m6A RNA oligos (left column). Right column: m6A standards.

**Fig. S2:** Sequence motifs identified within 206 SPs.

**Table S1. Detailed information relevant to pilot Agilent two-color tiling microarray.** Included are 1) genomic locations or accession numbers of cDNAs used as templates for in vitro transcription of8 RNAs, 2) tiling DNA probes at 5 nt intervals complementary to RNA in GEO format, and 3) samples used for hybridization.

**Table S2.** **Details relevant to significant probes (SPs).** Listedrecords include 206 SPs and adjacent probes belonging to the same peak determined by meRIP-seq, based on previous publication(s)([Wang et al. 2014b](#_ENREF_29)). Columns A-H: information relevant to corresponding genes and probes; columns I-Q: normalized log2 Cy5/Cy3 ratios for M14/Scr, DZA/Scr, and M14/M14, each with 3 replicates; columns R and S: false discovery rate (FDR) for M14/Scr and DZA/Scr based on the Peak-call method (see **Methods**); columns T-W: statistical scores as *p*-values and running sum scores from the Sample-test method (see **Methods**); column X: final predictions of Significant Probes (double star) based on results from columns R-W.

**Table S3.** **Information related to genes overlapped by 206 SPs.** In total, 206 probes were located in genic regions of 64 annotated protein-coding genes and in 2 Intergenic regions. Columns F and G indicate the number of probes located in that gene and the average distance between adjacent probes, where 0 indicates that two probes overlap. Other columns are self-explanatory.
