# Supplementary material
Source: HighWire-hosted journal article supplement (doi:10.1101/rna.051474.115)
Supplement: TableS1.xlsx [file TableS1.xlsx]

## Sheet: template
RNA Number	length (nt)	Chr Number	Strand	location
1	689	5	-	chr5:98185296-98185984
2	361	11	+	Chr11:7213434-7213923
3	640	12	+	chr12:109539396-109540035
4	480	12	+	chr12:109541876-109542355
5	480	12	+	chr12:109568596-109569075
6	560	12	+	chr12:109572356-109572915
7	250	5	+	NM_007393.3:988-739
8	1788	14	-	NM_019721.2:141-1880

## Sheet: RNA Probes
^Platform=Agilent-062087
!Platform_title = Agilent-062087 Sanford_Burnum_Pilot
!Platform_technology = in situ oligonucleotide
!Platform_distribution = commercial
!Platform_organism = Mus musculus
!Platform_manufacturer = Agilent Technologies
!Platform_manufacture_protocol = see manufacturer's web site at http://www.agilent.com/
!Platform_description =
!Platform_description =
!Platform_description =
!Platform_description = Arrays of this design have barcodes that begin with 16062087 or 2562087.
!Platform_description =
!Platform_description = Orientation:
!Platform_description = Features are numbered numbered Left-to-Right, Top-to-Bottom as scanned by an Agilent scanner (barcode on the left, DNA on the back surface, scanned through the glass), matching the FeatureNum output from Agilent's Feature Extraction software.
!Platform_description =
!Platform_description = The ID column represents the Agilent Feature Extraction feature number.
!Platform_description =
!Platform_description = Rows and columns are numbered as scanned by an Axon Scanner (barcode on the bottom, DNA on the front surface).
!Platform_description =
!Platform_description = To match data scanned on an Axon scanner, use the RefNumber column contained in the Agilent-provided GAL file as the ID_REF column in sample submissions.
!Platform_description =
#ID = Agilent feature number
#COL = Column
#ROW = Row
#NAME = NAME
#SPOT_ID = Spot identifier
#CONTROL_TYPE = Control type
#REFSEQ = RefSeqAccession
#GB_ACC = GenBankAccession
#LOCUSLINK_ID = LocuslinkID
#GENE_SYMBOL = Gene Symbol
#GENE_NAME = Gene Name
#UNIGENE_ID = UnigeneID
#ENSEMBL_ID = EnsemblID
#TIGR_ID = TIGRID
#ACCESSION_STRING = Accession String
#CHROMOSOMAL_LOCATION = Chromosomal Location
#CYTOBAND = Cytoband
#DESCRIPTION = Description
#GO_ID = GoIDs
#SEQUENCE = Sequence
!Platform_table_begin
ID	COL	ROW	NAME	SPOT_ID	CONTROL_TYPE	REFSEQ	GB_ACC	LOCUSLINK_ID	GENE_SYMBOL	GENE_NAME	UNIGENE_ID	ENSEMBL_ID	TIGR_ID	ACCESSION_STRING	CHROMOSOMAL_LOCATION	CYTOBAND	DESCRIPTION	GO_ID	SEQUENCE
1	96	164	GE_BrightCorner	GE_BrightCorner	pos
2	96	162	DarkCorner	DarkCorner	pos
3	96	160	DarkCorner	DarkCorner	pos
4	96	158	CUST_272_PI429446423	CUST_272_PI429446423	FALSE									Mettl3	unmapped				AATTGGGCAGAGAATGTCTGAACCT
5	96	156	CUST_106_PI429446426	CUST_106_PI429446426	FALSE									12Gtl2#1copy	unmapped				TGGACTCACAGTTGCCACCCACCTG
6	96	154	CUST_84_PI429446428	CUST_84_PI429446428	FALSE									13Gtl2#2copy	unmapped				TTCATTTACCTATGGGGAAATGTTA
7	96	152	CUST_95_PI429446417	CUST_95_PI429446417	FALSE									#3	unmapped				GAACCGCCTCTTGCCTTTGCAGCCG
8	96	150	CUST_36_PI429446417	CUST_36_PI429446417	FALSE									#3	unmapped				GGTCCTCGGCCGTGCCCCCTGCGCC
9	96	148	CUST_135_PI429446423	CUST_135_PI429446423	FALSE									Mettl3	unmapped				GCTAAGAAGTCAAGGAAGCACGCTG
10	96	146	CUST_88_PI429446433	CUST_88_PI429446433	FALSE									15Gtl2#6copy	unmapped				CTGCCAAGAGCACCATCTTCAAGAC
11	96	144	A_51_P396883	A_51_P396883	FALSE	NM_010252	NM_010252	14405	Gabrg1	gamma-aminobutyric acid (GABA) A receptor, subunit gamma 1	Mm.255292	ENSMUST00000031119		ref|NM_010252|ens|ENSMUST00000031119|gb|AK049956|gb|AK162884	chr5:71143240-71143181	mm|5qC3.1	Mus musculus gamma-aminobutyric acid (GABA) A receptor, subunit gamma 1 (Gabrg1), mRNA [NM_010252]	GO:0004890(GABA-A receptor activity)|GO:0005216(ion channel activity)|GO:0005230(extracellular ligand-gated ion channel activity)|GO:0005254(chloride channel activity)|GO:0005886(plasma membrane)|GO:0006810(transport)|GO:0006811(ion transport)|GO:0006821(chloride transport)|GO:0007214(gamma-aminobutyric acid signaling pathway)|GO:0007268(synaptic transmission)|GO:0016020(membrane)|GO:0016021(inte…	CTTGCTCATTGTTAAAGGTGTTAGGGAGTTTAGAGGTTTTCAATTGTATCTAAGCATGCC
12	96	142	CUST_180_PI429446423	CUST_180_PI429446423	FALSE									Mettl3	unmapped				ATGAAAGCCAGTGACGCTGACCGGC
13	96	140	CUST_88_PI429446430	CUST_88_PI429446430	FALSE									14Gtl2#4copy	unmapped				TTCTCTACACCAAATTCTGCTTTGG
14	96	138	CUST_11_PI429446417	CUST_11_PI429446417	FALSE									#3	unmapped				CAGCCGTCCGGGCAGAGAGCCTCCG
15	96	136	CUST_50_PI429446430	CUST_50_PI429446430	FALSE									14Gtl2#4copy	unmapped				TGTATGTGGTGTGTGCATATCTGCC
16	96	134	CUST_263_PI429446423	CUST_263_PI429446423	FALSE									Mettl3	unmapped				AGGATGACGGCTTTCTTTTCCTCTG
17	96	132	CUST_1_PI429446433	CUST_1_PI429446433	FALSE									15Gtl2#6copy	unmapped				GAGCTGAGTTTTGGTAGAGCAGATG
18	96	130	CUST_243_PI429446423	CUST_243_PI429446423	FALSE									Mettl3	unmapped				GCAGTTGTGATGGCTGACCCACCTT
19	96	128	CUST_43_PI429446426	CUST_43_PI429446426	FALSE									12Gtl2#1copy	unmapped				TTCCTACCTTAACAACGCCCCCACC
20	96	126	CUST_220_PI429446423	CUST_220_PI429446423	FALSE									Mettl3	unmapped				GGAGCTTGCTCTTACACAGAGTGTT
21	96	124	CUST_18_PI429446428	CUST_18_PI429446428	FALSE									13Gtl2#2copy	unmapped				AGGGTTCTTTTTGGCATTGCGCATG
22	96	122	NA	NA	ignore
23	96	120	CUST_95_PI429446423	CUST_95_PI429446423	FALSE									Mettl3	unmapped				CTCTTGTAACTTACGCTGACCACTC
24	96	118	NA	NA	ignore
25	96	116	CUST_90_PI429446428	CUST_90_PI429446428	FALSE									13Gtl2#2copy	unmapped				TACCTGGATTCACTAAGGTGCGCTT
26	96	114	CUST_195_PI429446423	CUST_195_PI429446423	FALSE									Mettl3	unmapped				TCTTTAGGTGACTGCTCTTTCCTTA
27	96	112	CUST_272_PI429446423	CUST_272_PI429446423	FALSE									Mettl3	unmapped				AATTGGGCAGAGAATGTCTGAACCT
28	96	110	CUST_32_PI429446423	CUST_32_PI429446423	FALSE									Mettl3	unmapped				CAGAAGCGGCACTGTCCCCAACCTT
29	96	108	CUST_64_PI429446423	CUST_64_PI429446423	FALSE									Mettl3	unmapped				GACCTTGCCCACTGATGCTGTTTCC
30	96	106	CUST_60_PI429446426	CUST_60_PI429446426	FALSE									12Gtl2#1copy	unmapped				GTGGCTTTTCTCAGTGCCTCTCAGC
31	96	104	CUST_21_PI429446419	CUST_21_PI429446419	FALSE									#10	unmapped				TAGACGCCGCACGCGTCGCCTTCGC
32	96	102	CUST_33_PI429446426	CUST_33_PI429446426	FALSE									12Gtl2#1copy	unmapped				GATGCCCCCAAAGCCCTAAACCTTC
33	96	100	CUST_234_PI429446423	CUST_234_PI429446423	FALSE									Mettl3	unmapped				TGTTGTGATATCCGCTACCTGGACG
34	96	98	CUST_68_PI429446419	CUST_68_PI429446419	FALSE									#10	unmapped				CCAGTCGCCGCTCTAAGCTCGCATC
35	96	96	CUST_79_PI429446430	CUST_79_PI429446430	FALSE									14Gtl2#4copy	unmapped				CCGCTCCCCCTTTCTTCCCCTGCCA
36	96	94	CUST_34_PI429446433	CUST_34_PI429446433	FALSE									15Gtl2#6copy	unmapped				CGTCACCCCTCCCCTTCTCTCCTCT
37	96	92	CUST_79_PI429446433	CUST_79_PI429446433	FALSE									15Gtl2#6copy	unmapped				GAGAAGCACCTGGCAAGTGCAGCTG
38	96	90	CUST_56_PI429446417	CUST_56_PI429446417	FALSE									#3	unmapped				CGCCTCGCCAGTCTCCGGGCTGGGC
39	96	88	CUST_29_PI429446419	CUST_29_PI429446419	FALSE									#10	unmapped				GGCAGCAGCCGCAGCCGGGCTCTCG
40	96	86	CUST_16_PI429446433	CUST_16_PI429446433	FALSE									15Gtl2#6copy	unmapped				ACAGCTGCCACATGTCTACCAAGAC
41	96	84	CUST_36_PI429446430	CUST_36_PI429446430	FALSE									14Gtl2#4copy	unmapped				GCCACTATGCTTTGGGGCATTAGGA
42	96	82	CUST_65_PI429446417	CUST_65_PI429446417	FALSE									#3	unmapped				CTCCTCCAGGCCGAAGTAGCTGCCG
43	96	80	CUST_118_PI429446423	CUST_118_PI429446423	FALSE									Mettl3	unmapped				ACAGGATTTGACTACAGTGACCACC
44	96	78	CUST_9_PI429446428	CUST_9_PI429446428	FALSE									13Gtl2#2copy	unmapped				GTGTGGAGGTGTGGGGGGTGATCTG
45	96	76	CUST_86_PI429446428	CUST_86_PI429446428	FALSE									13Gtl2#2copy	unmapped				TATGGGGAAATGTTAGTAGATACCT
46	96	74	CUST_87_PI429446428	CUST_87_PI429446428	FALSE									13Gtl2#2copy	unmapped				GGAAATGTTAGTAGATACCTGGATT
47	96	72	CUST_105_PI429446426	CUST_105_PI429446426	FALSE									12Gtl2#1copy	unmapped				TTCTTTGGACTCACAGTTGCCACCC
48	96	70	CUST_196_PI429446423	CUST_196_PI429446423	FALSE									Mettl3	unmapped				AGGTGACTGCTCTTTCCTTAACACA
49	96	68	CUST_253_PI429446423	CUST_253_PI429446423	FALSE									Mettl3	unmapped				TGGGACATTAACAGATGATGAGATG
50	96	66	CUST_104_PI429446426	CUST_104_PI429446426	FALSE									12Gtl2#1copy	unmapped				GCTTCTTCTTTGGACTCACAGTTGC
51	96	64	CUST_25_PI429446426	CUST_25_PI429446426	FALSE									12Gtl2#1copy	unmapped				TTTCTCTCCCAGTATCTGACACATT
52	96	62	CUST_36_PI429446430	CUST_36_PI429446430	FALSE									14Gtl2#4copy	unmapped				GCCACTATGCTTTGGGGCATTAGGA
53	96	60	CUST_90_PI429446428	CUST_90_PI429446428	FALSE									13Gtl2#2copy	unmapped				TACCTGGATTCACTAAGGTGCGCTT
54	96	58	CUST_20_PI429446426	CUST_20_PI429446426	FALSE									12Gtl2#1copy	unmapped				CTCTTTGCAAAAATGGGGTGTTTTC
55	96	56	CUST_7_PI429446423	CUST_7_PI429446423	FALSE									Mettl3	unmapped				CAAGGGATCTGAATTCTCGGACACG
56	96	54	CUST_302_PI429446423	CUST_302_PI429446423	FALSE									Mettl3	unmapped				AGGGAAATCCTCAAGGATTCAACCA
57	96	52	CUST_75_PI429446433	CUST_75_PI429446433	FALSE									15Gtl2#6copy	unmapped				CCCACTTCCTCATTCGCACCGAGAA
58	96	50	CUST_111_PI429446423	CUST_111_PI429446423	FALSE									Mettl3	unmapped				GCAGGGACCATCGCAGGGCAGAAAC
59	96	48	CUST_316_PI429446423	CUST_316_PI429446423	FALSE									Mettl3	unmapped				TCATAAACCAGATGAAATATATGGC
60	96	46	NA	NA	ignore
61	96	44	CUST_80_PI429446417	CUST_80_PI429446417	FALSE									#3	unmapped				CAGCGGCCTCTCGGAGAAGCGCGCA
62	96	42	CUST_102_PI429446417	CUST_102_PI429446417	FALSE									#3	unmapped				CGCCGTCGGGACTCAGCTCCGCCTC
63	96	40	CUST_26_PI429446426	CUST_26_PI429446426	FALSE									12Gtl2#1copy	unmapped				CTCCCAGTATCTGACACATTCAGAA
64	96	38	CUST_110_PI429446417	CUST_110_PI429446417	FALSE									#3	unmapped				GCCACTGCCGACGCCCGGGGCCGCT
65	96	36	CUST_65_PI429446419	CUST_65_PI429446419	FALSE									#10	unmapped				GCAGGTCCTCAGCGCCCAGTCGCCG
66	96	34	CUST_31_PI429446417	CUST_31_PI429446417	FALSE									#3	unmapped				CCGGCGACACCGCCTCCCGCGTCGG
67	96	32	CUST_268_PI429446423	CUST_268_PI429446423	FALSE									Mettl3	unmapped				GGTCACAGGAAGGGCCATGGAATTG
68	96	30	A_51_P362554	A_51_P362554	FALSE	NM_001011787	NM_001011787	257956	Olfr1307	olfactory receptor 1307	Mm.377314	ENSMUST00000099606		ref|NM_001011787|ens|ENSMUST00000099606|nap|NAP108606-1|nap|NAP112983-1	chr2:111785008-111784949	mm|2qE3	Mus musculus olfactory receptor 1307 (Olfr1307), mRNA [NM_001011787]	GO:0004871(signal transducer activity)|GO:0004930(G-protein coupled receptor activity)|GO:0004984(olfactory receptor activity)|GO:0005886(plasma membrane)|GO:0007165(signal transduction)|GO:0007186(G-protein coupled receptor signaling pathway)|GO:0007608(sensory perception of smell)|GO:0016020(membrane)|GO:0016021(integral to membrane)|GO:0050896(response to stimulus)	AACAGTGGGTTCATCTCTGTGGGTTCCTTCTTCATACTGATCATTTCATATATTGTTATC
69	96	28	CUST_21_PI429446430	CUST_21_PI429446430	FALSE									14Gtl2#4copy	unmapped				TGGTGCCCTGGCCTTCCCTTCCTTT
70	96	26	CUST_81_PI429446430	CUST_81_PI429446430	FALSE									14Gtl2#4copy	unmapped				TTTCTTCCCCTGCCAGGAGATGAGA
71	96	24	CUST_24_PI429446423	CUST_24_PI429446423	FALSE									Mettl3	unmapped				CGACGGAAGCAGGACTCTGGGCACT
72	96	22	CUST_20_PI429446430	CUST_20_PI429446430	FALSE									14Gtl2#4copy	unmapped				CTCTGTGGTGCCCTGGCCTTCCCTT
73	96	20	CUST_61_PI429446423	CUST_61_PI429446423	FALSE									Mettl3	unmapped				CTCAGATCTGGCCTTGACCTTGCCC
74	96	18	CUST_55_PI429446430	CUST_55_PI429446430	FALSE									14Gtl2#4copy	unmapped				CCCTGGGACAGTGCCAAGAACCAAG
75	96	16	CUST_3_PI429446433	CUST_3_PI429446433	FALSE									15Gtl2#6copy	unmapped				TTGGTAGAGCAGATGGTAACACGAA
76	96	14	CUST_30_PI429446417	CUST_30_PI429446417	FALSE									#3	unmapped				CGCCGCCGGCGACACCGCCTCCCGC
77	96	12	CUST_59_PI429446433	CUST_59_PI429446433	FALSE									15Gtl2#6copy	unmapped				TCTTCCCCTTTCTTCTCTCTCCTCT
78	96	10	CUST_77_PI429446417	CUST_77_PI429446417	FALSE									#3	unmapped				CTCCTTGGAGGTCGCCAGCGGCCTC
79	96	8	CUST_99_PI429446423	CUST_99_PI429446423	FALSE									Mettl3	unmapped				CACTCCAAGCTGTCTGCCATGATGG
80	96	6	DarkCorner	DarkCorner	pos
81	96	4	GE_BrightCorner	GE_BrightCorner	pos
82	96	2	GE_BrightCorner	GE_BrightCorner	pos
83	96	163	GE_BrightCorner	GE_BrightCorner	pos
84	96	161	DarkCorner	DarkCorner	pos
85	96	159	CUST_349_PI429446423	CUST_349_PI429446423	FALSE									Mettl3	unmapped				GCAAAGGTATCCGGACGGCATCATC
86	96	157	CUST_43_PI429446428	CUST_43_PI429446428	FALSE									13Gtl2#2copy	unmapped				CTCCTCATTCTGGGCTGGCTGGCTG
87	96	155	CUST_31_PI429446419	CUST_31_PI429446419	FALSE									#10	unmapped				GCAGCCGGGCTCTCGCACCAGCTCC
88	96	153	CUST_98_PI429446426	CUST_98_PI429446426	FALSE									12Gtl2#1copy	unmapped				ATCATTCTCGCTCCTTTTCTGTCAC
89	96	151	CUST_10_PI429446419	CUST_10_PI429446419	FALSE									#10	unmapped				GTACTGCTCCGCGGGCCGCGGCTGG
90	96	149	CUST_26_PI429446423	CUST_26_PI429446423	FALSE									Mettl3	unmapped				AGGACTCTGGGCACTTGGATTTAAG
91	96	147	CUST_17_PI429446430	CUST_17_PI429446430	FALSE									14Gtl2#4copy	unmapped				TTAGCGTCTAAGTCCCTCTGTGGTG
92	96	145	CUST_253_PI429446423	CUST_253_PI429446423	FALSE									Mettl3	unmapped				TGGGACATTAACAGATGATGAGATG
93	96	143	CUST_46_PI429446426	CUST_46_PI429446426	FALSE									12Gtl2#1copy	unmapped				CGCCCCCACCCCTGAAAAGGCCTGA
94	96	141	CUST_50_PI429446423	CUST_50_PI429446423	FALSE									Mettl3	unmapped				TGGCCCCTGAACTAGCTACAGACCC
95	96	139	CUST_24_PI429446421	CUST_24_PI429446421	FALSE									anti_actB	unmapped				GAAGGCTGGAAAAGAGCCTCAGGGC
96	96	137	CUST_77_PI429446417	CUST_77_PI429446417	FALSE									#3	unmapped				CTCCTTGGAGGTCGCCAGCGGCCTC
97	96	135	CUST_93_PI429446426	CUST_93_PI429446426	FALSE									12Gtl2#1copy	unmapped				CTCTGACTTTCCTTTTAGGGTCTCA
98	96	133	CUST_15_PI429446419	CUST_15_PI429446419	FALSE									#10	unmapped				CAGCGGAGGCCGGTGCCACAGCGCT
99	96	131	CUST_174_PI429446423	CUST_174_PI429446423	FALSE									Mettl3	unmapped				TTTTGTGATTATGGGACCAAGGAAG
100	96	129	CUST_31_PI429446421	CUST_31_PI429446421	FALSE									anti_actB	unmapped				CTCGTTGCCAATAGTGATGACCTGG
101	96	127	CUST_27_PI429446430	CUST_27_PI429446430	FALSE									14Gtl2#4copy	unmapped				ATGGTGGCTGGTGCTGCTGGTTGTG
102	96	125	CUST_307_PI429446423	CUST_307_PI429446423	FALSE									Mettl3	unmapped				GGGCCTGGACTGCGATGTGATTGTA
103	96	123	CUST_84_PI429446417	CUST_84_PI429446417	FALSE									#3	unmapped				GCGCACGGCCGCCCGCCAGCCCCGC
104	96	121	CUST_14_PI429446430	CUST_14_PI429446430	FALSE									14Gtl2#4copy	unmapped				GTTCATTCATGCATGTTAGCGTCTA
105	96	119	(+)E1A_r60_n11	(+)E1A_r60_n11	pos
106	96	117	CUST_192_PI429446423	CUST_192_PI429446423	FALSE									Mettl3	unmapped				AAGCACACTGATGAATCTTTAGGTG
107	96	115	CUST_25_PI429446430	CUST_25_PI429446430	FALSE									14Gtl2#4copy	unmapped				CCTTTCCATCATGGTGGCTGGTGCT
108	96	113	CUST_89_PI429446428	CUST_89_PI429446428	FALSE									13Gtl2#2copy	unmapped				GTAGATACCTGGATTCACTAAGGTG
109	96	111	CUST_22_PI429446428	CUST_22_PI429446428	FALSE									13Gtl2#2copy	unmapped				GCATGATGGCTGCGGCTAGATTCTG
110	96	109	CUST_84_PI429446426	CUST_84_PI429446426	FALSE									12Gtl2#1copy	unmapped				GGGTGGGGGTGGGGGGCTCTTCCAG
111	96	107	CUST_25_PI429446417	CUST_25_PI429446417	FALSE									#3	unmapped				GCGGGGGTGGACGAGCCGTTGCTGC
112	96	105	CUST_1_PI429446433	CUST_1_PI429446433	FALSE									15Gtl2#6copy	unmapped				GAGCTGAGTTTTGGTAGAGCAGATG
113	96	103	CUST_292_PI429446423	CUST_292_PI429446423	FALSE									Mettl3	unmapped				GACGGGTCACTGGTTAAACCACGGG
114	96	101	CUST_59_PI429446433	CUST_59_PI429446433	FALSE									15Gtl2#6copy	unmapped				TCTTCCCCTTTCTTCTCTCTCCTCT
115	96	99	CUST_82_PI429446430	CUST_82_PI429446430	FALSE									14Gtl2#4copy	unmapped				TCCCCTGCCAGGAGATGAGAAAAAT
116	96	97	CUST_25_PI429446433	CUST_25_PI429446433	FALSE									15Gtl2#6copy	unmapped				CAGCATCTACTAAGATCACTGCTGC
117	96	95	CUST_120_PI429446423	CUST_120_PI429446423	FALSE									Mettl3	unmapped				ACTACAGTGACCACCTTTGCCAGCT
118	96	93	CUST_89_PI429446428	CUST_89_PI429446428	FALSE									13Gtl2#2copy	unmapped				GTAGATACCTGGATTCACTAAGGTG
119	96	91	CUST_29_PI429446421	CUST_29_PI429446421	FALSE									anti_actB	unmapped				ATCGGAACCGCTCGTTGCCAATAGT
120	96	89	CUST_109_PI429446426	CUST_109_PI429446426	FALSE									12Gtl2#1copy	unmapped				CACCCACCTGTCACCCCAAGATAGA
121	96	87	CUST_51_PI429446426	CUST_51_PI429446426	FALSE									12Gtl2#1copy	unmapped				GTCACCTCGCCGGCAAGCTGCTGAT
122	96	85	CUST_124_PI429446417	CUST_124_PI429446417	FALSE									#3	unmapped				TTGTGGAAGTCCGTGGACGGCTTGG
123	96	83	CUST_72_PI429446417	CUST_72_PI429446417	FALSE									#3	unmapped				ACTGCTGCGGCGTGCACACCAACTC
124	96	81	CUST_50_PI429446430	CUST_50_PI429446430	FALSE									14Gtl2#4copy	unmapped				TGTATGTGGTGTGTGCATATCTGCC
125	96	79	CUST_222_PI429446423	CUST_222_PI429446423	FALSE									Mettl3	unmapped				CTTACACAGAGTGTTGGGGGTGACT
126	96	77	CUST_49_PI429446433	CUST_49_PI429446433	FALSE									15Gtl2#6copy	unmapped				CTTCCTCTGCCTCTTCCCTACACGT
127	96	75	CUST_116_PI429446417	CUST_116_PI429446417	FALSE									#3	unmapped				ACTGCTGCTTCCCCGGGAGTTTTCC
128	96	73	CUST_306_PI429446423	CUST_306_PI429446423	FALSE									Mettl3	unmapped				AACCAGGGCCTGGACTGCGATGTGA
129	96	71	CUST_46_PI429446433	CUST_46_PI429446433	FALSE									15Gtl2#6copy	unmapped				CTTCTGACTTTTCTTCTTCCTCTGC
130	96	69	CUST_22_PI429446428	CUST_22_PI429446428	FALSE									13Gtl2#2copy	unmapped				GCATGATGGCTGCGGCTAGATTCTG
131	96	67	(-)3xSLv1	(-)3xSLv1	neg
132	96	65	CUST_286_PI429446423	CUST_286_PI429446423	FALSE									Mettl3	unmapped				TCAGCTGCAGCGCATCATTAGGACG
133	96	63	CUST_35_PI429446423	CUST_35_PI429446423	FALSE									Mettl3	unmapped				CCCCAACCTTCCGTAGTGATAGTCC
134	96	61	CUST_57_PI429446426	CUST_57_PI429446426	FALSE									12Gtl2#1copy	unmapped				ACCCTGGGCTCAGCGGTGGCTTTTC
135	96	59	CUST_58_PI429446423	CUST_58_PI429446423	FALSE									Mettl3	unmapped				GTTGCTACACCACCTCTCAGATCTG
136	96	57	RC7	RC7	pos
137	96	55	CUST_241_PI429446423	CUST_241_PI429446423	FALSE									Mettl3	unmapped				GGGCAAATTTGCAGTTGTGATGGCT
138	96	53	CUST_47_PI429446423	CUST_47_PI429446423	FALSE									Mettl3	unmapped				CCAGCACAACATCTGTGGCCCCTGA
139	96	51	CUST_120_PI429446426	CUST_120_PI429446426	FALSE									12Gtl2#1copy	unmapped				TTTTCGAGAGGACATTTGATGGACA
140	96	49	CUST_86_PI429446428	CUST_86_PI429446428	FALSE									13Gtl2#2copy	unmapped				TATGGGGAAATGTTAGTAGATACCT
141	96	47	CUST_56_PI429446423	CUST_56_PI429446423	FALSE									Mettl3	unmapped				TAGAGAAGAAGTTGCTACACCACCT
142	96	45	CUST_60_PI429446419	CUST_60_PI429446419	FALSE									#10	unmapped				GCGGCGGGATGGGAGCAGCAAGCAA
143	96	43	CUST_43_PI429446421	CUST_43_PI429446421	FALSE									anti_actB	unmapped				AGAGGATGCGGCAGTGGCCATCTCC
144	96	41	CUST_30_PI429446428	CUST_30_PI429446428	FALSE									13Gtl2#2copy	unmapped				TTGACTTTTGGTAAATCACCTTTTG
145	96	39	CUST_268_PI429446423	CUST_268_PI429446423	FALSE									Mettl3	unmapped				GGTCACAGGAAGGGCCATGGAATTG
146	96	37	CUST_63_PI429446433	CUST_63_PI429446433	FALSE									15Gtl2#6copy	unmapped				CCTCTCCTTTTTTCCTCCTCTATCC
147	96	35	CUST_16_PI429446423	CUST_16_PI429446423	FALSE									Mettl3	unmapped				TAAGAAACAGCTGGACTCGCTTCGC
148	96	33	CUST_70_PI429446426	CUST_70_PI429446426	FALSE									12Gtl2#1copy	unmapped				CCTAGGCTTGCTGGCCATAGGGGGC
149	96	31	CUST_74_PI429446426	CUST_74_PI429446426	FALSE									12Gtl2#1copy	unmapped				GGGGCTTACGCGAAAGCAGCTGCAG
150	96	29	CUST_46_PI429446433	CUST_46_PI429446433	FALSE									15Gtl2#6copy	unmapped				CTTCTGACTTTTCTTCTTCCTCTGC
151	96	27	CUST_71_PI429446417	CUST_71_PI429446417	FALSE									#3	unmapped				GCGGTACTGCTGCGGCGTGCACACC
152	96	25	CUST_21_PI429446430	CUST_21_PI429446430	FALSE									14Gtl2#4copy	unmapped				TGGTGCCCTGGCCTTCCCTTCCTTT
153	96	23	NA	NA	ignore
154	96	21	CUST_16_PI429446426	CUST_16_PI429446426	FALSE									12Gtl2#1copy	unmapped				AGGGGCCTTCTTTTGGGGGGCTCTT
155	96	19	CUST_30_PI429446423	CUST_30_PI429446423	FALSE									Mettl3	unmapped				TTAAGGAACCCAGAAGCGGCACTGT
156	96	17	CUST_21_PI429446419	CUST_21_PI429446419	FALSE									#10	unmapped				TAGACGCCGCACGCGTCGCCTTCGC
157	96	15	CUST_32_PI429446428	CUST_32_PI429446428	FALSE									13Gtl2#2copy	unmapped				GTAAATCACCTTTTGCCGTTTCCTT
158	96	13	CUST_57_PI429446423	CUST_57_PI429446423	FALSE									Mettl3	unmapped				AAGAAGTTGCTACACCACCTCTCAG
159	96	11	CUST_49_PI429446430	CUST_49_PI429446430	FALSE									14Gtl2#4copy	unmapped				TTCTGTGTATGTGGTGTGTGCATAT
160	96	9	CUST_192_PI429446423	CUST_192_PI429446423	FALSE									Mettl3	unmapped				AAGCACACTGATGAATCTTTAGGTG
161	96	7	CUST_177_PI429446423	CUST_177_PI429446423	FALSE									Mettl3	unmapped				ACCAAGGAAGAGTGCATGAAAGCCA
162	96	5	DarkCorner	DarkCorner	pos
163	96	3	DarkCorner	DarkCorner	pos
164	96	1	GE_BrightCorner	GE_BrightCorner	pos
165	95	164	DarkCorner	DarkCorner	pos
166	95	162	DarkCorner	DarkCorner	pos
167	95	160	CUST_253_PI429446423	CUST_253_PI429446423	FALSE									Mettl3	unmapped				TGGGACATTAACAGATGATGAGATG
168	95	158	CUST_19_PI429446419	CUST_19_PI429446419	FALSE									#10	unmapped				GCGCTCCGTGTAGACGCCGCACGCG
169	95	156	CUST_154_PI429446423	CUST_154_PI429446423	FALSE									Mettl3	unmapped				GGTCAGTCAGGAGATCCTAGAGCTA
170	95	154	CUST_89_PI429446426	CUST_89_PI429446426	FALSE									12Gtl2#1copy	unmapped				CTTCATGTCCTCCACAGGGCCTCTG
171	95	152	CUST_115_PI429446417	CUST_115_PI429446417	FALSE									#3	unmapped				ACGCAACTGCTGCTTCCCCGGGAGT
172	95	150	CUST_40_PI429446426	CUST_40_PI429446426	FALSE									12Gtl2#1copy	unmapped				TCCGAAGTGCATCGGTTCCTACCTT
173	95	148	NA	NA	ignore
174	95	146	A_51_P191669	A_51_P191669	FALSE	NM_007694	NM_007694	12653	Chgb	chromogranin B	Mm.255241	ENSMUST00000028826		ref|NM_007694|ens|ENSMUST00000028826|gb|AK133786|gb|AK158857	chr2:132620703-132620762	mm|2qF2	Mus musculus chromogranin B (Chgb), mRNA [NM_007694]	GO:0005515(protein binding)|GO:0005576(extracellular region)|GO:0030141(secretory granule)	TAGCGTGACTTGTAGCGTATTCTTCCTGCAAAATAGATGTTTCACGTGTCTGTGACAATG
175	95	144	CUST_236_PI429446423	CUST_236_PI429446423	FALSE									Mettl3	unmapped				TCCGCTACCTGGACGTCAGTATCTT
176	95	142	CUST_35_PI429446428	CUST_35_PI429446428	FALSE									13Gtl2#2copy	unmapped				CCGTTTCCTTTGTCCCCGTGAAGCC
177	95	140	CUST_106_PI429446426	CUST_106_PI429446426	FALSE									12Gtl2#1copy	unmapped				TGGACTCACAGTTGCCACCCACCTG
178	95	138	CUST_33_PI429446419	CUST_33_PI429446419	FALSE									#10	unmapped				TCTCGCACCAGCTCCGTGCGCGCGG
179	95	136	CUST_39_PI429446419	CUST_39_PI429446419	FALSE									#10	unmapped				AGTGAGGGCAGTGAGCGCAGCCGCC
180	95	134	NA	NA	ignore
181	95	132	CUST_1_PI429446428	CUST_1_PI429446428	FALSE									13Gtl2#2copy	unmapped				GTCTCATAGGAAGGAAAAGATAAAA
182	95	130	CUST_22_PI429446433	CUST_22_PI429446433	FALSE									15Gtl2#6copy	unmapped				TTGCCACACAGTGACCAGCATCTAC
183	95	128	CUST_42_PI429446417	CUST_42_PI429446417	FALSE									#3	unmapped				TCGCCGCCGCCTCCTCCTGCAAGCC
184	95	126	CUST_112_PI429446423	CUST_112_PI429446423	FALSE									Mettl3	unmapped				GACCATCGCAGGGCAGAAACGGCGT
185	95	124	CUST_146_PI429446423	CUST_146_PI429446423	FALSE									Mettl3	unmapped				TTTTGAACCAACAGTCAACGAAAGA
186	95	122	CUST_54_PI429446433	CUST_54_PI429446433	FALSE									15Gtl2#6copy	unmapped				CTTTGCTTTTTCTTTTGATTCTTCA
187	95	120	CUST_308_PI429446423	CUST_308_PI429446423	FALSE									Mettl3	unmapped				TGGACTGCGATGTGATTGTAGCTGA
188	95	118	CUST_44_PI429446417	CUST_44_PI429446417	FALSE									#3	unmapped				CTCCTCCTGCAAGCCCACCGCGCGG
189	95	116	CUST_81_PI429446423	CUST_81_PI429446423	FALSE									Mettl3	unmapped				CTCCAGAAATTTGCCGCCCAGGAGT
190	95	114	CUST_21_PI429446421	CUST_21_PI429446421	FALSE									anti_actB	unmapped				TCCATACCCAAGAAGGAAGGCTGGA
191	95	112	CUST_64_PI429446423	CUST_64_PI429446423	FALSE									Mettl3	unmapped				GACCTTGCCCACTGATGCTGTTTCC
192	95	110	CUST_34_PI429446421	CUST_34_PI429446421	FALSE									anti_actB	unmapped				GATGACCTGGCCGTCAGGCAGCTCA
193	95	108	CUST_75_PI429446430	CUST_75_PI429446430	FALSE									14Gtl2#4copy	unmapped				CTGGGTGGCTGTTCTCCTCCCCGCT
194	95	106	CUST_84_PI429446430	CUST_84_PI429446430	FALSE									14Gtl2#4copy	unmapped				GGAGATGAGAAAAATTAGCTTTCTC
195	95	104	CUST_70_PI429446433	CUST_70_PI429446433	FALSE									15Gtl2#6copy	unmapped				CCCCCCTTCTGTCTTTCCTCCTTTT
196	95	102	CUST_43_PI429446421	CUST_43_PI429446421	FALSE									anti_actB	unmapped				AGAGGATGCGGCAGTGGCCATCTCC
197	95	100	CUST_67_PI429446428	CUST_67_PI429446428	FALSE									13Gtl2#2copy	unmapped				GGGGCGGGGTGGGGAGGGAAGAGGA
198	95	98	CUST_295_PI429446423	CUST_295_PI429446423	FALSE									Mettl3	unmapped				AAACCACGGGAAGGAACACTGCTTG
199	95	96	NA	NA	ignore
200	95	94	CUST_172_PI429446423	CUST_172_PI429446423	FALSE									Mettl3	unmapped				GGTGCAAGAATTTTGTGATTATGGG
201	95	92	CUST_3_PI429446423	CUST_3_PI429446423	FALSE									Mettl3	unmapped				GACTACAAAGACGATGACGACAAGG
202	95	90	CUST_102_PI429446417	CUST_102_PI429446417	FALSE									#3	unmapped				CGCCGTCGGGACTCAGCTCCGCCTC
203	95	88	CUST_83_PI429446417	CUST_83_PI429446417	FALSE									#3	unmapped				GAAGCGCGCACGGCCGCCCGCCAGC
204	95	86	CUST_41_PI429446430	CUST_41_PI429446430	FALSE									14Gtl2#4copy	unmapped				GGGGTGGTGTCTGTTGGTAGATGCT
205	95	84	CUST_83_PI429446433	CUST_83_PI429446433	FALSE									15Gtl2#6copy	unmapped				AGCTGCATGCTCTTCTGAACACCCC
206	95	82	CUST_44_PI429446428	CUST_44_PI429446428	FALSE									13Gtl2#2copy	unmapped				CATTCTGGGCTGGCTGGCTGAGGGG
207	95	80	CUST_84_PI429446433	CUST_84_PI429446433	FALSE									15Gtl2#6copy	unmapped				CATGCTCTTCTGAACACCCCCTGCC
208	95	78	CUST_122_PI429446417	CUST_122_PI429446417	FALSE									#3	unmapped				CCGAGCCAAGTTGTGGAAGTCCGTG
209	95	76	CUST_7_PI429446419	CUST_7_PI429446419	FALSE									#10	unmapped				CAGCGCCCTCAGCGGGTACTGCTCC
210	95	74	CUST_3_PI429446430	CUST_3_PI429446430	FALSE									14Gtl2#4copy	unmapped				AGCCGTCGATGTGGTATTCGAGGCT
211	95	72	CUST_30_PI429446421	CUST_30_PI429446421	FALSE									anti_actB	unmapped				AACCGCTCGTTGCCAATAGTGATGA
212	95	70	CUST_56_PI429446426	CUST_56_PI429446426	FALSE									12Gtl2#1copy	unmapped				CGGTAACCCTGGGCTCAGCGGTGGC
213	95	68	CUST_54_PI429446428	CUST_54_PI429446428	FALSE									13Gtl2#2copy	unmapped				GGCAGGTTTCTAGAATGTTCTATTG
214	95	66	CUST_13_PI429446428	CUST_13_PI429446428	FALSE									13Gtl2#2copy	unmapped				ATCTGAGTGCTGGAAATTTGGAGGC
215	95	64	CUST_69_PI429446430	CUST_69_PI429446430	FALSE									14Gtl2#4copy	unmapped				TTACTGCTCTCTCACTTTTAGCTGG
216	95	62	CUST_55_PI429446430	CUST_55_PI429446430	FALSE									14Gtl2#4copy	unmapped				CCCTGGGACAGTGCCAAGAACCAAG
217	95	60	CUST_122_PI429446426	CUST_122_PI429446426	FALSE									12Gtl2#1copy	unmapped				GACATTTGATGGACATGTTGCCCCC
218	95	58	CUST_23_PI429446430	CUST_23_PI429446430	FALSE									14Gtl2#4copy	unmapped				GCCTTCCCTTCCTTTCCATCATGGT
219	95	56	A_51_P102311	A_51_P102311	FALSE	NM_011661	NM_011661	22173	Tyr	tyrosinase	Mm.238127	ENSMUST00000004770		ref|NM_011661|ens|ENSMUST00000004770|gb|M24560|gb|D84001	chr7:94576324-94576265	mm|7qD3	Mus musculus tyrosinase (Tyr), mRNA [NM_011661]	GO:0004497(monooxygenase activity)|GO:0004503(monophenol monooxygenase activity)|GO:0005507(copper ion binding)|GO:0005515(protein binding)|GO:0005737(cytoplasm)|GO:0008152(metabolic process)|GO:0008283(cell proliferation)|GO:0016020(membrane)|GO:0016021(integral to membrane)|GO:0016491(oxidoreductase activity)|GO:0042438(melanin biosynthetic process)|GO:0042470(melanosome)|GO:0042803(protein hom…	TACTCTGCTACCTAGCATGTATATATAAATCTACCCAACAAATGTTCATTACAGCTGACA
220	95	54	CUST_59_PI429446426	CUST_59_PI429446426	FALSE									12Gtl2#1copy	unmapped				CAGCGGTGGCTTTTCTCAGTGCCTC
221	95	52	CUST_108_PI429446426	CUST_108_PI429446426	FALSE									12Gtl2#1copy	unmapped				GTTGCCACCCACCTGTCACCCCAAG
222	95	50	CUST_215_PI429446423	CUST_215_PI429446423	FALSE									Mettl3	unmapped				GCAGCAAGGAGCATATGCCAAGCCA
223	95	48	CUST_222_PI429446423	CUST_222_PI429446423	FALSE									Mettl3	unmapped				CTTACACAGAGTGTTGGGGGTGACT
224	95	46	CUST_295_PI429446423	CUST_295_PI429446423	FALSE									Mettl3	unmapped				AAACCACGGGAAGGAACACTGCTTG
225	95	44	CUST_44_PI429446421	CUST_44_PI429446421	FALSE									anti_actB	unmapped				ATGCGGCAGTGGCCATCTCCTGCTC
226	95	42	CUST_25_PI429446423	CUST_25_PI429446423	FALSE									Mettl3	unmapped				GAAGCAGGACTCTGGGCACTTGGAT
227	95	40	CUST_64_PI429446430	CUST_64_PI429446430	FALSE									14Gtl2#4copy	unmapped				AATTATGACATCCTTGAATTTTTTC
228	95	38	CUST_64_PI429446428	CUST_64_PI429446428	FALSE									13Gtl2#2copy	unmapped				ACTGCGGAATTTTGGGGGGCGGGGT
229	95	36	CUST_113_PI429446423	CUST_113_PI429446423	FALSE									Mettl3	unmapped				TCGCAGGGCAGAAACGGCGTGCAGA
230	95	34	CUST_309_PI429446423	CUST_309_PI429446423	FALSE									Mettl3	unmapped				TGCGATGTGATTGTAGCTGAGGTTC
231	95	32	CUST_30_PI429446421	CUST_30_PI429446421	FALSE									anti_actB	unmapped				AACCGCTCGTTGCCAATAGTGATGA
232	95	30	CUST_166_PI429446423	CUST_166_PI429446423	FALSE									Mettl3	unmapped				TGAAAAGTTTCGCTCTCGAGGTCGG
233	95	28	A_51_P426886	A_51_P426886	FALSE	NM_008155	NM_008155	14751	Gpi1	glucose phosphate isomerase 1	Mm.589	ENSMUST00000135243		ref|NM_008155|ens|ENSMUST00000135243|ens|ENSMUST00000038027|ref|XM_003689446	chr7:34987254-34987195	mm|7qB1	Mus musculus glucose phosphate isomerase 1 (Gpi1), mRNA [NM_008155]	GO:0001525(angiogenesis)|GO:0004347(glucose-6-phosphate isomerase activity)|GO:0005125(cytokine activity)|GO:0005515(protein binding)|GO:0005576(extracellular region)|GO:0005615(extracellular space)|GO:0005634(nucleus)|GO:0005737(cytoplasm)|GO:0005829(cytosol)|GO:0005886(plasma membrane)|GO:0005975(carbohydrate metabolic process)|GO:0006006(glucose metabolic process)|GO:0006094(gluconeogenesis)|G…	ATGGAAGGGCTTTGACGTGTCATGTTGTTCTGACCTGTATTTCACACCCCAGCTAGAATA
234	95	26	CUST_311_PI429446423	CUST_311_PI429446423	FALSE									Mettl3	unmapped				TTGTAGCTGAGGTTCGTTCCACCAG
235	95	24	CUST_120_PI429446417	CUST_120_PI429446417	FALSE									#3	unmapped				TTTCCAGTTCCCGAGCCAAGTTGTG
236	95	22	CUST_258_PI429446423	CUST_258_PI429446423	FALSE									Mettl3	unmapped				CGCAGGCTCAATATACCAGTGCTAC
237	95	20	CUST_99_PI429446417	CUST_99_PI429446417	FALSE									#3	unmapped				AGCCGCCGGTGGCGACGCCGTCGGG
238	95	18	CUST_86_PI429446433	CUST_86_PI429446433	FALSE									15Gtl2#6copy	unmapped				TGAACACCCCCTGCCAAGAGCACCA
239	95	16	(-)3xSLv1	(-)3xSLv1	neg
240	95	14	CUST_74_PI429446417	CUST_74_PI429446417	FALSE									#3	unmapped				CGTGCACACCAACTCCTCCTTGGAG
241	95	12	CUST_42_PI429446419	CUST_42_PI429446419	FALSE									#10	unmapped				CGCAGCCGCCCAGAGCGCGGGGCGC
242	95	10	CUST_101_PI429446426	CUST_101_PI429446426	FALSE									12Gtl2#1copy	unmapped				TTTCTGTCACCAGACGCTTCTTCTT
243	95	8	CUST_257_PI429446423	CUST_257_PI429446423	FALSE									Mettl3	unmapped				AGATGCGCAGGCTCAATATACCAGT
244	95	6	CUST_270_PI429446423	CUST_270_PI429446423	FALSE									Mettl3	unmapped				AGGGCCATGGAATTGGGCAGAGAAT
245	95	4	DarkCorner	DarkCorner	pos
246	95	2	DarkCorner	DarkCorner	pos
247	95	163	DarkCorner	DarkCorner	pos
248	95	161	CUST_18_PI429446433	CUST_18_PI429446433	FALSE									15Gtl2#6copy	unmapped				CATGTCTACCAAGACCACAGTTGCC
249	95	159	CUST_89_PI429446417	CUST_89_PI429446417	FALSE									#3	unmapped				GCCGCCGCCCTCCGCCGCCGCCTCC
250	95	157	CUST_105_PI429446426	CUST_105_PI429446426	FALSE									12Gtl2#1copy	unmapped				TTCTTTGGACTCACAGTTGCCACCC
251	95	155	CUST_13_PI429446417	CUST_13_PI429446417	FALSE									#3	unmapped				GGCAGAGAGCCTCCGGGACGCGGAG
252	95	153	CUST_77_PI429446428	CUST_77_PI429446428	FALSE									13Gtl2#2copy	unmapped				GGGGTCGGGAGCGAGATGGGTTGCG
253	95	151	CUST_30_PI429446428	CUST_30_PI429446428	FALSE									13Gtl2#2copy	unmapped				TTGACTTTTGGTAAATCACCTTTTG
254	95	149	CUST_46_PI429446417	CUST_46_PI429446417	FALSE									#3	unmapped				AAGCCCACCGCGCGGCCCGCCTTCT
255	95	147	CUST_85_PI429446417	CUST_85_PI429446417	FALSE									#3	unmapped				CGGCCGCCCGCCAGCCCCGCGCCGC
256	95	145	CUST_83_PI429446430	CUST_83_PI429446430	FALSE									14Gtl2#4copy	unmapped				TGCCAGGAGATGAGAAAAATTAGCT
257	95	143	CUST_38_PI429446433	CUST_38_PI429446433	FALSE									15Gtl2#6copy	unmapped				CCTCTTCCCTCTTTTCATCCTTTTT
258	95	141	CUST_85_PI429446426	CUST_85_PI429446426	FALSE									12Gtl2#1copy	unmapped				GGGGTGGGGGGCTCTTCCAGCTTCA
259	95	139	CUST_71_PI429446426	CUST_71_PI429446426	FALSE									12Gtl2#1copy	unmapped				GCTTGCTGGCCATAGGGGGCTTACG
260	95	137	CUST_71_PI429446430	CUST_71_PI429446430	FALSE									14Gtl2#4copy	unmapped				CTCACTTTTAGCTGGTAGGTCTGGG
261	95	135	CUST_90_PI429446423	CUST_90_PI429446423	FALSE									Mettl3	unmapped				CTCCTCCAAGATGATGCACATCCTA
262	95	133	CUST_132_PI429446423	CUST_132_PI429446423	FALSE									Mettl3	unmapped				CCAGCTAAGGAGCCGGCTAAGAAGT
263	95	131	CUST_188_PI429446423	CUST_188_PI429446423	FALSE									Mettl3	unmapped				ACTTCAGACGAATTATCAATAAGCA
264	95	129	CUST_89_PI429446430	CUST_89_PI429446430	FALSE									14Gtl2#4copy	unmapped				TACACCAAATTCTGCTTTGGACTGA
265	95	127	CUST_6_PI429446419	CUST_6_PI429446419	FALSE									#10	unmapped				TTCAGCAGCGCCCTCAGCGGGTACT
266	95	125	A_51_P425205	A_51_P425205	FALSE		BC057074	20655	Sod1	superoxide dismutase 1, soluble	Mm.466779			gb|BC057074|gb|AK080908|gb|AK080929|gb|CA976335	chr16:90223273-90223332	mm|16qC3.3	Mus musculus superoxide dismutase 1, soluble, mRNA (cDNA clone IMAGE:5697222), with apparent retained intron. [BC057074]	GO:0000187(activation of MAPK activity)|GO:0000302(response to reactive oxygen species)|GO:0000303(response to superoxide)|GO:0001541(ovarian follicle development)|GO:0001819(positive regulation of cytokine production)|GO:0001895(retina homeostasis)|GO:0002262(myeloid cell homeostasis)|GO:0004784(superoxide dismutase activity)|GO:0005507(copper ion binding)|GO:0005515(protein binding)|GO:0005615(…	GTATTTTATTTAGTATCAAGTATTGCTTGCTTCCTTAAGTGTGGGAAGGTAAAGAAGGTG
267	95	123	CUST_26_PI429446423	CUST_26_PI429446423	FALSE									Mettl3	unmapped				AGGACTCTGGGCACTTGGATTTAAG
268	95	121	CUST_92_PI429446433	CUST_92_PI429446433	FALSE									15Gtl2#6copy	unmapped				AAGACTTGGGCATGACCCAGCCTGG
269	95	119	CUST_88_PI429446428	CUST_88_PI429446428	FALSE									13Gtl2#2copy	unmapped				TGTTAGTAGATACCTGGATTCACTA
270	95	117	CUST_12_PI429446417	CUST_12_PI429446417	FALSE									#3	unmapped				GTCCGGGCAGAGAGCCTCCGGGACG
271	95	115	CUST_120_PI429446426	CUST_120_PI429446426	FALSE									12Gtl2#1copy	unmapped				TTTTCGAGAGGACATTTGATGGACA
272	95	113	CUST_1_PI429446421	CUST_1_PI429446421	FALSE									anti_actB	unmapped				GGTACCACCAGACAGCACTGTGTTG
273	95	111	NA	NA	ignore
274	95	109	CUST_174_PI429446423	CUST_174_PI429446423	FALSE									Mettl3	unmapped				TTTTGTGATTATGGGACCAAGGAAG
275	95	107	CUST_217_PI429446423	CUST_217_PI429446423	FALSE									Mettl3	unmapped				GCATATGCCAAGCCAGGAGCTTGCT
276	95	105	CUST_32_PI429446417	CUST_32_PI429446417	FALSE									#3	unmapped				GACACCGCCTCCCGCGTCGGGGTCC
277	95	103	(-)3xSLv1	(-)3xSLv1	neg
278	95	101	CUST_19_PI429446423	CUST_19_PI429446423	FALSE									Mettl3	unmapped				CTCGCTTCGCGAGAGATTGCAGCGG
279	95	99	CUST_321_PI429446423	CUST_321_PI429446423	FALSE									Mettl3	unmapped				ATGATTGAGAGACTGTCCCCTGGCA
280	95	97	CUST_12_PI429446430	CUST_12_PI429446430	FALSE									14Gtl2#4copy	unmapped				ATCTGGTGTGGTTCATTCATGCATG
281	95	95	A_51_P172231	A_51_P172231	FALSE	NM_026960	NM_026960	69146	Gsdmd	gasdermin D	Mm.27385	ENSMUST00000023238		ref|NM_026960|ens|ENSMUST00000023238|gb|AK007710|gb|AK088747	chr15:75697536-75697595	mm|15qD3	Mus musculus gasdermin D (Gsdmd), mRNA [NM_026960]	GO:0003674(molecular_function)|GO:0005575(cellular_component)|GO:0031668(cellular response to extracellular stimulus)	TGCTAGAAGAATGTGGCCTAAGGCTGCAGGTAGAATCCCCCCAGGTGCACTGGGAACCAA
282	95	93	CUST_93_PI429446433	CUST_93_PI429446433	FALSE									15Gtl2#6copy	unmapped				TTGGGCATGACCCAGCCTGGAAGAG
283	95	91	CUST_99_PI429446433	CUST_99_PI429446433	FALSE									15Gtl2#6copy	unmapped				ACCAGCCATGATGGGGACTTTGGCA
284	95	89	CUST_34_PI429446421	CUST_34_PI429446421	FALSE									anti_actB	unmapped				GATGACCTGGCCGTCAGGCAGCTCA
285	95	87	CUST_71_PI429446423	CUST_71_PI429446423	FALSE									Mettl3	unmapped				CCATCTCTACGCCAGATGCACCTGC
286	95	85	CUST_53_PI429446426	CUST_53_PI429446426	FALSE									12Gtl2#1copy	unmapped				CGGCAAGCTGCTGATCGGTAACCCT
287	95	83	CUST_70_PI429446428	CUST_70_PI429446428	FALSE									13Gtl2#2copy	unmapped				GGGAAGAGGAGGTGGCCTTTGTTCT
288	95	81	CUST_248_PI429446423	CUST_248_PI429446423	FALSE									Mettl3	unmapped				GGGATATTCACATGGAGCTACCGTA
289	95	79	CUST_13_PI429446419	CUST_13_PI429446419	FALSE									#10	unmapped				CCGCGGCTGGCAGCGGAGGCCGGTG
290	95	77	CUST_105_PI429446417	CUST_105_PI429446417	FALSE									#3	unmapped				GCTCCGCCTCCTGGTGGCCGCTGCC
291	95	75	CUST_120_PI429446417	CUST_120_PI429446417	FALSE									#3	unmapped				TTTCCAGTTCCCGAGCCAAGTTGTG
292	95	73	CUST_20_PI429446421	CUST_20_PI429446421	FALSE									anti_actB	unmapped				AGGATTCCATACCCAAGAAGGAAGG
293	95	71	CUST_57_PI429446423	CUST_57_PI429446423	FALSE									Mettl3	unmapped				AAGAAGTTGCTACACCACCTCTCAG
294	95	69	CUST_10_PI429446433	CUST_10_PI429446433	FALSE									15Gtl2#6copy	unmapped				GCAAAGAGGAAGATGACAGTCATAA
295	95	67	CUST_30_PI429446419	CUST_30_PI429446419	FALSE									#10	unmapped				CAGCCGCAGCCGGGCTCTCGCACCA
296	95	65	CUST_123_PI429446426	CUST_123_PI429446426	FALSE									12Gtl2#1copy	unmapped				TTGATGGACATGTTGCCCCCTTTGC
297	95	63	CUST_288_PI429446423	CUST_288_PI429446423	FALSE									Mettl3	unmapped				CGCATCATTAGGACGGGCCGGACGG
298	95	61	CUST_2_PI429446430	CUST_2_PI429446430	FALSE									14Gtl2#4copy	unmapped				TATCCAGCCGTCGATGTGGTATTCG
299	95	59	CUST_121_PI429446423	CUST_121_PI429446423	FALSE									Mettl3	unmapped				AGTGACCACCTTTGCCAGCTCTTTA
300	95	57	CUST_316_PI429446423	CUST_316_PI429446423	FALSE									Mettl3	unmapped				TCATAAACCAGATGAAATATATGGC
301	95	55	CUST_14_PI429446417	CUST_14_PI429446417	FALSE									#3	unmapped				AGAGCCTCCGGGACGCGGAGCCAGC
302	95	53	CUST_124_PI429446423	CUST_124_PI429446423	FALSE									Mettl3	unmapped				CAGCTCTTTAGCATCTGGTCTGGCC
303	95	51	CUST_29_PI429446426	CUST_29_PI429446426	FALSE									12Gtl2#1copy	unmapped				ACATTCAGAAAGCTCTTTTTGATGC
304	95	49	CUST_178_PI429446423	CUST_178_PI429446423	FALSE									Mettl3	unmapped				GGAAGAGTGCATGAAAGCCAGTGAC
305	95	47	CUST_187_PI429446423	CUST_187_PI429446423	FALSE									Mettl3	unmapped				GCTGCACTTCAGACGAATTATCAAT
306	95	45	CUST_19_PI429446430	CUST_19_PI429446430	FALSE									14Gtl2#4copy	unmapped				AGTCCCTCTGTGGTGCCCTGGCCTT
307	95	43	CUST_15_PI429446423	CUST_15_PI429446423	FALSE									Mettl3	unmapped				GCCCATAAGAAACAGCTGGACTCGC
308	95	41	CUST_46_PI429446421	CUST_46_PI429446421	FALSE									anti_actB	unmapped				GGCCATCTCCTGCTCGAAGTCTAGA
309	95	39	CUST_154_PI429446423	CUST_154_PI429446423	FALSE									Mettl3	unmapped				GGTCAGTCAGGAGATCCTAGAGCTA
310	95	37	CUST_286_PI429446423	CUST_286_PI429446423	FALSE									Mettl3	unmapped				TCAGCTGCAGCGCATCATTAGGACG
311	95	35	CUST_12_PI429446426	CUST_12_PI429446426	FALSE									12Gtl2#1copy	unmapped				GAAGGCCTCTTTAGCTTGTCAGGGG
312	95	33	CUST_10_PI429446430	CUST_10_PI429446430	FALSE									14Gtl2#4copy	unmapped				TCCTGGCTAAATCTGGTGTGGTTCA
313	95	31	CUST_20_PI429446428	CUST_20_PI429446428	FALSE									13Gtl2#2copy	unmapped				TTGGCATTGCGCATGATGGCTGCGG
314	95	29	CUST_334_PI429446423	CUST_334_PI429446423	FALSE									Mettl3	unmapped				GCCCAACTGGATTACTCTTGGAAAC
315	95	27	CUST_43_PI429446423	CUST_43_PI429446423	FALSE									Mettl3	unmapped				TACCTCTAGCGGCCCTAAGCCCAGC
316	95	25	A_51_P426886	A_51_P426886	FALSE	NM_008155	NM_008155	14751	Gpi1	glucose phosphate isomerase 1	Mm.589	ENSMUST00000135243		ref|NM_008155|ens|ENSMUST00000135243|ens|ENSMUST00000038027|ref|XM_003689446	chr7:34987254-34987195	mm|7qB1	Mus musculus glucose phosphate isomerase 1 (Gpi1), mRNA [NM_008155]	GO:0001525(angiogenesis)|GO:0004347(glucose-6-phosphate isomerase activity)|GO:0005125(cytokine activity)|GO:0005515(protein binding)|GO:0005576(extracellular region)|GO:0005615(extracellular space)|GO:0005634(nucleus)|GO:0005737(cytoplasm)|GO:0005829(cytosol)|GO:0005886(plasma membrane)|GO:0005975(carbohydrate metabolic process)|GO:0006006(glucose metabolic process)|GO:0006094(gluconeogenesis)|G…	ATGGAAGGGCTTTGACGTGTCATGTTGTTCTGACCTGTATTTCACACCCCAGCTAGAATA
317	95	23	CUST_2_PI429446430	CUST_2_PI429446430	FALSE									14Gtl2#4copy	unmapped				TATCCAGCCGTCGATGTGGTATTCG
318	95	21	CUST_335_PI429446423	CUST_335_PI429446423	FALSE									Mettl3	unmapped				ACTGGATTACTCTTGGAAACCAACT
319	95	19	CUST_11_PI429446421	CUST_11_PI429446421	FALSE									anti_actB	unmapped				CGTCACACTTCATGATGGAATTGAA
320	95	17	CUST_70_PI429446417	CUST_70_PI429446417	FALSE									#3	unmapped				GCGGCGCGGTACTGCTGCGGCGTGC
321	95	15	CUST_212_PI429446423	CUST_212_PI429446423	FALSE									Mettl3	unmapped				ATTCTGAGAGTCCTGGCAGCAAGGA
322	95	13	CUST_348_PI429446423	CUST_348_PI429446423	FALSE									Mettl3	unmapped				TTTAAGCAAAGGTATCCGGACGGCA
323	95	11	CUST_35_PI429446433	CUST_35_PI429446433	FALSE									15Gtl2#6copy	unmapped				CCCCTCCCCTTCTCTCCTCTTCCCT
324	95	9	CUST_60_PI429446433	CUST_60_PI429446433	FALSE									15Gtl2#6copy	unmapped				CCCTTTCTTCTCTCTCCTCTCCTTT
325	95	7	CUST_157_PI429446423	CUST_157_PI429446423	FALSE									Mettl3	unmapped				CCTAGAGCTATTAAATACCACAACA
326	95	5	CUST_77_PI429446433	CUST_77_PI429446433	FALSE									15Gtl2#6copy	unmapped				CATTCGCACCGAGAAGCACCTGGCA
327	95	3	DarkCorner	DarkCorner	pos
328	95	1	DarkCorner	DarkCorner	pos
329	94	164	DarkCorner	DarkCorner	pos
330	94	162	CUST_58_PI429446428	CUST_58_PI429446428	FALSE									13Gtl2#2copy	unmapped				TATTGATGGCCGCAAGAGGGCGCTG
331	94	160	A_51_P209965	A_51_P209965	FALSE	NM_028070	NM_028070	72041	Alkbh4	alkB, alkylation repair homolog 4 (E. coli)	Mm.486605	ENSMUST00000041100		ref|NM_028070|ens|ENSMUST00000041100|ens|ENSMUST00000100568|gb|AK008083	chr5:136617257-136617316	mm|5qG2	Mus musculus alkB, alkylation repair homolog 4 (E. coli) (Alkbh4), mRNA [NM_028070]	GO:0005634(nucleus)|GO:0005737(cytoplasm)|GO:0005739(mitochondrion)|GO:0008150(biological_process)|GO:0016491(oxidoreductase activity)|GO:0016702(oxidoreductase activity, acting on single donors with incorporation of molecular oxygen, incorporation of two atoms of oxygen)|GO:0016706(oxidoreductase activity, acting on paired donors, with incorporation or reduction of molecular oxygen, 2-oxoglutara…	TGCGGCCATTCCTCAGCTCACTGAGTGTCATATGTGGAGGGATTGAGTTTTTTAGAACTT
332	94	158	CUST_39_PI429446428	CUST_39_PI429446428	FALSE									13Gtl2#2copy	unmapped				AAGCCCCCCCTGGCCGCCCCCTCCT
333	94	156	CUST_47_PI429446428	CUST_47_PI429446428	FALSE									13Gtl2#2copy	unmapped				GGCTGAGGGGGGGGGCAGCCTGAGG
334	94	154	CUST_348_PI429446423	CUST_348_PI429446423	FALSE									Mettl3	unmapped				TTTAAGCAAAGGTATCCGGACGGCA
335	94	152	(-)3xSLv1	(-)3xSLv1	neg
336	94	150	CUST_133_PI429446423	CUST_133_PI429446423	FALSE									Mettl3	unmapped				TAAGGAGCCGGCTAAGAAGTCAAGG
337	94	148	CUST_85_PI429446428	CUST_85_PI429446428	FALSE									13Gtl2#2copy	unmapped				TTACCTATGGGGAAATGTTAGTAGA
338	94	146	CUST_297_PI429446423	CUST_297_PI429446423	FALSE									Mettl3	unmapped				AAGGAACACTGCTTGGTTGGTGTTA
339	94	144	CUST_3_PI429446428	CUST_3_PI429446428	FALSE									13Gtl2#2copy	unmapped				AAGGAAAAGATAAAATGCAGAAAAG
340	94	142	CUST_93_PI429446417	CUST_93_PI429446417	FALSE									#3	unmapped				CCTCCTCCGGGAACCGCCTCTTGCC
341	94	140	CUST_13_PI429446421	CUST_13_PI429446421	FALSE									anti_actB	unmapped				CATGATGGAATTGAATGTAGTTTCA
342	94	138	CUST_68_PI429446417	CUST_68_PI429446417	FALSE									#3	unmapped				GTAGCTGCCGGCGGCGCGGTACTGC
343	94	136	CUST_112_PI429446417	CUST_112_PI429446417	FALSE									#3	unmapped				ACGCCCGGGGCCGCTACGCAACTGC
344	94	134	CUST_70_PI429446426	CUST_70_PI429446426	FALSE									12Gtl2#1copy	unmapped				CCTAGGCTTGCTGGCCATAGGGGGC
345	94	132	CUST_13_PI429446426	CUST_13_PI429446426	FALSE									12Gtl2#1copy	unmapped				CCTCTTTAGCTTGTCAGGGGCCTTC
346	94	130	A_51_P248819	A_51_P248819	FALSE	NM_026505	NM_026505	68010	Bambi	BMP and activin membrane-bound inhibitor	Mm.284863	ENSMUST00000025075		ref|NM_026505|ens|ENSMUST00000025075|gb|AK011305|gb|AK164632	chr18:3512455-3512514	mm|18qA1	Mus musculus BMP and activin membrane-bound inhibitor (Bambi), mRNA [NM_026505]	GO:0005109(frizzled binding)|GO:0005737(cytoplasm)|GO:0005886(plasma membrane)|GO:0007179(transforming growth factor beta receptor signaling pathway)|GO:0008284(positive regulation of cell proliferation)|GO:0008360(regulation of cell shape)|GO:0010718(positive regulation of epithelial to mesenchymal transition)|GO:0016020(membrane)|GO:0016021(integral to membrane)|GO:0016477(cell migration)|GO:00…	GGAGCACTTTTATCTGGAGACAACTAACTCGCTTAGTCATCTTGGAGAAACAAAATGACC
347	94	128	CUST_257_PI429446423	CUST_257_PI429446423	FALSE									Mettl3	unmapped				AGATGCGCAGGCTCAATATACCAGT
348	94	126	CUST_41_PI429446421	CUST_41_PI429446421	FALSE									anti_actB	unmapped				CCAGGGAGGAAGAGGATGCGGCAGT
349	94	124	CUST_13_PI429446423	CUST_13_PI429446423	FALSE									Mettl3	unmapped				CTCTATCCAGGCCCATAAGAAACAG
350	94	122	CUST_111_PI429446417	CUST_111_PI429446417	FALSE									#3	unmapped				TGCCGACGCCCGGGGCCGCTACGCA
351	94	120	CUST_57_PI429446430	CUST_57_PI429446430	FALSE									14Gtl2#4copy	unmapped				GTGCCAAGAACCAAGGGTCAATAGA
352	94	118	CUST_56_PI429446417	CUST_56_PI429446417	FALSE									#3	unmapped				CGCCTCGCCAGTCTCCGGGCTGGGC
353	94	116	CUST_47_PI429446426	CUST_47_PI429446426	FALSE									12Gtl2#1copy	unmapped				CCACCCCTGAAAAGGCCTGAGTCAC
354	94	114	CUST_88_PI429446430	CUST_88_PI429446430	FALSE									14Gtl2#4copy	unmapped				TTCTCTACACCAAATTCTGCTTTGG
355	94	112	CUST_18_PI429446433	CUST_18_PI429446433	FALSE									15Gtl2#6copy	unmapped				CATGTCTACCAAGACCACAGTTGCC
356	94	110	CUST_36_PI429446419	CUST_36_PI429446419	FALSE									#10	unmapped				GTGCGCGCGGAGCAGAGTGAGGGCA
357	94	108	CUST_87_PI429446423	CUST_87_PI429446423	FALSE									Mettl3	unmapped				GAGGTAAAGCGAGGTCTCCTCCAAG
358	94	106	CUST_82_PI429446433	CUST_82_PI429446433	FALSE									15Gtl2#6copy	unmapped				AGTGCAGCTGCATGCTCTTCTGAAC
359	94	104	CUST_227_PI429446423	CUST_227_PI429446423	FALSE									Mettl3	unmapped				CCAGTGCTGATCGACTCTTTCCACC
360	94	102	CUST_93_PI429446417	CUST_93_PI429446417	FALSE									#3	unmapped				CCTCCTCCGGGAACCGCCTCTTGCC
361	94	100	CUST_67_PI429446428	CUST_67_PI429446428	FALSE									13Gtl2#2copy	unmapped				GGGGCGGGGTGGGGAGGGAAGAGGA
362	94	98	CUST_185_PI429446423	CUST_185_PI429446423	FALSE									Mettl3	unmapped				CTTGTCGCAAGCTGCACTTCAGACG
363	94	96	CUST_59_PI429446426	CUST_59_PI429446426	FALSE									12Gtl2#1copy	unmapped				CAGCGGTGGCTTTTCTCAGTGCCTC
364	94	94	CUST_51_PI429446433	CUST_51_PI429446433	FALSE									15Gtl2#6copy	unmapped				CTCTTCCCTACACGTCTTTGCTTTT
365	94	92	CUST_16_PI429446430	CUST_16_PI429446430	FALSE									14Gtl2#4copy	unmapped				GCATGTTAGCGTCTAAGTCCCTCTG
366	94	90	CUST_18_PI429446421	CUST_18_PI429446421	FALSE									anti_actB	unmapped				TGGATGCCACAGGATTCCATACCCA
367	94	88	CUST_9_PI429446433	CUST_9_PI429446433	FALSE									15Gtl2#6copy	unmapped				CCCCAGCAAAGAGGAAGATGACAGT
368	94	86	CUST_89_PI429446426	CUST_89_PI429446426	FALSE									12Gtl2#1copy	unmapped				CTTCATGTCCTCCACAGGGCCTCTG
369	94	84	CUST_63_PI429446423	CUST_63_PI429446423	FALSE									Mettl3	unmapped				GCCTTGACCTTGCCCACTGATGCTG
370	94	82	(+)E1A_r60_3	(+)E1A_r60_3	pos
371	94	80	CUST_235_PI429446423	CUST_235_PI429446423	FALSE									Mettl3	unmapped				TGATATCCGCTACCTGGACGTCAGT
372	94	78	CUST_10_PI429446421	CUST_10_PI429446421	FALSE									anti_actB	unmapped				GTCAACGTCACACTTCATGATGGAA
373	94	76	CUST_141_PI429446423	CUST_141_PI429446423	FALSE									Mettl3	unmapped				GATGTTGATCTGGAGATAGAAAGCC
374	94	74	CUST_265_PI429446423	CUST_265_PI429446423	FALSE									Mettl3	unmapped				CTTTCTTTTCCTCTGGGTCACAGGA
375	94	72	CUST_106_PI429446433	CUST_106_PI429446433	FALSE									15Gtl2#6copy	unmapped				AGTCGCAGTGCAGACAACCGTGAGA
376	94	70	CUST_55_PI429446428	CUST_55_PI429446428	FALSE									13Gtl2#2copy	unmapped				GTTTCTAGAATGTTCTATTGATGGC
377	94	68	CUST_89_PI429446430	CUST_89_PI429446430	FALSE									14Gtl2#4copy	unmapped				TACACCAAATTCTGCTTTGGACTGA
378	94	66	CUST_89_PI429446430	CUST_89_PI429446430	FALSE									14Gtl2#4copy	unmapped				TACACCAAATTCTGCTTTGGACTGA
379	94	64	CUST_42_PI429446417	CUST_42_PI429446417	FALSE									#3	unmapped				TCGCCGCCGCCTCCTCCTGCAAGCC
380	94	62	A_51_P348334	A_51_P348334	FALSE	NM_011144	NM_011144	19013	Ppara	peroxisome proliferator activated receptor alpha	Mm.212789	ENSMUST00000057979		ref|NM_011144|ref|NM_001113418|ens|ENSMUST00000057979|ens|ENSMUST00000109423	chr15:85631955-85632014	mm|15qE2	Mus musculus peroxisome proliferator activated receptor alpha (Ppara), transcript variant 1, mRNA [NM_011144]	GO:0000122(negative regulation of transcription from RNA polymerase II promoter)|GO:0001103(RNA polymerase II repressing transcription factor binding)|GO:0001666(response to hypoxia)|GO:0003677(DNA binding)|GO:0003700(sequence-specific DNA binding transcription factor activity)|GO:0003707(steroid hormone receptor activity)|GO:0004872(receptor activity)|GO:0004879(ligand-activated sequence-specifi…	CAATGTTAATCAATGCACAGCACTCTACGTTGCGTTTATAATTCGCCATTAATTAACGGG
381	94	60	CUST_63_PI429446419	CUST_63_PI429446419	FALSE									#10	unmapped				CAGCAAGCAAGCAGGTCCTCAGCGC
382	94	58	CUST_120_PI429446426	CUST_120_PI429446426	FALSE									12Gtl2#1copy	unmapped				TTTTCGAGAGGACATTTGATGGACA
383	94	56	NA	NA	ignore
384	94	54	CUST_80_PI429446426	CUST_80_PI429446426	FALSE									12Gtl2#1copy	unmapped				TAAATAAGGCGGCGGCGGGGGGGTG
385	94	52	CUST_45_PI429446430	CUST_45_PI429446430	FALSE									14Gtl2#4copy	unmapped				ATGCTTCTTCAAGCTTGTGTTTCTG
386	94	50	CUST_159_PI429446423	CUST_159_PI429446423	FALSE									Mettl3	unmapped				TTAAATACCACAACAGCCAAGGAAC
387	94	48	CUST_11_PI429446428	CUST_11_PI429446428	FALSE									13Gtl2#2copy	unmapped				GTGGGGGGTGATCTGAGTGCTGGAA
388	94	46	CUST_204_PI429446423	CUST_204_PI429446423	FALSE									Mettl3	unmapped				ACCTGCAAATATGTTCACTATGAAA
389	94	44	CUST_102_PI429446433	CUST_102_PI429446433	FALSE									15Gtl2#6copy	unmapped				GACTTTGGCATGTGTGATTGAGTCG
390	94	42	CUST_16_PI429446428	CUST_16_PI429446428	FALSE									13Gtl2#2copy	unmapped				ATTTGGAGGCAGGGTTCTTTTTGGC
391	94	40	CUST_84_PI429446423	CUST_84_PI429446423	FALSE									Mettl3	unmapped				GCCCAGGAGTTGATTGAGGTAAAGC
392	94	38	CUST_79_PI429446417	CUST_79_PI429446417	FALSE									#3	unmapped				GTCGCCAGCGGCCTCTCGGAGAAGC
393	94	36	CUST_16_PI429446426	CUST_16_PI429446426	FALSE									12Gtl2#1copy	unmapped				AGGGGCCTTCTTTTGGGGGGCTCTT
394	94	34	CUST_7_PI429446426	CUST_7_PI429446426	FALSE									12Gtl2#1copy	unmapped				CTGCATAATGACGTCTGTGGCTGGA
395	94	32	CUST_104_PI429446433	CUST_104_PI429446433	FALSE									15Gtl2#6copy	unmapped				TGTGTGATTGAGTCGCAGTGCAGAC
396	94	30	CUST_48_PI429446428	CUST_48_PI429446428	FALSE									13Gtl2#2copy	unmapped				AGGGGGGGGGCAGCCTGAGGGCTGC
397	94	28	CUST_87_PI429446423	CUST_87_PI429446423	FALSE									Mettl3	unmapped				GAGGTAAAGCGAGGTCTCCTCCAAG
398	94	26	CUST_49_PI429446419	CUST_49_PI429446419	FALSE									#10	unmapped				TGGCGCCGGGTGGACGGCTCGGTGG
399	94	24	CUST_58_PI429446426	CUST_58_PI429446426	FALSE									12Gtl2#1copy	unmapped				GGGCTCAGCGGTGGCTTTTCTCAGT
400	94	22	CUST_35_PI429446426	CUST_35_PI429446426	FALSE									12Gtl2#1copy	unmapped				AAGCCCTAAACCTTCATTTTCACCC
401	94	20	CUST_8_PI429446433	CUST_8_PI429446433	FALSE									15Gtl2#6copy	unmapped				CATTACCCCAGCAAAGAGGAAGATG
402	94	18	CUST_103_PI429446426	CUST_103_PI429446426	FALSE									12Gtl2#1copy	unmapped				CAGACGCTTCTTCTTTGGACTCACA
403	94	16	CUST_183_PI429446423	CUST_183_PI429446423	FALSE									Mettl3	unmapped				GCTGACCGGCCTTGTCGCAAGCTGC
404	94	14	CUST_304_PI429446423	CUST_304_PI429446423	FALSE									Mettl3	unmapped				TCAAGGATTCAACCAGGGCCTGGAC
405	94	12	NA	NA	ignore
406	94	10	(+)eQC-41	(+)eQC-41	pos
407	94	8	CUST_113_PI429446423	CUST_113_PI429446423	FALSE									Mettl3	unmapped				TCGCAGGGCAGAAACGGCGTGCAGA
408	94	6	CUST_37_PI429446417	CUST_37_PI429446417	FALSE									#3	unmapped				TCGGCCGTGCCCCCTGCGCCGTCTG
409	94	4	CUST_53_PI429446423	CUST_53_PI429446423	FALSE									Mettl3	unmapped				CTACAGACCCTGAGTTAGAGAAGAA
410	94	2	DarkCorner	DarkCorner	pos
411	94	163	CUST_107_PI429446423	CUST_107_PI429446423	FALSE									Mettl3	unmapped				AGAAAGGTCTTGGAGAGGTAGCAGG
412	94	161	CUST_48_PI429446430	CUST_48_PI429446430	FALSE									14Gtl2#4copy	unmapped				TGTGTTTCTGTGTATGTGGTGTGTG
413	94	159	CUST_77_PI429446417	CUST_77_PI429446417	FALSE									#3	unmapped				CTCCTTGGAGGTCGCCAGCGGCCTC
414	94	157	CUST_278_PI429446423	CUST_278_PI429446423	FALSE									Mettl3	unmapped				GTTATGAACGGGTGGATGAAATCAT
415	94	155	CUST_16_PI429446417	CUST_16_PI429446417	FALSE									#3	unmapped				GGACGCGGAGCCAGCAACTTCTCGG
416	94	153	CUST_100_PI429446433	CUST_100_PI429446433	FALSE									15Gtl2#6copy	unmapped				CCATGATGGGGACTTTGGCATGTGT
417	94	151	CUST_55_PI429446433	CUST_55_PI429446433	FALSE									15Gtl2#6copy	unmapped				CTTTTTCTTTTGATTCTTCATCTTC
418	94	149	CUST_243_PI429446423	CUST_243_PI429446423	FALSE									Mettl3	unmapped				GCAGTTGTGATGGCTGACCCACCTT
419	94	147	CUST_36_PI429446426	CUST_36_PI429446426	FALSE									12Gtl2#1copy	unmapped				CTAAACCTTCATTTTCACCCTCCGA
420	94	145	CUST_11_PI429446428	CUST_11_PI429446428	FALSE									13Gtl2#2copy	unmapped				GTGGGGGGTGATCTGAGTGCTGGAA
421	94	143	CUST_163_PI429446423	CUST_163_PI429446423	FALSE									Mettl3	unmapped				GGAACAGTCCATTGTTGAAAAGTTT
422	94	141	CUST_346_PI429446423	CUST_346_PI429446423	FALSE									Mettl3	unmapped				GGTTGCCAGGTTTAAGCAAAGGTAT
423	94	139	CUST_37_PI429446423	CUST_37_PI429446423	FALSE									Mettl3	unmapped				CCGTAGTGATAGTCCCGTGCCTACT
424	94	137	CUST_349_PI429446423	CUST_349_PI429446423	FALSE									Mettl3	unmapped				GCAAAGGTATCCGGACGGCATCATC
425	94	135	A_51_P191669	A_51_P191669	FALSE	NM_007694	NM_007694	12653	Chgb	chromogranin B	Mm.255241	ENSMUST00000028826		ref|NM_007694|ens|ENSMUST00000028826|gb|AK133786|gb|AK158857	chr2:132620703-132620762	mm|2qF2	Mus musculus chromogranin B (Chgb), mRNA [NM_007694]	GO:0005515(protein binding)|GO:0005576(extracellular region)|GO:0030141(secretory granule)	TAGCGTGACTTGTAGCGTATTCTTCCTGCAAAATAGATGTTTCACGTGTCTGTGACAATG
426	94	133	CUST_52_PI429446419	CUST_52_PI429446419	FALSE									#10	unmapped				GGCTCGGTGGAGGGGAGCGGAGTGG
427	94	131	CUST_66_PI429446423	CUST_66_PI429446423	FALSE									Mettl3	unmapped				ACTGATGCTGTTTCCATCCGTCTTG
428	94	129	CUST_27_PI429446419	CUST_27_PI429446419	FALSE									#10	unmapped				GCGCAAGTCAGGCAGCAGCCGCAGC
429	94	127	CUST_8_PI429446428	CUST_8_PI429446428	FALSE									13Gtl2#2copy	unmapped				GGGGTGTGTGGAGGTGTGGGGGGTG
430	94	125	CUST_210_PI429446423	CUST_210_PI429446423	FALSE									Mettl3	unmapped				GCTTGTGTTGATTCTGAGAGTCCTG
431	94	123	CUST_32_PI429446423	CUST_32_PI429446423	FALSE									Mettl3	unmapped				CAGAAGCGGCACTGTCCCCAACCTT
432	94	121	CUST_63_PI429446426	CUST_63_PI429446426	FALSE									12Gtl2#1copy	unmapped				GCCTCTCAGCCCCAGGACCCGAGTC
433	94	119	CUST_54_PI429446419	CUST_54_PI429446419	FALSE									#10	unmapped				AGGGGAGCGGAGTGGAGCACGCGGG
434	94	117	CUST_70_PI429446428	CUST_70_PI429446428	FALSE									13Gtl2#2copy	unmapped				GGGAAGAGGAGGTGGCCTTTGTTCT
435	94	115	CUST_50_PI429446430	CUST_50_PI429446430	FALSE									14Gtl2#4copy	unmapped				TGTATGTGGTGTGTGCATATCTGCC
436	94	113	CUST_57_PI429446433	CUST_57_PI429446433	FALSE									15Gtl2#6copy	unmapped				TGATTCTTCATCTTCCCCTTTCTTC
437	94	111	CUST_351_PI429446423	CUST_351_PI429446423	FALSE									Mettl3	unmapped				CCGGACGGCATCATCTCTAAACCTA
438	94	109	CUST_19_PI429446419	CUST_19_PI429446419	FALSE									#10	unmapped				GCGCTCCGTGTAGACGCCGCACGCG
439	94	107	CUST_87_PI429446428	CUST_87_PI429446428	FALSE									13Gtl2#2copy	unmapped				GGAAATGTTAGTAGATACCTGGATT
440	94	105	CUST_241_PI429446423	CUST_241_PI429446423	FALSE									Mettl3	unmapped				GGGCAAATTTGCAGTTGTGATGGCT
441	94	103	CUST_76_PI429446428	CUST_76_PI429446428	FALSE									13Gtl2#2copy	unmapped				AGGAGGGGGTCGGGAGCGAGATGGG
442	94	101	CUST_54_PI429446426	CUST_54_PI429446426	FALSE									12Gtl2#1copy	unmapped				AGCTGCTGATCGGTAACCCTGGGCT
443	94	99	CUST_56_PI429446430	CUST_56_PI429446430	FALSE									14Gtl2#4copy	unmapped				GGACAGTGCCAAGAACCAAGGGTCA
444	94	97	CUST_85_PI429446417	CUST_85_PI429446417	FALSE									#3	unmapped				CGGCCGCCCGCCAGCCCCGCGCCGC
445	94	95	CUST_29_PI429446426	CUST_29_PI429446426	FALSE									12Gtl2#1copy	unmapped				ACATTCAGAAAGCTCTTTTTGATGC
446	94	93	CUST_111_PI429446426	CUST_111_PI429446426	FALSE									12Gtl2#1copy	unmapped				TCACCCCAAGATAGATCCTTCGTCC
447	94	91	CUST_7_PI429446426	CUST_7_PI429446426	FALSE									12Gtl2#1copy	unmapped				CTGCATAATGACGTCTGTGGCTGGA
448	94	89	CUST_125_PI429446417	CUST_125_PI429446417	FALSE									#3	unmapped				GAAGTCCGTGGACGGCTTGGCGCTG
449	94	87	CUST_137_PI429446423	CUST_137_PI429446423	FALSE									Mettl3	unmapped				CAAGGAAGCACGCTGCCTCCGATGT
450	94	85	CUST_99_PI429446433	CUST_99_PI429446433	FALSE									15Gtl2#6copy	unmapped				ACCAGCCATGATGGGGACTTTGGCA
451	94	83	CUST_13_PI429446428	CUST_13_PI429446428	FALSE									13Gtl2#2copy	unmapped				ATCTGAGTGCTGGAAATTTGGAGGC
452	94	81	CUST_187_PI429446423	CUST_187_PI429446423	FALSE									Mettl3	unmapped				GCTGCACTTCAGACGAATTATCAAT
453	94	79	CUST_61_PI429446419	CUST_61_PI429446419	FALSE									#10	unmapped				GGGATGGGAGCAGCAAGCAAGCAGG
454	94	77	CUST_33_PI429446419	CUST_33_PI429446419	FALSE									#10	unmapped				TCTCGCACCAGCTCCGTGCGCGCGG
455	94	75	CUST_107_PI429446426	CUST_107_PI429446426	FALSE									12Gtl2#1copy	unmapped				TCACAGTTGCCACCCACCTGTCACC
456	94	73	CUST_6_PI429446419	CUST_6_PI429446419	FALSE									#10	unmapped				TTCAGCAGCGCCCTCAGCGGGTACT
457	94	71	CUST_350_PI429446423	CUST_350_PI429446423	FALSE									Mettl3	unmapped				GGTATCCGGACGGCATCATCTCTAA
458	94	69	CUST_86_PI429446423	CUST_86_PI429446423	FALSE									Mettl3	unmapped				TGATTGAGGTAAAGCGAGGTCTCCT
459	94	67	CUST_55_PI429446433	CUST_55_PI429446433	FALSE									15Gtl2#6copy	unmapped				CTTTTTCTTTTGATTCTTCATCTTC
460	94	65	CUST_47_PI429446433	CUST_47_PI429446433	FALSE									15Gtl2#6copy	unmapped				GACTTTTCTTCTTCCTCTGCCTCTT
461	94	63	CUST_44_PI429446426	CUST_44_PI429446426	FALSE									12Gtl2#1copy	unmapped				ACCTTAACAACGCCCCCACCCCTGA
462	94	61	CUST_50_PI429446428	CUST_50_PI429446428	FALSE									13Gtl2#2copy	unmapped				CAGCCTGAGGGCTGCGACGTGGCAG
463	94	59	CUST_44_PI429446430	CUST_44_PI429446430	FALSE									14Gtl2#4copy	unmapped				GGTAGATGCTTCTTCAAGCTTGTGT
464	94	57	(-)3xSLv1	(-)3xSLv1	neg
465	94	55	CUST_17_PI429446419	CUST_17_PI429446419	FALSE									#10	unmapped				CGGTGCCACAGCGCTCCGTGTAGAC
466	94	53	(+)E1A_r60_a135	(+)E1A_r60_a135	pos
467	94	51	NA	NA	ignore
468	94	49	CUST_12_PI429446417	CUST_12_PI429446417	FALSE									#3	unmapped				GTCCGGGCAGAGAGCCTCCGGGACG
469	94	47	CUST_81_PI429446428	CUST_81_PI429446428	FALSE									13Gtl2#2copy	unmapped				TTGCGGGACCATGGGTTCATTTACC
470	94	45	CUST_220_PI429446423	CUST_220_PI429446423	FALSE									Mettl3	unmapped				GGAGCTTGCTCTTACACAGAGTGTT
471	94	43	RC6	RC6	pos
472	94	41	CUST_71_PI429446430	CUST_71_PI429446430	FALSE									14Gtl2#4copy	unmapped				CTCACTTTTAGCTGGTAGGTCTGGG
473	94	39	CUST_29_PI429446428	CUST_29_PI429446428	FALSE									13Gtl2#2copy	unmapped				GGCTTTTGACTTTTGGTAAATCACC
474	94	37	CUST_194_PI429446423	CUST_194_PI429446423	FALSE									Mettl3	unmapped				ATGAATCTTTAGGTGACTGCTCTTT
475	94	35	CUST_39_PI429446433	CUST_39_PI429446433	FALSE									15Gtl2#6copy	unmapped				TCCCTCTTTTCATCCTTTTTCTTCC
476	94	33	CUST_26_PI429446428	CUST_26_PI429446428	FALSE									13Gtl2#2copy	unmapped				TTCTGACGTGTTGAAGGCTTTTGAC
477	94	31	NA	NA	ignore
478	94	29	CUST_128_PI429446423	CUST_128_PI429446423	FALSE									Mettl3	unmapped				TGGCCTCTTCAGCATCAGAACCAGC
479	94	27	CUST_27_PI429446430	CUST_27_PI429446430	FALSE									14Gtl2#4copy	unmapped				ATGGTGGCTGGTGCTGCTGGTTGTG
480	94	25	A_51_P406105	A_51_P406105	FALSE	NR_003634	NR_003634	66184	Rps4y2	ribosomal protein S4, Y-linked 2	Mm.391542	ENSMUST00000071745		ref|NR_003634|ens|ENSMUST00000071745|gb|AK012382|gb|AK004068	chr6:148304018-148304077	mm|6qG3	Mus musculus ribosomal protein S4, Y-linked 2 (Rps4y2), non-coding RNA [NR_003634]	GO:0003674(molecular_function)|GO:0005575(cellular_component)|GO:0005840(ribosome)|GO:0008150(biological_process)	TGAAGTGGACTCTGAGGGACATTGCGGGGAAGGGGCGTTTACGTTTGTTTATACTTAAAA
481	94	23	CUST_39_PI429446428	CUST_39_PI429446428	FALSE									13Gtl2#2copy	unmapped				AAGCCCCCCCTGGCCGCCCCCTCCT
482	94	21	CUST_12_PI429446430	CUST_12_PI429446430	FALSE									14Gtl2#4copy	unmapped				ATCTGGTGTGGTTCATTCATGCATG
483	94	19	CUST_12_PI429446430	CUST_12_PI429446430	FALSE									14Gtl2#4copy	unmapped				ATCTGGTGTGGTTCATTCATGCATG
484	94	17	CUST_27_PI429446417	CUST_27_PI429446417	FALSE									#3	unmapped				ACGAGCCGTTGCTGCCGCCGCCGGC
485	94	15	CUST_2_PI429446433	CUST_2_PI429446433	FALSE									15Gtl2#6copy	unmapped				GAGTTTTGGTAGAGCAGATGGTAAC
486	94	13	CUST_245_PI429446423	CUST_245_PI429446423	FALSE									Mettl3	unmapped				TGGCTGACCCACCTTGGGATATTCA
487	94	11	CUST_42_PI429446419	CUST_42_PI429446419	FALSE									#10	unmapped				CGCAGCCGCCCAGAGCGCGGGGCGC
488	94	9	CUST_281_PI429446423	CUST_281_PI429446423	FALSE									Mettl3	unmapped				ATGAAATCATCTGGGTGAAGACTAA
489	94	7	CUST_69_PI429446426	CUST_69_PI429446426	FALSE									12Gtl2#1copy	unmapped				GGCATCCTAGGCTTGCTGGCCATAG
490	94	5	CUST_66_PI429446426	CUST_66_PI429446426	FALSE									12Gtl2#1copy	unmapped				GACCCGAGTCACAGTGGCATCCTAG
491	94	3	CUST_38_PI429446433	CUST_38_PI429446433	FALSE									15Gtl2#6copy	unmapped				CCTCTTCCCTCTTTTCATCCTTTTT
492	94	1	DarkCorner	DarkCorner	pos
493	93	164	NA	NA	ignore
494	93	162	CUST_75_PI429446428	CUST_75_PI429446428	FALSE									13Gtl2#2copy	unmapped				CCTGCAGGAGGGGGTCGGGAGCGAG
495	93	160	CUST_64_PI429446419	CUST_64_PI429446419	FALSE									#10	unmapped				AGCAAGCAGGTCCTCAGCGCCCAGT
496	93	158	CUST_69_PI429446417	CUST_69_PI429446417	FALSE									#3	unmapped				TGCCGGCGGCGCGGTACTGCTGCGG
497	93	156	CUST_203_PI429446423	CUST_203_PI429446423	FALSE									Mettl3	unmapped				TGGACACCTGCAAATATGTTCACTA
498	93	154	(+)E1A_r60_1	(+)E1A_r60_1	pos
499	93	152	CUST_100_PI429446423	CUST_100_PI429446423	FALSE									Mettl3	unmapped				CAAGCTGTCTGCCATGATGGGGGCT
500	93	150	CUST_70_PI429446423	CUST_70_PI429446423	FALSE									Mettl3	unmapped				TCTTGCCATCTCTACGCCAGATGCA
501	93	148	RC5	RC5	pos
502	93	146	CUST_106_PI429446417	CUST_106_PI429446417	FALSE									#3	unmapped				GCCTCCTGGTGGCCGCTGCCGCCAC
503	93	144	NA	NA	ignore
504	93	142	CUST_30_PI429446433	CUST_30_PI429446433	FALSE									15Gtl2#6copy	unmapped				ATTGCCACTGCCACCGCCACCGTCA
505	93	140	CUST_345_PI429446423	CUST_345_PI429446423	FALSE									Mettl3	unmapped				GATGTGGTTGCCAGGTTTAAGCAAA
506	93	138	CUST_106_PI429446423	CUST_106_PI429446423	FALSE									Mettl3	unmapped				AGAAAAGAAAGGTCTTGGAGAGGTA
507	93	136	CUST_70_PI429446426	CUST_70_PI429446426	FALSE									12Gtl2#1copy	unmapped				CCTAGGCTTGCTGGCCATAGGGGGC
508	93	134	RC7	RC7	pos
509	93	132	CUST_70_PI429446428	CUST_70_PI429446428	FALSE									13Gtl2#2copy	unmapped				GGGAAGAGGAGGTGGCCTTTGTTCT
510	93	130	CUST_4_PI429446419	CUST_4_PI429446419	FALSE									#10	unmapped				CCCGCGGCCATTCAGCAGCGCCCTC
511	93	128	CUST_248_PI429446423	CUST_248_PI429446423	FALSE									Mettl3	unmapped				GGGATATTCACATGGAGCTACCGTA
512	93	126	CUST_30_PI429446426	CUST_30_PI429446426	FALSE									12Gtl2#1copy	unmapped				CAGAAAGCTCTTTTTGATGCCCCCA
513	93	124	CUST_55_PI429446417	CUST_55_PI429446417	FALSE									#3	unmapped				CGCTTCGCCTCGCCAGTCTCCGGGC
514	93	122	CUST_54_PI429446426	CUST_54_PI429446426	FALSE									12Gtl2#1copy	unmapped				AGCTGCTGATCGGTAACCCTGGGCT
515	93	120	CUST_319_PI429446423	CUST_319_PI429446423	FALSE									Mettl3	unmapped				AATATATGGCATGATTGAGAGACTG
516	93	118	CUST_44_PI429446430	CUST_44_PI429446430	FALSE									14Gtl2#4copy	unmapped				GGTAGATGCTTCTTCAAGCTTGTGT
517	93	116	CUST_55_PI429446433	CUST_55_PI429446433	FALSE									15Gtl2#6copy	unmapped				CTTTTTCTTTTGATTCTTCATCTTC
518	93	114	CUST_45_PI429446421	CUST_45_PI429446421	FALSE									anti_actB	unmapped				GCAGTGGCCATCTCCTGCTCGAAGT
519	93	112	CUST_49_PI429446433	CUST_49_PI429446433	FALSE									15Gtl2#6copy	unmapped				CTTCCTCTGCCTCTTCCCTACACGT
520	93	110	CUST_28_PI429446430	CUST_28_PI429446430	FALSE									14Gtl2#4copy	unmapped				GGCTGGTGCTGCTGGTTGTGTGAAG
521	93	108	CUST_63_PI429446428	CUST_63_PI429446428	FALSE									13Gtl2#2copy	unmapped				GTGGCACTGCGGAATTTTGGGGGGC
522	93	106	CUST_73_PI429446433	CUST_73_PI429446433	FALSE									15Gtl2#6copy	unmapped				TCCTCCTTTTCCCACTTCCTCATTC
523	93	104	CUST_11_PI429446417	CUST_11_PI429446417	FALSE									#3	unmapped				CAGCCGTCCGGGCAGAGAGCCTCCG
524	93	102	CUST_63_PI429446419	CUST_63_PI429446419	FALSE									#10	unmapped				CAGCAAGCAAGCAGGTCCTCAGCGC
525	93	100	CUST_61_PI429446426	CUST_61_PI429446426	FALSE									12Gtl2#1copy	unmapped				TTTTCTCAGTGCCTCTCAGCCCCAG
526	93	98	CUST_5_PI429446417	CUST_5_PI429446417	FALSE									#3	unmapped				GGCGCTGCCGCGCGCGGGGCTCCCG
527	93	96	CUST_79_PI429446430	CUST_79_PI429446430	FALSE									14Gtl2#4copy	unmapped				CCGCTCCCCCTTTCTTCCCCTGCCA
528	93	94	CUST_9_PI429446433	CUST_9_PI429446433	FALSE									15Gtl2#6copy	unmapped				CCCCAGCAAAGAGGAAGATGACAGT
529	93	92	CUST_213_PI429446423	CUST_213_PI429446423	FALSE									Mettl3	unmapped				GAGAGTCCTGGCAGCAAGGAGCATA
530	93	90	CUST_117_PI429446423	CUST_117_PI429446423	FALSE									Mettl3	unmapped				GCAGAACAGGATTTGACTACAGTGA
531	93	88	CUST_46_PI429446426	CUST_46_PI429446426	FALSE									12Gtl2#1copy	unmapped				CGCCCCCACCCCTGAAAAGGCCTGA
532	93	86	CUST_52_PI429446417	CUST_52_PI429446417	FALSE									#3	unmapped				TCCACGAAGGCGCTACGCTTCGCCT
533	93	84	CUST_43_PI429446423	CUST_43_PI429446423	FALSE									Mettl3	unmapped				TACCTCTAGCGGCCCTAAGCCCAGC
534	93	82	CUST_90_PI429446430	CUST_90_PI429446430	FALSE									14Gtl2#4copy	unmapped				CAAATTCTGCTTTGGACTGAGCTTA
535	93	80	CUST_37_PI429446423	CUST_37_PI429446423	FALSE									Mettl3	unmapped				CCGTAGTGATAGTCCCGTGCCTACT
536	93	78	CUST_30_PI429446423	CUST_30_PI429446423	FALSE									Mettl3	unmapped				TTAAGGAACCCAGAAGCGGCACTGT
537	93	76	CUST_24_PI429446417	CUST_24_PI429446417	FALSE									#3	unmapped				CCGCCGCGGGGGTGGACGAGCCGTT
538	93	74	CUST_60_PI429446417	CUST_60_PI429446417	FALSE									#3	unmapped				TGGGCGGCGCGAAGAGCCGGCCGTT
539	93	72	CUST_150_PI429446423	CUST_150_PI429446423	FALSE									Mettl3	unmapped				AAAGAACAGCAGAGCAAGAAGGTCA
540	93	70	CUST_68_PI429446423	CUST_68_PI429446423	FALSE									Mettl3	unmapped				TTTCCATCCGTCTTGCCATCTCTAC
541	93	68	CUST_54_PI429446419	CUST_54_PI429446419	FALSE									#10	unmapped				AGGGGAGCGGAGTGGAGCACGCGGG
542	93	66	A_51_P349205	A_51_P349205	FALSE	NM_010777	NM_010777	17196	Mbp	myelin basic protein	Mm.252063			ref|NM_010777|ref|NM_001025251|ref|NM_001025255|ref|NM_001025258	chr18:82754755-82754814	mm|18qE3	Mus musculus myelin basic protein (Mbp), transcript variant 7, mRNA [NM_010777]	GO:0002020(protease binding)|GO:0005634(nucleus)|GO:0005737(cytoplasm)|GO:0005886(plasma membrane)|GO:0009636(response to toxin)|GO:0016020(membrane)|GO:0019911(structural constituent of myelin sheath)|GO:0033269(internode region of axon)|GO:0042552(myelination)|GO:0042995(cell projection)|GO:0043025(neuronal cell body)|GO:0043209(myelin sheath)|GO:0043218(compact myelin)|GO:0050771(negative regu…	CATCTTGTTAATCTGTTCTAACTCCGAGTAGAGTGTGGGTTTAAGATAACACCGATTAAT
543	93	64	CUST_123_PI429446426	CUST_123_PI429446426	FALSE									12Gtl2#1copy	unmapped				TTGATGGACATGTTGCCCCCTTTGC
544	93	62	CUST_32_PI429446423	CUST_32_PI429446423	FALSE									Mettl3	unmapped				CAGAAGCGGCACTGTCCCCAACCTT
545	93	60	(+)E1A_r60_a107	(+)E1A_r60_a107	pos
546	93	58	CUST_273_PI429446423	CUST_273_PI429446423	FALSE									Mettl3	unmapped				GGCAGAGAATGTCTGAACCTCTGGG
547	93	56	CUST_25_PI429446417	CUST_25_PI429446417	FALSE									#3	unmapped				GCGGGGGTGGACGAGCCGTTGCTGC
548	93	54	CUST_23_PI429446433	CUST_23_PI429446433	FALSE									15Gtl2#6copy	unmapped				ACACAGTGACCAGCATCTACTAAGA
549	93	52	CUST_72_PI429446426	CUST_72_PI429446426	FALSE									12Gtl2#1copy	unmapped				CTGGCCATAGGGGGCTTACGCGAAA
550	93	50	CUST_26_PI429446417	CUST_26_PI429446417	FALSE									#3	unmapped				GGTGGACGAGCCGTTGCTGCCGCCG
551	93	48	CUST_81_PI429446426	CUST_81_PI429446426	FALSE									12Gtl2#1copy	unmapped				AAGGCGGCGGCGGGGGGGTGGGGGT
552	93	46	CUST_44_PI429446426	CUST_44_PI429446426	FALSE									12Gtl2#1copy	unmapped				ACCTTAACAACGCCCCCACCCCTGA
553	93	44	CUST_265_PI429446423	CUST_265_PI429446423	FALSE									Mettl3	unmapped				CTTTCTTTTCCTCTGGGTCACAGGA
554	93	42	CUST_7_PI429446428	CUST_7_PI429446428	FALSE									13Gtl2#2copy	unmapped				AAAAGGGGGTGTGTGGAGGTGTGGG
555	93	40	CUST_90_PI429446417	CUST_90_PI429446417	FALSE									#3	unmapped				CGCCCTCCGCCGCCGCCTCCTCCGG
556	93	38	CUST_51_PI429446426	CUST_51_PI429446426	FALSE									12Gtl2#1copy	unmapped				GTCACCTCGCCGGCAAGCTGCTGAT
557	93	36	CUST_250_PI429446423	CUST_250_PI429446423	FALSE									Mettl3	unmapped				CATGGAGCTACCGTATGGGACATTA
558	93	34	CUST_44_PI429446426	CUST_44_PI429446426	FALSE									12Gtl2#1copy	unmapped				ACCTTAACAACGCCCCCACCCCTGA
559	93	32	CUST_119_PI429446417	CUST_119_PI429446417	FALSE									#3	unmapped				GGAGTTTTCCAGTTCCCGAGCCAAG
560	93	30	CUST_24_PI429446426	CUST_24_PI429446426	FALSE									12Gtl2#1copy	unmapped				TTTTCTTTCTCTCCCAGTATCTGAC
561	93	28	CUST_75_PI429446417	CUST_75_PI429446417	FALSE									#3	unmapped				ACACCAACTCCTCCTTGGAGGTCGC
562	93	26	CUST_313_PI429446423	CUST_313_PI429446423	FALSE									Mettl3	unmapped				GGTTCGTTCCACCAGTCATAAACCA
563	93	24	CUST_117_PI429446417	CUST_117_PI429446417	FALSE									#3	unmapped				TGCTTCCCCGGGAGTTTTCCAGTTC
564	93	22	CUST_207_PI429446423	CUST_207_PI429446423	FALSE									Mettl3	unmapped				CACTATGAAATTGATGCTTGTGTTG
565	93	20	CUST_47_PI429446433	CUST_47_PI429446433	FALSE									15Gtl2#6copy	unmapped				GACTTTTCTTCTTCCTCTGCCTCTT
566	93	18	A_51_P475138	A_51_P475138	FALSE	NM_001099297	NM_001099297	99439	Duox1	dual oxidase 1	Mm.108582	ENSMUST00000099461		ref|NM_001099297|ens|ENSMUST00000099461|gb|AK037033|tc|TC1601504	chr2:122173491-122173550	mm|2qE5	Mus musculus dual oxidase 1 (Duox1), mRNA [NM_001099297]	GO:0005515(protein binding)|GO:0005886(plasma membrane)|GO:0016020(membrane)|GO:0016021(integral to membrane)|GO:0016491(oxidoreductase activity)|GO:0019221(cytokine-mediated signaling pathway)|GO:0042335(cuticle development)|GO:0051591(response to cAMP)|GO:0055114(oxidation-reduction process)|GO:0072593(reactive oxygen species metabolic process)	TGTGTTCTTCCTCTCTTCAAAATGGTTGGGAGATGTCTTAGAGTAGCCAGGGGCAACTTA
567	93	16	CUST_25_PI429446433	CUST_25_PI429446433	FALSE									15Gtl2#6copy	unmapped				CAGCATCTACTAAGATCACTGCTGC
568	93	14	CUST_51_PI429446433	CUST_51_PI429446433	FALSE									15Gtl2#6copy	unmapped				CTCTTCCCTACACGTCTTTGCTTTT
569	93	12	CUST_59_PI429446423	CUST_59_PI429446423	FALSE									Mettl3	unmapped				TACACCACCTCTCAGATCTGGCCTT
570	93	10	CUST_71_PI429446430	CUST_71_PI429446430	FALSE									14Gtl2#4copy	unmapped				CTCACTTTTAGCTGGTAGGTCTGGG
571	93	8	CUST_60_PI429446423	CUST_60_PI429446423	FALSE									Mettl3	unmapped				CACCTCTCAGATCTGGCCTTGACCT
572	93	6	CUST_31_PI429446423	CUST_31_PI429446423	FALSE									Mettl3	unmapped				GAACCCAGAAGCGGCACTGTCCCCA
573	93	4	CUST_309_PI429446423	CUST_309_PI429446423	FALSE									Mettl3	unmapped				TGCGATGTGATTGTAGCTGAGGTTC
574	93	2	CUST_88_PI429446423	CUST_88_PI429446423	FALSE									Mettl3	unmapped				AAAGCGAGGTCTCCTCCAAGATGAT
575	93	163	CUST_16_PI429446419	CUST_16_PI429446419	FALSE									#10	unmapped				GAGGCCGGTGCCACAGCGCTCCGTG
576	93	161	CUST_228_PI429446423	CUST_228_PI429446423	FALSE									Mettl3	unmapped				GCTGATCGACTCTTTCCACCTCAGT
577	93	159	CUST_94_PI429446426	CUST_94_PI429446426	FALSE									12Gtl2#1copy	unmapped				ACTTTCCTTTTAGGGTCTCAATCAT
578	93	157	CUST_256_PI429446423	CUST_256_PI429446423	FALSE									Mettl3	unmapped				TGATGAGATGCGCAGGCTCAATATA
579	93	155	CUST_68_PI429446423	CUST_68_PI429446423	FALSE									Mettl3	unmapped				TTTCCATCCGTCTTGCCATCTCTAC
580	93	153	CUST_46_PI429446433	CUST_46_PI429446433	FALSE									15Gtl2#6copy	unmapped				CTTCTGACTTTTCTTCTTCCTCTGC
581	93	151	CUST_327_PI429446423	CUST_327_PI429446423	FALSE									Mettl3	unmapped				AAGATTGAGTTATTTGGACGACCAC
582	93	149	CUST_250_PI429446423	CUST_250_PI429446423	FALSE									Mettl3	unmapped				CATGGAGCTACCGTATGGGACATTA
583	93	147	CUST_140_PI429446423	CUST_140_PI429446423	FALSE									Mettl3	unmapped				CCTCCGATGTTGATCTGGAGATAGA
584	93	145	CUST_48_PI429446428	CUST_48_PI429446428	FALSE									13Gtl2#2copy	unmapped				AGGGGGGGGGCAGCCTGAGGGCTGC
585	93	143	RC12	RC12	pos
586	93	141	CUST_49_PI429446423	CUST_49_PI429446423	FALSE									Mettl3	unmapped				ATCTGTGGCCCCTGAACTAGCTACA
587	93	139	CUST_68_PI429446417	CUST_68_PI429446417	FALSE									#3	unmapped				GTAGCTGCCGGCGGCGCGGTACTGC
588	93	137	CUST_205_PI429446423	CUST_205_PI429446423	FALSE									Mettl3	unmapped				CAAATATGTTCACTATGAAATTGAT
589	93	135	CUST_80_PI429446423	CUST_80_PI429446423	FALSE									Mettl3	unmapped				GCCTTCTCCAGAAATTTGCCGCCCA
590	93	133	CUST_146_PI429446423	CUST_146_PI429446423	FALSE									Mettl3	unmapped				TTTTGAACCAACAGTCAACGAAAGA
591	93	131	NA	NA	ignore
592	93	129	CUST_209_PI429446423	CUST_209_PI429446423	FALSE									Mettl3	unmapped				TTGATGCTTGTGTTGATTCTGAGAG
593	93	127	A_51_P279552	A_51_P279552	FALSE	NM_016900	NM_016900	12390	Cav2	caveolin 2	Mm.396075	ENSMUST00000000058		ref|NM_016900|ens|ENSMUST00000000058|gb|AF141322|gb|AK151397	chr6:17238393-17238452	mm|6qA2	Mus musculus caveolin 2 (Cav2), mRNA [NM_016900]	GO:0000149(SNARE binding)|GO:0001937(negative regulation of endothelial cell proliferation)|GO:0001938(positive regulation of endothelial cell proliferation)|GO:0002080(acrosomal membrane)|GO:0005622(intracellular)|GO:0005634(nucleus)|GO:0005737(cytoplasm)|GO:0005794(Golgi apparatus)|GO:0005811(lipid particle)|GO:0005829(cytosol)|GO:0005886(plasma membrane)|GO:0005887(integral to plasma membrane)…	TTATAGGTCATTGAACTGGGATTCTATTGCAGACCAGGTCAAAATATCATATTAAGAGAC
594	93	125	CUST_41_PI429446421	CUST_41_PI429446421	FALSE									anti_actB	unmapped				CCAGGGAGGAAGAGGATGCGGCAGT
595	93	123	CUST_38_PI429446421	CUST_38_PI429446421	FALSE									anti_actB	unmapped				GCTCATAGCTCTTCTCCAGGGAGGA
596	93	121	CUST_270_PI429446423	CUST_270_PI429446423	FALSE									Mettl3	unmapped				AGGGCCATGGAATTGGGCAGAGAAT
597	93	119	A_51_P348334	A_51_P348334	FALSE	NM_011144	NM_011144	19013	Ppara	peroxisome proliferator activated receptor alpha	Mm.212789	ENSMUST00000057979		ref|NM_011144|ref|NM_001113418|ens|ENSMUST00000057979|ens|ENSMUST00000109423	chr15:85631955-85632014	mm|15qE2	Mus musculus peroxisome proliferator activated receptor alpha (Ppara), transcript variant 1, mRNA [NM_011144]	GO:0000122(negative regulation of transcription from RNA polymerase II promoter)|GO:0001103(RNA polymerase II repressing transcription factor binding)|GO:0001666(response to hypoxia)|GO:0003677(DNA binding)|GO:0003700(sequence-specific DNA binding transcription factor activity)|GO:0003707(steroid hormone receptor activity)|GO:0004872(receptor activity)|GO:0004879(ligand-activated sequence-specifi…	CAATGTTAATCAATGCACAGCACTCTACGTTGCGTTTATAATTCGCCATTAATTAACGGG
598	93	117	CUST_198_PI429446423	CUST_198_PI429446423	FALSE									Mettl3	unmapped				TCTTTCCTTAACACATGTTTCCACA
599	93	115	CUST_221_PI429446423	CUST_221_PI429446423	FALSE									Mettl3	unmapped				TTGCTCTTACACAGAGTGTTGGGGG
600	93	113	CUST_81_PI429446423	CUST_81_PI429446423	FALSE									Mettl3	unmapped				CTCCAGAAATTTGCCGCCCAGGAGT
601	93	111	CUST_19_PI429446419	CUST_19_PI429446419	FALSE									#10	unmapped				GCGCTCCGTGTAGACGCCGCACGCG
602	93	109	CUST_111_PI429446417	CUST_111_PI429446417	FALSE									#3	unmapped				TGCCGACGCCCGGGGCCGCTACGCA
603	93	107	CUST_116_PI429446417	CUST_116_PI429446417	FALSE									#3	unmapped				ACTGCTGCTTCCCCGGGAGTTTTCC
604	93	105	CUST_38_PI429446430	CUST_38_PI429446430	FALSE									14Gtl2#4copy	unmapped				TTTGGGGCATTAGGAGGGGTGGTGT
605	93	103	RC6	RC6	pos
606	93	101	CUST_313_PI429446423	CUST_313_PI429446423	FALSE									Mettl3	unmapped				GGTTCGTTCCACCAGTCATAAACCA
607	93	99	CUST_67_PI429446419	CUST_67_PI429446419	FALSE									#10	unmapped				AGCGCCCAGTCGCCGCTCTAAGCTC
608	93	97	CUST_6_PI429446433	CUST_6_PI429446433	FALSE									15Gtl2#6copy	unmapped				GTAACACGAACATTACCCCAGCAAA
609	93	95	CUST_83_PI429446426	CUST_83_PI429446426	FALSE									12Gtl2#1copy	unmapped				CGGGGGGGTGGGGGTGGGGGGCTCT
610	93	93	A_51_P505868	A_51_P505868	FALSE	NM_175386	NM_175386	108927	Lhfp	lipoma HMGIC fusion partner	Mm.118617	ENSMUST00000137954		ref|NM_175386|ens|ENSMUST00000137954|ens|ENSMUST00000059562|ens|ENSMUST00000147139	chr3:53064744-53064803	mm|3qC	Mus musculus lipoma HMGIC fusion partner (Lhfp), mRNA [NM_175386]	GO:0003674(molecular_function)|GO:0005575(cellular_component)|GO:0008150(biological_process)|GO:0016020(membrane)|GO:0016021(integral to membrane)	AAATGGACCAAAGGCTAAAAACATTGCAGGGCATTGTTGTTTCTATTCCACAGAGTACCG
611	93	91	NA	NA	ignore
612	93	89	CUST_71_PI429446428	CUST_71_PI429446428	FALSE									13Gtl2#2copy	unmapped				GAGGAGGTGGCCTTTGTTCTCCTGC
613	93	87	CUST_36_PI429446433	CUST_36_PI429446433	FALSE									15Gtl2#6copy	unmapped				CCCCTTCTCTCCTCTTCCCTCTTTT
614	93	85	CUST_213_PI429446423	CUST_213_PI429446423	FALSE									Mettl3	unmapped				GAGAGTCCTGGCAGCAAGGAGCATA
615	93	83	CUST_109_PI429446417	CUST_109_PI429446417	FALSE									#3	unmapped				CTGCCGCCACTGCCGACGCCCGGGG
616	93	81	CUST_85_PI429446433	CUST_85_PI429446433	FALSE									15Gtl2#6copy	unmapped				TCTTCTGAACACCCCCTGCCAAGAG
617	93	79	CUST_217_PI429446423	CUST_217_PI429446423	FALSE									Mettl3	unmapped				GCATATGCCAAGCCAGGAGCTTGCT
618	93	77	CUST_81_PI429446423	CUST_81_PI429446423	FALSE									Mettl3	unmapped				CTCCAGAAATTTGCCGCCCAGGAGT
619	93	75	CUST_281_PI429446423	CUST_281_PI429446423	FALSE									Mettl3	unmapped				ATGAAATCATCTGGGTGAAGACTAA
620	93	73	CUST_344_PI429446423	CUST_344_PI429446423	FALSE									Mettl3	unmapped				ACCCAGATGTGGTTGCCAGGTTTAA
621	93	71	CUST_80_PI429446426	CUST_80_PI429446426	FALSE									12Gtl2#1copy	unmapped				TAAATAAGGCGGCGGCGGGGGGGTG
622	93	69	CUST_65_PI429446433	CUST_65_PI429446433	FALSE									15Gtl2#6copy	unmapped				TTTCCTCCTCTATCCTTCTCTTTCT
623	93	67	CUST_43_PI429446426	CUST_43_PI429446426	FALSE									12Gtl2#1copy	unmapped				TTCCTACCTTAACAACGCCCCCACC
624	93	65	CUST_84_PI429446430	CUST_84_PI429446430	FALSE									14Gtl2#4copy	unmapped				GGAGATGAGAAAAATTAGCTTTCTC
625	93	63	CUST_98_PI429446417	CUST_98_PI429446417	FALSE									#3	unmapped				TTTGCAGCCGCCGGTGGCGACGCCG
626	93	61	CUST_84_PI429446430	CUST_84_PI429446430	FALSE									14Gtl2#4copy	unmapped				GGAGATGAGAAAAATTAGCTTTCTC
627	93	59	CUST_45_PI429446419	CUST_45_PI429446419	FALSE									#10	unmapped				CGCGGGGCGCGCGGGATGCATGGCG
628	93	57	CUST_106_PI429446417	CUST_106_PI429446417	FALSE									#3	unmapped				GCCTCCTGGTGGCCGCTGCCGCCAC
629	93	55	CUST_331_PI429446423	CUST_331_PI429446423	FALSE									Mettl3	unmapped				ACCACACAATGTGCAGCCCAACTGG
630	93	53	(+)eQC-40	(+)eQC-40	pos
631	93	51	CUST_65_PI429446428	CUST_65_PI429446428	FALSE									13Gtl2#2copy	unmapped				GGAATTTTGGGGGGCGGGGTGGGGA
632	93	49	CUST_5_PI429446426	CUST_5_PI429446426	FALSE									12Gtl2#1copy	unmapped				ATGTTTTTTGCTGCATAATGACGTC
633	93	47	CUST_46_PI429446428	CUST_46_PI429446428	FALSE									13Gtl2#2copy	unmapped				TGGCTGGCTGAGGGGGGGGGCAGCC
634	93	45	CUST_46_PI429446421	CUST_46_PI429446421	FALSE									anti_actB	unmapped				GGCCATCTCCTGCTCGAAGTCTAGA
635	93	43	CUST_133_PI429446417	CUST_133_PI429446417	FALSE									#3	unmapped				CCCGGCGGGTTGCTCGCCTCCGGGG
636	93	41	CUST_47_PI429446417	CUST_47_PI429446417	FALSE									#3	unmapped				CACCGCGCGGCCCGCCTTCTTCACC
637	93	39	A_51_P271160	A_51_P271160	FALSE	NM_147068	NM_147068	259071	Olfr166	olfactory receptor 166	Mm.377822	ENSMUST00000074739		ref|NM_147068|ref|NM_146357|ens|ENSMUST00000074739|ens|ENSMUST00000078554	chr16:19487305-19487364	mm|16qA3	Mus musculus olfactory receptor 166 (Olfr166), mRNA [NM_147068]	GO:0004871(signal transducer activity)|GO:0004930(G-protein coupled receptor activity)|GO:0004984(olfactory receptor activity)|GO:0005886(plasma membrane)|GO:0007165(signal transduction)|GO:0007186(G-protein coupled receptor signaling pathway)|GO:0007608(sensory perception of smell)|GO:0016020(membrane)|GO:0016021(integral to membrane)|GO:0050896(response to stimulus)	ATCTGCCATCCCCTTCACTATCCCATTCGCATGAGCAAAATAATGTGTCTGAAGATGATC
638	93	37	CUST_329_PI429446423	CUST_329_PI429446423	FALSE									Mettl3	unmapped				TATTTGGACGACCACACAATGTGCA
639	93	35	(-)3xSLv1	(-)3xSLv1	neg
640	93	33	NA	NA	ignore
641	93	31	NA	NA	ignore
642	93	29	CUST_98_PI429446433	CUST_98_PI429446433	FALSE									15Gtl2#6copy	unmapped				CCAGTACCAGCCATGATGGGGACTT
643	93	27	CUST_10_PI429446421	CUST_10_PI429446421	FALSE									anti_actB	unmapped				GTCAACGTCACACTTCATGATGGAA
644	93	25	CUST_346_PI429446423	CUST_346_PI429446423	FALSE									Mettl3	unmapped				GGTTGCCAGGTTTAAGCAAAGGTAT
645	93	23	CUST_227_PI429446423	CUST_227_PI429446423	FALSE									Mettl3	unmapped				CCAGTGCTGATCGACTCTTTCCACC
646	93	21	CUST_66_PI429446430	CUST_66_PI429446430	FALSE									14Gtl2#4copy	unmapped				TCCTTGAATTTTTTCTTACTGCTCT
647	93	19	CUST_179_PI429446423	CUST_179_PI429446423	FALSE									Mettl3	unmapped				AGTGCATGAAAGCCAGTGACGCTGA
648	93	17	CUST_309_PI429446423	CUST_309_PI429446423	FALSE									Mettl3	unmapped				TGCGATGTGATTGTAGCTGAGGTTC
649	93	15	CUST_62_PI429446426	CUST_62_PI429446426	FALSE									12Gtl2#1copy	unmapped				TCAGTGCCTCTCAGCCCCAGGACCC
650	93	13	CUST_28_PI429446423	CUST_28_PI429446423	FALSE									Mettl3	unmapped				GCACTTGGATTTAAGGAACCCAGAA
651	93	11	(+)E1A_r60_a135	(+)E1A_r60_a135	pos
652	93	9	CUST_13_PI429446430	CUST_13_PI429446430	FALSE									14Gtl2#4copy	unmapped				GTGTGGTTCATTCATGCATGTTAGC
653	93	7	CUST_27_PI429446426	CUST_27_PI429446426	FALSE									12Gtl2#1copy	unmapped				AGTATCTGACACATTCAGAAAGCTC
654	93	5	CUST_21_PI429446428	CUST_21_PI429446428	FALSE									13Gtl2#2copy	unmapped				ATTGCGCATGATGGCTGCGGCTAGA
655	93	3	CUST_54_PI429446419	CUST_54_PI429446419	FALSE									#10	unmapped				AGGGGAGCGGAGTGGAGCACGCGGG
656	93	1	CUST_7_PI429446430	CUST_7_PI429446430	FALSE									14Gtl2#4copy	unmapped				AGGCTGGCTGTGTGGTCCTGGCTAA
657	92	164	CUST_92_PI429446426	CUST_92_PI429446426	FALSE									12Gtl2#1copy	unmapped				AGGGCCTCTGACTTTCCTTTTAGGG
658	92	162	CUST_279_PI429446423	CUST_279_PI429446423	FALSE									Mettl3	unmapped				GAACGGGTGGATGAAATCATCTGGG
659	92	160	CUST_195_PI429446423	CUST_195_PI429446423	FALSE									Mettl3	unmapped				TCTTTAGGTGACTGCTCTTTCCTTA
660	92	158	CUST_129_PI429446423	CUST_129_PI429446423	FALSE									Mettl3	unmapped				TCTTCAGCATCAGAACCAGCTAAGG
661	92	156	CUST_6_PI429446428	CUST_6_PI429446428	FALSE									13Gtl2#2copy	unmapped				TGCAGAAAAGGGGGTGTGTGGAGGT
662	92	154	CUST_171_PI429446423	CUST_171_PI429446423	FALSE									Mettl3	unmapped				GCCCAGGTGCAAGAATTTTGTGATT
663	92	152	CUST_40_PI429446417	CUST_40_PI429446417	FALSE									#3	unmapped				GCGCCGTCTGTCGCCGCCGCCTCCT
664	92	150	(+)E1A_r60_a22	(+)E1A_r60_a22	pos
665	92	148	CUST_31_PI429446419	CUST_31_PI429446419	FALSE									#10	unmapped				GCAGCCGGGCTCTCGCACCAGCTCC
666	92	146	CUST_79_PI429446423	CUST_79_PI429446423	FALSE									Mettl3	unmapped				AGAAAGCCTTCTCCAGAAATTTGCC
667	92	144	CUST_68_PI429446419	CUST_68_PI429446419	FALSE									#10	unmapped				CCAGTCGCCGCTCTAAGCTCGCATC
668	92	142	CUST_112_PI429446426	CUST_112_PI429446426	FALSE									12Gtl2#1copy	unmapped				CCAAGATAGATCCTTCGTCCCTTTC
669	92	140	CUST_37_PI429446433	CUST_37_PI429446433	FALSE									15Gtl2#6copy	unmapped				TCTCTCCTCTTCCCTCTTTTCATCC
670	92	138	CUST_162_PI429446423	CUST_162_PI429446423	FALSE									Mettl3	unmapped				GCCAAGGAACAGTCCATTGTTGAAA
671	92	136	CUST_182_PI429446423	CUST_182_PI429446423	FALSE									Mettl3	unmapped				GTGACGCTGACCGGCCTTGTCGCAA
672	92	134	CUST_53_PI429446433	CUST_53_PI429446433	FALSE									15Gtl2#6copy	unmapped				CACGTCTTTGCTTTTTCTTTTGATT
673	92	132	CUST_298_PI429446423	CUST_298_PI429446423	FALSE									Mettl3	unmapped				ACACTGCTTGGTTGGTGTTAAGGGA
674	92	130	CUST_58_PI429446417	CUST_58_PI429446417	FALSE									#3	unmapped				GTCTCCGGGCTGGGCGGCGCGAAGA
675	92	128	CUST_7_PI429446426	CUST_7_PI429446426	FALSE									12Gtl2#1copy	unmapped				CTGCATAATGACGTCTGTGGCTGGA
676	92	126	CUST_16_PI429446423	CUST_16_PI429446423	FALSE									Mettl3	unmapped				TAAGAAACAGCTGGACTCGCTTCGC
677	92	124	ETG10_13482	ETG10_13482	pos
678	92	122	CUST_78_PI429446423	CUST_78_PI429446423	FALSE									Mettl3	unmapped				GGGGTAGAAAGCCTTCTCCAGAAAT
679	92	120	CUST_38_PI429446428	CUST_38_PI429446428	FALSE									13Gtl2#2copy	unmapped				CCGTGAAGCCCCCCCTGGCCGCCCC
680	92	118	CUST_20_PI429446430	CUST_20_PI429446430	FALSE									14Gtl2#4copy	unmapped				CTCTGTGGTGCCCTGGCCTTCCCTT
681	92	116	CUST_40_PI429446423	CUST_40_PI429446423	FALSE									Mettl3	unmapped				CGTGCCTACTGCCCCTACCTCTAGC
682	92	114	CUST_37_PI429446430	CUST_37_PI429446430	FALSE									14Gtl2#4copy	unmapped				TATGCTTTGGGGCATTAGGAGGGGT
683	92	112	CUST_34_PI429446430	CUST_34_PI429446430	FALSE									14Gtl2#4copy	unmapped				AGCTGGCTGGGCCACTATGCTTTGG
684	92	110	CUST_76_PI429446423	CUST_76_PI429446423	FALSE									Mettl3	unmapped				CACTCAAGATGGGGTAGAAAGCCTT
685	92	108	CUST_100_PI429446423	CUST_100_PI429446423	FALSE									Mettl3	unmapped				CAAGCTGTCTGCCATGATGGGGGCT
686	92	106	CUST_27_PI429446428	CUST_27_PI429446428	FALSE									13Gtl2#2copy	unmapped				ACGTGTTGAAGGCTTTTGACTTTTG
687	92	104	CUST_6_PI429446423	CUST_6_PI429446423	FALSE									Mettl3	unmapped				GACGACAAGGGATCTGAATTCTCGG
688	92	102	CUST_44_PI429446433	CUST_44_PI429446433	FALSE									15Gtl2#6copy	unmapped				TCTCCTTCCTCTTCTGACTTTTCTT
689	92	100	CUST_41_PI429446423	CUST_41_PI429446423	FALSE									Mettl3	unmapped				CTACTGCCCCTACCTCTAGCGGCCC
690	92	98	CUST_71_PI429446433	CUST_71_PI429446433	FALSE									15Gtl2#6copy	unmapped				CTTCTGTCTTTCCTCCTTTTCCCAC
691	92	96	CUST_50_PI429446417	CUST_50_PI429446417	FALSE									#3	unmapped				CTTCTTCACCTCCACGAAGGCGCTA
692	92	94	CUST_46_PI429446421	CUST_46_PI429446421	FALSE									anti_actB	unmapped				GGCCATCTCCTGCTCGAAGTCTAGA
693	92	92	CUST_70_PI429446426	CUST_70_PI429446426	FALSE									12Gtl2#1copy	unmapped				CCTAGGCTTGCTGGCCATAGGGGGC
694	92	90	CUST_45_PI429446419	CUST_45_PI429446419	FALSE									#10	unmapped				CGCGGGGCGCGCGGGATGCATGGCG
695	92	88	CUST_40_PI429446421	CUST_40_PI429446421	FALSE									anti_actB	unmapped				CTTCTCCAGGGAGGAAGAGGATGCG
696	92	86	CUST_98_PI429446426	CUST_98_PI429446426	FALSE									12Gtl2#1copy	unmapped				ATCATTCTCGCTCCTTTTCTGTCAC
697	92	84	CUST_177_PI429446423	CUST_177_PI429446423	FALSE									Mettl3	unmapped				ACCAAGGAAGAGTGCATGAAAGCCA
698	92	82	CUST_13_PI429446430	CUST_13_PI429446430	FALSE									14Gtl2#4copy	unmapped				GTGTGGTTCATTCATGCATGTTAGC
699	92	80	CUST_110_PI429446426	CUST_110_PI429446426	FALSE									12Gtl2#1copy	unmapped				ACCTGTCACCCCAAGATAGATCCTT
700	92	78	CUST_180_PI429446423	CUST_180_PI429446423	FALSE									Mettl3	unmapped				ATGAAAGCCAGTGACGCTGACCGGC
701	92	76	CUST_320_PI429446423	CUST_320_PI429446423	FALSE									Mettl3	unmapped				ATGGCATGATTGAGAGACTGTCCCC
702	92	74	CUST_51_PI429446433	CUST_51_PI429446433	FALSE									15Gtl2#6copy	unmapped				CTCTTCCCTACACGTCTTTGCTTTT
703	92	72	CUST_305_PI429446423	CUST_305_PI429446423	FALSE									Mettl3	unmapped				GATTCAACCAGGGCCTGGACTGCGA
704	92	70	NA	NA	ignore
705	92	68	CUST_48_PI429446428	CUST_48_PI429446428	FALSE									13Gtl2#2copy	unmapped				AGGGGGGGGGCAGCCTGAGGGCTGC
706	92	66	CUST_68_PI429446426	CUST_68_PI429446426	FALSE									12Gtl2#1copy	unmapped				ACAGTGGCATCCTAGGCTTGCTGGC
707	92	64	CUST_341_PI429446423	CUST_341_PI429446423	FALSE									Mettl3	unmapped				GGATACACCTACTAGACCCAGATGT
708	92	62	CUST_46_PI429446421	CUST_46_PI429446421	FALSE									anti_actB	unmapped				GGCCATCTCCTGCTCGAAGTCTAGA
709	92	60	CUST_109_PI429446426	CUST_109_PI429446426	FALSE									12Gtl2#1copy	unmapped				CACCCACCTGTCACCCCAAGATAGA
710	92	58	ETG05_36762	ETG05_36762	pos
711	92	56	CUST_122_PI429446417	CUST_122_PI429446417	FALSE									#3	unmapped				CCGAGCCAAGTTGTGGAAGTCCGTG
712	92	54	CUST_54_PI429446419	CUST_54_PI429446419	FALSE									#10	unmapped				AGGGGAGCGGAGTGGAGCACGCGGG
713	92	52	CUST_80_PI429446433	CUST_80_PI429446433	FALSE									15Gtl2#6copy	unmapped				GCACCTGGCAAGTGCAGCTGCATGC
714	92	50	CUST_275_PI429446423	CUST_275_PI429446423	FALSE									Mettl3	unmapped				GTCTGAACCTCTGGGGTTATGAACG
715	92	48	CUST_22_PI429446430	CUST_22_PI429446430	FALSE									14Gtl2#4copy	unmapped				CCCTGGCCTTCCCTTCCTTTCCATC
716	92	46	CUST_61_PI429446430	CUST_61_PI429446430	FALSE									14Gtl2#4copy	unmapped				ATAGAGGGGCTTCCAAATTATGACA
717	92	44	CUST_90_PI429446417	CUST_90_PI429446417	FALSE									#3	unmapped				CGCCCTCCGCCGCCGCCTCCTCCGG
718	92	42	CUST_20_PI429446433	CUST_20_PI429446433	FALSE									15Gtl2#6copy	unmapped				AAGACCACAGTTGCCACACAGTGAC
719	92	40	CUST_33_PI429446426	CUST_33_PI429446426	FALSE									12Gtl2#1copy	unmapped				GATGCCCCCAAAGCCCTAAACCTTC
720	92	38	CUST_37_PI429446433	CUST_37_PI429446433	FALSE									15Gtl2#6copy	unmapped				TCTCTCCTCTTCCCTCTTTTCATCC
721	92	36	CUST_178_PI429446423	CUST_178_PI429446423	FALSE									Mettl3	unmapped				GGAAGAGTGCATGAAAGCCAGTGAC
722	92	34	NA	NA	ignore
723	92	32	CUST_18_PI429446417	CUST_18_PI429446417	FALSE									#3	unmapped				CCAGCAACTTCTCGGGGGCCCCAGG
724	92	30	CUST_40_PI429446419	CUST_40_PI429446419	FALSE									#10	unmapped				GGGCAGTGAGCGCAGCCGCCCAGAG
725	92	28	CUST_78_PI429446417	CUST_78_PI429446417	FALSE									#3	unmapped				TGGAGGTCGCCAGCGGCCTCTCGGA
726	92	26	CUST_63_PI429446417	CUST_63_PI429446417	FALSE									#3	unmapped				GCCGGCCGTTCTCCTCCAGGCCGAA
727	92	24	CUST_350_PI429446423	CUST_350_PI429446423	FALSE									Mettl3	unmapped				GGTATCCGGACGGCATCATCTCTAA
728	92	22	CUST_102_PI429446426	CUST_102_PI429446426	FALSE									12Gtl2#1copy	unmapped				GTCACCAGACGCTTCTTCTTTGGAC
729	92	20	CUST_338_PI429446423	CUST_338_PI429446423	FALSE									Mettl3	unmapped				GAAACCAACTGGATGGGATACACCT
730	92	18	CUST_30_PI429446423	CUST_30_PI429446423	FALSE									Mettl3	unmapped				TTAAGGAACCCAGAAGCGGCACTGT
731	92	16	CUST_62_PI429446430	CUST_62_PI429446430	FALSE									14Gtl2#4copy	unmapped				GGGGCTTCCAAATTATGACATCCTT
732	92	14	NA	NA	ignore
733	92	12	CUST_51_PI429446433	CUST_51_PI429446433	FALSE									15Gtl2#6copy	unmapped				CTCTTCCCTACACGTCTTTGCTTTT
734	92	10	RC8	RC8	pos
735	92	8	CUST_9_PI429446428	CUST_9_PI429446428	FALSE									13Gtl2#2copy	unmapped				GTGTGGAGGTGTGGGGGGTGATCTG
736	92	6	CUST_111_PI429446417	CUST_111_PI429446417	FALSE									#3	unmapped				TGCCGACGCCCGGGGCCGCTACGCA
737	92	4	CUST_57_PI429446417	CUST_57_PI429446417	FALSE									#3	unmapped				CGCCAGTCTCCGGGCTGGGCGGCGC
738	92	2	(-)3xSLv1	(-)3xSLv1	neg
739	92	163	CUST_11_PI429446428	CUST_11_PI429446428	FALSE									13Gtl2#2copy	unmapped				GTGGGGGGTGATCTGAGTGCTGGAA
740	92	161	CUST_160_PI429446423	CUST_160_PI429446423	FALSE									Mettl3	unmapped				TACCACAACAGCCAAGGAACAGTCC
741	92	159	CUST_54_PI429446430	CUST_54_PI429446430	FALSE									14Gtl2#4copy	unmapped				CTGCCCCCTGGGACAGTGCCAAGAA
742	92	157	CUST_51_PI429446430	CUST_51_PI429446430	FALSE									14Gtl2#4copy	unmapped				GTGGTGTGTGCATATCTGCCCCCTG
743	92	155	CUST_100_PI429446433	CUST_100_PI429446433	FALSE									15Gtl2#6copy	unmapped				CCATGATGGGGACTTTGGCATGTGT
744	92	153	CUST_105_PI429446426	CUST_105_PI429446426	FALSE									12Gtl2#1copy	unmapped				TTCTTTGGACTCACAGTTGCCACCC
745	92	151	CUST_54_PI429446419	CUST_54_PI429446419	FALSE									#10	unmapped				AGGGGAGCGGAGTGGAGCACGCGGG
746	92	149	CUST_97_PI429446423	CUST_97_PI429446423	FALSE									Mettl3	unmapped				TTACGCTGACCACTCCAAGCTGTCT
747	92	147	CUST_104_PI429446417	CUST_104_PI429446417	FALSE									#3	unmapped				ACTCAGCTCCGCCTCCTGGTGGCCG
748	92	145	CUST_68_PI429446417	CUST_68_PI429446417	FALSE									#3	unmapped				GTAGCTGCCGGCGGCGCGGTACTGC
749	92	143	CUST_67_PI429446428	CUST_67_PI429446428	FALSE									13Gtl2#2copy	unmapped				GGGGCGGGGTGGGGAGGGAAGAGGA
750	92	141	CUST_84_PI429446428	CUST_84_PI429446428	FALSE									13Gtl2#2copy	unmapped				TTCATTTACCTATGGGGAAATGTTA
751	92	139	CUST_15_PI429446421	CUST_15_PI429446421	FALSE									anti_actB	unmapped				TTGAATGTAGTTTCATGGATGCCAC
752	92	137	CUST_172_PI429446423	CUST_172_PI429446423	FALSE									Mettl3	unmapped				GGTGCAAGAATTTTGTGATTATGGG
753	92	135	CUST_18_PI429446433	CUST_18_PI429446433	FALSE									15Gtl2#6copy	unmapped				CATGTCTACCAAGACCACAGTTGCC
754	92	133	CUST_9_PI429446419	CUST_9_PI429446419	FALSE									#10	unmapped				AGCGGGTACTGCTCCGCGGGCCGCG
755	92	131	CUST_30_PI429446433	CUST_30_PI429446433	FALSE									15Gtl2#6copy	unmapped				ATTGCCACTGCCACCGCCACCGTCA
756	92	129	CUST_29_PI429446426	CUST_29_PI429446426	FALSE									12Gtl2#1copy	unmapped				ACATTCAGAAAGCTCTTTTTGATGC
757	92	127	CUST_2_PI429446419	CUST_2_PI429446419	FALSE									#10	unmapped				TGGCGCAGAACCCGCGGCCATTCAG
758	92	125	CUST_36_PI429446426	CUST_36_PI429446426	FALSE									12Gtl2#1copy	unmapped				CTAAACCTTCATTTTCACCCTCCGA
759	92	123	CUST_33_PI429446426	CUST_33_PI429446426	FALSE									12Gtl2#1copy	unmapped				GATGCCCCCAAAGCCCTAAACCTTC
760	92	121	CUST_168_PI429446423	CUST_168_PI429446423	FALSE									Mettl3	unmapped				CGCTCTCGAGGTCGGGCCCAGGTGC
761	92	119	CUST_55_PI429446428	CUST_55_PI429446428	FALSE									13Gtl2#2copy	unmapped				GTTTCTAGAATGTTCTATTGATGGC
762	92	117	CUST_58_PI429446417	CUST_58_PI429446417	FALSE									#3	unmapped				GTCTCCGGGCTGGGCGGCGCGAAGA
763	92	115	A_51_P444920	A_51_P444920	FALSE		X89687	258209	Olfr22-ps1	olfactory receptor 22, pseudogene 1	Mm.424498			gb|X89687|tc|NP051727|nap|NAP108737-1|nap|NAP097669-001	chr11:73768791-73768850	mm|11qB4	M.musculus mRNA for TPCR35 protein. [X89687]		ATTTATCATAGGAGGGCTTGGTGTCGTACTTCCATTTCTACTCATCACAGTGTCTTATGC
764	92	113	CUST_39_PI429446423	CUST_39_PI429446423	FALSE									Mettl3	unmapped				AGTCCCGTGCCTACTGCCCCTACCT
765	92	111	CUST_166_PI429446423	CUST_166_PI429446423	FALSE									Mettl3	unmapped				TGAAAAGTTTCGCTCTCGAGGTCGG
766	92	109	CUST_70_PI429446428	CUST_70_PI429446428	FALSE									13Gtl2#2copy	unmapped				GGGAAGAGGAGGTGGCCTTTGTTCT
767	92	107	CUST_68_PI429446430	CUST_68_PI429446430	FALSE									14Gtl2#4copy	unmapped				TTTTCTTACTGCTCTCTCACTTTTA
768	92	105	CUST_41_PI429446430	CUST_41_PI429446430	FALSE									14Gtl2#4copy	unmapped				GGGGTGGTGTCTGTTGGTAGATGCT
769	92	103	NA	NA	ignore
770	92	101	RC1	RC1	pos
771	92	99	CUST_311_PI429446423	CUST_311_PI429446423	FALSE									Mettl3	unmapped				TTGTAGCTGAGGTTCGTTCCACCAG
772	92	97	CUST_72_PI429446428	CUST_72_PI429446428	FALSE									13Gtl2#2copy	unmapped				GGTGGCCTTTGTTCTCCTGCAGGAG
773	92	95	CUST_208_PI429446423	CUST_208_PI429446423	FALSE									Mettl3	unmapped				TGAAATTGATGCTTGTGTTGATTCT
774	92	93	CUST_100_PI429446433	CUST_100_PI429446433	FALSE									15Gtl2#6copy	unmapped				CCATGATGGGGACTTTGGCATGTGT
775	92	91	CUST_119_PI429446423	CUST_119_PI429446423	FALSE									Mettl3	unmapped				ATTTGACTACAGTGACCACCTTTGC
776	92	89	CUST_52_PI429446430	CUST_52_PI429446430	FALSE									14Gtl2#4copy	unmapped				GTGTGCATATCTGCCCCCTGGGACA
777	92	87	CUST_27_PI429446417	CUST_27_PI429446417	FALSE									#3	unmapped				ACGAGCCGTTGCTGCCGCCGCCGGC
778	92	85	CUST_122_PI429446417	CUST_122_PI429446417	FALSE									#3	unmapped				CCGAGCCAAGTTGTGGAAGTCCGTG
779	92	83	CUST_60_PI429446428	CUST_60_PI429446428	FALSE									13Gtl2#2copy	unmapped				CGCAAGAGGGCGCTGGTGGCACTGC
780	92	81	CUST_283_PI429446423	CUST_283_PI429446423	FALSE									Mettl3	unmapped				CTGGGTGAAGACTAATCAGCTGCAG
781	92	79	CUST_73_PI429446426	CUST_73_PI429446426	FALSE									12Gtl2#1copy	unmapped				CATAGGGGGCTTACGCGAAAGCAGC
782	92	77	CUST_3_PI429446417	CUST_3_PI429446417	FALSE									#3	unmapped				CCGAGGTGAAGGCGCTGCCGCGCGC
783	92	75	CUST_277_PI429446423	CUST_277_PI429446423	FALSE									Mettl3	unmapped				CTGGGGTTATGAACGGGTGGATGAA
784	92	73	CUST_134_PI429446423	CUST_134_PI429446423	FALSE									Mettl3	unmapped				AGCCGGCTAAGAAGTCAAGGAAGCA
785	92	71	CUST_97_PI429446423	CUST_97_PI429446423	FALSE									Mettl3	unmapped				TTACGCTGACCACTCCAAGCTGTCT
786	92	69	CUST_319_PI429446423	CUST_319_PI429446423	FALSE									Mettl3	unmapped				AATATATGGCATGATTGAGAGACTG
787	92	67	CUST_53_PI429446417	CUST_53_PI429446417	FALSE									#3	unmapped				GAAGGCGCTACGCTTCGCCTCGCCA
788	92	65	A_51_P209965	A_51_P209965	FALSE	NM_028070	NM_028070	72041	Alkbh4	alkB, alkylation repair homolog 4 (E. coli)	Mm.486605	ENSMUST00000041100		ref|NM_028070|ens|ENSMUST00000041100|ens|ENSMUST00000100568|gb|AK008083	chr5:136617257-136617316	mm|5qG2	Mus musculus alkB, alkylation repair homolog 4 (E. coli) (Alkbh4), mRNA [NM_028070]	GO:0005634(nucleus)|GO:0005737(cytoplasm)|GO:0005739(mitochondrion)|GO:0008150(biological_process)|GO:0016491(oxidoreductase activity)|GO:0016702(oxidoreductase activity, acting on single donors with incorporation of molecular oxygen, incorporation of two atoms of oxygen)|GO:0016706(oxidoreductase activity, acting on paired donors, with incorporation or reduction of molecular oxygen, 2-oxoglutara…	TGCGGCCATTCCTCAGCTCACTGAGTGTCATATGTGGAGGGATTGAGTTTTTTAGAACTT
789	92	63	CUST_11_PI429446417	CUST_11_PI429446417	FALSE									#3	unmapped				CAGCCGTCCGGGCAGAGAGCCTCCG
790	92	61	CUST_99_PI429446417	CUST_99_PI429446417	FALSE									#3	unmapped				AGCCGCCGGTGGCGACGCCGTCGGG
791	92	59	CUST_3_PI429446421	CUST_3_PI429446421	FALSE									anti_actB	unmapped				GACAGCACTGTGTTGGCATAGAGGT
792	92	57	A_51_P309854	A_51_P309854	FALSE	NM_080465	NM_080465	140492	Kcnn2	potassium intermediate/small conductance calcium-activated channel, subfamily N, member 2	Mm.458654	ENSMUST00000169783		ref|NM_080465|ens|ENSMUST00000169783|ens|ENSMUST00000066890|gb|AK149082	chr18:45845292-45845351	mm|18qC	Mus musculus potassium intermediate/small conductance calcium-activated channel, subfamily N, member 2 (Kcnn2), mRNA [NM_080465]	GO:0005216(ion channel activity)|GO:0005516(calmodulin binding)|GO:0005790(smooth endoplasmic reticulum)|GO:0005886(plasma membrane)|GO:0006810(transport)|GO:0006811(ion transport)|GO:0006813(potassium ion transport)|GO:0015269(calcium-activated potassium channel activity)|GO:0016020(membrane)|GO:0016021(integral to membrane)|GO:0016286(small conductance calcium-activated potassium channel activi…	CTATGGTTCTAATCAGCGTTATCCGGGTTCTGATGTCAGAATCTTGGGAACCTGAACACT
793	92	55	NA	NA	ignore
794	92	53	CUST_23_PI429446426	CUST_23_PI429446426	FALSE									12Gtl2#1copy	unmapped				GGGTGTTTTCTTTCTCTCCCAGTAT
795	92	51	CUST_71_PI429446426	CUST_71_PI429446426	FALSE									12Gtl2#1copy	unmapped				GCTTGCTGGCCATAGGGGGCTTACG
796	92	49	CUST_221_PI429446423	CUST_221_PI429446423	FALSE									Mettl3	unmapped				TTGCTCTTACACAGAGTGTTGGGGG
797	92	47	CUST_41_PI429446428	CUST_41_PI429446428	FALSE									13Gtl2#2copy	unmapped				TGGCCGCCCCCTCCTCATTCTGGGC
798	92	45	CUST_222_PI429446423	CUST_222_PI429446423	FALSE									Mettl3	unmapped				CTTACACAGAGTGTTGGGGGTGACT
799	92	43	CUST_188_PI429446423	CUST_188_PI429446423	FALSE									Mettl3	unmapped				ACTTCAGACGAATTATCAATAAGCA
800	92	41	CUST_39_PI429446433	CUST_39_PI429446433	FALSE									15Gtl2#6copy	unmapped				TCCCTCTTTTCATCCTTTTTCTTCC
801	92	39	CUST_4_PI429446433	CUST_4_PI429446433	FALSE									15Gtl2#6copy	unmapped				AGAGCAGATGGTAACACGAACATTA
802	92	37	CUST_83_PI429446417	CUST_83_PI429446417	FALSE									#3	unmapped				GAAGCGCGCACGGCCGCCCGCCAGC
803	92	35	CUST_86_PI429446430	CUST_86_PI429446430	FALSE									14Gtl2#4copy	unmapped				AAAATTAGCTTTCTCTACACCAAAT
804	92	33	CUST_56_PI429446417	CUST_56_PI429446417	FALSE									#3	unmapped				CGCCTCGCCAGTCTCCGGGCTGGGC
805	92	31	CUST_113_PI429446417	CUST_113_PI429446417	FALSE									#3	unmapped				CGGGGCCGCTACGCAACTGCTGCTT
806	92	29	CUST_44_PI429446419	CUST_44_PI429446419	FALSE									#10	unmapped				CAGAGCGCGGGGCGCGCGGGATGCA
807	92	27	CUST_94_PI429446423	CUST_94_PI429446423	FALSE									Mettl3	unmapped				TCCTACTCTTGTAACTTACGCTGAC
808	92	25	CUST_33_PI429446421	CUST_33_PI429446421	FALSE									anti_actB	unmapped				ATAGTGATGACCTGGCCGTCAGGCA
809	92	23	CUST_282_PI429446423	CUST_282_PI429446423	FALSE									Mettl3	unmapped				ATCATCTGGGTGAAGACTAATCAGC
810	92	21	CUST_85_PI429446433	CUST_85_PI429446433	FALSE									15Gtl2#6copy	unmapped				TCTTCTGAACACCCCCTGCCAAGAG
811	92	19	A_51_P207591	A_51_P207591	FALSE	NM_013473	NM_013473	11752	Anxa8	annexin A8	Mm.3267	ENSMUST00000022519		ref|NM_013473|ens|ENSMUST00000022519|gb|AK075870|gb|AJ002390	chr14:34913661-34913720	mm|14qB	Mus musculus annexin A8 (Anxa8), mRNA [NM_013473]	GO:0005509(calcium ion binding)|GO:0005544(calcium-dependent phospholipid binding)|GO:0005575(cellular_component)|GO:0007596(blood coagulation)|GO:0007599(hemostasis)|GO:0046872(metal ion binding)	ATCCTCTGATCGTGGTCTCCGAGCCTGAAGAACATGACAGAACTCTTCTCAATATTCGTT
812	92	17	CUST_46_PI429446421	CUST_46_PI429446421	FALSE									anti_actB	unmapped				GGCCATCTCCTGCTCGAAGTCTAGA
813	92	15	CUST_68_PI429446428	CUST_68_PI429446428	FALSE									13Gtl2#2copy	unmapped				GGGGTGGGGAGGGAAGAGGAGGTGG
814	92	13	CUST_337_PI429446423	CUST_337_PI429446423	FALSE									Mettl3	unmapped				TCTTGGAAACCAACTGGATGGGATA
815	92	11	CUST_207_PI429446423	CUST_207_PI429446423	FALSE									Mettl3	unmapped				CACTATGAAATTGATGCTTGTGTTG
816	92	9	CUST_94_PI429446417	CUST_94_PI429446417	FALSE									#3	unmapped				TCCGGGAACCGCCTCTTGCCTTTGC
817	92	7	CUST_20_PI429446417	CUST_20_PI429446417	FALSE									#3	unmapped				CTCGGGGGCCCCAGGCGACCCCGCC
818	92	5	CUST_57_PI429446417	CUST_57_PI429446417	FALSE									#3	unmapped				CGCCAGTCTCCGGGCTGGGCGGCGC
819	92	3	CUST_33_PI429446430	CUST_33_PI429446430	FALSE									14Gtl2#4copy	unmapped				GCCAAAGCTGGCTGGGCCACTATGC
820	92	1	CUST_9_PI429446426	CUST_9_PI429446426	FALSE									12Gtl2#1copy	unmapped				ACGTCTGTGGCTGGAGAAGGCCTCT
821	91	164	CUST_90_PI429446423	CUST_90_PI429446423	FALSE									Mettl3	unmapped				CTCCTCCAAGATGATGCACATCCTA
822	91	162	CUST_61_PI429446423	CUST_61_PI429446423	FALSE									Mettl3	unmapped				CTCAGATCTGGCCTTGACCTTGCCC
823	91	160	CUST_100_PI429446433	CUST_100_PI429446433	FALSE									15Gtl2#6copy	unmapped				CCATGATGGGGACTTTGGCATGTGT
824	91	158	CUST_98_PI429446426	CUST_98_PI429446426	FALSE									12Gtl2#1copy	unmapped				ATCATTCTCGCTCCTTTTCTGTCAC
825	91	156	(+)E1A_r60_n9	(+)E1A_r60_n9	pos
826	91	154	CUST_67_PI429446430	CUST_67_PI429446430	FALSE									14Gtl2#4copy	unmapped				GAATTTTTTCTTACTGCTCTCTCAC
827	91	152	CUST_61_PI429446430	CUST_61_PI429446430	FALSE									14Gtl2#4copy	unmapped				ATAGAGGGGCTTCCAAATTATGACA
828	91	150	CUST_292_PI429446423	CUST_292_PI429446423	FALSE									Mettl3	unmapped				GACGGGTCACTGGTTAAACCACGGG
829	91	148	CUST_305_PI429446423	CUST_305_PI429446423	FALSE									Mettl3	unmapped				GATTCAACCAGGGCCTGGACTGCGA
830	91	146	CUST_63_PI429446417	CUST_63_PI429446417	FALSE									#3	unmapped				GCCGGCCGTTCTCCTCCAGGCCGAA
831	91	144	CUST_37_PI429446426	CUST_37_PI429446426	FALSE									12Gtl2#1copy	unmapped				CCTTCATTTTCACCCTCCGAAGTGC
832	91	142	ETG04_27747	ETG04_27747	pos
833	91	140	CUST_39_PI429446430	CUST_39_PI429446430	FALSE									14Gtl2#4copy	unmapped				GGCATTAGGAGGGGTGGTGTCTGTT
834	91	138	CUST_75_PI429446423	CUST_75_PI429446423	FALSE									Mettl3	unmapped				CCTGCCACTCAAGATGGGGTAGAAA
835	91	136	CUST_20_PI429446433	CUST_20_PI429446433	FALSE									15Gtl2#6copy	unmapped				AAGACCACAGTTGCCACACAGTGAC
836	91	134	CUST_62_PI429446417	CUST_62_PI429446417	FALSE									#3	unmapped				GAAGAGCCGGCCGTTCTCCTCCAGG
837	91	132	CUST_105_PI429446426	CUST_105_PI429446426	FALSE									12Gtl2#1copy	unmapped				TTCTTTGGACTCACAGTTGCCACCC
838	91	130	CUST_24_PI429446428	CUST_24_PI429446428	FALSE									13Gtl2#2copy	unmapped				TGCGGCTAGATTCTGACGTGTTGAA
839	91	128	CUST_16_PI429446430	CUST_16_PI429446430	FALSE									14Gtl2#4copy	unmapped				GCATGTTAGCGTCTAAGTCCCTCTG
840	91	126	CUST_16_PI429446417	CUST_16_PI429446417	FALSE									#3	unmapped				GGACGCGGAGCCAGCAACTTCTCGG
841	91	124	CUST_92_PI429446430	CUST_92_PI429446430	FALSE									14Gtl2#4copy	unmapped				TTTGGACTGAGCTTAGGTTTACACA
842	91	122	NA	NA	ignore
843	91	120	CUST_35_PI429446430	CUST_35_PI429446430	FALSE									14Gtl2#4copy	unmapped				GCTGGGCCACTATGCTTTGGGGCAT
844	91	118	CUST_121_PI429446423	CUST_121_PI429446423	FALSE									Mettl3	unmapped				AGTGACCACCTTTGCCAGCTCTTTA
845	91	116	CUST_94_PI429446426	CUST_94_PI429446426	FALSE									12Gtl2#1copy	unmapped				ACTTTCCTTTTAGGGTCTCAATCAT
846	91	114	CUST_52_PI429446430	CUST_52_PI429446430	FALSE									14Gtl2#4copy	unmapped				GTGTGCATATCTGCCCCCTGGGACA
847	91	112	CUST_346_PI429446423	CUST_346_PI429446423	FALSE									Mettl3	unmapped				GGTTGCCAGGTTTAAGCAAAGGTAT
848	91	110	CUST_198_PI429446423	CUST_198_PI429446423	FALSE									Mettl3	unmapped				TCTTTCCTTAACACATGTTTCCACA
849	91	108	CUST_4_PI429446430	CUST_4_PI429446430	FALSE									14Gtl2#4copy	unmapped				TCGATGTGGTATTCGAGGCTGGCTG
850	91	106	CUST_22_PI429446421	CUST_22_PI429446421	FALSE									anti_actB	unmapped				ACCCAAGAAGGAAGGCTGGAAAAGA
851	91	104	CUST_74_PI429446428	CUST_74_PI429446428	FALSE									13Gtl2#2copy	unmapped				GTTCTCCTGCAGGAGGGGGTCGGGA
852	91	102	CUST_42_PI429446417	CUST_42_PI429446417	FALSE									#3	unmapped				TCGCCGCCGCCTCCTCCTGCAAGCC
853	91	100	(+)E1A_r60_a97	(+)E1A_r60_a97	pos
854	91	98	CUST_21_PI429446433	CUST_21_PI429446433	FALSE									15Gtl2#6copy	unmapped				CACAGTTGCCACACAGTGACCAGCA
855	91	96	CUST_115_PI429446423	CUST_115_PI429446423	FALSE									Mettl3	unmapped				GAAACGGCGTGCAGAACAGGATTTG
856	91	94	A_51_P274635	A_51_P274635	FALSE	NM_029166	NM_029166	75089	Uhrf1bp1l	UHRF1 (ICBP90) binding protein 1-like	Mm.268922	ENSMUST00000020112		ref|NM_029166|ens|ENSMUST00000020112|gb|BC132134|gb|BC138092	chr10:89280869-89280928	mm|10qC2	Mus musculus UHRF1 (ICBP90) binding protein 1-like (Uhrf1bp1l), mRNA [NM_029166]	GO:0003674(molecular_function)|GO:0005575(cellular_component)|GO:0008150(biological_process)	GTTAGTGGGAAGTTTTCCTTTACATGAAATAAAGCGAGTGGTGAAGTGGCGGCTGTTCCA
857	91	92	CUST_117_PI429446426	CUST_117_PI429446426	FALSE									12Gtl2#1copy	unmapped				AACAGCATTCTGACCTTTTCGAGAG
858	91	90	CUST_26_PI429446430	CUST_26_PI429446430	FALSE									14Gtl2#4copy	unmapped				CCATCATGGTGGCTGGTGCTGCTGG
859	91	88	CUST_113_PI429446417	CUST_113_PI429446417	FALSE									#3	unmapped				CGGGGCCGCTACGCAACTGCTGCTT
860	91	86	CUST_13_PI429446421	CUST_13_PI429446421	FALSE									anti_actB	unmapped				CATGATGGAATTGAATGTAGTTTCA
861	91	84	CUST_25_PI429446421	CUST_25_PI429446421	FALSE									anti_actB	unmapped				CTGGAAAAGAGCCTCAGGGCATCGG
862	91	82	CUST_102_PI429446417	CUST_102_PI429446417	FALSE									#3	unmapped				CGCCGTCGGGACTCAGCTCCGCCTC
863	91	80	CUST_299_PI429446423	CUST_299_PI429446423	FALSE									Mettl3	unmapped				GCTTGGTTGGTGTTAAGGGAAATCC
864	91	78	CUST_82_PI429446423	CUST_82_PI429446423	FALSE									Mettl3	unmapped				GAAATTTGCCGCCCAGGAGTTGATT
865	91	76	CUST_143_PI429446423	CUST_143_PI429446423	FALSE									Mettl3	unmapped				TGGAGATAGAAAGCCTTTTGAACCA
866	91	74	CUST_336_PI429446423	CUST_336_PI429446423	FALSE									Mettl3	unmapped				ATTACTCTTGGAAACCAACTGGATG
867	91	72	CUST_261_PI429446423	CUST_261_PI429446423	FALSE									Mettl3	unmapped				CCAGTGCTACAGGATGACGGCTTTC
868	91	70	CUST_84_PI429446417	CUST_84_PI429446417	FALSE									#3	unmapped				GCGCACGGCCGCCCGCCAGCCCCGC
869	91	68	CUST_41_PI429446430	CUST_41_PI429446430	FALSE									14Gtl2#4copy	unmapped				GGGGTGGTGTCTGTTGGTAGATGCT
870	91	66	CUST_80_PI429446430	CUST_80_PI429446430	FALSE									14Gtl2#4copy	unmapped				CCCCCTTTCTTCCCCTGCCAGGAGA
871	91	64	CUST_144_PI429446423	CUST_144_PI429446423	FALSE									Mettl3	unmapped				ATAGAAAGCCTTTTGAACCAACAGT
872	91	62	CUST_226_PI429446423	CUST_226_PI429446423	FALSE									Mettl3	unmapped				TGACTCCAGTGCTGATCGACTCTTT
873	91	60	CUST_41_PI429446417	CUST_41_PI429446417	FALSE									#3	unmapped				GTCTGTCGCCGCCGCCTCCTCCTGC
874	91	58	CUST_41_PI429446419	CUST_41_PI429446419	FALSE									#10	unmapped				GTGAGCGCAGCCGCCCAGAGCGCGG
875	91	56	CUST_72_PI429446430	CUST_72_PI429446430	FALSE									14Gtl2#4copy	unmapped				TTTTAGCTGGTAGGTCTGGGTGGCT
876	91	54	CUST_24_PI429446421	CUST_24_PI429446421	FALSE									anti_actB	unmapped				GAAGGCTGGAAAAGAGCCTCAGGGC
877	91	52	CUST_178_PI429446423	CUST_178_PI429446423	FALSE									Mettl3	unmapped				GGAAGAGTGCATGAAAGCCAGTGAC
878	91	50	CUST_94_PI429446417	CUST_94_PI429446417	FALSE									#3	unmapped				TCCGGGAACCGCCTCTTGCCTTTGC
879	91	48	CUST_253_PI429446423	CUST_253_PI429446423	FALSE									Mettl3	unmapped				TGGGACATTAACAGATGATGAGATG
880	91	46	CUST_63_PI429446430	CUST_63_PI429446430	FALSE									14Gtl2#4copy	unmapped				TTCCAAATTATGACATCCTTGAATT
881	91	44	CUST_11_PI429446417	CUST_11_PI429446417	FALSE									#3	unmapped				CAGCCGTCCGGGCAGAGAGCCTCCG
882	91	42	CUST_132_PI429446417	CUST_132_PI429446417	FALSE									#3	unmapped				CGGAGCCCGGCGGGTTGCTCGCCTC
883	91	40	CUST_81_PI429446426	CUST_81_PI429446426	FALSE									12Gtl2#1copy	unmapped				AAGGCGGCGGCGGGGGGGTGGGGGT
884	91	38	CUST_56_PI429446417	CUST_56_PI429446417	FALSE									#3	unmapped				CGCCTCGCCAGTCTCCGGGCTGGGC
885	91	36	CUST_2_PI429446417	CUST_2_PI429446417	FALSE									#3	unmapped				CGACACCGAGGTGAAGGCGCTGCCG
886	91	34	CUST_204_PI429446423	CUST_204_PI429446423	FALSE									Mettl3	unmapped				ACCTGCAAATATGTTCACTATGAAA
887	91	32	CUST_49_PI429446433	CUST_49_PI429446433	FALSE									15Gtl2#6copy	unmapped				CTTCCTCTGCCTCTTCCCTACACGT
888	91	30	CUST_210_PI429446423	CUST_210_PI429446423	FALSE									Mettl3	unmapped				GCTTGTGTTGATTCTGAGAGTCCTG
889	91	28	CUST_38_PI429446428	CUST_38_PI429446428	FALSE									13Gtl2#2copy	unmapped				CCGTGAAGCCCCCCCTGGCCGCCCC
890	91	26	CUST_28_PI429446428	CUST_28_PI429446428	FALSE									13Gtl2#2copy	unmapped				TTGAAGGCTTTTGACTTTTGGTAAA
891	91	24	CUST_12_PI429446417	CUST_12_PI429446417	FALSE									#3	unmapped				GTCCGGGCAGAGAGCCTCCGGGACG
892	91	22	CUST_11_PI429446419	CUST_11_PI429446419	FALSE									#10	unmapped				GCTCCGCGGGCCGCGGCTGGCAGCG
893	91	20	CUST_167_PI429446423	CUST_167_PI429446423	FALSE									Mettl3	unmapped				AGTTTCGCTCTCGAGGTCGGGCCCA
894	91	18	CUST_47_PI429446419	CUST_47_PI429446419	FALSE									#10	unmapped				GCGGGATGCATGGCGCCGGGTGGAC
895	91	16	NA	NA	ignore
896	91	14	CUST_349_PI429446423	CUST_349_PI429446423	FALSE									Mettl3	unmapped				GCAAAGGTATCCGGACGGCATCATC
897	91	12	CUST_186_PI429446423	CUST_186_PI429446423	FALSE									Mettl3	unmapped				CGCAAGCTGCACTTCAGACGAATTA
898	91	10	CUST_341_PI429446423	CUST_341_PI429446423	FALSE									Mettl3	unmapped				GGATACACCTACTAGACCCAGATGT
899	91	8	CUST_7_PI429446433	CUST_7_PI429446433	FALSE									15Gtl2#6copy	unmapped				ACGAACATTACCCCAGCAAAGAGGA
900	91	6	NA	NA	ignore
901	91	4	A_51_P212271	A_51_P212271	FALSE	NM_031998	NM_031998	83922	Tsga14	testis specific gene A14	Mm.65389	ENSMUST00000132763		ref|NM_031998|ens|ENSMUST00000132763|ens|ENSMUST00000140211|ens|ENSMUST00000031810	chr6:30604539-30604480	mm|6qA3.3	Mus musculus testis specific gene A14 (Tsga14), mRNA [NM_031998]	GO:0003674(molecular_function)|GO:0005737(cytoplasm)|GO:0005813(centrosome)|GO:0005814(centriole)|GO:0005856(cytoskeleton)|GO:0005929(cilium)|GO:0006810(transport)|GO:0015031(protein transport)|GO:0030030(cell projection organization)|GO:0036064(cilium basal body)|GO:0042384(cilium assembly)|GO:0042995(cell projection)|GO:0072372(primary cilium)	ATCGTAGCTGTGATAAGGGACTAAAGAATAAATTGTGCTCTTTGTCATGGCAACCAGCTT
902	91	2	CUST_19_PI429446426	CUST_19_PI429446426	FALSE									12Gtl2#1copy	unmapped				GGGGGCTCTTTGCAAAAATGGGGTG
903	91	163	CUST_3_PI429446426	CUST_3_PI429446426	FALSE									12Gtl2#1copy	unmapped				GCTGGGAGCCATGTTTTTTGCTGCA
904	91	161	CUST_31_PI429446417	CUST_31_PI429446417	FALSE									#3	unmapped				CCGGCGACACCGCCTCCCGCGTCGG
905	91	159	(+)E1A_r60_n11	(+)E1A_r60_n11	pos
906	91	157	CUST_176_PI429446423	CUST_176_PI429446423	FALSE									Mettl3	unmapped				ATGGGACCAAGGAAGAGTGCATGAA
907	91	155	(+)E1A_r60_a107	(+)E1A_r60_a107	pos
908	91	153	CUST_77_PI429446417	CUST_77_PI429446417	FALSE									#3	unmapped				CTCCTTGGAGGTCGCCAGCGGCCTC
909	91	151	CUST_97_PI429446426	CUST_97_PI429446426	FALSE									12Gtl2#1copy	unmapped				TCTCAATCATTCTCGCTCCTTTTCT
910	91	149	A_51_P475138	A_51_P475138	FALSE	NM_001099297	NM_001099297	99439	Duox1	dual oxidase 1	Mm.108582	ENSMUST00000099461		ref|NM_001099297|ens|ENSMUST00000099461|gb|AK037033|tc|TC1601504	chr2:122173491-122173550	mm|2qE5	Mus musculus dual oxidase 1 (Duox1), mRNA [NM_001099297]	GO:0005515(protein binding)|GO:0005886(plasma membrane)|GO:0016020(membrane)|GO:0016021(integral to membrane)|GO:0016491(oxidoreductase activity)|GO:0019221(cytokine-mediated signaling pathway)|GO:0042335(cuticle development)|GO:0051591(response to cAMP)|GO:0055114(oxidation-reduction process)|GO:0072593(reactive oxygen species metabolic process)	TGTGTTCTTCCTCTCTTCAAAATGGTTGGGAGATGTCTTAGAGTAGCCAGGGGCAACTTA
911	91	147	CUST_46_PI429446421	CUST_46_PI429446421	FALSE									anti_actB	unmapped				GGCCATCTCCTGCTCGAAGTCTAGA
912	91	145	CUST_205_PI429446423	CUST_205_PI429446423	FALSE									Mettl3	unmapped				CAAATATGTTCACTATGAAATTGAT
913	91	143	CUST_122_PI429446417	CUST_122_PI429446417	FALSE									#3	unmapped				CCGAGCCAAGTTGTGGAAGTCCGTG
914	91	141	CUST_41_PI429446428	CUST_41_PI429446428	FALSE									13Gtl2#2copy	unmapped				TGGCCGCCCCCTCCTCATTCTGGGC
915	91	139	CUST_46_PI429446426	CUST_46_PI429446426	FALSE									12Gtl2#1copy	unmapped				CGCCCCCACCCCTGAAAAGGCCTGA
916	91	137	CUST_23_PI429446423	CUST_23_PI429446423	FALSE									Mettl3	unmapped				AGCGGCGACGGAAGCAGGACTCTGG
917	91	135	CUST_164_PI429446423	CUST_164_PI429446423	FALSE									Mettl3	unmapped				AGTCCATTGTTGAAAAGTTTCGCTC
918	91	133	NA	NA	ignore
919	91	131	CUST_126_PI429446417	CUST_126_PI429446417	FALSE									#3	unmapped				CCGTGGACGGCTTGGCGCTGCCGGC
920	91	129	CUST_175_PI429446423	CUST_175_PI429446423	FALSE									Mettl3	unmapped				TGATTATGGGACCAAGGAAGAGTGC
921	91	127	CUST_243_PI429446423	CUST_243_PI429446423	FALSE									Mettl3	unmapped				GCAGTTGTGATGGCTGACCCACCTT
922	91	125	CUST_101_PI429446423	CUST_101_PI429446423	FALSE									Mettl3	unmapped				TGTCTGCCATGATGGGGGCTGTGGC
923	91	123	CUST_130_PI429446417	CUST_130_PI429446417	FALSE									#3	unmapped				CCGGCACCCGCGGAGCCCGGCGGGT
924	91	121	(+)E1A_r60_a107	(+)E1A_r60_a107	pos
925	91	119	NA	NA	ignore
926	91	117	A_51_P426886	A_51_P426886	FALSE	NM_008155	NM_008155	14751	Gpi1	glucose phosphate isomerase 1	Mm.589	ENSMUST00000135243		ref|NM_008155|ens|ENSMUST00000135243|ens|ENSMUST00000038027|ref|XM_003689446	chr7:34987254-34987195	mm|7qB1	Mus musculus glucose phosphate isomerase 1 (Gpi1), mRNA [NM_008155]	GO:0001525(angiogenesis)|GO:0004347(glucose-6-phosphate isomerase activity)|GO:0005125(cytokine activity)|GO:0005515(protein binding)|GO:0005576(extracellular region)|GO:0005615(extracellular space)|GO:0005634(nucleus)|GO:0005737(cytoplasm)|GO:0005829(cytosol)|GO:0005886(plasma membrane)|GO:0005975(carbohydrate metabolic process)|GO:0006006(glucose metabolic process)|GO:0006094(gluconeogenesis)|G…	ATGGAAGGGCTTTGACGTGTCATGTTGTTCTGACCTGTATTTCACACCCCAGCTAGAATA
927	91	115	CUST_40_PI429446421	CUST_40_PI429446421	FALSE									anti_actB	unmapped				CTTCTCCAGGGAGGAAGAGGATGCG
928	91	113	CUST_41_PI429446428	CUST_41_PI429446428	FALSE									13Gtl2#2copy	unmapped				TGGCCGCCCCCTCCTCATTCTGGGC
929	91	111	CUST_48_PI429446417	CUST_48_PI429446417	FALSE									#3	unmapped				CGCGGCCCGCCTTCTTCACCTCCAC
930	91	109	CUST_25_PI429446430	CUST_25_PI429446430	FALSE									14Gtl2#4copy	unmapped				CCTTTCCATCATGGTGGCTGGTGCT
931	91	107	CUST_61_PI429446423	CUST_61_PI429446423	FALSE									Mettl3	unmapped				CTCAGATCTGGCCTTGACCTTGCCC
932	91	105	CUST_24_PI429446426	CUST_24_PI429446426	FALSE									12Gtl2#1copy	unmapped				TTTTCTTTCTCTCCCAGTATCTGAC
933	91	103	A_51_P237746	A_51_P237746	FALSE		AK004226							gb|AK004226|tc|TC1596987|riken|1110051A18|nap|NAP021060-001	unmapped		Mus musculus 18-day embryo whole body cDNA, RIKEN full-length enriched library, clone:1110051A18 product:Warning: possibly chimeric clone, full insert sequence. [AK004226]		AGAGATCACATGTAGCTCATTGATATTTTGGGGTGGGGAGGGGATGAAAACCACAAACCT
934	91	101	CUST_200_PI429446423	CUST_200_PI429446423	FALSE									Mettl3	unmapped				ACACATGTTTCCACATGGACACCTG
935	91	99	CUST_88_PI429446417	CUST_88_PI429446417	FALSE									#3	unmapped				CCCGCGCCGCCGCCCTCCGCCGCCG
936	91	97	CUST_12_PI429446433	CUST_12_PI429446433	FALSE									15Gtl2#6copy	unmapped				AGATGACAGTCATAATCACTACAGC
937	91	95	CUST_1_PI429446428	CUST_1_PI429446428	FALSE									13Gtl2#2copy	unmapped				GTCTCATAGGAAGGAAAAGATAAAA
938	91	93	CUST_4_PI429446430	CUST_4_PI429446430	FALSE									14Gtl2#4copy	unmapped				TCGATGTGGTATTCGAGGCTGGCTG
939	91	91	CUST_132_PI429446417	CUST_132_PI429446417	FALSE									#3	unmapped				CGGAGCCCGGCGGGTTGCTCGCCTC
940	91	89	CUST_97_PI429446417	CUST_97_PI429446417	FALSE									#3	unmapped				TTGCCTTTGCAGCCGCCGGTGGCGA
941	91	87	CUST_5_PI429446433	CUST_5_PI429446433	FALSE									15Gtl2#6copy	unmapped				AGATGGTAACACGAACATTACCCCA
942	91	85	CUST_68_PI429446428	CUST_68_PI429446428	FALSE									13Gtl2#2copy	unmapped				GGGGTGGGGAGGGAAGAGGAGGTGG
943	91	83	CUST_245_PI429446423	CUST_245_PI429446423	FALSE									Mettl3	unmapped				TGGCTGACCCACCTTGGGATATTCA
944	91	81	CUST_57_PI429446417	CUST_57_PI429446417	FALSE									#3	unmapped				CGCCAGTCTCCGGGCTGGGCGGCGC
945	91	79	CUST_19_PI429446417	CUST_19_PI429446417	FALSE									#3	unmapped				AACTTCTCGGGGGCCCCAGGCGACC
946	91	77	CUST_37_PI429446417	CUST_37_PI429446417	FALSE									#3	unmapped				TCGGCCGTGCCCCCTGCGCCGTCTG
947	91	75	CUST_11_PI429446417	CUST_11_PI429446417	FALSE									#3	unmapped				CAGCCGTCCGGGCAGAGAGCCTCCG
948	91	73	CUST_75_PI429446428	CUST_75_PI429446428	FALSE									13Gtl2#2copy	unmapped				CCTGCAGGAGGGGGTCGGGAGCGAG
949	91	71	CUST_40_PI429446421	CUST_40_PI429446421	FALSE									anti_actB	unmapped				CTTCTCCAGGGAGGAAGAGGATGCG
950	91	69	CUST_264_PI429446423	CUST_264_PI429446423	FALSE									Mettl3	unmapped				GACGGCTTTCTTTTCCTCTGGGTCA
951	91	67	CUST_17_PI429446433	CUST_17_PI429446433	FALSE									15Gtl2#6copy	unmapped				TGCCACATGTCTACCAAGACCACAG
952	91	65	CUST_28_PI429446430	CUST_28_PI429446430	FALSE									14Gtl2#4copy	unmapped				GGCTGGTGCTGCTGGTTGTGTGAAG
953	91	63	CUST_238_PI429446423	CUST_238_PI429446423	FALSE									Mettl3	unmapped				GGACGTCAGTATCTTGGGCAAATTT
954	91	61	CUST_117_PI429446426	CUST_117_PI429446426	FALSE									12Gtl2#1copy	unmapped				AACAGCATTCTGACCTTTTCGAGAG
955	91	59	CUST_40_PI429446433	CUST_40_PI429446433	FALSE									15Gtl2#6copy	unmapped				CTTTTCATCCTTTTTCTTCCTCTCC
956	91	57	RC3	RC3	pos
957	91	55	CUST_73_PI429446430	CUST_73_PI429446430	FALSE									14Gtl2#4copy	unmapped				GCTGGTAGGTCTGGGTGGCTGTTCT
958	91	53	CUST_243_PI429446423	CUST_243_PI429446423	FALSE									Mettl3	unmapped				GCAGTTGTGATGGCTGACCCACCTT
959	91	51	CUST_68_PI429446428	CUST_68_PI429446428	FALSE									13Gtl2#2copy	unmapped				GGGGTGGGGAGGGAAGAGGAGGTGG
960	91	49	CUST_330_PI429446423	CUST_330_PI429446423	FALSE									Mettl3	unmapped				GGACGACCACACAATGTGCAGCCCA
961	91	47	CUST_46_PI429446417	CUST_46_PI429446417	FALSE									#3	unmapped				AAGCCCACCGCGCGGCCCGCCTTCT
962	91	45	CUST_58_PI429446433	CUST_58_PI429446433	FALSE									15Gtl2#6copy	unmapped				CTTCATCTTCCCCTTTCTTCTCTCT
963	91	43	CUST_144_PI429446423	CUST_144_PI429446423	FALSE									Mettl3	unmapped				ATAGAAAGCCTTTTGAACCAACAGT
964	91	41	CUST_46_PI429446433	CUST_46_PI429446433	FALSE									15Gtl2#6copy	unmapped				CTTCTGACTTTTCTTCTTCCTCTGC
965	91	39	CUST_59_PI429446428	CUST_59_PI429446428	FALSE									13Gtl2#2copy	unmapped				ATGGCCGCAAGAGGGCGCTGGTGGC
966	91	37	CUST_87_PI429446428	CUST_87_PI429446428	FALSE									13Gtl2#2copy	unmapped				GGAAATGTTAGTAGATACCTGGATT
967	91	35	CUST_48_PI429446428	CUST_48_PI429446428	FALSE									13Gtl2#2copy	unmapped				AGGGGGGGGGCAGCCTGAGGGCTGC
968	91	33	CUST_107_PI429446417	CUST_107_PI429446417	FALSE									#3	unmapped				CTGGTGGCCGCTGCCGCCACTGCCG
969	91	31	CUST_19_PI429446430	CUST_19_PI429446430	FALSE									14Gtl2#4copy	unmapped				AGTCCCTCTGTGGTGCCCTGGCCTT
970	91	29	CUST_86_PI429446430	CUST_86_PI429446430	FALSE									14Gtl2#4copy	unmapped				AAAATTAGCTTTCTCTACACCAAAT
971	91	27	CUST_111_PI429446417	CUST_111_PI429446417	FALSE									#3	unmapped				TGCCGACGCCCGGGGCCGCTACGCA
972	91	25	CUST_68_PI429446417	CUST_68_PI429446417	FALSE									#3	unmapped				GTAGCTGCCGGCGGCGCGGTACTGC
973	91	23	CUST_69_PI429446433	CUST_69_PI429446433	FALSE									15Gtl2#6copy	unmapped				TTTCTCCCCCCTTCTGTCTTTCCTC
974	91	21	CUST_57_PI429446426	CUST_57_PI429446426	FALSE									12Gtl2#1copy	unmapped				ACCCTGGGCTCAGCGGTGGCTTTTC
975	91	19	CUST_100_PI429446426	CUST_100_PI429446426	FALSE									12Gtl2#1copy	unmapped				CTCCTTTTCTGTCACCAGACGCTTC
976	91	17	CUST_78_PI429446428	CUST_78_PI429446428	FALSE									13Gtl2#2copy	unmapped				CGGGAGCGAGATGGGTTGCGGGACC
977	91	15	CUST_63_PI429446433	CUST_63_PI429446433	FALSE									15Gtl2#6copy	unmapped				CCTCTCCTTTTTTCCTCCTCTATCC
978	91	13	CUST_209_PI429446423	CUST_209_PI429446423	FALSE									Mettl3	unmapped				TTGATGCTTGTGTTGATTCTGAGAG
979	91	11	CUST_40_PI429446426	CUST_40_PI429446426	FALSE									12Gtl2#1copy	unmapped				TCCGAAGTGCATCGGTTCCTACCTT
980	91	9	CUST_16_PI429446423	CUST_16_PI429446423	FALSE									Mettl3	unmapped				TAAGAAACAGCTGGACTCGCTTCGC
981	91	7	CUST_45_PI429446433	CUST_45_PI429446433	FALSE									15Gtl2#6copy	unmapped				TTCCTCTTCTGACTTTTCTTCTTCC
982	91	5	CUST_334_PI429446423	CUST_334_PI429446423	FALSE									Mettl3	unmapped				GCCCAACTGGATTACTCTTGGAAAC
983	91	3	NA	NA	ignore
984	91	1	CUST_49_PI429446423	CUST_49_PI429446423	FALSE									Mettl3	unmapped				ATCTGTGGCCCCTGAACTAGCTACA
985	90	164	CUST_87_PI429446428	CUST_87_PI429446428	FALSE									13Gtl2#2copy	unmapped				GGAAATGTTAGTAGATACCTGGATT
986	90	162	CUST_94_PI429446426	CUST_94_PI429446426	FALSE									12Gtl2#1copy	unmapped				ACTTTCCTTTTAGGGTCTCAATCAT
987	90	160	CUST_98_PI429446417	CUST_98_PI429446417	FALSE									#3	unmapped				TTTGCAGCCGCCGGTGGCGACGCCG
988	90	158	CUST_118_PI429446426	CUST_118_PI429446426	FALSE									12Gtl2#1copy	unmapped				CATTCTGACCTTTTCGAGAGGACAT
989	90	156	CUST_25_PI429446423	CUST_25_PI429446423	FALSE									Mettl3	unmapped				GAAGCAGGACTCTGGGCACTTGGAT
990	90	154	CUST_97_PI429446417	CUST_97_PI429446417	FALSE									#3	unmapped				TTGCCTTTGCAGCCGCCGGTGGCGA
991	90	152	NA	NA	ignore
992	90	150	CUST_6_PI429446417	CUST_6_PI429446417	FALSE									#3	unmapped				TGCCGCGCGCGGGGCTCCCGCCCTC
993	90	148	NA	NA	ignore
994	90	146	CUST_342_PI429446423	CUST_342_PI429446423	FALSE									Mettl3	unmapped				CACCTACTAGACCCAGATGTGGTTG
995	90	144	CUST_88_PI429446428	CUST_88_PI429446428	FALSE									13Gtl2#2copy	unmapped				TGTTAGTAGATACCTGGATTCACTA
996	90	142	CUST_99_PI429446426	CUST_99_PI429446426	FALSE									12Gtl2#1copy	unmapped				TCTCGCTCCTTTTCTGTCACCAGAC
997	90	140	CUST_120_PI429446423	CUST_120_PI429446423	FALSE									Mettl3	unmapped				ACTACAGTGACCACCTTTGCCAGCT
998	90	138	CUST_285_PI429446423	CUST_285_PI429446423	FALSE									Mettl3	unmapped				ACTAATCAGCTGCAGCGCATCATTA
999	90	136	CUST_62_PI429446433	CUST_62_PI429446433	FALSE									15Gtl2#6copy	unmapped				TCTCTCCTCTCCTTTTTTCCTCCTC
1000	90	134	CUST_335_PI429446423	CUST_335_PI429446423	FALSE									Mettl3	unmapped				ACTGGATTACTCTTGGAAACCAACT
1001	90	132	CUST_22_PI429446417	CUST_22_PI429446417	FALSE									#3	unmapped				CCAGGCGACCCCGCCGCGGGGGTGG
1002	90	130	CUST_7_PI429446419	CUST_7_PI429446419	FALSE									#10	unmapped				CAGCGCCCTCAGCGGGTACTGCTCC
1003	90	128	CUST_23_PI429446433	CUST_23_PI429446433	FALSE									15Gtl2#6copy	unmapped				ACACAGTGACCAGCATCTACTAAGA
1004	90	126	CUST_47_PI429446419	CUST_47_PI429446419	FALSE									#10	unmapped				GCGGGATGCATGGCGCCGGGTGGAC
1005	90	124	CUST_113_PI429446417	CUST_113_PI429446417	FALSE									#3	unmapped				CGGGGCCGCTACGCAACTGCTGCTT
1006	90	122	CUST_3_PI429446423	CUST_3_PI429446423	FALSE									Mettl3	unmapped				GACTACAAAGACGATGACGACAAGG
1007	90	120	CUST_226_PI429446423	CUST_226_PI429446423	FALSE									Mettl3	unmapped				TGACTCCAGTGCTGATCGACTCTTT
1008	90	118	CUST_75_PI429446430	CUST_75_PI429446430	FALSE									14Gtl2#4copy	unmapped				CTGGGTGGCTGTTCTCCTCCCCGCT
1009	90	116	CUST_69_PI429446423	CUST_69_PI429446423	FALSE									Mettl3	unmapped				ATCCGTCTTGCCATCTCTACGCCAG
1010	90	114	NA	NA	ignore
1011	90	112	CUST_101_PI429446417	CUST_101_PI429446417	FALSE									#3	unmapped				GGCGACGCCGTCGGGACTCAGCTCC
1012	90	110	CUST_69_PI429446417	CUST_69_PI429446417	FALSE									#3	unmapped				TGCCGGCGGCGCGGTACTGCTGCGG
1013	90	108	CUST_20_PI429446426	CUST_20_PI429446426	FALSE									12Gtl2#1copy	unmapped				CTCTTTGCAAAAATGGGGTGTTTTC
1014	90	106	CUST_67_PI429446433	CUST_67_PI429446433	FALSE									15Gtl2#6copy	unmapped				TATCCTTCTCTTTCTCCCCCCTTCT
1015	90	104	CUST_22_PI429446419	CUST_22_PI429446419	FALSE									#10	unmapped				GCCGCACGCGTCGCCTTCGCGCAGC
1016	90	102	CUST_2_PI429446433	CUST_2_PI429446433	FALSE									15Gtl2#6copy	unmapped				GAGTTTTGGTAGAGCAGATGGTAAC
1017	90	100	NA	NA	ignore
1018	90	98	CUST_334_PI429446423	CUST_334_PI429446423	FALSE									Mettl3	unmapped				GCCCAACTGGATTACTCTTGGAAAC
1019	90	96	CUST_12_PI429446423	CUST_12_PI429446423	FALSE									Mettl3	unmapped				TGGAGCTCTATCCAGGCCCATAAGA
1020	90	94	CUST_53_PI429446428	CUST_53_PI429446428	FALSE									13Gtl2#2copy	unmapped				GACGTGGCAGGTTTCTAGAATGTTC
1021	90	92	CUST_276_PI429446423	CUST_276_PI429446423	FALSE									Mettl3	unmapped				AACCTCTGGGGTTATGAACGGGTGG
1022	90	90	CUST_56_PI429446433	CUST_56_PI429446433	FALSE									15Gtl2#6copy	unmapped				TCTTTTGATTCTTCATCTTCCCCTT
1023	90	88	CUST_100_PI429446423	CUST_100_PI429446423	FALSE									Mettl3	unmapped				CAAGCTGTCTGCCATGATGGGGGCT
1024	90	86	CUST_104_PI429446423	CUST_104_PI429446423	FALSE									Mettl3	unmapped				GGGCTGTGGCAGAAAAGAAAGGTCT
1025	90	84	CUST_73_PI429446426	CUST_73_PI429446426	FALSE									12Gtl2#1copy	unmapped				CATAGGGGGCTTACGCGAAAGCAGC
1026	90	82	CUST_86_PI429446428	CUST_86_PI429446428	FALSE									13Gtl2#2copy	unmapped				TATGGGGAAATGTTAGTAGATACCT
1027	90	80	CUST_79_PI429446426	CUST_79_PI429446426	FALSE									12Gtl2#1copy	unmapped				AGGCGTAAATAAGGCGGCGGCGGGG
1028	90	78	CUST_39_PI429446419	CUST_39_PI429446419	FALSE									#10	unmapped				AGTGAGGGCAGTGAGCGCAGCCGCC
1029	90	76	CUST_194_PI429446423	CUST_194_PI429446423	FALSE									Mettl3	unmapped				ATGAATCTTTAGGTGACTGCTCTTT
1030	90	74	CUST_45_PI429446417	CUST_45_PI429446417	FALSE									#3	unmapped				CCTGCAAGCCCACCGCGCGGCCCGC
1031	90	72	CUST_26_PI429446417	CUST_26_PI429446417	FALSE									#3	unmapped				GGTGGACGAGCCGTTGCTGCCGCCG
1032	90	70	CUST_19_PI429446433	CUST_19_PI429446433	FALSE									15Gtl2#6copy	unmapped				CTACCAAGACCACAGTTGCCACACA
1033	90	68	CUST_61_PI429446419	CUST_61_PI429446419	FALSE									#10	unmapped				GGGATGGGAGCAGCAAGCAAGCAGG
1034	90	66	CUST_26_PI429446433	CUST_26_PI429446433	FALSE									15Gtl2#6copy	unmapped				TCTACTAAGATCACTGCTGCATTGC
1035	90	64	CUST_280_PI429446423	CUST_280_PI429446423	FALSE									Mettl3	unmapped				GGTGGATGAAATCATCTGGGTGAAG
1036	90	62	CUST_112_PI429446417	CUST_112_PI429446417	FALSE									#3	unmapped				ACGCCCGGGGCCGCTACGCAACTGC
1037	90	60	CUST_67_PI429446417	CUST_67_PI429446417	FALSE									#3	unmapped				CCGAAGTAGCTGCCGGCGGCGCGGT
1038	90	58	CUST_38_PI429446423	CUST_38_PI429446423	FALSE									Mettl3	unmapped				GTGATAGTCCCGTGCCTACTGCCCC
1039	90	56	CUST_64_PI429446426	CUST_64_PI429446426	FALSE									12Gtl2#1copy	unmapped				TCAGCCCCAGGACCCGAGTCACAGT
1040	90	54	CUST_1_PI429446421	CUST_1_PI429446421	FALSE									anti_actB	unmapped				GGTACCACCAGACAGCACTGTGTTG
1041	90	52	CUST_19_PI429446430	CUST_19_PI429446430	FALSE									14Gtl2#4copy	unmapped				AGTCCCTCTGTGGTGCCCTGGCCTT
1042	90	50	CUST_34_PI429446430	CUST_34_PI429446430	FALSE									14Gtl2#4copy	unmapped				AGCTGGCTGGGCCACTATGCTTTGG
1043	90	48	CUST_190_PI429446423	CUST_190_PI429446423	FALSE									Mettl3	unmapped				AATTATCAATAAGCACACTGATGAA
1044	90	46	CUST_77_PI429446433	CUST_77_PI429446433	FALSE									15Gtl2#6copy	unmapped				CATTCGCACCGAGAAGCACCTGGCA
1045	90	44	CUST_219_PI429446423	CUST_219_PI429446423	FALSE									Mettl3	unmapped				AGCCAGGAGCTTGCTCTTACACAGA
1046	90	42	CUST_55_PI429446419	CUST_55_PI429446419	FALSE									#10	unmapped				AGCGGAGTGGAGCACGCGGGATGAG
1047	90	40	CUST_102_PI429446417	CUST_102_PI429446417	FALSE									#3	unmapped				CGCCGTCGGGACTCAGCTCCGCCTC
1048	90	38	CUST_55_PI429446433	CUST_55_PI429446433	FALSE									15Gtl2#6copy	unmapped				CTTTTTCTTTTGATTCTTCATCTTC
1049	90	36	CUST_284_PI429446423	CUST_284_PI429446423	FALSE									Mettl3	unmapped				TGAAGACTAATCAGCTGCAGCGCAT
1050	90	34	CUST_27_PI429446419	CUST_27_PI429446419	FALSE									#10	unmapped				GCGCAAGTCAGGCAGCAGCCGCAGC
1051	90	32	CUST_219_PI429446423	CUST_219_PI429446423	FALSE									Mettl3	unmapped				AGCCAGGAGCTTGCTCTTACACAGA
1052	90	30	CUST_129_PI429446417	CUST_129_PI429446417	FALSE									#3	unmapped				CGCTGCCGGCACCCGCGGAGCCCGG
1053	90	28	CUST_91_PI429446423	CUST_91_PI429446423	FALSE									Mettl3	unmapped				CCAAGATGATGCACATCCTACTCTT
1054	90	26	CUST_61_PI429446430	CUST_61_PI429446430	FALSE									14Gtl2#4copy	unmapped				ATAGAGGGGCTTCCAAATTATGACA
1055	90	24	CUST_39_PI429446430	CUST_39_PI429446430	FALSE									14Gtl2#4copy	unmapped				GGCATTAGGAGGGGTGGTGTCTGTT
1056	90	22	CUST_205_PI429446423	CUST_205_PI429446423	FALSE									Mettl3	unmapped				CAAATATGTTCACTATGAAATTGAT
1057	90	20	CUST_2_PI429446423	CUST_2_PI429446423	FALSE									Mettl3	unmapped				CCATGGACTACAAAGACGATGACGA
1058	90	18	CUST_37_PI429446421	CUST_37_PI429446421	FALSE									anti_actB	unmapped				AGGCAGCTCATAGCTCTTCTCCAGG
1059	90	16	CUST_67_PI429446428	CUST_67_PI429446428	FALSE									13Gtl2#2copy	unmapped				GGGGCGGGGTGGGGAGGGAAGAGGA
1060	90	14	CUST_351_PI429446423	CUST_351_PI429446423	FALSE									Mettl3	unmapped				CCGGACGGCATCATCTCTAAACCTA
1061	90	12	CUST_295_PI429446423	CUST_295_PI429446423	FALSE									Mettl3	unmapped				AAACCACGGGAAGGAACACTGCTTG
1062	90	10	CUST_61_PI429446433	CUST_61_PI429446433	FALSE									15Gtl2#6copy	unmapped				TCTTCTCTCTCCTCTCCTTTTTTCC
1063	90	8	CUST_16_PI429446430	CUST_16_PI429446430	FALSE									14Gtl2#4copy	unmapped				GCATGTTAGCGTCTAAGTCCCTCTG
1064	90	6	A_51_P309854	A_51_P309854	FALSE	NM_080465	NM_080465	140492	Kcnn2	potassium intermediate/small conductance calcium-activated channel, subfamily N, member 2	Mm.458654	ENSMUST00000169783		ref|NM_080465|ens|ENSMUST00000169783|ens|ENSMUST00000066890|gb|AK149082	chr18:45845292-45845351	mm|18qC	Mus musculus potassium intermediate/small conductance calcium-activated channel, subfamily N, member 2 (Kcnn2), mRNA [NM_080465]	GO:0005216(ion channel activity)|GO:0005516(calmodulin binding)|GO:0005790(smooth endoplasmic reticulum)|GO:0005886(plasma membrane)|GO:0006810(transport)|GO:0006811(ion transport)|GO:0006813(potassium ion transport)|GO:0015269(calcium-activated potassium channel activity)|GO:0016020(membrane)|GO:0016021(integral to membrane)|GO:0016286(small conductance calcium-activated potassium channel activi…	CTATGGTTCTAATCAGCGTTATCCGGGTTCTGATGTCAGAATCTTGGGAACCTGAACACT
1065	90	4	CUST_44_PI429446421	CUST_44_PI429446421	FALSE									anti_actB	unmapped				ATGCGGCAGTGGCCATCTCCTGCTC
1066	90	2	CUST_13_PI429446417	CUST_13_PI429446417	FALSE									#3	unmapped				GGCAGAGAGCCTCCGGGACGCGGAG
1067	90	163	CUST_42_PI429446421	CUST_42_PI429446421	FALSE									anti_actB	unmapped				GAGGAAGAGGATGCGGCAGTGGCCA
1068	90	161	CUST_13_PI429446421	CUST_13_PI429446421	FALSE									anti_actB	unmapped				CATGATGGAATTGAATGTAGTTTCA
1069	90	159	CUST_14_PI429446433	CUST_14_PI429446433	FALSE									15Gtl2#6copy	unmapped				CATAATCACTACAGCTGCCACATGT
1070	90	157	A_51_P237746	A_51_P237746	FALSE		AK004226							gb|AK004226|tc|TC1596987|riken|1110051A18|nap|NAP021060-001	unmapped		Mus musculus 18-day embryo whole body cDNA, RIKEN full-length enriched library, clone:1110051A18 product:Warning: possibly chimeric clone, full insert sequence. [AK004226]		AGAGATCACATGTAGCTCATTGATATTTTGGGGTGGGGAGGGGATGAAAACCACAAACCT
1071	90	155	NA	NA	ignore
1072	90	153	CUST_241_PI429446423	CUST_241_PI429446423	FALSE									Mettl3	unmapped				GGGCAAATTTGCAGTTGTGATGGCT
1073	90	151	CUST_72_PI429446426	CUST_72_PI429446426	FALSE									12Gtl2#1copy	unmapped				CTGGCCATAGGGGGCTTACGCGAAA
1074	90	149	CUST_114_PI429446423	CUST_114_PI429446423	FALSE									Mettl3	unmapped				GGGCAGAAACGGCGTGCAGAACAGG
1075	90	147	CUST_58_PI429446430	CUST_58_PI429446430	FALSE									14Gtl2#4copy	unmapped				AAGAACCAAGGGTCAATAGAGGGGC
1076	90	145	CUST_63_PI429446417	CUST_63_PI429446417	FALSE									#3	unmapped				GCCGGCCGTTCTCCTCCAGGCCGAA
1077	90	143	CUST_290_PI429446423	CUST_290_PI429446423	FALSE									Mettl3	unmapped				GGACGGGCCGGACGGGTCACTGGTT
1078	90	141	CUST_34_PI429446419	CUST_34_PI429446419	FALSE									#10	unmapped				CACCAGCTCCGTGCGCGCGGAGCAG
1079	90	139	CUST_7_PI429446419	CUST_7_PI429446419	FALSE									#10	unmapped				CAGCGCCCTCAGCGGGTACTGCTCC
1080	90	137	CUST_24_PI429446419	CUST_24_PI429446419	FALSE									#10	unmapped				TCGCCTTCGCGCAGCGCGCAAGTCA
1081	90	135	CUST_62_PI429446417	CUST_62_PI429446417	FALSE									#3	unmapped				GAAGAGCCGGCCGTTCTCCTCCAGG
1082	90	133	CUST_55_PI429446433	CUST_55_PI429446433	FALSE									15Gtl2#6copy	unmapped				CTTTTTCTTTTGATTCTTCATCTTC
1083	90	131	CUST_57_PI429446428	CUST_57_PI429446428	FALSE									13Gtl2#2copy	unmapped				TGTTCTATTGATGGCCGCAAGAGGG
1084	90	129	CUST_40_PI429446417	CUST_40_PI429446417	FALSE									#3	unmapped				GCGCCGTCTGTCGCCGCCGCCTCCT
1085	90	127	CUST_1_PI429446419	CUST_1_PI429446419	FALSE									#10	unmapped				GGCGTTGGCGCAGAACCCGCGGCCA
1086	90	125	CUST_156_PI429446423	CUST_156_PI429446423	FALSE									Mettl3	unmapped				GAGATCCTAGAGCTATTAAATACCA
1087	90	123	CUST_97_PI429446417	CUST_97_PI429446417	FALSE									#3	unmapped				TTGCCTTTGCAGCCGCCGGTGGCGA
1088	90	121	CUST_125_PI429446417	CUST_125_PI429446417	FALSE									#3	unmapped				GAAGTCCGTGGACGGCTTGGCGCTG
1089	90	119	CUST_86_PI429446426	CUST_86_PI429446426	FALSE									12Gtl2#1copy	unmapped				GGGGGGCTCTTCCAGCTTCATGTCC
1090	90	117	CUST_10_PI429446421	CUST_10_PI429446421	FALSE									anti_actB	unmapped				GTCAACGTCACACTTCATGATGGAA
1091	90	115	A_51_P274635	A_51_P274635	FALSE	NM_029166	NM_029166	75089	Uhrf1bp1l	UHRF1 (ICBP90) binding protein 1-like	Mm.268922	ENSMUST00000020112		ref|NM_029166|ens|ENSMUST00000020112|gb|BC132134|gb|BC138092	chr10:89280869-89280928	mm|10qC2	Mus musculus UHRF1 (ICBP90) binding protein 1-like (Uhrf1bp1l), mRNA [NM_029166]	GO:0003674(molecular_function)|GO:0005575(cellular_component)|GO:0008150(biological_process)	GTTAGTGGGAAGTTTTCCTTTACATGAAATAAAGCGAGTGGTGAAGTGGCGGCTGTTCCA
1092	90	113	CUST_14_PI429446423	CUST_14_PI429446423	FALSE									Mettl3	unmapped				TCCAGGCCCATAAGAAACAGCTGGA
1093	90	111	CUST_235_PI429446423	CUST_235_PI429446423	FALSE									Mettl3	unmapped				TGATATCCGCTACCTGGACGTCAGT
1094	90	109	CUST_131_PI429446423	CUST_131_PI429446423	FALSE									Mettl3	unmapped				CAGAACCAGCTAAGGAGCCGGCTAA
1095	90	107	CUST_51_PI429446426	CUST_51_PI429446426	FALSE									12Gtl2#1copy	unmapped				GTCACCTCGCCGGCAAGCTGCTGAT
1096	90	105	(-)3xSLv1	(-)3xSLv1	neg
1097	90	103	CUST_20_PI429446426	CUST_20_PI429446426	FALSE									12Gtl2#1copy	unmapped				CTCTTTGCAAAAATGGGGTGTTTTC
1098	90	101	CUST_19_PI429446417	CUST_19_PI429446417	FALSE									#3	unmapped				AACTTCTCGGGGGCCCCAGGCGACC
1099	90	99	CUST_45_PI429446426	CUST_45_PI429446426	FALSE									12Gtl2#1copy	unmapped				AACAACGCCCCCACCCCTGAAAAGG
1100	90	97	CUST_88_PI429446430	CUST_88_PI429446430	FALSE									14Gtl2#4copy	unmapped				TTCTCTACACCAAATTCTGCTTTGG
1101	90	95	CUST_49_PI429446433	CUST_49_PI429446433	FALSE									15Gtl2#6copy	unmapped				CTTCCTCTGCCTCTTCCCTACACGT
1102	90	93	CUST_27_PI429446430	CUST_27_PI429446430	FALSE									14Gtl2#4copy	unmapped				ATGGTGGCTGGTGCTGCTGGTTGTG
1103	90	91	CUST_189_PI429446423	CUST_189_PI429446423	FALSE									Mettl3	unmapped				AGACGAATTATCAATAAGCACACTG
1104	90	89	CUST_186_PI429446423	CUST_186_PI429446423	FALSE									Mettl3	unmapped				CGCAAGCTGCACTTCAGACGAATTA
1105	90	87	CUST_156_PI429446423	CUST_156_PI429446423	FALSE									Mettl3	unmapped				GAGATCCTAGAGCTATTAAATACCA
1106	90	85	CUST_107_PI429446423	CUST_107_PI429446423	FALSE									Mettl3	unmapped				AGAAAGGTCTTGGAGAGGTAGCAGG
1107	90	83	CUST_25_PI429446426	CUST_25_PI429446426	FALSE									12Gtl2#1copy	unmapped				TTTCTCTCCCAGTATCTGACACATT
1108	90	81	CUST_70_PI429446430	CUST_70_PI429446430	FALSE									14Gtl2#4copy	unmapped				GCTCTCTCACTTTTAGCTGGTAGGT
1109	90	79	CUST_15_PI429446421	CUST_15_PI429446421	FALSE									anti_actB	unmapped				TTGAATGTAGTTTCATGGATGCCAC
1110	90	77	CUST_19_PI429446426	CUST_19_PI429446426	FALSE									12Gtl2#1copy	unmapped				GGGGGCTCTTTGCAAAAATGGGGTG
1111	90	75	CUST_133_PI429446423	CUST_133_PI429446423	FALSE									Mettl3	unmapped				TAAGGAGCCGGCTAAGAAGTCAAGG
1112	90	73	CUST_71_PI429446423	CUST_71_PI429446423	FALSE									Mettl3	unmapped				CCATCTCTACGCCAGATGCACCTGC
1113	90	71	CUST_22_PI429446417	CUST_22_PI429446417	FALSE									#3	unmapped				CCAGGCGACCCCGCCGCGGGGGTGG
1114	90	69	A_51_P455410	A_51_P455410	FALSE	NM_028780	NM_028780	74140	Tm9sf1	transmembrane 9 superfamily member 1	Mm.132857	ENSMUST00000002391		ref|NM_028780|ens|ENSMUST00000002391|ens|ENSMUST00000149726|ens|ENSMUST00000121791	chr14:56255011-56254952	mm|14qC3	Mus musculus transmembrane 9 superfamily member 1 (Tm9sf1), mRNA [NM_028780]	GO:0003674(molecular_function)|GO:0005575(cellular_component)|GO:0005764(lysosome)|GO:0006914(autophagy)|GO:0008150(biological_process)|GO:0016020(membrane)|GO:0016021(integral to membrane)|GO:0031410(cytoplasmic vesicle)	CCCATTGATTTCACTTGATAGCTTCTCTTCTGACCGAATTGTGTGATGGCATTGTCGCCT
1115	90	67	CUST_66_PI429446423	CUST_66_PI429446423	FALSE									Mettl3	unmapped				ACTGATGCTGTTTCCATCCGTCTTG
1116	90	65	CUST_291_PI429446423	CUST_291_PI429446423	FALSE									Mettl3	unmapped				GGCCGGACGGGTCACTGGTTAAACC
1117	90	63	CUST_59_PI429446426	CUST_59_PI429446426	FALSE									12Gtl2#1copy	unmapped				CAGCGGTGGCTTTTCTCAGTGCCTC
1118	90	61	CUST_4_PI429446421	CUST_4_PI429446421	FALSE									anti_actB	unmapped				CACTGTGTTGGCATAGAGGTCTTTA
1119	90	59	CUST_98_PI429446433	CUST_98_PI429446433	FALSE									15Gtl2#6copy	unmapped				CCAGTACCAGCCATGATGGGGACTT
1120	90	57	CUST_72_PI429446433	CUST_72_PI429446433	FALSE									15Gtl2#6copy	unmapped				GTCTTTCCTCCTTTTCCCACTTCCT
1121	90	55	CUST_303_PI429446423	CUST_303_PI429446423	FALSE									Mettl3	unmapped				AATCCTCAAGGATTCAACCAGGGCC
1122	90	53	CUST_69_PI429446426	CUST_69_PI429446426	FALSE									12Gtl2#1copy	unmapped				GGCATCCTAGGCTTGCTGGCCATAG
1123	90	51	CUST_61_PI429446417	CUST_61_PI429446417	FALSE									#3	unmapped				GGCGCGAAGAGCCGGCCGTTCTCCT
1124	90	49	CUST_133_PI429446417	CUST_133_PI429446417	FALSE									#3	unmapped				CCCGGCGGGTTGCTCGCCTCCGGGG
1125	90	47	CUST_288_PI429446423	CUST_288_PI429446423	FALSE									Mettl3	unmapped				CGCATCATTAGGACGGGCCGGACGG
1126	90	45	CUST_87_PI429446430	CUST_87_PI429446430	FALSE									14Gtl2#4copy	unmapped				TAGCTTTCTCTACACCAAATTCTGC
1127	90	43	CUST_33_PI429446417	CUST_33_PI429446417	FALSE									#3	unmapped				CGCCTCCCGCGTCGGGGTCCTCGGC
1128	90	41	CUST_17_PI429446417	CUST_17_PI429446417	FALSE									#3	unmapped				CGGAGCCAGCAACTTCTCGGGGGCC
1129	90	39	CUST_55_PI429446433	CUST_55_PI429446433	FALSE									15Gtl2#6copy	unmapped				CTTTTTCTTTTGATTCTTCATCTTC
1130	90	37	CUST_36_PI429446423	CUST_36_PI429446423	FALSE									Mettl3	unmapped				ACCTTCCGTAGTGATAGTCCCGTGC
1131	90	35	CUST_28_PI429446433	CUST_28_PI429446433	FALSE									15Gtl2#6copy	unmapped				TCACTGCTGCATTGCCACTGCCACC
1132	90	33	CUST_50_PI429446417	CUST_50_PI429446417	FALSE									#3	unmapped				CTTCTTCACCTCCACGAAGGCGCTA
1133	90	31	CUST_26_PI429446423	CUST_26_PI429446423	FALSE									Mettl3	unmapped				AGGACTCTGGGCACTTGGATTTAAG
1134	90	29	CUST_12_PI429446430	CUST_12_PI429446430	FALSE									14Gtl2#4copy	unmapped				ATCTGGTGTGGTTCATTCATGCATG
1135	90	27	CUST_41_PI429446419	CUST_41_PI429446419	FALSE									#10	unmapped				GTGAGCGCAGCCGCCCAGAGCGCGG
1136	90	25	CUST_62_PI429446428	CUST_62_PI429446428	FALSE									13Gtl2#2copy	unmapped				CGCTGGTGGCACTGCGGAATTTTGG
1137	90	23	CUST_141_PI429446423	CUST_141_PI429446423	FALSE									Mettl3	unmapped				GATGTTGATCTGGAGATAGAAAGCC
1138	90	21	CUST_90_PI429446423	CUST_90_PI429446423	FALSE									Mettl3	unmapped				CTCCTCCAAGATGATGCACATCCTA
1139	90	19	CUST_147_PI429446423	CUST_147_PI429446423	FALSE									Mettl3	unmapped				AACCAACAGTCAACGAAAGAACAGC
1140	90	17	CUST_126_PI429446417	CUST_126_PI429446417	FALSE									#3	unmapped				CCGTGGACGGCTTGGCGCTGCCGGC
1141	90	15	(+)E1A_r60_n9	(+)E1A_r60_n9	pos
1142	90	13	CUST_60_PI429446423	CUST_60_PI429446423	FALSE									Mettl3	unmapped				CACCTCTCAGATCTGGCCTTGACCT
1143	90	11	CUST_194_PI429446423	CUST_194_PI429446423	FALSE									Mettl3	unmapped				ATGAATCTTTAGGTGACTGCTCTTT
1144	90	9	CUST_8_PI429446426	CUST_8_PI429446426	FALSE									12Gtl2#1copy	unmapped				TAATGACGTCTGTGGCTGGAGAAGG
1145	90	7	CUST_62_PI429446428	CUST_62_PI429446428	FALSE									13Gtl2#2copy	unmapped				CGCTGGTGGCACTGCGGAATTTTGG
1146	90	5	CUST_54_PI429446430	CUST_54_PI429446430	FALSE									14Gtl2#4copy	unmapped				CTGCCCCCTGGGACAGTGCCAAGAA
1147	90	3	CUST_10_PI429446433	CUST_10_PI429446433	FALSE									15Gtl2#6copy	unmapped				GCAAAGAGGAAGATGACAGTCATAA
1148	90	1	CUST_80_PI429446430	CUST_80_PI429446430	FALSE									14Gtl2#4copy	unmapped				CCCCCTTTCTTCCCCTGCCAGGAGA
1149	89	164	CUST_20_PI429446417	CUST_20_PI429446417	FALSE									#3	unmapped				CTCGGGGGCCCCAGGCGACCCCGCC
1150	89	162	CUST_319_PI429446423	CUST_319_PI429446423	FALSE									Mettl3	unmapped				AATATATGGCATGATTGAGAGACTG
1151	89	160	NA	NA	ignore
1152	89	158	CUST_64_PI429446428	CUST_64_PI429446428	FALSE									13Gtl2#2copy	unmapped				ACTGCGGAATTTTGGGGGGCGGGGT
1153	89	156	CUST_31_PI429446417	CUST_31_PI429446417	FALSE									#3	unmapped				CCGGCGACACCGCCTCCCGCGTCGG
1154	89	154	A_51_P120636	A_51_P120636	FALSE	NM_007891	NM_007891	13555	E2f1	E2F transcription factor 1	Mm.18036	ENSMUST00000000894		ref|NM_007891|ens|ENSMUST00000000894|ens|ENSMUST00000103145|gb|L21973	chr2:154385801-154385742	mm|2qH1	Mus musculus E2F transcription factor 1 (E2f1), mRNA [NM_007891]	GO:0000077(DNA damage checkpoint)|GO:0000122(negative regulation of transcription from RNA polymerase II promoter)|GO:0001047(core promoter binding)|GO:0003677(DNA binding)|GO:0003700(sequence-specific DNA binding transcription factor activity)|GO:0005515(protein binding)|GO:0005634(nucleus)|GO:0005667(transcription factor complex)|GO:0005737(cytoplasm)|GO:0006351(transcription, DNA-dependent)|GO…	CTTTAATGGAGCGTTTATTTATTTATCGAGGCCTCTGCGAAGCCTGGGGGGATAAGCAAA
1155	89	152	CUST_101_PI429446433	CUST_101_PI429446433	FALSE									15Gtl2#6copy	unmapped				ATGGGGACTTTGGCATGTGTGATTG
1156	89	150	CUST_260_PI429446423	CUST_260_PI429446423	FALSE									Mettl3	unmapped				ATATACCAGTGCTACAGGATGACGG
1157	89	148	CUST_17_PI429446430	CUST_17_PI429446430	FALSE									14Gtl2#4copy	unmapped				TTAGCGTCTAAGTCCCTCTGTGGTG
1158	89	146	(+)E1A_r60_a104	(+)E1A_r60_a104	pos
1159	89	144	CUST_271_PI429446423	CUST_271_PI429446423	FALSE									Mettl3	unmapped				CATGGAATTGGGCAGAGAATGTCTG
1160	89	142	CUST_34_PI429446421	CUST_34_PI429446421	FALSE									anti_actB	unmapped				GATGACCTGGCCGTCAGGCAGCTCA
1161	89	140	CUST_13_PI429446423	CUST_13_PI429446423	FALSE									Mettl3	unmapped				CTCTATCCAGGCCCATAAGAAACAG
1162	89	138	CUST_90_PI429446433	CUST_90_PI429446433	FALSE									15Gtl2#6copy	unmapped				CACCATCTTCAAGACTTGGGCATGA
1163	89	136	CUST_54_PI429446433	CUST_54_PI429446433	FALSE									15Gtl2#6copy	unmapped				CTTTGCTTTTTCTTTTGATTCTTCA
1164	89	134	CUST_194_PI429446423	CUST_194_PI429446423	FALSE									Mettl3	unmapped				ATGAATCTTTAGGTGACTGCTCTTT
1165	89	132	CUST_50_PI429446417	CUST_50_PI429446417	FALSE									#3	unmapped				CTTCTTCACCTCCACGAAGGCGCTA
1166	89	130	CUST_98_PI429446417	CUST_98_PI429446417	FALSE									#3	unmapped				TTTGCAGCCGCCGGTGGCGACGCCG
1167	89	128	CUST_92_PI429446430	CUST_92_PI429446430	FALSE									14Gtl2#4copy	unmapped				TTTGGACTGAGCTTAGGTTTACACA
1168	89	126	CUST_90_PI429446433	CUST_90_PI429446433	FALSE									15Gtl2#6copy	unmapped				CACCATCTTCAAGACTTGGGCATGA
1169	89	124	CUST_48_PI429446417	CUST_48_PI429446417	FALSE									#3	unmapped				CGCGGCCCGCCTTCTTCACCTCCAC
1170	89	122	CUST_311_PI429446423	CUST_311_PI429446423	FALSE									Mettl3	unmapped				TTGTAGCTGAGGTTCGTTCCACCAG
1171	89	120	CUST_88_PI429446417	CUST_88_PI429446417	FALSE									#3	unmapped				CCCGCGCCGCCGCCCTCCGCCGCCG
1172	89	118	CUST_21_PI429446426	CUST_21_PI429446426	FALSE									12Gtl2#1copy	unmapped				TGCAAAAATGGGGTGTTTTCTTTCT
1173	89	116	CUST_225_PI429446423	CUST_225_PI429446423	FALSE									Mettl3	unmapped				GGGGGTGACTCCAGTGCTGATCGAC
1174	89	114	CUST_104_PI429446423	CUST_104_PI429446423	FALSE									Mettl3	unmapped				GGGCTGTGGCAGAAAAGAAAGGTCT
1175	89	112	CUST_71_PI429446428	CUST_71_PI429446428	FALSE									13Gtl2#2copy	unmapped				GAGGAGGTGGCCTTTGTTCTCCTGC
1176	89	110	NA	NA	ignore
1177	89	108	CUST_43_PI429446433	CUST_43_PI429446433	FALSE									15Gtl2#6copy	unmapped				CTTCCTCTCCTTCCTCTTCTGACTT
1178	89	106	CUST_26_PI429446421	CUST_26_PI429446421	FALSE									anti_actB	unmapped				AAAGAGCCTCAGGGCATCGGAACCG
1179	89	104	CUST_38_PI429446423	CUST_38_PI429446423	FALSE									Mettl3	unmapped				GTGATAGTCCCGTGCCTACTGCCCC
1180	89	102	(+)E1A_r60_a104	(+)E1A_r60_a104	pos
1181	89	100	CUST_77_PI429446433	CUST_77_PI429446433	FALSE									15Gtl2#6copy	unmapped				CATTCGCACCGAGAAGCACCTGGCA
1182	89	98	CUST_31_PI429446417	CUST_31_PI429446417	FALSE									#3	unmapped				CCGGCGACACCGCCTCCCGCGTCGG
1183	89	96	A_51_P455410	A_51_P455410	FALSE	NM_028780	NM_028780	74140	Tm9sf1	transmembrane 9 superfamily member 1	Mm.132857	ENSMUST00000002391		ref|NM_028780|ens|ENSMUST00000002391|ens|ENSMUST00000149726|ens|ENSMUST00000121791	chr14:56255011-56254952	mm|14qC3	Mus musculus transmembrane 9 superfamily member 1 (Tm9sf1), mRNA [NM_028780]	GO:0003674(molecular_function)|GO:0005575(cellular_component)|GO:0005764(lysosome)|GO:0006914(autophagy)|GO:0008150(biological_process)|GO:0016020(membrane)|GO:0016021(integral to membrane)|GO:0031410(cytoplasmic vesicle)	CCCATTGATTTCACTTGATAGCTTCTCTTCTGACCGAATTGTGTGATGGCATTGTCGCCT
1184	89	94	CUST_162_PI429446423	CUST_162_PI429446423	FALSE									Mettl3	unmapped				GCCAAGGAACAGTCCATTGTTGAAA
1185	89	92	CUST_12_PI429446419	CUST_12_PI429446419	FALSE									#10	unmapped				GCGGGCCGCGGCTGGCAGCGGAGGC
1186	89	90	CUST_81_PI429446423	CUST_81_PI429446423	FALSE									Mettl3	unmapped				CTCCAGAAATTTGCCGCCCAGGAGT
1187	89	88	CUST_15_PI429446417	CUST_15_PI429446417	FALSE									#3	unmapped				CTCCGGGACGCGGAGCCAGCAACTT
1188	89	86	CUST_71_PI429446426	CUST_71_PI429446426	FALSE									12Gtl2#1copy	unmapped				GCTTGCTGGCCATAGGGGGCTTACG
1189	89	84	CUST_77_PI429446428	CUST_77_PI429446428	FALSE									13Gtl2#2copy	unmapped				GGGGTCGGGAGCGAGATGGGTTGCG
1190	89	82	CUST_92_PI429446426	CUST_92_PI429446426	FALSE									12Gtl2#1copy	unmapped				AGGGCCTCTGACTTTCCTTTTAGGG
1191	89	80	CUST_5_PI429446419	CUST_5_PI429446419	FALSE									#10	unmapped				GGCCATTCAGCAGCGCCCTCAGCGG
1192	89	78	CUST_176_PI429446423	CUST_176_PI429446423	FALSE									Mettl3	unmapped				ATGGGACCAAGGAAGAGTGCATGAA
1193	89	76	CUST_124_PI429446417	CUST_124_PI429446417	FALSE									#3	unmapped				TTGTGGAAGTCCGTGGACGGCTTGG
1194	89	74	CUST_57_PI429446428	CUST_57_PI429446428	FALSE									13Gtl2#2copy	unmapped				TGTTCTATTGATGGCCGCAAGAGGG
1195	89	72	CUST_85_PI429446426	CUST_85_PI429446426	FALSE									12Gtl2#1copy	unmapped				GGGGTGGGGGGCTCTTCCAGCTTCA
1196	89	70	CUST_29_PI429446417	CUST_29_PI429446417	FALSE									#3	unmapped				GCTGCCGCCGCCGGCGACACCGCCT
1197	89	68	NA	NA	ignore
1198	89	66	CUST_47_PI429446417	CUST_47_PI429446417	FALSE									#3	unmapped				CACCGCGCGGCCCGCCTTCTTCACC
1199	89	64	CUST_6_PI429446426	CUST_6_PI429446426	FALSE									12Gtl2#1copy	unmapped				TTTTGCTGCATAATGACGTCTGTGG
1200	89	62	CUST_30_PI429446428	CUST_30_PI429446428	FALSE									13Gtl2#2copy	unmapped				TTGACTTTTGGTAAATCACCTTTTG
1201	89	60	NA	NA	ignore
1202	89	58	CUST_322_PI429446423	CUST_322_PI429446423	FALSE									Mettl3	unmapped				TGAGAGACTGTCCCCTGGCACCCGC
1203	89	56	CUST_304_PI429446423	CUST_304_PI429446423	FALSE									Mettl3	unmapped				TCAAGGATTCAACCAGGGCCTGGAC
1204	89	54	CUST_200_PI429446423	CUST_200_PI429446423	FALSE									Mettl3	unmapped				ACACATGTTTCCACATGGACACCTG
1205	89	52	CUST_70_PI429446423	CUST_70_PI429446423	FALSE									Mettl3	unmapped				TCTTGCCATCTCTACGCCAGATGCA
1206	89	50	CUST_221_PI429446423	CUST_221_PI429446423	FALSE									Mettl3	unmapped				TTGCTCTTACACAGAGTGTTGGGGG
1207	89	48	CUST_52_PI429446430	CUST_52_PI429446430	FALSE									14Gtl2#4copy	unmapped				GTGTGCATATCTGCCCCCTGGGACA
1208	89	46	CUST_28_PI429446426	CUST_28_PI429446426	FALSE									12Gtl2#1copy	unmapped				CTGACACATTCAGAAAGCTCTTTTT
1209	89	44	CUST_88_PI429446428	CUST_88_PI429446428	FALSE									13Gtl2#2copy	unmapped				TGTTAGTAGATACCTGGATTCACTA
1210	89	42	CUST_209_PI429446423	CUST_209_PI429446423	FALSE									Mettl3	unmapped				TTGATGCTTGTGTTGATTCTGAGAG
1211	89	40	CUST_203_PI429446423	CUST_203_PI429446423	FALSE									Mettl3	unmapped				TGGACACCTGCAAATATGTTCACTA
1212	89	38	CUST_32_PI429446433	CUST_32_PI429446433	FALSE									15Gtl2#6copy	unmapped				CCACCGCCACCGTCACCCCTCCCCT
1213	89	36	CUST_347_PI429446423	CUST_347_PI429446423	FALSE									Mettl3	unmapped				CCAGGTTTAAGCAAAGGTATCCGGA
1214	89	34	CUST_52_PI429446419	CUST_52_PI429446419	FALSE									#10	unmapped				GGCTCGGTGGAGGGGAGCGGAGTGG
1215	89	32	CUST_15_PI429446428	CUST_15_PI429446428	FALSE									13Gtl2#2copy	unmapped				TGGAAATTTGGAGGCAGGGTTCTTT
1216	89	30	CUST_24_PI429446417	CUST_24_PI429446417	FALSE									#3	unmapped				CCGCCGCGGGGGTGGACGAGCCGTT
1217	89	28	CUST_52_PI429446417	CUST_52_PI429446417	FALSE									#3	unmapped				TCCACGAAGGCGCTACGCTTCGCCT
1218	89	26	CUST_316_PI429446423	CUST_316_PI429446423	FALSE									Mettl3	unmapped				TCATAAACCAGATGAAATATATGGC
1219	89	24	CUST_244_PI429446423	CUST_244_PI429446423	FALSE									Mettl3	unmapped				TGTGATGGCTGACCCACCTTGGGAT
1220	89	22	CUST_60_PI429446428	CUST_60_PI429446428	FALSE									13Gtl2#2copy	unmapped				CGCAAGAGGGCGCTGGTGGCACTGC
1221	89	20	CUST_257_PI429446423	CUST_257_PI429446423	FALSE									Mettl3	unmapped				AGATGCGCAGGCTCAATATACCAGT
1222	89	18	CUST_266_PI429446423	CUST_266_PI429446423	FALSE									Mettl3	unmapped				TTTTCCTCTGGGTCACAGGAAGGGC
1223	89	16	CUST_40_PI429446423	CUST_40_PI429446423	FALSE									Mettl3	unmapped				CGTGCCTACTGCCCCTACCTCTAGC
1224	89	14	CUST_71_PI429446426	CUST_71_PI429446426	FALSE									12Gtl2#1copy	unmapped				GCTTGCTGGCCATAGGGGGCTTACG
1225	89	12	CUST_77_PI429446428	CUST_77_PI429446428	FALSE									13Gtl2#2copy	unmapped				GGGGTCGGGAGCGAGATGGGTTGCG
1226	89	10	CUST_128_PI429446417	CUST_128_PI429446417	FALSE									#3	unmapped				CTTGGCGCTGCCGGCACCCGCGGAG
1227	89	8	CUST_62_PI429446430	CUST_62_PI429446430	FALSE									14Gtl2#4copy	unmapped				GGGGCTTCCAAATTATGACATCCTT
1228	89	6	CUST_69_PI429446423	CUST_69_PI429446423	FALSE									Mettl3	unmapped				ATCCGTCTTGCCATCTCTACGCCAG
1229	89	4	CUST_118_PI429446426	CUST_118_PI429446426	FALSE									12Gtl2#1copy	unmapped				CATTCTGACCTTTTCGAGAGGACAT
1230	89	2	CUST_89_PI429446417	CUST_89_PI429446417	FALSE									#3	unmapped				GCCGCCGCCCTCCGCCGCCGCCTCC
1231	89	163	CUST_51_PI429446430	CUST_51_PI429446430	FALSE									14Gtl2#4copy	unmapped				GTGGTGTGTGCATATCTGCCCCCTG
1232	89	161	CUST_54_PI429446417	CUST_54_PI429446417	FALSE									#3	unmapped				CGCTACGCTTCGCCTCGCCAGTCTC
1233	89	159	CUST_244_PI429446423	CUST_244_PI429446423	FALSE									Mettl3	unmapped				TGTGATGGCTGACCCACCTTGGGAT
1234	89	157	CUST_54_PI429446433	CUST_54_PI429446433	FALSE									15Gtl2#6copy	unmapped				CTTTGCTTTTTCTTTTGATTCTTCA
1235	89	155	CUST_24_PI429446417	CUST_24_PI429446417	FALSE									#3	unmapped				CCGCCGCGGGGGTGGACGAGCCGTT
1236	89	153	CUST_54_PI429446426	CUST_54_PI429446426	FALSE									12Gtl2#1copy	unmapped				AGCTGCTGATCGGTAACCCTGGGCT
1237	89	151	CUST_8_PI429446423	CUST_8_PI429446423	FALSE									Mettl3	unmapped				GATCTGAATTCTCGGACACGTGGAG
1238	89	149	CUST_298_PI429446423	CUST_298_PI429446423	FALSE									Mettl3	unmapped				ACACTGCTTGGTTGGTGTTAAGGGA
1239	89	147	CUST_27_PI429446433	CUST_27_PI429446433	FALSE									15Gtl2#6copy	unmapped				TAAGATCACTGCTGCATTGCCACTG
1240	89	145	CUST_80_PI429446423	CUST_80_PI429446423	FALSE									Mettl3	unmapped				GCCTTCTCCAGAAATTTGCCGCCCA
1241	89	143	CUST_92_PI429446428	CUST_92_PI429446428	FALSE									13Gtl2#2copy	unmapped				CACTAAGGTGCGCTTGCAGGACTTA
1242	89	141	CUST_96_PI429446417	CUST_96_PI429446417	FALSE									#3	unmapped				GCCTCTTGCCTTTGCAGCCGCCGGT
1243	89	139	CUST_55_PI429446417	CUST_55_PI429446417	FALSE									#3	unmapped				CGCTTCGCCTCGCCAGTCTCCGGGC
1244	89	137	CUST_330_PI429446423	CUST_330_PI429446423	FALSE									Mettl3	unmapped				GGACGACCACACAATGTGCAGCCCA
1245	89	135	CUST_27_PI429446433	CUST_27_PI429446433	FALSE									15Gtl2#6copy	unmapped				TAAGATCACTGCTGCATTGCCACTG
1246	89	133	CUST_222_PI429446423	CUST_222_PI429446423	FALSE									Mettl3	unmapped				CTTACACAGAGTGTTGGGGGTGACT
1247	89	131	CUST_222_PI429446423	CUST_222_PI429446423	FALSE									Mettl3	unmapped				CTTACACAGAGTGTTGGGGGTGACT
1248	89	129	CUST_1_PI429446430	CUST_1_PI429446430	FALSE									14Gtl2#4copy	unmapped				TTGTATATCCAGCCGTCGATGTGGT
1249	89	127	CUST_74_PI429446433	CUST_74_PI429446433	FALSE									15Gtl2#6copy	unmapped				CTTTTCCCACTTCCTCATTCGCACC
1250	89	125	NA	NA	ignore
1251	89	123	CUST_65_PI429446426	CUST_65_PI429446426	FALSE									12Gtl2#1copy	unmapped				CCCAGGACCCGAGTCACAGTGGCAT
1252	89	121	CUST_39_PI429446423	CUST_39_PI429446423	FALSE									Mettl3	unmapped				AGTCCCGTGCCTACTGCCCCTACCT
1253	89	119	CUST_117_PI429446417	CUST_117_PI429446417	FALSE									#3	unmapped				TGCTTCCCCGGGAGTTTTCCAGTTC
1254	89	117	CUST_62_PI429446423	CUST_62_PI429446423	FALSE									Mettl3	unmapped				ATCTGGCCTTGACCTTGCCCACTGA
1255	89	115	CUST_78_PI429446430	CUST_78_PI429446430	FALSE									14Gtl2#4copy	unmapped				CCTCCCCGCTCCCCCTTTCTTCCCC
1256	89	113	CUST_125_PI429446423	CUST_125_PI429446423	FALSE									Mettl3	unmapped				CTTTAGCATCTGGTCTGGCCTCTTC
1257	89	111	NA	NA	ignore
1258	89	109	CUST_40_PI429446433	CUST_40_PI429446433	FALSE									15Gtl2#6copy	unmapped				CTTTTCATCCTTTTTCTTCCTCTCC
1259	89	107	CUST_269_PI429446423	CUST_269_PI429446423	FALSE									Mettl3	unmapped				CAGGAAGGGCCATGGAATTGGGCAG
1260	89	105	CUST_83_PI429446430	CUST_83_PI429446430	FALSE									14Gtl2#4copy	unmapped				TGCCAGGAGATGAGAAAAATTAGCT
1261	89	103	CUST_125_PI429446417	CUST_125_PI429446417	FALSE									#3	unmapped				GAAGTCCGTGGACGGCTTGGCGCTG
1262	89	101	CUST_103_PI429446417	CUST_103_PI429446417	FALSE									#3	unmapped				TCGGGACTCAGCTCCGCCTCCTGGT
1263	89	99	CUST_41_PI429446417	CUST_41_PI429446417	FALSE									#3	unmapped				GTCTGTCGCCGCCGCCTCCTCCTGC
1264	89	97	(+)E1A_r60_1	(+)E1A_r60_1	pos
1265	89	95	CUST_57_PI429446430	CUST_57_PI429446430	FALSE									14Gtl2#4copy	unmapped				GTGCCAAGAACCAAGGGTCAATAGA
1266	89	93	CUST_30_PI429446419	CUST_30_PI429446419	FALSE									#10	unmapped				CAGCCGCAGCCGGGCTCTCGCACCA
1267	89	91	CUST_137_PI429446423	CUST_137_PI429446423	FALSE									Mettl3	unmapped				CAAGGAAGCACGCTGCCTCCGATGT
1268	89	89	NA	NA	ignore
1269	89	87	CUST_220_PI429446423	CUST_220_PI429446423	FALSE									Mettl3	unmapped				GGAGCTTGCTCTTACACAGAGTGTT
1270	89	85	CUST_64_PI429446417	CUST_64_PI429446417	FALSE									#3	unmapped				CCGTTCTCCTCCAGGCCGAAGTAGC
1271	89	83	CUST_22_PI429446419	CUST_22_PI429446419	FALSE									#10	unmapped				GCCGCACGCGTCGCCTTCGCGCAGC
1272	89	81	CUST_23_PI429446433	CUST_23_PI429446433	FALSE									15Gtl2#6copy	unmapped				ACACAGTGACCAGCATCTACTAAGA
1273	89	79	CUST_30_PI429446417	CUST_30_PI429446417	FALSE									#3	unmapped				CGCCGCCGGCGACACCGCCTCCCGC
1274	89	77	CUST_119_PI429446426	CUST_119_PI429446426	FALSE									12Gtl2#1copy	unmapped				TGACCTTTTCGAGAGGACATTTGAT
1275	89	75	CUST_9_PI429446430	CUST_9_PI429446430	FALSE									14Gtl2#4copy	unmapped				TGTGGTCCTGGCTAAATCTGGTGTG
1276	89	73	CUST_120_PI429446426	CUST_120_PI429446426	FALSE									12Gtl2#1copy	unmapped				TTTTCGAGAGGACATTTGATGGACA
1277	89	71	CUST_59_PI429446430	CUST_59_PI429446430	FALSE									14Gtl2#4copy	unmapped				CCAAGGGTCAATAGAGGGGCTTCCA
1278	89	69	CUST_73_PI429446433	CUST_73_PI429446433	FALSE									15Gtl2#6copy	unmapped				TCCTCCTTTTCCCACTTCCTCATTC
1279	89	67	CUST_88_PI429446430	CUST_88_PI429446430	FALSE									14Gtl2#4copy	unmapped				TTCTCTACACCAAATTCTGCTTTGG
1280	89	65	CUST_97_PI429446433	CUST_97_PI429446433	FALSE									15Gtl2#6copy	unmapped				AAGAGCCAGTACCAGCCATGATGGG
1281	89	63	(+)E1A_r60_n11	(+)E1A_r60_n11	pos
1282	89	61	CUST_78_PI429446428	CUST_78_PI429446428	FALSE									13Gtl2#2copy	unmapped				CGGGAGCGAGATGGGTTGCGGGACC
1283	89	59	CUST_35_PI429446421	CUST_35_PI429446421	FALSE									anti_actB	unmapped				CCTGGCCGTCAGGCAGCTCATAGCT
1284	89	57	CUST_5_PI429446430	CUST_5_PI429446430	FALSE									14Gtl2#4copy	unmapped				GTGGTATTCGAGGCTGGCTGTGTGG
1285	89	55	CUST_120_PI429446426	CUST_120_PI429446426	FALSE									12Gtl2#1copy	unmapped				TTTTCGAGAGGACATTTGATGGACA
1286	89	53	CUST_120_PI429446417	CUST_120_PI429446417	FALSE									#3	unmapped				TTTCCAGTTCCCGAGCCAAGTTGTG
1287	89	51	CUST_9_PI429446430	CUST_9_PI429446430	FALSE									14Gtl2#4copy	unmapped				TGTGGTCCTGGCTAAATCTGGTGTG
1288	89	49	CUST_141_PI429446423	CUST_141_PI429446423	FALSE									Mettl3	unmapped				GATGTTGATCTGGAGATAGAAAGCC
1289	89	47	CUST_107_PI429446417	CUST_107_PI429446417	FALSE									#3	unmapped				CTGGTGGCCGCTGCCGCCACTGCCG
1290	89	45	CUST_58_PI429446419	CUST_58_PI429446419	FALSE									#10	unmapped				GCGGGATGAGGCGGCGGGATGGGAG
1291	89	43	A_51_P455410	A_51_P455410	FALSE	NM_028780	NM_028780	74140	Tm9sf1	transmembrane 9 superfamily member 1	Mm.132857	ENSMUST00000002391		ref|NM_028780|ens|ENSMUST00000002391|ens|ENSMUST00000149726|ens|ENSMUST00000121791	chr14:56255011-56254952	mm|14qC3	Mus musculus transmembrane 9 superfamily member 1 (Tm9sf1), mRNA [NM_028780]	GO:0003674(molecular_function)|GO:0005575(cellular_component)|GO:0005764(lysosome)|GO:0006914(autophagy)|GO:0008150(biological_process)|GO:0016020(membrane)|GO:0016021(integral to membrane)|GO:0031410(cytoplasmic vesicle)	CCCATTGATTTCACTTGATAGCTTCTCTTCTGACCGAATTGTGTGATGGCATTGTCGCCT
1292	89	41	CUST_59_PI429446417	CUST_59_PI429446417	FALSE									#3	unmapped				CGGGCTGGGCGGCGCGAAGAGCCGG
1293	89	39	CUST_37_PI429446419	CUST_37_PI429446419	FALSE									#10	unmapped				CGCGGAGCAGAGTGAGGGCAGTGAG
1294	89	37	CUST_10_PI429446433	CUST_10_PI429446433	FALSE									15Gtl2#6copy	unmapped				GCAAAGAGGAAGATGACAGTCATAA
1295	89	35	CUST_88_PI429446433	CUST_88_PI429446433	FALSE									15Gtl2#6copy	unmapped				CTGCCAAGAGCACCATCTTCAAGAC
1296	89	33	CUST_58_PI429446433	CUST_58_PI429446433	FALSE									15Gtl2#6copy	unmapped				CTTCATCTTCCCCTTTCTTCTCTCT
1297	89	31	CUST_68_PI429446417	CUST_68_PI429446417	FALSE									#3	unmapped				GTAGCTGCCGGCGGCGCGGTACTGC
1298	89	29	CUST_107_PI429446417	CUST_107_PI429446417	FALSE									#3	unmapped				CTGGTGGCCGCTGCCGCCACTGCCG
1299	89	27	CUST_115_PI429446423	CUST_115_PI429446423	FALSE									Mettl3	unmapped				GAAACGGCGTGCAGAACAGGATTTG
1300	89	25	CUST_39_PI429446426	CUST_39_PI429446426	FALSE									12Gtl2#1copy	unmapped				CACCCTCCGAAGTGCATCGGTTCCT
1301	89	23	CUST_24_PI429446426	CUST_24_PI429446426	FALSE									12Gtl2#1copy	unmapped				TTTTCTTTCTCTCCCAGTATCTGAC
1302	89	21	CUST_5_PI429446423	CUST_5_PI429446423	FALSE									Mettl3	unmapped				ACGATGACGACAAGGGATCTGAATT
1303	89	19	CUST_31_PI429446421	CUST_31_PI429446421	FALSE									anti_actB	unmapped				CTCGTTGCCAATAGTGATGACCTGG
1304	89	17	CUST_26_PI429446430	CUST_26_PI429446430	FALSE									14Gtl2#4copy	unmapped				CCATCATGGTGGCTGGTGCTGCTGG
1305	89	15	CUST_64_PI429446433	CUST_64_PI429446433	FALSE									15Gtl2#6copy	unmapped				CCTTTTTTCCTCCTCTATCCTTCTC
1306	89	13	CUST_20_PI429446428	CUST_20_PI429446428	FALSE									13Gtl2#2copy	unmapped				TTGGCATTGCGCATGATGGCTGCGG
1307	89	11	CUST_87_PI429446426	CUST_87_PI429446426	FALSE									12Gtl2#1copy	unmapped				GCTCTTCCAGCTTCATGTCCTCCAC
1308	89	9	CUST_74_PI429446423	CUST_74_PI429446423	FALSE									Mettl3	unmapped				ATGCACCTGCCACTCAAGATGGGGT
1309	89	7	CUST_52_PI429446433	CUST_52_PI429446433	FALSE									15Gtl2#6copy	unmapped				CCCTACACGTCTTTGCTTTTTCTTT
1310	89	5	A_51_P207591	A_51_P207591	FALSE	NM_013473	NM_013473	11752	Anxa8	annexin A8	Mm.3267	ENSMUST00000022519		ref|NM_013473|ens|ENSMUST00000022519|gb|AK075870|gb|AJ002390	chr14:34913661-34913720	mm|14qB	Mus musculus annexin A8 (Anxa8), mRNA [NM_013473]	GO:0005509(calcium ion binding)|GO:0005544(calcium-dependent phospholipid binding)|GO:0005575(cellular_component)|GO:0007596(blood coagulation)|GO:0007599(hemostasis)|GO:0046872(metal ion binding)	ATCCTCTGATCGTGGTCTCCGAGCCTGAAGAACATGACAGAACTCTTCTCAATATTCGTT
1311	89	3	CUST_90_PI429446433	CUST_90_PI429446433	FALSE									15Gtl2#6copy	unmapped				CACCATCTTCAAGACTTGGGCATGA
1312	89	1	CUST_5_PI429446430	CUST_5_PI429446430	FALSE									14Gtl2#4copy	unmapped				GTGGTATTCGAGGCTGGCTGTGTGG
1313	88	164	CUST_41_PI429446419	CUST_41_PI429446419	FALSE									#10	unmapped				GTGAGCGCAGCCGCCCAGAGCGCGG
1314	88	162	CUST_17_PI429446428	CUST_17_PI429446428	FALSE									13Gtl2#2copy	unmapped				GAGGCAGGGTTCTTTTTGGCATTGC
1315	88	160	CUST_41_PI429446430	CUST_41_PI429446430	FALSE									14Gtl2#4copy	unmapped				GGGGTGGTGTCTGTTGGTAGATGCT
1316	88	158	CUST_58_PI429446423	CUST_58_PI429446423	FALSE									Mettl3	unmapped				GTTGCTACACCACCTCTCAGATCTG
1317	88	156	CUST_68_PI429446430	CUST_68_PI429446430	FALSE									14Gtl2#4copy	unmapped				TTTTCTTACTGCTCTCTCACTTTTA
1318	88	154	ETG05_66023	ETG05_66023	pos
1319	88	152	CUST_78_PI429446423	CUST_78_PI429446423	FALSE									Mettl3	unmapped				GGGGTAGAAAGCCTTCTCCAGAAAT
1320	88	150	CUST_16_PI429446428	CUST_16_PI429446428	FALSE									13Gtl2#2copy	unmapped				ATTTGGAGGCAGGGTTCTTTTTGGC
1321	88	148	CUST_42_PI429446419	CUST_42_PI429446419	FALSE									#10	unmapped				CGCAGCCGCCCAGAGCGCGGGGCGC
1322	88	146	CUST_120_PI429446423	CUST_120_PI429446423	FALSE									Mettl3	unmapped				ACTACAGTGACCACCTTTGCCAGCT
1323	88	144	A_51_P147207	A_51_P147207	FALSE	NM_011563	NM_011563	21672	Prdx2	peroxiredoxin 2	Mm.347009	ENSMUST00000127215		ref|NM_011563|ens|ENSMUST00000127215|ens|ENSMUST00000164807|ens|ENSMUST00000109734	chr8:87498063-87498122	mm|8qC3	Mus musculus peroxiredoxin 2 (Prdx2), nuclear gene encoding mitochondrial protein, mRNA [NM_011563]	GO:0000187(activation of MAPK activity)|GO:0002536(respiratory burst involved in inflammatory response)|GO:0004601(peroxidase activity)|GO:0005515(protein binding)|GO:0005737(cytoplasm)|GO:0005739(mitochondrion)|GO:0005829(cytosol)|GO:0006979(response to oxidative stress)|GO:0008379(thioredoxin peroxidase activity)|GO:0008430(selenium binding)|GO:0010310(regulation of hydrogen peroxide metabolic …	TGCTAGATTTTCCTCCACTCTCTGAAGGGGCTGGAGTCTAGGCTGAGGTTTTCTCATTAC
1324	88	142	CUST_27_PI429446426	CUST_27_PI429446426	FALSE									12Gtl2#1copy	unmapped				AGTATCTGACACATTCAGAAAGCTC
1325	88	140	NA	NA	ignore
1326	88	138	CUST_304_PI429446423	CUST_304_PI429446423	FALSE									Mettl3	unmapped				TCAAGGATTCAACCAGGGCCTGGAC
1327	88	136	CUST_16_PI429446419	CUST_16_PI429446419	FALSE									#10	unmapped				GAGGCCGGTGCCACAGCGCTCCGTG
1328	88	134	CUST_21_PI429446433	CUST_21_PI429446433	FALSE									15Gtl2#6copy	unmapped				CACAGTTGCCACACAGTGACCAGCA
1329	88	132	CUST_18_PI429446430	CUST_18_PI429446430	FALSE									14Gtl2#4copy	unmapped				GTCTAAGTCCCTCTGTGGTGCCCTG
1330	88	130	CUST_296_PI429446423	CUST_296_PI429446423	FALSE									Mettl3	unmapped				ACGGGAAGGAACACTGCTTGGTTGG
1331	88	128	(-)3xSLv1	(-)3xSLv1	neg
1332	88	126	CUST_8_PI429446426	CUST_8_PI429446426	FALSE									12Gtl2#1copy	unmapped				TAATGACGTCTGTGGCTGGAGAAGG
1333	88	124	CUST_340_PI429446423	CUST_340_PI429446423	FALSE									Mettl3	unmapped				GGATGGGATACACCTACTAGACCCA
1334	88	122	CUST_124_PI429446423	CUST_124_PI429446423	FALSE									Mettl3	unmapped				CAGCTCTTTAGCATCTGGTCTGGCC
1335	88	120	CUST_156_PI429446423	CUST_156_PI429446423	FALSE									Mettl3	unmapped				GAGATCCTAGAGCTATTAAATACCA
1336	88	118	CUST_60_PI429446430	CUST_60_PI429446430	FALSE									14Gtl2#4copy	unmapped				GGTCAATAGAGGGGCTTCCAAATTA
1337	88	116	CUST_83_PI429446426	CUST_83_PI429446426	FALSE									12Gtl2#1copy	unmapped				CGGGGGGGTGGGGGTGGGGGGCTCT
1338	88	114	CUST_133_PI429446423	CUST_133_PI429446423	FALSE									Mettl3	unmapped				TAAGGAGCCGGCTAAGAAGTCAAGG
1339	88	112	CUST_28_PI429446433	CUST_28_PI429446433	FALSE									15Gtl2#6copy	unmapped				TCACTGCTGCATTGCCACTGCCACC
1340	88	110	CUST_33_PI429446430	CUST_33_PI429446430	FALSE									14Gtl2#4copy	unmapped				GCCAAAGCTGGCTGGGCCACTATGC
1341	88	108	CUST_44_PI429446428	CUST_44_PI429446428	FALSE									13Gtl2#2copy	unmapped				CATTCTGGGCTGGCTGGCTGAGGGG
1342	88	106	CUST_92_PI429446433	CUST_92_PI429446433	FALSE									15Gtl2#6copy	unmapped				AAGACTTGGGCATGACCCAGCCTGG
1343	88	104	CUST_243_PI429446423	CUST_243_PI429446423	FALSE									Mettl3	unmapped				GCAGTTGTGATGGCTGACCCACCTT
1344	88	102	CUST_14_PI429446426	CUST_14_PI429446426	FALSE									12Gtl2#1copy	unmapped				TTAGCTTGTCAGGGGCCTTCTTTTG
1345	88	100	CUST_26_PI429446428	CUST_26_PI429446428	FALSE									13Gtl2#2copy	unmapped				TTCTGACGTGTTGAAGGCTTTTGAC
1346	88	98	CUST_77_PI429446423	CUST_77_PI429446423	FALSE									Mettl3	unmapped				AAGATGGGGTAGAAAGCCTTCTCCA
1347	88	96	CUST_111_PI429446426	CUST_111_PI429446426	FALSE									12Gtl2#1copy	unmapped				TCACCCCAAGATAGATCCTTCGTCC
1348	88	94	CUST_3_PI429446426	CUST_3_PI429446426	FALSE									12Gtl2#1copy	unmapped				GCTGGGAGCCATGTTTTTTGCTGCA
1349	88	92	CUST_106_PI429446417	CUST_106_PI429446417	FALSE									#3	unmapped				GCCTCCTGGTGGCCGCTGCCGCCAC
1350	88	90	CUST_63_PI429446417	CUST_63_PI429446417	FALSE									#3	unmapped				GCCGGCCGTTCTCCTCCAGGCCGAA
1351	88	88	CUST_75_PI429446423	CUST_75_PI429446423	FALSE									Mettl3	unmapped				CCTGCCACTCAAGATGGGGTAGAAA
1352	88	86	CUST_17_PI429446426	CUST_17_PI429446426	FALSE									12Gtl2#1copy	unmapped				CCTTCTTTTGGGGGGCTCTTTGCAA
1353	88	84	CUST_36_PI429446417	CUST_36_PI429446417	FALSE									#3	unmapped				GGTCCTCGGCCGTGCCCCCTGCGCC
1354	88	82	CUST_62_PI429446433	CUST_62_PI429446433	FALSE									15Gtl2#6copy	unmapped				TCTCTCCTCTCCTTTTTTCCTCCTC
1355	88	80	CUST_15_PI429446426	CUST_15_PI429446426	FALSE									12Gtl2#1copy	unmapped				TTGTCAGGGGCCTTCTTTTGGGGGG
1356	88	78	CUST_89_PI429446417	CUST_89_PI429446417	FALSE									#3	unmapped				GCCGCCGCCCTCCGCCGCCGCCTCC
1357	88	76	CUST_229_PI429446423	CUST_229_PI429446423	FALSE									Mettl3	unmapped				TCGACTCTTTCCACCTCAGTGGATC
1358	88	74	CUST_61_PI429446426	CUST_61_PI429446426	FALSE									12Gtl2#1copy	unmapped				TTTTCTCAGTGCCTCTCAGCCCCAG
1359	88	72	CUST_50_PI429446430	CUST_50_PI429446430	FALSE									14Gtl2#4copy	unmapped				TGTATGTGGTGTGTGCATATCTGCC
1360	88	70	CUST_133_PI429446423	CUST_133_PI429446423	FALSE									Mettl3	unmapped				TAAGGAGCCGGCTAAGAAGTCAAGG
1361	88	68	CUST_304_PI429446423	CUST_304_PI429446423	FALSE									Mettl3	unmapped				TCAAGGATTCAACCAGGGCCTGGAC
1362	88	66	CUST_127_PI429446417	CUST_127_PI429446417	FALSE									#3	unmapped				GACGGCTTGGCGCTGCCGGCACCCG
1363	88	64	CUST_55_PI429446428	CUST_55_PI429446428	FALSE									13Gtl2#2copy	unmapped				GTTTCTAGAATGTTCTATTGATGGC
1364	88	62	CUST_35_PI429446421	CUST_35_PI429446421	FALSE									anti_actB	unmapped				CCTGGCCGTCAGGCAGCTCATAGCT
1365	88	60	CUST_68_PI429446433	CUST_68_PI429446433	FALSE									15Gtl2#6copy	unmapped				TTCTCTTTCTCCCCCCTTCTGTCTT
1366	88	58	CUST_47_PI429446428	CUST_47_PI429446428	FALSE									13Gtl2#2copy	unmapped				GGCTGAGGGGGGGGGCAGCCTGAGG
1367	88	56	CUST_3_PI429446421	CUST_3_PI429446421	FALSE									anti_actB	unmapped				GACAGCACTGTGTTGGCATAGAGGT
1368	88	54	CUST_18_PI429446419	CUST_18_PI429446419	FALSE									#10	unmapped				CCACAGCGCTCCGTGTAGACGCCGC
1369	88	52	CUST_39_PI429446419	CUST_39_PI429446419	FALSE									#10	unmapped				AGTGAGGGCAGTGAGCGCAGCCGCC
1370	88	50	CUST_151_PI429446423	CUST_151_PI429446423	FALSE									Mettl3	unmapped				ACAGCAGAGCAAGAAGGTCAGTCAG
1371	88	48	CUST_61_PI429446417	CUST_61_PI429446417	FALSE									#3	unmapped				GGCGCGAAGAGCCGGCCGTTCTCCT
1372	88	46	CUST_67_PI429446423	CUST_67_PI429446423	FALSE									Mettl3	unmapped				TGCTGTTTCCATCCGTCTTGCCATC
1373	88	44	CUST_19_PI429446421	CUST_19_PI429446421	FALSE									anti_actB	unmapped				GCCACAGGATTCCATACCCAAGAAG
1374	88	42	CUST_82_PI429446426	CUST_82_PI429446426	FALSE									12Gtl2#1copy	unmapped				GGCGGCGGGGGGGTGGGGGTGGGGG
1375	88	40	CUST_256_PI429446423	CUST_256_PI429446423	FALSE									Mettl3	unmapped				TGATGAGATGCGCAGGCTCAATATA
1376	88	38	CUST_21_PI429446433	CUST_21_PI429446433	FALSE									15Gtl2#6copy	unmapped				CACAGTTGCCACACAGTGACCAGCA
1377	88	36	CUST_24_PI429446426	CUST_24_PI429446426	FALSE									12Gtl2#1copy	unmapped				TTTTCTTTCTCTCCCAGTATCTGAC
1378	88	34	CUST_150_PI429446423	CUST_150_PI429446423	FALSE									Mettl3	unmapped				AAAGAACAGCAGAGCAAGAAGGTCA
1379	88	32	CUST_9_PI429446421	CUST_9_PI429446421	FALSE									anti_actB	unmapped				CGGATGTCAACGTCACACTTCATGA
1380	88	30	CUST_57_PI429446426	CUST_57_PI429446426	FALSE									12Gtl2#1copy	unmapped				ACCCTGGGCTCAGCGGTGGCTTTTC
1381	88	28	CUST_345_PI429446423	CUST_345_PI429446423	FALSE									Mettl3	unmapped				GATGTGGTTGCCAGGTTTAAGCAAA
1382	88	26	CUST_60_PI429446426	CUST_60_PI429446426	FALSE									12Gtl2#1copy	unmapped				GTGGCTTTTCTCAGTGCCTCTCAGC
1383	88	24	CUST_6_PI429446417	CUST_6_PI429446417	FALSE									#3	unmapped				TGCCGCGCGCGGGGCTCCCGCCCTC
1384	88	22	CUST_35_PI429446421	CUST_35_PI429446421	FALSE									anti_actB	unmapped				CCTGGCCGTCAGGCAGCTCATAGCT
1385	88	20	CUST_44_PI429446428	CUST_44_PI429446428	FALSE									13Gtl2#2copy	unmapped				CATTCTGGGCTGGCTGGCTGAGGGG
1386	88	18	CUST_50_PI429446428	CUST_50_PI429446428	FALSE									13Gtl2#2copy	unmapped				CAGCCTGAGGGCTGCGACGTGGCAG
1387	88	16	CUST_328_PI429446423	CUST_328_PI429446423	FALSE									Mettl3	unmapped				TGAGTTATTTGGACGACCACACAAT
1388	88	14	CUST_15_PI429446428	CUST_15_PI429446428	FALSE									13Gtl2#2copy	unmapped				TGGAAATTTGGAGGCAGGGTTCTTT
1389	88	12	CUST_8_PI429446426	CUST_8_PI429446426	FALSE									12Gtl2#1copy	unmapped				TAATGACGTCTGTGGCTGGAGAAGG
1390	88	10	CUST_162_PI429446423	CUST_162_PI429446423	FALSE									Mettl3	unmapped				GCCAAGGAACAGTCCATTGTTGAAA
1391	88	8	CUST_48_PI429446419	CUST_48_PI429446419	FALSE									#10	unmapped				ATGCATGGCGCCGGGTGGACGGCTC
1392	88	6	CUST_102_PI429446433	CUST_102_PI429446433	FALSE									15Gtl2#6copy	unmapped				GACTTTGGCATGTGTGATTGAGTCG
1393	88	4	CUST_107_PI429446426	CUST_107_PI429446426	FALSE									12Gtl2#1copy	unmapped				TCACAGTTGCCACCCACCTGTCACC
1394	88	2	CUST_32_PI429446430	CUST_32_PI429446430	FALSE									14Gtl2#4copy	unmapped				TGAAGGCCAAAGCTGGCTGGGCCAC
1395	88	163	CUST_14_PI429446423	CUST_14_PI429446423	FALSE									Mettl3	unmapped				TCCAGGCCCATAAGAAACAGCTGGA
1396	88	161	CUST_274_PI429446423	CUST_274_PI429446423	FALSE									Mettl3	unmapped				AGAATGTCTGAACCTCTGGGGTTAT
1397	88	159	CUST_7_PI429446417	CUST_7_PI429446417	FALSE									#3	unmapped				CGCGCGGGGCTCCCGCCCTCCAGCC
1398	88	157	A_51_P406105	A_51_P406105	FALSE	NR_003634	NR_003634	66184	Rps4y2	ribosomal protein S4, Y-linked 2	Mm.391542	ENSMUST00000071745		ref|NR_003634|ens|ENSMUST00000071745|gb|AK012382|gb|AK004068	chr6:148304018-148304077	mm|6qG3	Mus musculus ribosomal protein S4, Y-linked 2 (Rps4y2), non-coding RNA [NR_003634]	GO:0003674(molecular_function)|GO:0005575(cellular_component)|GO:0005840(ribosome)|GO:0008150(biological_process)	TGAAGTGGACTCTGAGGGACATTGCGGGGAAGGGGCGTTTACGTTTGTTTATACTTAAAA
1399	88	155	CUST_20_PI429446428	CUST_20_PI429446428	FALSE									13Gtl2#2copy	unmapped				TTGGCATTGCGCATGATGGCTGCGG
1400	88	153	CUST_97_PI429446417	CUST_97_PI429446417	FALSE									#3	unmapped				TTGCCTTTGCAGCCGCCGGTGGCGA
1401	88	151	CUST_118_PI429446423	CUST_118_PI429446423	FALSE									Mettl3	unmapped				ACAGGATTTGACTACAGTGACCACC
1402	88	149	CUST_83_PI429446430	CUST_83_PI429446430	FALSE									14Gtl2#4copy	unmapped				TGCCAGGAGATGAGAAAAATTAGCT
1403	88	147	CUST_62_PI429446423	CUST_62_PI429446423	FALSE									Mettl3	unmapped				ATCTGGCCTTGACCTTGCCCACTGA
1404	88	145	CUST_76_PI429446428	CUST_76_PI429446428	FALSE									13Gtl2#2copy	unmapped				AGGAGGGGGTCGGGAGCGAGATGGG
1405	88	143	CUST_44_PI429446423	CUST_44_PI429446423	FALSE									Mettl3	unmapped				CTAGCGGCCCTAAGCCCAGCACAAC
1406	88	141	CUST_220_PI429446423	CUST_220_PI429446423	FALSE									Mettl3	unmapped				GGAGCTTGCTCTTACACAGAGTGTT
1407	88	139	CUST_207_PI429446423	CUST_207_PI429446423	FALSE									Mettl3	unmapped				CACTATGAAATTGATGCTTGTGTTG
1408	88	137	CUST_243_PI429446423	CUST_243_PI429446423	FALSE									Mettl3	unmapped				GCAGTTGTGATGGCTGACCCACCTT
1409	88	135	CUST_90_PI429446428	CUST_90_PI429446428	FALSE									13Gtl2#2copy	unmapped				TACCTGGATTCACTAAGGTGCGCTT
1410	88	133	CUST_35_PI429446426	CUST_35_PI429446426	FALSE									12Gtl2#1copy	unmapped				AAGCCCTAAACCTTCATTTTCACCC
1411	88	131	CUST_2_PI429446430	CUST_2_PI429446430	FALSE									14Gtl2#4copy	unmapped				TATCCAGCCGTCGATGTGGTATTCG
1412	88	129	CUST_57_PI429446419	CUST_57_PI429446419	FALSE									#10	unmapped				AGCACGCGGGATGAGGCGGCGGGAT
1413	88	127	CUST_159_PI429446423	CUST_159_PI429446423	FALSE									Mettl3	unmapped				TTAAATACCACAACAGCCAAGGAAC
1414	88	125	CUST_69_PI429446430	CUST_69_PI429446430	FALSE									14Gtl2#4copy	unmapped				TTACTGCTCTCTCACTTTTAGCTGG
1415	88	123	CUST_269_PI429446423	CUST_269_PI429446423	FALSE									Mettl3	unmapped				CAGGAAGGGCCATGGAATTGGGCAG
1416	88	121	CUST_5_PI429446419	CUST_5_PI429446419	FALSE									#10	unmapped				GGCCATTCAGCAGCGCCCTCAGCGG
1417	88	119	CUST_65_PI429446426	CUST_65_PI429446426	FALSE									12Gtl2#1copy	unmapped				CCCAGGACCCGAGTCACAGTGGCAT
1418	88	117	CUST_37_PI429446417	CUST_37_PI429446417	FALSE									#3	unmapped				TCGGCCGTGCCCCCTGCGCCGTCTG
1419	88	115	CUST_323_PI429446423	CUST_323_PI429446423	FALSE									Mettl3	unmapped				GACTGTCCCCTGGCACCCGCAAGAT
1420	88	113	CUST_6_PI429446426	CUST_6_PI429446426	FALSE									12Gtl2#1copy	unmapped				TTTTGCTGCATAATGACGTCTGTGG
1421	88	111	CUST_28_PI429446426	CUST_28_PI429446426	FALSE									12Gtl2#1copy	unmapped				CTGACACATTCAGAAAGCTCTTTTT
1422	88	109	CUST_120_PI429446417	CUST_120_PI429446417	FALSE									#3	unmapped				TTTCCAGTTCCCGAGCCAAGTTGTG
1423	88	107	CUST_37_PI429446419	CUST_37_PI429446419	FALSE									#10	unmapped				CGCGGAGCAGAGTGAGGGCAGTGAG
1424	88	105	CUST_161_PI429446423	CUST_161_PI429446423	FALSE									Mettl3	unmapped				CAACAGCCAAGGAACAGTCCATTGT
1425	88	103	NA	NA	ignore
1426	88	101	CUST_161_PI429446423	CUST_161_PI429446423	FALSE									Mettl3	unmapped				CAACAGCCAAGGAACAGTCCATTGT
1427	88	99	CUST_141_PI429446423	CUST_141_PI429446423	FALSE									Mettl3	unmapped				GATGTTGATCTGGAGATAGAAAGCC
1428	88	97	CUST_119_PI429446426	CUST_119_PI429446426	FALSE									12Gtl2#1copy	unmapped				TGACCTTTTCGAGAGGACATTTGAT
1429	88	95	CUST_145_PI429446423	CUST_145_PI429446423	FALSE									Mettl3	unmapped				AAGCCTTTTGAACCAACAGTCAACG
1430	88	93	CUST_13_PI429446428	CUST_13_PI429446428	FALSE									13Gtl2#2copy	unmapped				ATCTGAGTGCTGGAAATTTGGAGGC
1431	88	91	(+)E1A_r60_a20	(+)E1A_r60_a20	pos
1432	88	89	CUST_61_PI429446426	CUST_61_PI429446426	FALSE									12Gtl2#1copy	unmapped				TTTTCTCAGTGCCTCTCAGCCCCAG
1433	88	87	CUST_181_PI429446423	CUST_181_PI429446423	FALSE									Mettl3	unmapped				AGCCAGTGACGCTGACCGGCCTTGT
1434	88	85	CUST_27_PI429446423	CUST_27_PI429446423	FALSE									Mettl3	unmapped				TCTGGGCACTTGGATTTAAGGAACC
1435	88	83	CUST_66_PI429446423	CUST_66_PI429446423	FALSE									Mettl3	unmapped				ACTGATGCTGTTTCCATCCGTCTTG
1436	88	81	CUST_20_PI429446426	CUST_20_PI429446426	FALSE									12Gtl2#1copy	unmapped				CTCTTTGCAAAAATGGGGTGTTTTC
1437	88	79	CUST_24_PI429446421	CUST_24_PI429446421	FALSE									anti_actB	unmapped				GAAGGCTGGAAAAGAGCCTCAGGGC
1438	88	77	NA	NA	ignore
1439	88	75	CUST_9_PI429446417	CUST_9_PI429446417	FALSE									#3	unmapped				TCCCGCCCTCCAGCCGTCCGGGCAG
1440	88	73	CUST_38_PI429446419	CUST_38_PI429446419	FALSE									#10	unmapped				AGCAGAGTGAGGGCAGTGAGCGCAG
1441	88	71	CUST_49_PI429446417	CUST_49_PI429446417	FALSE									#3	unmapped				CCCGCCTTCTTCACCTCCACGAAGG
1442	88	69	CUST_72_PI429446423	CUST_72_PI429446423	FALSE									Mettl3	unmapped				TCTACGCCAGATGCACCTGCCACTC
1443	88	67	CUST_20_PI429446423	CUST_20_PI429446423	FALSE									Mettl3	unmapped				TTCGCGAGAGATTGCAGCGGCGACG
1444	88	65	CUST_119_PI429446423	CUST_119_PI429446423	FALSE									Mettl3	unmapped				ATTTGACTACAGTGACCACCTTTGC
1445	88	63	CUST_7_PI429446430	CUST_7_PI429446430	FALSE									14Gtl2#4copy	unmapped				AGGCTGGCTGTGTGGTCCTGGCTAA
1446	88	61	CUST_107_PI429446433	CUST_107_PI429446433	FALSE									15Gtl2#6copy	unmapped				CAGTGCAGACAACCGTGAGAAGACA
1447	88	59	CUST_58_PI429446430	CUST_58_PI429446430	FALSE									14Gtl2#4copy	unmapped				AAGAACCAAGGGTCAATAGAGGGGC
1448	88	57	CUST_210_PI429446423	CUST_210_PI429446423	FALSE									Mettl3	unmapped				GCTTGTGTTGATTCTGAGAGTCCTG
1449	88	55	CUST_7_PI429446426	CUST_7_PI429446426	FALSE									12Gtl2#1copy	unmapped				CTGCATAATGACGTCTGTGGCTGGA
1450	88	53	CUST_49_PI429446428	CUST_49_PI429446428	FALSE									13Gtl2#2copy	unmapped				GGGGGCAGCCTGAGGGCTGCGACGT
1451	88	51	CUST_17_PI429446423	CUST_17_PI429446423	FALSE									Mettl3	unmapped				AACAGCTGGACTCGCTTCGCGAGAG
1452	88	49	CUST_16_PI429446433	CUST_16_PI429446433	FALSE									15Gtl2#6copy	unmapped				ACAGCTGCCACATGTCTACCAAGAC
1453	88	47	NA	NA	ignore
1454	88	45	CUST_163_PI429446423	CUST_163_PI429446423	FALSE									Mettl3	unmapped				GGAACAGTCCATTGTTGAAAAGTTT
1455	88	43	CUST_145_PI429446423	CUST_145_PI429446423	FALSE									Mettl3	unmapped				AAGCCTTTTGAACCAACAGTCAACG
1456	88	41	NA	NA	ignore
1457	88	39	CUST_249_PI429446423	CUST_249_PI429446423	FALSE									Mettl3	unmapped				ATTCACATGGAGCTACCGTATGGGA
1458	88	37	CUST_18_PI429446419	CUST_18_PI429446419	FALSE									#10	unmapped				CCACAGCGCTCCGTGTAGACGCCGC
1459	88	35	CUST_27_PI429446433	CUST_27_PI429446433	FALSE									15Gtl2#6copy	unmapped				TAAGATCACTGCTGCATTGCCACTG
1460	88	33	CUST_96_PI429446433	CUST_96_PI429446433	FALSE									15Gtl2#6copy	unmapped				CCTGGAAGAGCCAGTACCAGCCATG
1461	88	31	(+)E1A_r60_a20	(+)E1A_r60_a20	pos
1462	88	29	CUST_103_PI429446423	CUST_103_PI429446423	FALSE									Mettl3	unmapped				GATGGGGGCTGTGGCAGAAAAGAAA
1463	88	27	CUST_33_PI429446426	CUST_33_PI429446426	FALSE									12Gtl2#1copy	unmapped				GATGCCCCCAAAGCCCTAAACCTTC
1464	88	25	CUST_44_PI429446426	CUST_44_PI429446426	FALSE									12Gtl2#1copy	unmapped				ACCTTAACAACGCCCCCACCCCTGA
1465	88	23	CUST_51_PI429446428	CUST_51_PI429446428	FALSE									13Gtl2#2copy	unmapped				TGAGGGCTGCGACGTGGCAGGTTTC
1466	88	21	CUST_84_PI429446423	CUST_84_PI429446423	FALSE									Mettl3	unmapped				GCCCAGGAGTTGATTGAGGTAAAGC
1467	88	19	CUST_122_PI429446423	CUST_122_PI429446423	FALSE									Mettl3	unmapped				CCACCTTTGCCAGCTCTTTAGCATC
1468	88	17	CUST_53_PI429446433	CUST_53_PI429446433	FALSE									15Gtl2#6copy	unmapped				CACGTCTTTGCTTTTTCTTTTGATT
1469	88	15	CUST_68_PI429446417	CUST_68_PI429446417	FALSE									#3	unmapped				GTAGCTGCCGGCGGCGCGGTACTGC
1470	88	13	CUST_22_PI429446417	CUST_22_PI429446417	FALSE									#3	unmapped				CCAGGCGACCCCGCCGCGGGGGTGG
1471	88	11	CUST_11_PI429446417	CUST_11_PI429446417	FALSE									#3	unmapped				CAGCCGTCCGGGCAGAGAGCCTCCG
1472	88	9	CUST_80_PI429446433	CUST_80_PI429446433	FALSE									15Gtl2#6copy	unmapped				GCACCTGGCAAGTGCAGCTGCATGC
1473	88	7	CUST_76_PI429446426	CUST_76_PI429446426	FALSE									12Gtl2#1copy	unmapped				CGAAAGCAGCTGCAGAGGCGTAAAT
1474	88	5	CUST_99_PI429446433	CUST_99_PI429446433	FALSE									15Gtl2#6copy	unmapped				ACCAGCCATGATGGGGACTTTGGCA
1475	88	3	CUST_27_PI429446433	CUST_27_PI429446433	FALSE									15Gtl2#6copy	unmapped				TAAGATCACTGCTGCATTGCCACTG
1476	88	1	CUST_65_PI429446430	CUST_65_PI429446430	FALSE									14Gtl2#4copy	unmapped				TGACATCCTTGAATTTTTTCTTACT
1477	87	164	A_51_P112223	A_51_P112223	FALSE	NM_010357	NM_010357	14860	Gsta4	glutathione S-transferase, alpha 4	Mm.2662	ENSMUST00000034903		ref|NM_010357|ens|ENSMUST00000034903|gb|AK008400|gb|AK008189	chr9:78046172-78047344	mm|9qE1	Mus musculus glutathione S-transferase, alpha 4 (Gsta4), mRNA [NM_010357]	GO:0004364(glutathione transferase activity)|GO:0005737(cytoplasm)|GO:0005739(mitochondrion)|GO:0006749(glutathione metabolic process)|GO:0006805(xenobiotic metabolic process)|GO:0008144(drug binding)|GO:0008152(metabolic process)|GO:0016740(transferase activity)|GO:0042803(protein homodimerization activity)|GO:0043295(glutathione binding)	GCTGGAGTGGAGTTTGAGGAAGAATTTCTTGAGACAAGGGAACAGTATGAGAAGATGCAA
1478	87	162	CUST_10_PI429446417	CUST_10_PI429446417	FALSE									#3	unmapped				CCCTCCAGCCGTCCGGGCAGAGAGC
1479	87	160	CUST_76_PI429446417	CUST_76_PI429446417	FALSE									#3	unmapped				AACTCCTCCTTGGAGGTCGCCAGCG
1480	87	158	CUST_12_PI429446430	CUST_12_PI429446430	FALSE									14Gtl2#4copy	unmapped				ATCTGGTGTGGTTCATTCATGCATG
1481	87	156	CUST_28_PI429446423	CUST_28_PI429446423	FALSE									Mettl3	unmapped				GCACTTGGATTTAAGGAACCCAGAA
1482	87	154	CUST_86_PI429446428	CUST_86_PI429446428	FALSE									13Gtl2#2copy	unmapped				TATGGGGAAATGTTAGTAGATACCT
1483	87	152	CUST_54_PI429446426	CUST_54_PI429446426	FALSE									12Gtl2#1copy	unmapped				AGCTGCTGATCGGTAACCCTGGGCT
1484	87	150	CUST_123_PI429446423	CUST_123_PI429446423	FALSE									Mettl3	unmapped				TTTGCCAGCTCTTTAGCATCTGGTC
1485	87	148	CUST_12_PI429446430	CUST_12_PI429446430	FALSE									14Gtl2#4copy	unmapped				ATCTGGTGTGGTTCATTCATGCATG
1486	87	146	CUST_38_PI429446423	CUST_38_PI429446423	FALSE									Mettl3	unmapped				GTGATAGTCCCGTGCCTACTGCCCC
1487	87	144	CUST_83_PI429446423	CUST_83_PI429446423	FALSE									Mettl3	unmapped				TTGCCGCCCAGGAGTTGATTGAGGT
1488	87	142	CUST_335_PI429446423	CUST_335_PI429446423	FALSE									Mettl3	unmapped				ACTGGATTACTCTTGGAAACCAACT
1489	87	140	CUST_57_PI429446423	CUST_57_PI429446423	FALSE									Mettl3	unmapped				AAGAAGTTGCTACACCACCTCTCAG
1490	87	138	CUST_38_PI429446419	CUST_38_PI429446419	FALSE									#10	unmapped				AGCAGAGTGAGGGCAGTGAGCGCAG
1491	87	136	CUST_69_PI429446430	CUST_69_PI429446430	FALSE									14Gtl2#4copy	unmapped				TTACTGCTCTCTCACTTTTAGCTGG
1492	87	134	CUST_178_PI429446423	CUST_178_PI429446423	FALSE									Mettl3	unmapped				GGAAGAGTGCATGAAAGCCAGTGAC
1493	87	132	CUST_19_PI429446421	CUST_19_PI429446421	FALSE									anti_actB	unmapped				GCCACAGGATTCCATACCCAAGAAG
1494	87	130	CUST_44_PI429446430	CUST_44_PI429446430	FALSE									14Gtl2#4copy	unmapped				GGTAGATGCTTCTTCAAGCTTGTGT
1495	87	128	CUST_32_PI429446428	CUST_32_PI429446428	FALSE									13Gtl2#2copy	unmapped				GTAAATCACCTTTTGCCGTTTCCTT
1496	87	126	CUST_224_PI429446423	CUST_224_PI429446423	FALSE									Mettl3	unmapped				GTGTTGGGGGTGACTCCAGTGCTGA
1497	87	124	CUST_17_PI429446426	CUST_17_PI429446426	FALSE									12Gtl2#1copy	unmapped				CCTTCTTTTGGGGGGCTCTTTGCAA
1498	87	122	CUST_96_PI429446433	CUST_96_PI429446433	FALSE									15Gtl2#6copy	unmapped				CCTGGAAGAGCCAGTACCAGCCATG
1499	87	120	CUST_77_PI429446433	CUST_77_PI429446433	FALSE									15Gtl2#6copy	unmapped				CATTCGCACCGAGAAGCACCTGGCA
1500	87	118	CUST_66_PI429446417	CUST_66_PI429446417	FALSE									#3	unmapped				CCAGGCCGAAGTAGCTGCCGGCGGC
1501	87	116	CUST_85_PI429446428	CUST_85_PI429446428	FALSE									13Gtl2#2copy	unmapped				TTACCTATGGGGAAATGTTAGTAGA
1502	87	114	CUST_95_PI429446417	CUST_95_PI429446417	FALSE									#3	unmapped				GAACCGCCTCTTGCCTTTGCAGCCG
1503	87	112	CUST_197_PI429446423	CUST_197_PI429446423	FALSE									Mettl3	unmapped				ACTGCTCTTTCCTTAACACATGTTT
1504	87	110	CUST_347_PI429446423	CUST_347_PI429446423	FALSE									Mettl3	unmapped				CCAGGTTTAAGCAAAGGTATCCGGA
1505	87	108	CUST_46_PI429446423	CUST_46_PI429446423	FALSE									Mettl3	unmapped				TAAGCCCAGCACAACATCTGTGGCC
1506	87	106	(+)E1A_r60_a135	(+)E1A_r60_a135	pos
1507	87	104	CUST_79_PI429446433	CUST_79_PI429446433	FALSE									15Gtl2#6copy	unmapped				GAGAAGCACCTGGCAAGTGCAGCTG
1508	87	102	CUST_20_PI429446419	CUST_20_PI429446419	FALSE									#10	unmapped				CCGTGTAGACGCCGCACGCGTCGCC
1509	87	100	CUST_59_PI429446426	CUST_59_PI429446426	FALSE									12Gtl2#1copy	unmapped				CAGCGGTGGCTTTTCTCAGTGCCTC
1510	87	98	CUST_86_PI429446433	CUST_86_PI429446433	FALSE									15Gtl2#6copy	unmapped				TGAACACCCCCTGCCAAGAGCACCA
1511	87	96	CUST_92_PI429446428	CUST_92_PI429446428	FALSE									13Gtl2#2copy	unmapped				CACTAAGGTGCGCTTGCAGGACTTA
1512	87	94	CUST_54_PI429446419	CUST_54_PI429446419	FALSE									#10	unmapped				AGGGGAGCGGAGTGGAGCACGCGGG
1513	87	92	NA	NA	ignore
1514	87	90	CUST_35_PI429446423	CUST_35_PI429446423	FALSE									Mettl3	unmapped				CCCCAACCTTCCGTAGTGATAGTCC
1515	87	88	CUST_22_PI429446428	CUST_22_PI429446428	FALSE									13Gtl2#2copy	unmapped				GCATGATGGCTGCGGCTAGATTCTG
1516	87	86	CUST_1_PI429446430	CUST_1_PI429446430	FALSE									14Gtl2#4copy	unmapped				TTGTATATCCAGCCGTCGATGTGGT
1517	87	84	CUST_105_PI429446433	CUST_105_PI429446433	FALSE									15Gtl2#6copy	unmapped				GATTGAGTCGCAGTGCAGACAACCG
1518	87	82	CUST_41_PI429446419	CUST_41_PI429446419	FALSE									#10	unmapped				GTGAGCGCAGCCGCCCAGAGCGCGG
1519	87	80	CUST_173_PI429446423	CUST_173_PI429446423	FALSE									Mettl3	unmapped				AAGAATTTTGTGATTATGGGACCAA
1520	87	78	CUST_55_PI429446428	CUST_55_PI429446428	FALSE									13Gtl2#2copy	unmapped				GTTTCTAGAATGTTCTATTGATGGC
1521	87	76	CUST_26_PI429446419	CUST_26_PI429446419	FALSE									#10	unmapped				GCAGCGCGCAAGTCAGGCAGCAGCC
1522	87	74	CUST_13_PI429446423	CUST_13_PI429446423	FALSE									Mettl3	unmapped				CTCTATCCAGGCCCATAAGAAACAG
1523	87	72	CUST_345_PI429446423	CUST_345_PI429446423	FALSE									Mettl3	unmapped				GATGTGGTTGCCAGGTTTAAGCAAA
1524	87	70	CUST_15_PI429446426	CUST_15_PI429446426	FALSE									12Gtl2#1copy	unmapped				TTGTCAGGGGCCTTCTTTTGGGGGG
1525	87	68	CUST_260_PI429446423	CUST_260_PI429446423	FALSE									Mettl3	unmapped				ATATACCAGTGCTACAGGATGACGG
1526	87	66	CUST_303_PI429446423	CUST_303_PI429446423	FALSE									Mettl3	unmapped				AATCCTCAAGGATTCAACCAGGGCC
1527	87	64	CUST_67_PI429446417	CUST_67_PI429446417	FALSE									#3	unmapped				CCGAAGTAGCTGCCGGCGGCGCGGT
1528	87	62	CUST_3_PI429446423	CUST_3_PI429446423	FALSE									Mettl3	unmapped				GACTACAAAGACGATGACGACAAGG
1529	87	60	CUST_129_PI429446423	CUST_129_PI429446423	FALSE									Mettl3	unmapped				TCTTCAGCATCAGAACCAGCTAAGG
1530	87	58	CUST_109_PI429446426	CUST_109_PI429446426	FALSE									12Gtl2#1copy	unmapped				CACCCACCTGTCACCCCAAGATAGA
1531	87	56	CUST_35_PI429446433	CUST_35_PI429446433	FALSE									15Gtl2#6copy	unmapped				CCCCTCCCCTTCTCTCCTCTTCCCT
1532	87	54	CUST_29_PI429446423	CUST_29_PI429446423	FALSE									Mettl3	unmapped				TGGATTTAAGGAACCCAGAAGCGGC
1533	87	52	CUST_73_PI429446423	CUST_73_PI429446423	FALSE									Mettl3	unmapped				GCCAGATGCACCTGCCACTCAAGAT
1534	87	50	CUST_85_PI429446428	CUST_85_PI429446428	FALSE									13Gtl2#2copy	unmapped				TTACCTATGGGGAAATGTTAGTAGA
1535	87	48	CUST_9_PI429446421	CUST_9_PI429446421	FALSE									anti_actB	unmapped				CGGATGTCAACGTCACACTTCATGA
1536	87	46	CUST_54_PI429446428	CUST_54_PI429446428	FALSE									13Gtl2#2copy	unmapped				GGCAGGTTTCTAGAATGTTCTATTG
1537	87	44	CUST_77_PI429446430	CUST_77_PI429446430	FALSE									14Gtl2#4copy	unmapped				GTTCTCCTCCCCGCTCCCCCTTTCT
1538	87	42	CUST_14_PI429446428	CUST_14_PI429446428	FALSE									13Gtl2#2copy	unmapped				AGTGCTGGAAATTTGGAGGCAGGGT
1539	87	40	CUST_115_PI429446417	CUST_115_PI429446417	FALSE									#3	unmapped				ACGCAACTGCTGCTTCCCCGGGAGT
1540	87	38	A_51_P309854	A_51_P309854	FALSE	NM_080465	NM_080465	140492	Kcnn2	potassium intermediate/small conductance calcium-activated channel, subfamily N, member 2	Mm.458654	ENSMUST00000169783		ref|NM_080465|ens|ENSMUST00000169783|ens|ENSMUST00000066890|gb|AK149082	chr18:45845292-45845351	mm|18qC	Mus musculus potassium intermediate/small conductance calcium-activated channel, subfamily N, member 2 (Kcnn2), mRNA [NM_080465]	GO:0005216(ion channel activity)|GO:0005516(calmodulin binding)|GO:0005790(smooth endoplasmic reticulum)|GO:0005886(plasma membrane)|GO:0006810(transport)|GO:0006811(ion transport)|GO:0006813(potassium ion transport)|GO:0015269(calcium-activated potassium channel activity)|GO:0016020(membrane)|GO:0016021(integral to membrane)|GO:0016286(small conductance calcium-activated potassium channel activi…	CTATGGTTCTAATCAGCGTTATCCGGGTTCTGATGTCAGAATCTTGGGAACCTGAACACT
1541	87	36	CUST_90_PI429446423	CUST_90_PI429446423	FALSE									Mettl3	unmapped				CTCCTCCAAGATGATGCACATCCTA
1542	87	34	CUST_85_PI429446428	CUST_85_PI429446428	FALSE									13Gtl2#2copy	unmapped				TTACCTATGGGGAAATGTTAGTAGA
1543	87	32	NA	NA	ignore
1544	87	30	CUST_52_PI429446417	CUST_52_PI429446417	FALSE									#3	unmapped				TCCACGAAGGCGCTACGCTTCGCCT
1545	87	28	CUST_313_PI429446423	CUST_313_PI429446423	FALSE									Mettl3	unmapped				GGTTCGTTCCACCAGTCATAAACCA
1546	87	26	CUST_146_PI429446423	CUST_146_PI429446423	FALSE									Mettl3	unmapped				TTTTGAACCAACAGTCAACGAAAGA
1547	87	24	CUST_37_PI429446423	CUST_37_PI429446423	FALSE									Mettl3	unmapped				CCGTAGTGATAGTCCCGTGCCTACT
1548	87	22	CUST_118_PI429446426	CUST_118_PI429446426	FALSE									12Gtl2#1copy	unmapped				CATTCTGACCTTTTCGAGAGGACAT
1549	87	20	CUST_125_PI429446417	CUST_125_PI429446417	FALSE									#3	unmapped				GAAGTCCGTGGACGGCTTGGCGCTG
1550	87	18	CUST_270_PI429446423	CUST_270_PI429446423	FALSE									Mettl3	unmapped				AGGGCCATGGAATTGGGCAGAGAAT
1551	87	16	CUST_18_PI429446419	CUST_18_PI429446419	FALSE									#10	unmapped				CCACAGCGCTCCGTGTAGACGCCGC
1552	87	14	CUST_9_PI429446423	CUST_9_PI429446423	FALSE									Mettl3	unmapped				GAATTCTCGGACACGTGGAGCTCTA
1553	87	12	CUST_116_PI429446423	CUST_116_PI429446423	FALSE									Mettl3	unmapped				GGCGTGCAGAACAGGATTTGACTAC
1554	87	10	CUST_177_PI429446423	CUST_177_PI429446423	FALSE									Mettl3	unmapped				ACCAAGGAAGAGTGCATGAAAGCCA
1555	87	8	CUST_35_PI429446426	CUST_35_PI429446426	FALSE									12Gtl2#1copy	unmapped				AAGCCCTAAACCTTCATTTTCACCC
1556	87	6	CUST_43_PI429446419	CUST_43_PI429446419	FALSE									#10	unmapped				CCGCCCAGAGCGCGGGGCGCGCGGG
1557	87	4	CUST_25_PI429446423	CUST_25_PI429446423	FALSE									Mettl3	unmapped				GAAGCAGGACTCTGGGCACTTGGAT
1558	87	2	CUST_179_PI429446423	CUST_179_PI429446423	FALSE									Mettl3	unmapped				AGTGCATGAAAGCCAGTGACGCTGA
1559	87	163	CUST_333_PI429446423	CUST_333_PI429446423	FALSE									Mettl3	unmapped				GTGCAGCCCAACTGGATTACTCTTG
1560	87	161	CUST_114_PI429446423	CUST_114_PI429446423	FALSE									Mettl3	unmapped				GGGCAGAAACGGCGTGCAGAACAGG
1561	87	159	CUST_40_PI429446421	CUST_40_PI429446421	FALSE									anti_actB	unmapped				CTTCTCCAGGGAGGAAGAGGATGCG
1562	87	157	A_51_P279552	A_51_P279552	FALSE	NM_016900	NM_016900	12390	Cav2	caveolin 2	Mm.396075	ENSMUST00000000058		ref|NM_016900|ens|ENSMUST00000000058|gb|AF141322|gb|AK151397	chr6:17238393-17238452	mm|6qA2	Mus musculus caveolin 2 (Cav2), mRNA [NM_016900]	GO:0000149(SNARE binding)|GO:0001937(negative regulation of endothelial cell proliferation)|GO:0001938(positive regulation of endothelial cell proliferation)|GO:0002080(acrosomal membrane)|GO:0005622(intracellular)|GO:0005634(nucleus)|GO:0005737(cytoplasm)|GO:0005794(Golgi apparatus)|GO:0005811(lipid particle)|GO:0005829(cytosol)|GO:0005886(plasma membrane)|GO:0005887(integral to plasma membrane)…	TTATAGGTCATTGAACTGGGATTCTATTGCAGACCAGGTCAAAATATCATATTAAGAGAC
1563	87	155	CUST_79_PI429446433	CUST_79_PI429446433	FALSE									15Gtl2#6copy	unmapped				GAGAAGCACCTGGCAAGTGCAGCTG
1564	87	153	CUST_64_PI429446430	CUST_64_PI429446430	FALSE									14Gtl2#4copy	unmapped				AATTATGACATCCTTGAATTTTTTC
1565	87	151	CUST_21_PI429446430	CUST_21_PI429446430	FALSE									14Gtl2#4copy	unmapped				TGGTGCCCTGGCCTTCCCTTCCTTT
1566	87	149	CUST_23_PI429446426	CUST_23_PI429446426	FALSE									12Gtl2#1copy	unmapped				GGGTGTTTTCTTTCTCTCCCAGTAT
1567	87	147	CUST_122_PI429446417	CUST_122_PI429446417	FALSE									#3	unmapped				CCGAGCCAAGTTGTGGAAGTCCGTG
1568	87	145	CUST_49_PI429446419	CUST_49_PI429446419	FALSE									#10	unmapped				TGGCGCCGGGTGGACGGCTCGGTGG
1569	87	143	CUST_114_PI429446426	CUST_114_PI429446426	FALSE									12Gtl2#1copy	unmapped				TCCTTCGTCCCTTTCAACAGCATTC
1570	87	141	(-)3xSLv1	(-)3xSLv1	neg
1571	87	139	CUST_225_PI429446423	CUST_225_PI429446423	FALSE									Mettl3	unmapped				GGGGGTGACTCCAGTGCTGATCGAC
1572	87	137	CUST_248_PI429446423	CUST_248_PI429446423	FALSE									Mettl3	unmapped				GGGATATTCACATGGAGCTACCGTA
1573	87	135	CUST_253_PI429446423	CUST_253_PI429446423	FALSE									Mettl3	unmapped				TGGGACATTAACAGATGATGAGATG
1574	87	133	CUST_36_PI429446428	CUST_36_PI429446428	FALSE									13Gtl2#2copy	unmapped				TCCTTTGTCCCCGTGAAGCCCCCCC
1575	87	131	CUST_72_PI429446417	CUST_72_PI429446417	FALSE									#3	unmapped				ACTGCTGCGGCGTGCACACCAACTC
1576	87	129	CUST_84_PI429446433	CUST_84_PI429446433	FALSE									15Gtl2#6copy	unmapped				CATGCTCTTCTGAACACCCCCTGCC
1577	87	127	CUST_201_PI429446423	CUST_201_PI429446423	FALSE									Mettl3	unmapped				TGTTTCCACATGGACACCTGCAAAT
1578	87	125	CUST_38_PI429446428	CUST_38_PI429446428	FALSE									13Gtl2#2copy	unmapped				CCGTGAAGCCCCCCCTGGCCGCCCC
1579	87	123	CUST_13_PI429446417	CUST_13_PI429446417	FALSE									#3	unmapped				GGCAGAGAGCCTCCGGGACGCGGAG
1580	87	121	CUST_80_PI429446433	CUST_80_PI429446433	FALSE									15Gtl2#6copy	unmapped				GCACCTGGCAAGTGCAGCTGCATGC
1581	87	119	CUST_55_PI429446423	CUST_55_PI429446423	FALSE									Mettl3	unmapped				TGAGTTAGAGAAGAAGTTGCTACAC
1582	87	117	CUST_69_PI429446428	CUST_69_PI429446428	FALSE									13Gtl2#2copy	unmapped				GGGGAGGGAAGAGGAGGTGGCCTTT
1583	87	115	CUST_108_PI429446426	CUST_108_PI429446426	FALSE									12Gtl2#1copy	unmapped				GTTGCCACCCACCTGTCACCCCAAG
1584	87	113	CUST_50_PI429446426	CUST_50_PI429446426	FALSE									12Gtl2#1copy	unmapped				CCTGAGTCACCTCGCCGGCAAGCTG
1585	87	111	CUST_309_PI429446423	CUST_309_PI429446423	FALSE									Mettl3	unmapped				TGCGATGTGATTGTAGCTGAGGTTC
1586	87	109	CUST_152_PI429446423	CUST_152_PI429446423	FALSE									Mettl3	unmapped				AGAGCAAGAAGGTCAGTCAGGAGAT
1587	87	107	CUST_37_PI429446433	CUST_37_PI429446433	FALSE									15Gtl2#6copy	unmapped				TCTCTCCTCTTCCCTCTTTTCATCC
1588	87	105	CUST_235_PI429446423	CUST_235_PI429446423	FALSE									Mettl3	unmapped				TGATATCCGCTACCTGGACGTCAGT
1589	87	103	CUST_102_PI429446423	CUST_102_PI429446423	FALSE									Mettl3	unmapped				GCCATGATGGGGGCTGTGGCAGAAA
1590	87	101	CUST_32_PI429446417	CUST_32_PI429446417	FALSE									#3	unmapped				GACACCGCCTCCCGCGTCGGGGTCC
1591	87	99	CUST_31_PI429446419	CUST_31_PI429446419	FALSE									#10	unmapped				GCAGCCGGGCTCTCGCACCAGCTCC
1592	87	97	CUST_189_PI429446423	CUST_189_PI429446423	FALSE									Mettl3	unmapped				AGACGAATTATCAATAAGCACACTG
1593	87	95	CUST_55_PI429446423	CUST_55_PI429446423	FALSE									Mettl3	unmapped				TGAGTTAGAGAAGAAGTTGCTACAC
1594	87	93	CUST_79_PI429446433	CUST_79_PI429446433	FALSE									15Gtl2#6copy	unmapped				GAGAAGCACCTGGCAAGTGCAGCTG
1595	87	91	CUST_64_PI429446423	CUST_64_PI429446423	FALSE									Mettl3	unmapped				GACCTTGCCCACTGATGCTGTTTCC
1596	87	89	CUST_46_PI429446428	CUST_46_PI429446428	FALSE									13Gtl2#2copy	unmapped				TGGCTGGCTGAGGGGGGGGGCAGCC
1597	87	87	CUST_34_PI429446421	CUST_34_PI429446421	FALSE									anti_actB	unmapped				GATGACCTGGCCGTCAGGCAGCTCA
1598	87	85	NA	NA	ignore
1599	87	83	CUST_60_PI429446419	CUST_60_PI429446419	FALSE									#10	unmapped				GCGGCGGGATGGGAGCAGCAAGCAA
1600	87	81	CUST_127_PI429446423	CUST_127_PI429446423	FALSE									Mettl3	unmapped				TGGTCTGGCCTCTTCAGCATCAGAA
1601	87	79	CUST_329_PI429446423	CUST_329_PI429446423	FALSE									Mettl3	unmapped				TATTTGGACGACCACACAATGTGCA
1602	87	77	CUST_40_PI429446428	CUST_40_PI429446428	FALSE									13Gtl2#2copy	unmapped				CCCCCTGGCCGCCCCCTCCTCATTC
1603	87	75	CUST_332_PI429446423	CUST_332_PI429446423	FALSE									Mettl3	unmapped				ACAATGTGCAGCCCAACTGGATTAC
1604	87	73	CUST_7_PI429446421	CUST_7_PI429446421	FALSE									anti_actB	unmapped				GAGGTCTTTACGGATGTCAACGTCA
1605	87	71	CUST_29_PI429446421	CUST_29_PI429446421	FALSE									anti_actB	unmapped				ATCGGAACCGCTCGTTGCCAATAGT
1606	87	69	CUST_251_PI429446423	CUST_251_PI429446423	FALSE									Mettl3	unmapped				AGCTACCGTATGGGACATTAACAGA
1607	87	67	CUST_109_PI429446417	CUST_109_PI429446417	FALSE									#3	unmapped				CTGCCGCCACTGCCGACGCCCGGGG
1608	87	65	CUST_64_PI429446423	CUST_64_PI429446423	FALSE									Mettl3	unmapped				GACCTTGCCCACTGATGCTGTTTCC
1609	87	63	CUST_303_PI429446423	CUST_303_PI429446423	FALSE									Mettl3	unmapped				AATCCTCAAGGATTCAACCAGGGCC
1610	87	61	CUST_321_PI429446423	CUST_321_PI429446423	FALSE									Mettl3	unmapped				ATGATTGAGAGACTGTCCCCTGGCA
1611	87	59	A_51_P213099	A_51_P213099	FALSE		AK053689	80883	Ntng1	netrin G1	Mm.39262			gb|AK053689|gb|AK020842|tc|TC1627196|riken|E130203P04	chr3:109946407-109946348	mm|3qF3	Mus musculus 0 day neonate eyeball cDNA, RIKEN full-length enriched library, clone:E130203P04 product:hypothetical protein, full insert sequence. [AK053689]	GO:0005886(plasma membrane)|GO:0007275(multicellular organismal development)|GO:0007399(nervous system development)|GO:0007409(axonogenesis)|GO:0016020(membrane)|GO:0030154(cell differentiation)|GO:0031225(anchored to membrane)|GO:0046658(anchored to plasma membrane)	GCGAAGAAAACCGGGGCGAAATTGCTTCGAGAGGATCTTCTTGGCGCCAAGGCTAATTGT
1612	87	57	CUST_47_PI429446430	CUST_47_PI429446430	FALSE									14Gtl2#4copy	unmapped				AAGCTTGTGTTTCTGTGTATGTGGT
1613	87	55	CUST_30_PI429446423	CUST_30_PI429446423	FALSE									Mettl3	unmapped				TTAAGGAACCCAGAAGCGGCACTGT
1614	87	53	CUST_97_PI429446417	CUST_97_PI429446417	FALSE									#3	unmapped				TTGCCTTTGCAGCCGCCGGTGGCGA
1615	87	51	CUST_24_PI429446433	CUST_24_PI429446433	FALSE									15Gtl2#6copy	unmapped				GTGACCAGCATCTACTAAGATCACT
1616	87	49	CUST_2_PI429446419	CUST_2_PI429446419	FALSE									#10	unmapped				TGGCGCAGAACCCGCGGCCATTCAG
1617	87	47	CUST_306_PI429446423	CUST_306_PI429446423	FALSE									Mettl3	unmapped				AACCAGGGCCTGGACTGCGATGTGA
1618	87	45	A_51_P398235	A_51_P398235	FALSE	NM_172704	NM_172704	230935	Dnajc11	DnaJ (Hsp40) homolog, subfamily C, member 11	Mm.21353	ENSMUST00000062904		ref|NM_172704|ens|ENSMUST00000062904|gb|BC079852|gb|AK171781	chr4:151355874-151355933	mm|4qE2	Mus musculus DnaJ (Hsp40) homolog, subfamily C, member 11 (Dnajc11), mRNA [NM_172704]	GO:0005739(mitochondrion)|GO:0005743(mitochondrial inner membrane)|GO:0008150(biological_process)	TAAAAGCAGTTCGATTCTGTAATATTTATTTTTCTTTTTGAGGATGTTTCGTTGCCCCGC
1619	87	43	CUST_63_PI429446417	CUST_63_PI429446417	FALSE									#3	unmapped				GCCGGCCGTTCTCCTCCAGGCCGAA
1620	87	41	CUST_273_PI429446423	CUST_273_PI429446423	FALSE									Mettl3	unmapped				GGCAGAGAATGTCTGAACCTCTGGG
1621	87	39	CUST_156_PI429446423	CUST_156_PI429446423	FALSE									Mettl3	unmapped				GAGATCCTAGAGCTATTAAATACCA
1622	87	37	A_51_P117604	A_51_P117604	FALSE	NM_025887	NM_025887	271457	Rab5a	RAB5A, member RAS oncogene family	Mm.329123	ENSMUST00000017975		ref|NM_025887|ens|ENSMUST00000017975|gb|AK076093|gb|BC034370	chr17:53646662-53646721	mm|17qC	Mus musculus RAB5A, member RAS oncogene family (Rab5a), mRNA [NM_025887]	GO:0000166(nucleotide binding)|GO:0001726(ruffle)|GO:0003924(GTPase activity)|GO:0005515(protein binding)|GO:0005525(GTP binding)|GO:0005768(endosome)|GO:0005769(early endosome)|GO:0005886(plasma membrane)|GO:0006184(GTP catabolic process)|GO:0006810(transport)|GO:0006897(endocytosis)|GO:0007264(small GTPase mediated signal transduction)|GO:0007399(nervous system development)|GO:0015031(protein t…	TCCCCTATGAAAGGAAGGGGCTTTGCTGTTCTTACATGGCTAGAACCATAATAAACAATG
1623	87	35	CUST_141_PI429446423	CUST_141_PI429446423	FALSE									Mettl3	unmapped				GATGTTGATCTGGAGATAGAAAGCC
1624	87	33	CUST_168_PI429446423	CUST_168_PI429446423	FALSE									Mettl3	unmapped				CGCTCTCGAGGTCGGGCCCAGGTGC
1625	87	31	CUST_19_PI429446430	CUST_19_PI429446430	FALSE									14Gtl2#4copy	unmapped				AGTCCCTCTGTGGTGCCCTGGCCTT
1626	87	29	CUST_241_PI429446423	CUST_241_PI429446423	FALSE									Mettl3	unmapped				GGGCAAATTTGCAGTTGTGATGGCT
1627	87	27	CUST_236_PI429446423	CUST_236_PI429446423	FALSE									Mettl3	unmapped				TCCGCTACCTGGACGTCAGTATCTT
1628	87	25	CUST_35_PI429446417	CUST_35_PI429446417	FALSE									#3	unmapped				GTCGGGGTCCTCGGCCGTGCCCCCT
1629	87	23	CUST_55_PI429446430	CUST_55_PI429446430	FALSE									14Gtl2#4copy	unmapped				CCCTGGGACAGTGCCAAGAACCAAG
1630	87	21	CUST_84_PI429446417	CUST_84_PI429446417	FALSE									#3	unmapped				GCGCACGGCCGCCCGCCAGCCCCGC
1631	87	19	CUST_214_PI429446423	CUST_214_PI429446423	FALSE									Mettl3	unmapped				TCCTGGCAGCAAGGAGCATATGCCA
1632	87	17	A_51_P468505	A_51_P468505	FALSE	NM_001007581	NM_001007581	381406	2810408M09Rik	RIKEN cDNA 2810408M09 gene	Mm.330785	ENSMUST00000039007		ref|NM_001007581|ens|ENSMUST00000039007|gb|AK013049|gb|AK077144	chr2:165316251-165316192	mm|2qH3	Mus musculus RIKEN cDNA 2810408M09 gene (2810408M09Rik), mRNA [NM_001007581]	GO:0003674(molecular_function)|GO:0005575(cellular_component)|GO:0008150(biological_process)	GGTATTTGTTATATGTATGAAGACTGTGCTCGAGGCTAGTTCAGTGGATGTAAACTCCAC
1633	87	15	CUST_109_PI429446417	CUST_109_PI429446417	FALSE									#3	unmapped				CTGCCGCCACTGCCGACGCCCGGGG
1634	87	13	CUST_10_PI429446419	CUST_10_PI429446419	FALSE									#10	unmapped				GTACTGCTCCGCGGGCCGCGGCTGG
1635	87	11	NA	NA	ignore
1636	87	9	CUST_138_PI429446423	CUST_138_PI429446423	FALSE									Mettl3	unmapped				AAGCACGCTGCCTCCGATGTTGATC
1637	87	7	CUST_110_PI429446417	CUST_110_PI429446417	FALSE									#3	unmapped				GCCACTGCCGACGCCCGGGGCCGCT
1638	87	5	(+)E1A_r60_a107	(+)E1A_r60_a107	pos
1639	87	3	CUST_27_PI429446430	CUST_27_PI429446430	FALSE									14Gtl2#4copy	unmapped				ATGGTGGCTGGTGCTGCTGGTTGTG
1640	87	1	CUST_111_PI429446417	CUST_111_PI429446417	FALSE									#3	unmapped				TGCCGACGCCCGGGGCCGCTACGCA
1641	86	164	CUST_34_PI429446426	CUST_34_PI429446426	FALSE									12Gtl2#1copy	unmapped				CCCCAAAGCCCTAAACCTTCATTTT
1642	86	162	CUST_344_PI429446423	CUST_344_PI429446423	FALSE									Mettl3	unmapped				ACCCAGATGTGGTTGCCAGGTTTAA
1643	86	160	CUST_132_PI429446423	CUST_132_PI429446423	FALSE									Mettl3	unmapped				CCAGCTAAGGAGCCGGCTAAGAAGT
1644	86	158	CUST_61_PI429446433	CUST_61_PI429446433	FALSE									15Gtl2#6copy	unmapped				TCTTCTCTCTCCTCTCCTTTTTTCC
1645	86	156	CUST_36_PI429446423	CUST_36_PI429446423	FALSE									Mettl3	unmapped				ACCTTCCGTAGTGATAGTCCCGTGC
1646	86	154	CUST_275_PI429446423	CUST_275_PI429446423	FALSE									Mettl3	unmapped				GTCTGAACCTCTGGGGTTATGAACG
1647	86	152	CUST_52_PI429446433	CUST_52_PI429446433	FALSE									15Gtl2#6copy	unmapped				CCCTACACGTCTTTGCTTTTTCTTT
1648	86	150	CUST_13_PI429446421	CUST_13_PI429446421	FALSE									anti_actB	unmapped				CATGATGGAATTGAATGTAGTTTCA
1649	86	148	CUST_122_PI429446417	CUST_122_PI429446417	FALSE									#3	unmapped				CCGAGCCAAGTTGTGGAAGTCCGTG
1650	86	146	CUST_66_PI429446417	CUST_66_PI429446417	FALSE									#3	unmapped				CCAGGCCGAAGTAGCTGCCGGCGGC
1651	86	144	CUST_5_PI429446419	CUST_5_PI429446419	FALSE									#10	unmapped				GGCCATTCAGCAGCGCCCTCAGCGG
1652	86	142	CUST_246_PI429446423	CUST_246_PI429446423	FALSE									Mettl3	unmapped				GACCCACCTTGGGATATTCACATGG
1653	86	140	CUST_20_PI429446423	CUST_20_PI429446423	FALSE									Mettl3	unmapped				TTCGCGAGAGATTGCAGCGGCGACG
1654	86	138	CUST_74_PI429446430	CUST_74_PI429446430	FALSE									14Gtl2#4copy	unmapped				TAGGTCTGGGTGGCTGTTCTCCTCC
1655	86	136	CUST_131_PI429446423	CUST_131_PI429446423	FALSE									Mettl3	unmapped				CAGAACCAGCTAAGGAGCCGGCTAA
1656	86	134	CUST_45_PI429446428	CUST_45_PI429446428	FALSE									13Gtl2#2copy	unmapped				TGGGCTGGCTGGCTGAGGGGGGGGG
1657	86	132	CUST_108_PI429446423	CUST_108_PI429446423	FALSE									Mettl3	unmapped				GGTCTTGGAGAGGTAGCAGGGACCA
1658	86	130	CUST_52_PI429446423	CUST_52_PI429446423	FALSE									Mettl3	unmapped				ACTAGCTACAGACCCTGAGTTAGAG
1659	86	128	CUST_26_PI429446423	CUST_26_PI429446423	FALSE									Mettl3	unmapped				AGGACTCTGGGCACTTGGATTTAAG
1660	86	126	CUST_51_PI429446428	CUST_51_PI429446428	FALSE									13Gtl2#2copy	unmapped				TGAGGGCTGCGACGTGGCAGGTTTC
1661	86	124	CUST_64_PI429446423	CUST_64_PI429446423	FALSE									Mettl3	unmapped				GACCTTGCCCACTGATGCTGTTTCC
1662	86	122	CUST_60_PI429446423	CUST_60_PI429446423	FALSE									Mettl3	unmapped				CACCTCTCAGATCTGGCCTTGACCT
1663	86	120	CUST_42_PI429446430	CUST_42_PI429446430	FALSE									14Gtl2#4copy	unmapped				GGTGTCTGTTGGTAGATGCTTCTTC
1664	86	118	CUST_108_PI429446417	CUST_108_PI429446417	FALSE									#3	unmapped				GGCCGCTGCCGCCACTGCCGACGCC
1665	86	116	A_51_P102311	A_51_P102311	FALSE	NM_011661	NM_011661	22173	Tyr	tyrosinase	Mm.238127	ENSMUST00000004770		ref|NM_011661|ens|ENSMUST00000004770|gb|M24560|gb|D84001	chr7:94576324-94576265	mm|7qD3	Mus musculus tyrosinase (Tyr), mRNA [NM_011661]	GO:0004497(monooxygenase activity)|GO:0004503(monophenol monooxygenase activity)|GO:0005507(copper ion binding)|GO:0005515(protein binding)|GO:0005737(cytoplasm)|GO:0008152(metabolic process)|GO:0008283(cell proliferation)|GO:0016020(membrane)|GO:0016021(integral to membrane)|GO:0016491(oxidoreductase activity)|GO:0042438(melanin biosynthetic process)|GO:0042470(melanosome)|GO:0042803(protein hom…	TACTCTGCTACCTAGCATGTATATATAAATCTACCCAACAAATGTTCATTACAGCTGACA
1666	86	114	CUST_15_PI429446426	CUST_15_PI429446426	FALSE									12Gtl2#1copy	unmapped				TTGTCAGGGGCCTTCTTTTGGGGGG
1667	86	112	CUST_1_PI429446428	CUST_1_PI429446428	FALSE									13Gtl2#2copy	unmapped				GTCTCATAGGAAGGAAAAGATAAAA
1668	86	110	CUST_102_PI429446433	CUST_102_PI429446433	FALSE									15Gtl2#6copy	unmapped				GACTTTGGCATGTGTGATTGAGTCG
1669	86	108	CUST_96_PI429446426	CUST_96_PI429446426	FALSE									12Gtl2#1copy	unmapped				TAGGGTCTCAATCATTCTCGCTCCT
1670	86	106	CUST_228_PI429446423	CUST_228_PI429446423	FALSE									Mettl3	unmapped				GCTGATCGACTCTTTCCACCTCAGT
1671	86	104	CUST_87_PI429446417	CUST_87_PI429446417	FALSE									#3	unmapped				CCAGCCCCGCGCCGCCGCCCTCCGC
1672	86	102	CUST_20_PI429446419	CUST_20_PI429446419	FALSE									#10	unmapped				CCGTGTAGACGCCGCACGCGTCGCC
1673	86	100	CUST_110_PI429446426	CUST_110_PI429446426	FALSE									12Gtl2#1copy	unmapped				ACCTGTCACCCCAAGATAGATCCTT
1674	86	98	CUST_35_PI429446419	CUST_35_PI429446419	FALSE									#10	unmapped				GCTCCGTGCGCGCGGAGCAGAGTGA
1675	86	96	CUST_34_PI429446433	CUST_34_PI429446433	FALSE									15Gtl2#6copy	unmapped				CGTCACCCCTCCCCTTCTCTCCTCT
1676	86	94	CUST_50_PI429446430	CUST_50_PI429446430	FALSE									14Gtl2#4copy	unmapped				TGTATGTGGTGTGTGCATATCTGCC
1677	86	92	CUST_94_PI429446423	CUST_94_PI429446423	FALSE									Mettl3	unmapped				TCCTACTCTTGTAACTTACGCTGAC
1678	86	90	CUST_16_PI429446419	CUST_16_PI429446419	FALSE									#10	unmapped				GAGGCCGGTGCCACAGCGCTCCGTG
1679	86	88	CUST_123_PI429446423	CUST_123_PI429446423	FALSE									Mettl3	unmapped				TTTGCCAGCTCTTTAGCATCTGGTC
1680	86	86	CUST_302_PI429446423	CUST_302_PI429446423	FALSE									Mettl3	unmapped				AGGGAAATCCTCAAGGATTCAACCA
1681	86	84	CUST_82_PI429446417	CUST_82_PI429446417	FALSE									#3	unmapped				TCGGAGAAGCGCGCACGGCCGCCCG
1682	86	82	NA	NA	ignore
1683	86	80	CUST_15_PI429446433	CUST_15_PI429446433	FALSE									15Gtl2#6copy	unmapped				TCACTACAGCTGCCACATGTCTACC
1684	86	78	CUST_59_PI429446426	CUST_59_PI429446426	FALSE									12Gtl2#1copy	unmapped				CAGCGGTGGCTTTTCTCAGTGCCTC
1685	86	76	CUST_57_PI429446433	CUST_57_PI429446433	FALSE									15Gtl2#6copy	unmapped				TGATTCTTCATCTTCCCCTTTCTTC
1686	86	74	CUST_5_PI429446421	CUST_5_PI429446421	FALSE									anti_actB	unmapped				TGTTGGCATAGAGGTCTTTACGGAT
1687	86	72	CUST_14_PI429446421	CUST_14_PI429446421	FALSE									anti_actB	unmapped				TGGAATTGAATGTAGTTTCATGGAT
1688	86	70	CUST_43_PI429446421	CUST_43_PI429446421	FALSE									anti_actB	unmapped				AGAGGATGCGGCAGTGGCCATCTCC
1689	86	68	CUST_336_PI429446423	CUST_336_PI429446423	FALSE									Mettl3	unmapped				ATTACTCTTGGAAACCAACTGGATG
1690	86	66	CUST_81_PI429446428	CUST_81_PI429446428	FALSE									13Gtl2#2copy	unmapped				TTGCGGGACCATGGGTTCATTTACC
1691	86	64	(+)E1A_r60_1	(+)E1A_r60_1	pos
1692	86	62	CUST_227_PI429446423	CUST_227_PI429446423	FALSE									Mettl3	unmapped				CCAGTGCTGATCGACTCTTTCCACC
1693	86	60	CUST_54_PI429446433	CUST_54_PI429446433	FALSE									15Gtl2#6copy	unmapped				CTTTGCTTTTTCTTTTGATTCTTCA
1694	86	58	CUST_1_PI429446417	CUST_1_PI429446417	FALSE									#3	unmapped				AGCTGCGACACCGAGGTGAAGGCGC
1695	86	56	CUST_7_PI429446433	CUST_7_PI429446433	FALSE									15Gtl2#6copy	unmapped				ACGAACATTACCCCAGCAAAGAGGA
1696	86	54	CUST_66_PI429446419	CUST_66_PI429446419	FALSE									#10	unmapped				TCCTCAGCGCCCAGTCGCCGCTCTA
1697	86	52	CUST_30_PI429446417	CUST_30_PI429446417	FALSE									#3	unmapped				CGCCGCCGGCGACACCGCCTCCCGC
1698	86	50	CUST_12_PI429446428	CUST_12_PI429446428	FALSE									13Gtl2#2copy	unmapped				GGGTGATCTGAGTGCTGGAAATTTG
1699	86	48	CUST_61_PI429446433	CUST_61_PI429446433	FALSE									15Gtl2#6copy	unmapped				TCTTCTCTCTCCTCTCCTTTTTTCC
1700	86	46	CUST_164_PI429446423	CUST_164_PI429446423	FALSE									Mettl3	unmapped				AGTCCATTGTTGAAAAGTTTCGCTC
1701	86	44	CUST_32_PI429446433	CUST_32_PI429446433	FALSE									15Gtl2#6copy	unmapped				CCACCGCCACCGTCACCCCTCCCCT
1702	86	42	CUST_31_PI429446433	CUST_31_PI429446433	FALSE									15Gtl2#6copy	unmapped				CACTGCCACCGCCACCGTCACCCCT
1703	86	40	CUST_297_PI429446423	CUST_297_PI429446423	FALSE									Mettl3	unmapped				AAGGAACACTGCTTGGTTGGTGTTA
1704	86	38	CUST_120_PI429446423	CUST_120_PI429446423	FALSE									Mettl3	unmapped				ACTACAGTGACCACCTTTGCCAGCT
1705	86	36	NA	NA	ignore
1706	86	34	CUST_188_PI429446423	CUST_188_PI429446423	FALSE									Mettl3	unmapped				ACTTCAGACGAATTATCAATAAGCA
1707	86	32	CUST_169_PI429446423	CUST_169_PI429446423	FALSE									Mettl3	unmapped				TCGAGGTCGGGCCCAGGTGCAAGAA
1708	86	30	CUST_59_PI429446419	CUST_59_PI429446419	FALSE									#10	unmapped				ATGAGGCGGCGGGATGGGAGCAGCA
1709	86	28	CUST_41_PI429446433	CUST_41_PI429446433	FALSE									15Gtl2#6copy	unmapped				CATCCTTTTTCTTCCTCTCCTTCCT
1710	86	26	CUST_10_PI429446417	CUST_10_PI429446417	FALSE									#3	unmapped				CCCTCCAGCCGTCCGGGCAGAGAGC
1711	86	24	CUST_173_PI429446423	CUST_173_PI429446423	FALSE									Mettl3	unmapped				AAGAATTTTGTGATTATGGGACCAA
1712	86	22	ETG04_27747	ETG04_27747	pos
1713	86	20	CUST_30_PI429446423	CUST_30_PI429446423	FALSE									Mettl3	unmapped				TTAAGGAACCCAGAAGCGGCACTGT
1714	86	18	CUST_39_PI429446419	CUST_39_PI429446419	FALSE									#10	unmapped				AGTGAGGGCAGTGAGCGCAGCCGCC
1715	86	16	CUST_99_PI429446426	CUST_99_PI429446426	FALSE									12Gtl2#1copy	unmapped				TCTCGCTCCTTTTCTGTCACCAGAC
1716	86	14	CUST_73_PI429446430	CUST_73_PI429446430	FALSE									14Gtl2#4copy	unmapped				GCTGGTAGGTCTGGGTGGCTGTTCT
1717	86	12	CUST_50_PI429446423	CUST_50_PI429446423	FALSE									Mettl3	unmapped				TGGCCCCTGAACTAGCTACAGACCC
1718	86	10	CUST_18_PI429446421	CUST_18_PI429446421	FALSE									anti_actB	unmapped				TGGATGCCACAGGATTCCATACCCA
1719	86	8	CUST_23_PI429446426	CUST_23_PI429446426	FALSE									12Gtl2#1copy	unmapped				GGGTGTTTTCTTTCTCTCCCAGTAT
1720	86	6	CUST_130_PI429446417	CUST_130_PI429446417	FALSE									#3	unmapped				CCGGCACCCGCGGAGCCCGGCGGGT
1721	86	4	CUST_32_PI429446419	CUST_32_PI429446419	FALSE									#10	unmapped				CGGGCTCTCGCACCAGCTCCGTGCG
1722	86	2	CUST_91_PI429446426	CUST_91_PI429446426	FALSE									12Gtl2#1copy	unmapped				TCCACAGGGCCTCTGACTTTCCTTT
1723	86	163	CUST_12_PI429446423	CUST_12_PI429446423	FALSE									Mettl3	unmapped				TGGAGCTCTATCCAGGCCCATAAGA
1724	86	161	CUST_253_PI429446423	CUST_253_PI429446423	FALSE									Mettl3	unmapped				TGGGACATTAACAGATGATGAGATG
1725	86	159	CUST_29_PI429446423	CUST_29_PI429446423	FALSE									Mettl3	unmapped				TGGATTTAAGGAACCCAGAAGCGGC
1726	86	157	CUST_160_PI429446423	CUST_160_PI429446423	FALSE									Mettl3	unmapped				TACCACAACAGCCAAGGAACAGTCC
1727	86	155	CUST_85_PI429446430	CUST_85_PI429446430	FALSE									14Gtl2#4copy	unmapped				TGAGAAAAATTAGCTTTCTCTACAC
1728	86	153	CUST_65_PI429446419	CUST_65_PI429446419	FALSE									#10	unmapped				GCAGGTCCTCAGCGCCCAGTCGCCG
1729	86	151	CUST_124_PI429446426	CUST_124_PI429446426	FALSE									12Gtl2#1copy	unmapped				GGACATGTTGCCCCCTTTGCCACTT
1730	86	149	CUST_83_PI429446428	CUST_83_PI429446428	FALSE									13Gtl2#2copy	unmapped				ATGGGTTCATTTACCTATGGGGAAA
1731	86	147	CUST_83_PI429446423	CUST_83_PI429446423	FALSE									Mettl3	unmapped				TTGCCGCCCAGGAGTTGATTGAGGT
1732	86	145	CUST_57_PI429446417	CUST_57_PI429446417	FALSE									#3	unmapped				CGCCAGTCTCCGGGCTGGGCGGCGC
1733	86	143	CUST_93_PI429446417	CUST_93_PI429446417	FALSE									#3	unmapped				CCTCCTCCGGGAACCGCCTCTTGCC
1734	86	141	CUST_155_PI429446423	CUST_155_PI429446423	FALSE									Mettl3	unmapped				GTCAGGAGATCCTAGAGCTATTAAA
1735	86	139	CUST_97_PI429446433	CUST_97_PI429446433	FALSE									15Gtl2#6copy	unmapped				AAGAGCCAGTACCAGCCATGATGGG
1736	86	137	(+)eQC-41	(+)eQC-41	pos
1737	86	135	CUST_190_PI429446423	CUST_190_PI429446423	FALSE									Mettl3	unmapped				AATTATCAATAAGCACACTGATGAA
1738	86	133	CUST_1_PI429446433	CUST_1_PI429446433	FALSE									15Gtl2#6copy	unmapped				GAGCTGAGTTTTGGTAGAGCAGATG
1739	86	131	CUST_89_PI429446433	CUST_89_PI429446433	FALSE									15Gtl2#6copy	unmapped				AAGAGCACCATCTTCAAGACTTGGG
1740	86	129	CUST_123_PI429446426	CUST_123_PI429446426	FALSE									12Gtl2#1copy	unmapped				TTGATGGACATGTTGCCCCCTTTGC
1741	86	127	CUST_86_PI429446428	CUST_86_PI429446428	FALSE									13Gtl2#2copy	unmapped				TATGGGGAAATGTTAGTAGATACCT
1742	86	125	CUST_36_PI429446426	CUST_36_PI429446426	FALSE									12Gtl2#1copy	unmapped				CTAAACCTTCATTTTCACCCTCCGA
1743	86	123	CUST_82_PI429446428	CUST_82_PI429446428	FALSE									13Gtl2#2copy	unmapped				GGACCATGGGTTCATTTACCTATGG
1744	86	121	CUST_35_PI429446430	CUST_35_PI429446430	FALSE									14Gtl2#4copy	unmapped				GCTGGGCCACTATGCTTTGGGGCAT
1745	86	119	CUST_351_PI429446423	CUST_351_PI429446423	FALSE									Mettl3	unmapped				CCGGACGGCATCATCTCTAAACCTA
1746	86	117	CUST_237_PI429446423	CUST_237_PI429446423	FALSE									Mettl3	unmapped				TACCTGGACGTCAGTATCTTGGGCA
1747	86	115	CUST_15_PI429446426	CUST_15_PI429446426	FALSE									12Gtl2#1copy	unmapped				TTGTCAGGGGCCTTCTTTTGGGGGG
1748	86	113	CUST_124_PI429446417	CUST_124_PI429446417	FALSE									#3	unmapped				TTGTGGAAGTCCGTGGACGGCTTGG
1749	86	111	CUST_34_PI429446417	CUST_34_PI429446417	FALSE									#3	unmapped				CCCGCGTCGGGGTCCTCGGCCGTGC
1750	86	109	CUST_68_PI429446423	CUST_68_PI429446423	FALSE									Mettl3	unmapped				TTTCCATCCGTCTTGCCATCTCTAC
1751	86	107	CUST_4_PI429446430	CUST_4_PI429446430	FALSE									14Gtl2#4copy	unmapped				TCGATGTGGTATTCGAGGCTGGCTG
1752	86	105	CUST_12_PI429446423	CUST_12_PI429446423	FALSE									Mettl3	unmapped				TGGAGCTCTATCCAGGCCCATAAGA
1753	86	103	CUST_39_PI429446421	CUST_39_PI429446421	FALSE									anti_actB	unmapped				TAGCTCTTCTCCAGGGAGGAAGAGG
1754	86	101	CUST_42_PI429446430	CUST_42_PI429446430	FALSE									14Gtl2#4copy	unmapped				GGTGTCTGTTGGTAGATGCTTCTTC
1755	86	99	CUST_84_PI429446428	CUST_84_PI429446428	FALSE									13Gtl2#2copy	unmapped				TTCATTTACCTATGGGGAAATGTTA
1756	86	97	CUST_103_PI429446423	CUST_103_PI429446423	FALSE									Mettl3	unmapped				GATGGGGGCTGTGGCAGAAAAGAAA
1757	86	95	CUST_55_PI429446426	CUST_55_PI429446426	FALSE									12Gtl2#1copy	unmapped				CTGATCGGTAACCCTGGGCTCAGCG
1758	86	93	CUST_22_PI429446417	CUST_22_PI429446417	FALSE									#3	unmapped				CCAGGCGACCCCGCCGCGGGGGTGG
1759	86	91	CUST_77_PI429446428	CUST_77_PI429446428	FALSE									13Gtl2#2copy	unmapped				GGGGTCGGGAGCGAGATGGGTTGCG
1760	86	89	CUST_41_PI429446426	CUST_41_PI429446426	FALSE									12Gtl2#1copy	unmapped				AGTGCATCGGTTCCTACCTTAACAA
1761	86	87	CUST_82_PI429446433	CUST_82_PI429446433	FALSE									15Gtl2#6copy	unmapped				AGTGCAGCTGCATGCTCTTCTGAAC
1762	86	85	CUST_22_PI429446423	CUST_22_PI429446423	FALSE									Mettl3	unmapped				ATTGCAGCGGCGACGGAAGCAGGAC
1763	86	83	CUST_113_PI429446417	CUST_113_PI429446417	FALSE									#3	unmapped				CGGGGCCGCTACGCAACTGCTGCTT
1764	86	81	CUST_85_PI429446423	CUST_85_PI429446423	FALSE									Mettl3	unmapped				GGAGTTGATTGAGGTAAAGCGAGGT
1765	86	79	CUST_141_PI429446423	CUST_141_PI429446423	FALSE									Mettl3	unmapped				GATGTTGATCTGGAGATAGAAAGCC
1766	86	77	CUST_61_PI429446426	CUST_61_PI429446426	FALSE									12Gtl2#1copy	unmapped				TTTTCTCAGTGCCTCTCAGCCCCAG
1767	86	75	CUST_72_PI429446428	CUST_72_PI429446428	FALSE									13Gtl2#2copy	unmapped				GGTGGCCTTTGTTCTCCTGCAGGAG
1768	86	73	CUST_168_PI429446423	CUST_168_PI429446423	FALSE									Mettl3	unmapped				CGCTCTCGAGGTCGGGCCCAGGTGC
1769	86	71	CUST_79_PI429446430	CUST_79_PI429446430	FALSE									14Gtl2#4copy	unmapped				CCGCTCCCCCTTTCTTCCCCTGCCA
1770	86	69	CUST_8_PI429446417	CUST_8_PI429446417	FALSE									#3	unmapped				GGGGCTCCCGCCCTCCAGCCGTCCG
1771	86	67	CUST_43_PI429446426	CUST_43_PI429446426	FALSE									12Gtl2#1copy	unmapped				TTCCTACCTTAACAACGCCCCCACC
1772	86	65	CUST_353_PI429446423	CUST_353_PI429446423	FALSE									Mettl3	unmapped				TCATCTCTAAACCTAAGAATTTATA
1773	86	63	CUST_336_PI429446423	CUST_336_PI429446423	FALSE									Mettl3	unmapped				ATTACTCTTGGAAACCAACTGGATG
1774	86	61	CUST_9_PI429446419	CUST_9_PI429446419	FALSE									#10	unmapped				AGCGGGTACTGCTCCGCGGGCCGCG
1775	86	59	CUST_171_PI429446423	CUST_171_PI429446423	FALSE									Mettl3	unmapped				GCCCAGGTGCAAGAATTTTGTGATT
1776	86	57	CUST_67_PI429446419	CUST_67_PI429446419	FALSE									#10	unmapped				AGCGCCCAGTCGCCGCTCTAAGCTC
1777	86	55	(+)E1A_r60_3	(+)E1A_r60_3	pos
1778	86	53	CUST_283_PI429446423	CUST_283_PI429446423	FALSE									Mettl3	unmapped				CTGGGTGAAGACTAATCAGCTGCAG
1779	86	51	CUST_26_PI429446417	CUST_26_PI429446417	FALSE									#3	unmapped				GGTGGACGAGCCGTTGCTGCCGCCG
1780	86	49	CUST_54_PI429446430	CUST_54_PI429446430	FALSE									14Gtl2#4copy	unmapped				CTGCCCCCTGGGACAGTGCCAAGAA
1781	86	47	CUST_2_PI429446423	CUST_2_PI429446423	FALSE									Mettl3	unmapped				CCATGGACTACAAAGACGATGACGA
1782	86	45	CUST_80_PI429446423	CUST_80_PI429446423	FALSE									Mettl3	unmapped				GCCTTCTCCAGAAATTTGCCGCCCA
1783	86	43	CUST_46_PI429446423	CUST_46_PI429446423	FALSE									Mettl3	unmapped				TAAGCCCAGCACAACATCTGTGGCC
1784	86	41	CUST_18_PI429446428	CUST_18_PI429446428	FALSE									13Gtl2#2copy	unmapped				AGGGTTCTTTTTGGCATTGCGCATG
1785	86	39	CUST_28_PI429446433	CUST_28_PI429446433	FALSE									15Gtl2#6copy	unmapped				TCACTGCTGCATTGCCACTGCCACC
1786	86	37	CUST_57_PI429446426	CUST_57_PI429446426	FALSE									12Gtl2#1copy	unmapped				ACCCTGGGCTCAGCGGTGGCTTTTC
1787	86	35	CUST_85_PI429446423	CUST_85_PI429446423	FALSE									Mettl3	unmapped				GGAGTTGATTGAGGTAAAGCGAGGT
1788	86	33	CUST_39_PI429446417	CUST_39_PI429446417	FALSE									#3	unmapped				CCCCTGCGCCGTCTGTCGCCGCCGC
1789	86	31	CUST_105_PI429446417	CUST_105_PI429446417	FALSE									#3	unmapped				GCTCCGCCTCCTGGTGGCCGCTGCC
1790	86	29	CUST_161_PI429446423	CUST_161_PI429446423	FALSE									Mettl3	unmapped				CAACAGCCAAGGAACAGTCCATTGT
1791	86	27	CUST_134_PI429446423	CUST_134_PI429446423	FALSE									Mettl3	unmapped				AGCCGGCTAAGAAGTCAAGGAAGCA
1792	86	25	CUST_46_PI429446430	CUST_46_PI429446430	FALSE									14Gtl2#4copy	unmapped				TCTTCAAGCTTGTGTTTCTGTGTAT
1793	86	23	CUST_43_PI429446417	CUST_43_PI429446417	FALSE									#3	unmapped				GCCGCCTCCTCCTGCAAGCCCACCG
1794	86	21	CUST_27_PI429446423	CUST_27_PI429446423	FALSE									Mettl3	unmapped				TCTGGGCACTTGGATTTAAGGAACC
1795	86	19	CUST_5_PI429446423	CUST_5_PI429446423	FALSE									Mettl3	unmapped				ACGATGACGACAAGGGATCTGAATT
1796	86	17	CUST_157_PI429446423	CUST_157_PI429446423	FALSE									Mettl3	unmapped				CCTAGAGCTATTAAATACCACAACA
1797	86	15	CUST_68_PI429446417	CUST_68_PI429446417	FALSE									#3	unmapped				GTAGCTGCCGGCGGCGCGGTACTGC
1798	86	13	CUST_45_PI429446421	CUST_45_PI429446421	FALSE									anti_actB	unmapped				GCAGTGGCCATCTCCTGCTCGAAGT
1799	86	11	CUST_66_PI429446430	CUST_66_PI429446430	FALSE									14Gtl2#4copy	unmapped				TCCTTGAATTTTTTCTTACTGCTCT
1800	86	9	NA	NA	ignore
1801	86	7	CUST_339_PI429446423	CUST_339_PI429446423	FALSE									Mettl3	unmapped				CAACTGGATGGGATACACCTACTAG
1802	86	5	CUST_33_PI429446428	CUST_33_PI429446428	FALSE									13Gtl2#2copy	unmapped				TCACCTTTTGCCGTTTCCTTTGTCC
1803	86	3	CUST_48_PI429446417	CUST_48_PI429446417	FALSE									#3	unmapped				CGCGGCCCGCCTTCTTCACCTCCAC
1804	86	1	CUST_86_PI429446423	CUST_86_PI429446423	FALSE									Mettl3	unmapped				TGATTGAGGTAAAGCGAGGTCTCCT
1805	85	164	CUST_11_PI429446430	CUST_11_PI429446430	FALSE									14Gtl2#4copy	unmapped				GCTAAATCTGGTGTGGTTCATTCAT
1806	85	162	A_51_P390480	A_51_P390480	FALSE	NM_178020	NM_178020	109685	Hyal3	hyaluronoglucosaminidase 3	Mm.447916	ENSMUST00000040059		ref|NM_178020|ens|ENSMUST00000040059|gb|BC018457|gb|AY048681	chr9:107489245-107489304	mm|9qF1	Mus musculus hyaluronoglucosaminidase 3 (Hyal3), mRNA [NM_178020]	GO:0001618(viral receptor activity)|GO:0003824(catalytic activity)|GO:0004415(hyalurononglucosaminidase activity)|GO:0005576(extracellular region)|GO:0005764(lysosome)|GO:0005975(carbohydrate metabolic process)|GO:0006954(inflammatory response)|GO:0008152(metabolic process)|GO:0009615(response to virus)|GO:0016787(hydrolase activity)|GO:0016798(hydrolase activity, acting on glycosyl bonds)|GO:003…	GTTTAGCTTATGGGACTTTCCCAAGTACATATCCCACTTCCACCAATACAACTTCCATAG
1807	85	160	CUST_48_PI429446433	CUST_48_PI429446433	FALSE									15Gtl2#6copy	unmapped				TTCTTCTTCCTCTGCCTCTTCCCTA
1808	85	158	CUST_45_PI429446430	CUST_45_PI429446430	FALSE									14Gtl2#4copy	unmapped				ATGCTTCTTCAAGCTTGTGTTTCTG
1809	85	156	CUST_190_PI429446423	CUST_190_PI429446423	FALSE									Mettl3	unmapped				AATTATCAATAAGCACACTGATGAA
1810	85	154	CUST_107_PI429446417	CUST_107_PI429446417	FALSE									#3	unmapped				CTGGTGGCCGCTGCCGCCACTGCCG
1811	85	152	CUST_345_PI429446423	CUST_345_PI429446423	FALSE									Mettl3	unmapped				GATGTGGTTGCCAGGTTTAAGCAAA
1812	85	150	CUST_31_PI429446433	CUST_31_PI429446433	FALSE									15Gtl2#6copy	unmapped				CACTGCCACCGCCACCGTCACCCCT
1813	85	148	CUST_239_PI429446423	CUST_239_PI429446423	FALSE									Mettl3	unmapped				TCAGTATCTTGGGCAAATTTGCAGT
1814	85	146	NA	NA	ignore
1815	85	144	CUST_50_PI429446430	CUST_50_PI429446430	FALSE									14Gtl2#4copy	unmapped				TGTATGTGGTGTGTGCATATCTGCC
1816	85	142	CUST_59_PI429446417	CUST_59_PI429446417	FALSE									#3	unmapped				CGGGCTGGGCGGCGCGAAGAGCCGG
1817	85	140	CUST_156_PI429446423	CUST_156_PI429446423	FALSE									Mettl3	unmapped				GAGATCCTAGAGCTATTAAATACCA
1818	85	138	CUST_91_PI429446417	CUST_91_PI429446417	FALSE									#3	unmapped				TCCGCCGCCGCCTCCTCCGGGAACC
1819	85	136	CUST_8_PI429446419	CUST_8_PI429446419	FALSE									#10	unmapped				CCCTCAGCGGGTACTGCTCCGCGGG
1820	85	134	CUST_6_PI429446423	CUST_6_PI429446423	FALSE									Mettl3	unmapped				GACGACAAGGGATCTGAATTCTCGG
1821	85	132	CUST_33_PI429446428	CUST_33_PI429446428	FALSE									13Gtl2#2copy	unmapped				TCACCTTTTGCCGTTTCCTTTGTCC
1822	85	130	CUST_193_PI429446423	CUST_193_PI429446423	FALSE									Mettl3	unmapped				CACTGATGAATCTTTAGGTGACTGC
1823	85	128	CUST_62_PI429446430	CUST_62_PI429446430	FALSE									14Gtl2#4copy	unmapped				GGGGCTTCCAAATTATGACATCCTT
1824	85	126	CUST_26_PI429446430	CUST_26_PI429446430	FALSE									14Gtl2#4copy	unmapped				CCATCATGGTGGCTGGTGCTGCTGG
1825	85	124	CUST_40_PI429446426	CUST_40_PI429446426	FALSE									12Gtl2#1copy	unmapped				TCCGAAGTGCATCGGTTCCTACCTT
1826	85	122	CUST_87_PI429446433	CUST_87_PI429446433	FALSE									15Gtl2#6copy	unmapped				ACCCCCTGCCAAGAGCACCATCTTC
1827	85	120	CUST_3_PI429446428	CUST_3_PI429446428	FALSE									13Gtl2#2copy	unmapped				AAGGAAAAGATAAAATGCAGAAAAG
1828	85	118	CUST_43_PI429446430	CUST_43_PI429446430	FALSE									14Gtl2#4copy	unmapped				CTGTTGGTAGATGCTTCTTCAAGCT
1829	85	116	CUST_45_PI429446433	CUST_45_PI429446433	FALSE									15Gtl2#6copy	unmapped				TTCCTCTTCTGACTTTTCTTCTTCC
1830	85	114	CUST_44_PI429446421	CUST_44_PI429446421	FALSE									anti_actB	unmapped				ATGCGGCAGTGGCCATCTCCTGCTC
1831	85	112	CUST_12_PI429446417	CUST_12_PI429446417	FALSE									#3	unmapped				GTCCGGGCAGAGAGCCTCCGGGACG
1832	85	110	CUST_280_PI429446423	CUST_280_PI429446423	FALSE									Mettl3	unmapped				GGTGGATGAAATCATCTGGGTGAAG
1833	85	108	CUST_94_PI429446433	CUST_94_PI429446433	FALSE									15Gtl2#6copy	unmapped				CATGACCCAGCCTGGAAGAGCCAGT
1834	85	106	CUST_11_PI429446421	CUST_11_PI429446421	FALSE									anti_actB	unmapped				CGTCACACTTCATGATGGAATTGAA
1835	85	104	CUST_97_PI429446426	CUST_97_PI429446426	FALSE									12Gtl2#1copy	unmapped				TCTCAATCATTCTCGCTCCTTTTCT
1836	85	102	CUST_3_PI429446421	CUST_3_PI429446421	FALSE									anti_actB	unmapped				GACAGCACTGTGTTGGCATAGAGGT
1837	85	100	CUST_68_PI429446433	CUST_68_PI429446433	FALSE									15Gtl2#6copy	unmapped				TTCTCTTTCTCCCCCCTTCTGTCTT
1838	85	98	CUST_8_PI429446430	CUST_8_PI429446430	FALSE									14Gtl2#4copy	unmapped				GGCTGTGTGGTCCTGGCTAAATCTG
1839	85	96	CUST_258_PI429446423	CUST_258_PI429446423	FALSE									Mettl3	unmapped				CGCAGGCTCAATATACCAGTGCTAC
1840	85	94	CUST_67_PI429446426	CUST_67_PI429446426	FALSE									12Gtl2#1copy	unmapped				GAGTCACAGTGGCATCCTAGGCTTG
1841	85	92	CUST_10_PI429446430	CUST_10_PI429446430	FALSE									14Gtl2#4copy	unmapped				TCCTGGCTAAATCTGGTGTGGTTCA
1842	85	90	CUST_50_PI429446433	CUST_50_PI429446433	FALSE									15Gtl2#6copy	unmapped				TCTGCCTCTTCCCTACACGTCTTTG
1843	85	88	CUST_260_PI429446423	CUST_260_PI429446423	FALSE									Mettl3	unmapped				ATATACCAGTGCTACAGGATGACGG
1844	85	86	CUST_351_PI429446423	CUST_351_PI429446423	FALSE									Mettl3	unmapped				CCGGACGGCATCATCTCTAAACCTA
1845	85	84	CUST_40_PI429446433	CUST_40_PI429446433	FALSE									15Gtl2#6copy	unmapped				CTTTTCATCCTTTTTCTTCCTCTCC
1846	85	82	CUST_87_PI429446417	CUST_87_PI429446417	FALSE									#3	unmapped				CCAGCCCCGCGCCGCCGCCCTCCGC
1847	85	80	CUST_7_PI429446430	CUST_7_PI429446430	FALSE									14Gtl2#4copy	unmapped				AGGCTGGCTGTGTGGTCCTGGCTAA
1848	85	78	NA	NA	ignore
1849	85	76	CUST_83_PI429446417	CUST_83_PI429446417	FALSE									#3	unmapped				GAAGCGCGCACGGCCGCCCGCCAGC
1850	85	74	CUST_177_PI429446423	CUST_177_PI429446423	FALSE									Mettl3	unmapped				ACCAAGGAAGAGTGCATGAAAGCCA
1851	85	72	CUST_36_PI429446428	CUST_36_PI429446428	FALSE									13Gtl2#2copy	unmapped				TCCTTTGTCCCCGTGAAGCCCCCCC
1852	85	70	CUST_115_PI429446423	CUST_115_PI429446423	FALSE									Mettl3	unmapped				GAAACGGCGTGCAGAACAGGATTTG
1853	85	68	CUST_6_PI429446421	CUST_6_PI429446421	FALSE									anti_actB	unmapped				GCATAGAGGTCTTTACGGATGTCAA
1854	85	66	CUST_114_PI429446423	CUST_114_PI429446423	FALSE									Mettl3	unmapped				GGGCAGAAACGGCGTGCAGAACAGG
1855	85	64	CUST_81_PI429446417	CUST_81_PI429446417	FALSE									#3	unmapped				GCCTCTCGGAGAAGCGCGCACGGCC
1856	85	62	CUST_67_PI429446423	CUST_67_PI429446423	FALSE									Mettl3	unmapped				TGCTGTTTCCATCCGTCTTGCCATC
1857	85	60	CUST_117_PI429446426	CUST_117_PI429446426	FALSE									12Gtl2#1copy	unmapped				AACAGCATTCTGACCTTTTCGAGAG
1858	85	58	CUST_46_PI429446428	CUST_46_PI429446428	FALSE									13Gtl2#2copy	unmapped				TGGCTGGCTGAGGGGGGGGGCAGCC
1859	85	56	CUST_83_PI429446430	CUST_83_PI429446430	FALSE									14Gtl2#4copy	unmapped				TGCCAGGAGATGAGAAAAATTAGCT
1860	85	54	NA	NA	ignore
1861	85	52	CUST_54_PI429446430	CUST_54_PI429446430	FALSE									14Gtl2#4copy	unmapped				CTGCCCCCTGGGACAGTGCCAAGAA
1862	85	50	CUST_22_PI429446430	CUST_22_PI429446430	FALSE									14Gtl2#4copy	unmapped				CCCTGGCCTTCCCTTCCTTTCCATC
1863	85	48	CUST_37_PI429446426	CUST_37_PI429446426	FALSE									12Gtl2#1copy	unmapped				CCTTCATTTTCACCCTCCGAAGTGC
1864	85	46	CUST_14_PI429446417	CUST_14_PI429446417	FALSE									#3	unmapped				AGAGCCTCCGGGACGCGGAGCCAGC
1865	85	44	CUST_187_PI429446423	CUST_187_PI429446423	FALSE									Mettl3	unmapped				GCTGCACTTCAGACGAATTATCAAT
1866	85	42	CUST_57_PI429446419	CUST_57_PI429446419	FALSE									#10	unmapped				AGCACGCGGGATGAGGCGGCGGGAT
1867	85	40	CUST_94_PI429446426	CUST_94_PI429446426	FALSE									12Gtl2#1copy	unmapped				ACTTTCCTTTTAGGGTCTCAATCAT
1868	85	38	CUST_18_PI429446428	CUST_18_PI429446428	FALSE									13Gtl2#2copy	unmapped				AGGGTTCTTTTTGGCATTGCGCATG
1869	85	36	CUST_25_PI429446428	CUST_25_PI429446428	FALSE									13Gtl2#2copy	unmapped				CTAGATTCTGACGTGTTGAAGGCTT
1870	85	34	CUST_96_PI429446417	CUST_96_PI429446417	FALSE									#3	unmapped				GCCTCTTGCCTTTGCAGCCGCCGGT
1871	85	32	CUST_99_PI429446433	CUST_99_PI429446433	FALSE									15Gtl2#6copy	unmapped				ACCAGCCATGATGGGGACTTTGGCA
1872	85	30	RC11	RC11	pos
1873	85	28	CUST_188_PI429446423	CUST_188_PI429446423	FALSE									Mettl3	unmapped				ACTTCAGACGAATTATCAATAAGCA
1874	85	26	CUST_56_PI429446419	CUST_56_PI429446419	FALSE									#10	unmapped				AGTGGAGCACGCGGGATGAGGCGGC
1875	85	24	CUST_218_PI429446423	CUST_218_PI429446423	FALSE									Mettl3	unmapped				TGCCAAGCCAGGAGCTTGCTCTTAC
1876	85	22	CUST_69_PI429446426	CUST_69_PI429446426	FALSE									12Gtl2#1copy	unmapped				GGCATCCTAGGCTTGCTGGCCATAG
1877	85	20	CUST_85_PI429446430	CUST_85_PI429446430	FALSE									14Gtl2#4copy	unmapped				TGAGAAAAATTAGCTTTCTCTACAC
1878	85	18	CUST_33_PI429446428	CUST_33_PI429446428	FALSE									13Gtl2#2copy	unmapped				TCACCTTTTGCCGTTTCCTTTGTCC
1879	85	16	CUST_8_PI429446419	CUST_8_PI429446419	FALSE									#10	unmapped				CCCTCAGCGGGTACTGCTCCGCGGG
1880	85	14	CUST_250_PI429446423	CUST_250_PI429446423	FALSE									Mettl3	unmapped				CATGGAGCTACCGTATGGGACATTA
1881	85	12	CUST_49_PI429446419	CUST_49_PI429446419	FALSE									#10	unmapped				TGGCGCCGGGTGGACGGCTCGGTGG
1882	85	10	CUST_168_PI429446423	CUST_168_PI429446423	FALSE									Mettl3	unmapped				CGCTCTCGAGGTCGGGCCCAGGTGC
1883	85	8	CUST_121_PI429446426	CUST_121_PI429446426	FALSE									12Gtl2#1copy	unmapped				GAGAGGACATTTGATGGACATGTTG
1884	85	6	CUST_46_PI429446433	CUST_46_PI429446433	FALSE									15Gtl2#6copy	unmapped				CTTCTGACTTTTCTTCTTCCTCTGC
1885	85	4	CUST_46_PI429446428	CUST_46_PI429446428	FALSE									13Gtl2#2copy	unmapped				TGGCTGGCTGAGGGGGGGGGCAGCC
1886	85	2	CUST_32_PI429446423	CUST_32_PI429446423	FALSE									Mettl3	unmapped				CAGAAGCGGCACTGTCCCCAACCTT
1887	85	163	CUST_53_PI429446417	CUST_53_PI429446417	FALSE									#3	unmapped				GAAGGCGCTACGCTTCGCCTCGCCA
1888	85	161	A_51_P452119	A_51_P452119	FALSE	NM_008498	NM_008498	16869	Lhx1	LIM homeobox protein 1	Mm.4965			ref|NM_008498|gb|S68107|gb|BC092374|gb|Z27410	chr11:84333150-84333091	mm|11qC	Mus musculus LIM homeobox protein 1 (Lhx1), mRNA [NM_008498]	GO:0001071(nucleic acid binding transcription factor activity)|GO:0001655(urogenital system development)|GO:0001657(ureteric bud development)|GO:0001702(gastrulation with mouth forming second)|GO:0001705(ectoderm formation)|GO:0001706(endoderm formation)|GO:0001764(neuron migration)|GO:0001822(kidney development)|GO:0003677(DNA binding)|GO:0003700(sequence-specific DNA binding transcription facto…	GCCCAGTCCACCTTTCTCATCTCTGTCGGTCAATGGTGGAGCCAGCTACGGGAACCATTT
1889	85	159	CUST_12_PI429446421	CUST_12_PI429446421	FALSE									anti_actB	unmapped				CACTTCATGATGGAATTGAATGTAG
1890	85	157	CUST_334_PI429446423	CUST_334_PI429446423	FALSE									Mettl3	unmapped				GCCCAACTGGATTACTCTTGGAAAC
1891	85	155	CUST_25_PI429446430	CUST_25_PI429446430	FALSE									14Gtl2#4copy	unmapped				CCTTTCCATCATGGTGGCTGGTGCT
1892	85	153	CUST_31_PI429446417	CUST_31_PI429446417	FALSE									#3	unmapped				CCGGCGACACCGCCTCCCGCGTCGG
1893	85	151	CUST_87_PI429446428	CUST_87_PI429446428	FALSE									13Gtl2#2copy	unmapped				GGAAATGTTAGTAGATACCTGGATT
1894	85	149	CUST_18_PI429446430	CUST_18_PI429446430	FALSE									14Gtl2#4copy	unmapped				GTCTAAGTCCCTCTGTGGTGCCCTG
1895	85	147	CUST_39_PI429446426	CUST_39_PI429446426	FALSE									12Gtl2#1copy	unmapped				CACCCTCCGAAGTGCATCGGTTCCT
1896	85	145	NA	NA	ignore
1897	85	143	CUST_129_PI429446423	CUST_129_PI429446423	FALSE									Mettl3	unmapped				TCTTCAGCATCAGAACCAGCTAAGG
1898	85	141	CUST_125_PI429446417	CUST_125_PI429446417	FALSE									#3	unmapped				GAAGTCCGTGGACGGCTTGGCGCTG
1899	85	139	CUST_249_PI429446423	CUST_249_PI429446423	FALSE									Mettl3	unmapped				ATTCACATGGAGCTACCGTATGGGA
1900	85	137	CUST_78_PI429446426	CUST_78_PI429446426	FALSE									12Gtl2#1copy	unmapped				TGCAGAGGCGTAAATAAGGCGGCGG
1901	85	135	CUST_37_PI429446426	CUST_37_PI429446426	FALSE									12Gtl2#1copy	unmapped				CCTTCATTTTCACCCTCCGAAGTGC
1902	85	133	CUST_78_PI429446430	CUST_78_PI429446430	FALSE									14Gtl2#4copy	unmapped				CCTCCCCGCTCCCCCTTTCTTCCCC
1903	85	131	CUST_167_PI429446423	CUST_167_PI429446423	FALSE									Mettl3	unmapped				AGTTTCGCTCTCGAGGTCGGGCCCA
1904	85	129	CUST_47_PI429446423	CUST_47_PI429446423	FALSE									Mettl3	unmapped				CCAGCACAACATCTGTGGCCCCTGA
1905	85	127	CUST_32_PI429446433	CUST_32_PI429446433	FALSE									15Gtl2#6copy	unmapped				CCACCGCCACCGTCACCCCTCCCCT
1906	85	125	CUST_78_PI429446417	CUST_78_PI429446417	FALSE									#3	unmapped				TGGAGGTCGCCAGCGGCCTCTCGGA
1907	85	123	CUST_5_PI429446430	CUST_5_PI429446430	FALSE									14Gtl2#4copy	unmapped				GTGGTATTCGAGGCTGGCTGTGTGG
1908	85	121	CUST_33_PI429446417	CUST_33_PI429446417	FALSE									#3	unmapped				CGCCTCCCGCGTCGGGGTCCTCGGC
1909	85	119	CUST_319_PI429446423	CUST_319_PI429446423	FALSE									Mettl3	unmapped				AATATATGGCATGATTGAGAGACTG
1910	85	117	CUST_29_PI429446421	CUST_29_PI429446421	FALSE									anti_actB	unmapped				ATCGGAACCGCTCGTTGCCAATAGT
1911	85	115	CUST_96_PI429446433	CUST_96_PI429446433	FALSE									15Gtl2#6copy	unmapped				CCTGGAAGAGCCAGTACCAGCCATG
1912	85	113	CUST_110_PI429446423	CUST_110_PI429446423	FALSE									Mettl3	unmapped				AGGTAGCAGGGACCATCGCAGGGCA
1913	85	111	CUST_49_PI429446423	CUST_49_PI429446423	FALSE									Mettl3	unmapped				ATCTGTGGCCCCTGAACTAGCTACA
1914	85	109	CUST_17_PI429446419	CUST_17_PI429446419	FALSE									#10	unmapped				CGGTGCCACAGCGCTCCGTGTAGAC
1915	85	107	CUST_22_PI429446417	CUST_22_PI429446417	FALSE									#3	unmapped				CCAGGCGACCCCGCCGCGGGGGTGG
1916	85	105	CUST_290_PI429446423	CUST_290_PI429446423	FALSE									Mettl3	unmapped				GGACGGGCCGGACGGGTCACTGGTT
1917	85	103	CUST_128_PI429446423	CUST_128_PI429446423	FALSE									Mettl3	unmapped				TGGCCTCTTCAGCATCAGAACCAGC
1918	85	101	CUST_63_PI429446433	CUST_63_PI429446433	FALSE									15Gtl2#6copy	unmapped				CCTCTCCTTTTTTCCTCCTCTATCC
1919	85	99	CUST_232_PI429446423	CUST_232_PI429446423	FALSE									Mettl3	unmapped				TCAGTGGATCTGTTGTGATATCCGC
1920	85	97	NA	NA	ignore
1921	85	95	CUST_76_PI429446417	CUST_76_PI429446417	FALSE									#3	unmapped				AACTCCTCCTTGGAGGTCGCCAGCG
1922	85	93	CUST_35_PI429446433	CUST_35_PI429446433	FALSE									15Gtl2#6copy	unmapped				CCCCTCCCCTTCTCTCCTCTTCCCT
1923	85	91	CUST_81_PI429446428	CUST_81_PI429446428	FALSE									13Gtl2#2copy	unmapped				TTGCGGGACCATGGGTTCATTTACC
1924	85	89	CUST_33_PI429446419	CUST_33_PI429446419	FALSE									#10	unmapped				TCTCGCACCAGCTCCGTGCGCGCGG
1925	85	87	CUST_67_PI429446430	CUST_67_PI429446430	FALSE									14Gtl2#4copy	unmapped				GAATTTTTTCTTACTGCTCTCTCAC
1926	85	85	CUST_162_PI429446423	CUST_162_PI429446423	FALSE									Mettl3	unmapped				GCCAAGGAACAGTCCATTGTTGAAA
1927	85	83	CUST_151_PI429446423	CUST_151_PI429446423	FALSE									Mettl3	unmapped				ACAGCAGAGCAAGAAGGTCAGTCAG
1928	85	81	CUST_97_PI429446423	CUST_97_PI429446423	FALSE									Mettl3	unmapped				TTACGCTGACCACTCCAAGCTGTCT
1929	85	79	CUST_82_PI429446417	CUST_82_PI429446417	FALSE									#3	unmapped				TCGGAGAAGCGCGCACGGCCGCCCG
1930	85	77	CUST_37_PI429446421	CUST_37_PI429446421	FALSE									anti_actB	unmapped				AGGCAGCTCATAGCTCTTCTCCAGG
1931	85	75	CUST_33_PI429446430	CUST_33_PI429446430	FALSE									14Gtl2#4copy	unmapped				GCCAAAGCTGGCTGGGCCACTATGC
1932	85	73	NA	NA	ignore
1933	85	71	CUST_47_PI429446417	CUST_47_PI429446417	FALSE									#3	unmapped				CACCGCGCGGCCCGCCTTCTTCACC
1934	85	69	CUST_88_PI429446433	CUST_88_PI429446433	FALSE									15Gtl2#6copy	unmapped				CTGCCAAGAGCACCATCTTCAAGAC
1935	85	67	CUST_96_PI429446423	CUST_96_PI429446423	FALSE									Mettl3	unmapped				GTAACTTACGCTGACCACTCCAAGC
1936	85	65	CUST_283_PI429446423	CUST_283_PI429446423	FALSE									Mettl3	unmapped				CTGGGTGAAGACTAATCAGCTGCAG
1937	85	63	CUST_116_PI429446423	CUST_116_PI429446423	FALSE									Mettl3	unmapped				GGCGTGCAGAACAGGATTTGACTAC
1938	85	61	CUST_239_PI429446423	CUST_239_PI429446423	FALSE									Mettl3	unmapped				TCAGTATCTTGGGCAAATTTGCAGT
1939	85	59	CUST_89_PI429446426	CUST_89_PI429446426	FALSE									12Gtl2#1copy	unmapped				CTTCATGTCCTCCACAGGGCCTCTG
1940	85	57	CUST_72_PI429446426	CUST_72_PI429446426	FALSE									12Gtl2#1copy	unmapped				CTGGCCATAGGGGGCTTACGCGAAA
1941	85	55	CUST_116_PI429446423	CUST_116_PI429446423	FALSE									Mettl3	unmapped				GGCGTGCAGAACAGGATTTGACTAC
1942	85	53	CUST_60_PI429446419	CUST_60_PI429446419	FALSE									#10	unmapped				GCGGCGGGATGGGAGCAGCAAGCAA
1943	85	51	CUST_131_PI429446417	CUST_131_PI429446417	FALSE									#3	unmapped				ACCCGCGGAGCCCGGCGGGTTGCTC
1944	85	49	CUST_5_PI429446426	CUST_5_PI429446426	FALSE									12Gtl2#1copy	unmapped				ATGTTTTTTGCTGCATAATGACGTC
1945	85	47	CUST_17_PI429446433	CUST_17_PI429446433	FALSE									15Gtl2#6copy	unmapped				TGCCACATGTCTACCAAGACCACAG
1946	85	45	A_51_P452119	A_51_P452119	FALSE	NM_008498	NM_008498	16869	Lhx1	LIM homeobox protein 1	Mm.4965			ref|NM_008498|gb|S68107|gb|BC092374|gb|Z27410	chr11:84333150-84333091	mm|11qC	Mus musculus LIM homeobox protein 1 (Lhx1), mRNA [NM_008498]	GO:0001071(nucleic acid binding transcription factor activity)|GO:0001655(urogenital system development)|GO:0001657(ureteric bud development)|GO:0001702(gastrulation with mouth forming second)|GO:0001705(ectoderm formation)|GO:0001706(endoderm formation)|GO:0001764(neuron migration)|GO:0001822(kidney development)|GO:0003677(DNA binding)|GO:0003700(sequence-specific DNA binding transcription facto…	GCCCAGTCCACCTTTCTCATCTCTGTCGGTCAATGGTGGAGCCAGCTACGGGAACCATTT
1947	85	43	CUST_330_PI429446423	CUST_330_PI429446423	FALSE									Mettl3	unmapped				GGACGACCACACAATGTGCAGCCCA
1948	85	41	CUST_81_PI429446428	CUST_81_PI429446428	FALSE									13Gtl2#2copy	unmapped				TTGCGGGACCATGGGTTCATTTACC
1949	85	39	CUST_16_PI429446417	CUST_16_PI429446417	FALSE									#3	unmapped				GGACGCGGAGCCAGCAACTTCTCGG
1950	85	37	CUST_252_PI429446423	CUST_252_PI429446423	FALSE									Mettl3	unmapped				CCGTATGGGACATTAACAGATGATG
1951	85	35	CUST_67_PI429446428	CUST_67_PI429446428	FALSE									13Gtl2#2copy	unmapped				GGGGCGGGGTGGGGAGGGAAGAGGA
1952	85	33	CUST_96_PI429446426	CUST_96_PI429446426	FALSE									12Gtl2#1copy	unmapped				TAGGGTCTCAATCATTCTCGCTCCT
1953	85	31	CUST_33_PI429446426	CUST_33_PI429446426	FALSE									12Gtl2#1copy	unmapped				GATGCCCCCAAAGCCCTAAACCTTC
1954	85	29	CUST_13_PI429446423	CUST_13_PI429446423	FALSE									Mettl3	unmapped				CTCTATCCAGGCCCATAAGAAACAG
1955	85	27	CUST_93_PI429446423	CUST_93_PI429446423	FALSE									Mettl3	unmapped				GCACATCCTACTCTTGTAACTTACG
1956	85	25	CUST_44_PI429446419	CUST_44_PI429446419	FALSE									#10	unmapped				CAGAGCGCGGGGCGCGCGGGATGCA
1957	85	23	CUST_28_PI429446426	CUST_28_PI429446426	FALSE									12Gtl2#1copy	unmapped				CTGACACATTCAGAAAGCTCTTTTT
[truncated: 13,788 more rows]

## Sheet: Samples
Samples	Name	Cy3	Cy5	formamide
1	A-RNA_mix_0	A-RNA mix	0% (A-RNA mix)	0
2	2%_0	A-RNA mix	0.02	0
3	8%_0	A-RNA mix	0.08	0
4	16%_0	A-RNA mix	0.16	0
5	32%_0	A-RNA mix	0.32	0
6	100%_0	A-RNA mix	1	0
1	A-RNA_mix_5	A-RNA mix	0% (A-RNA mix)	5
2	2%_5	A-RNA mix	0.02	5
3	8%_5	A-RNA mix	0.08	5
4	16%_5	A-RNA mix	0.16	5
5	32%_5	A-RNA mix	0.32	5
6	100%_5	A-RNA mix	1	5
1	A-RNA_mix_10	A-RNA mix	0% (A-RNA mix)	10
2	2%_10	A-RNA mix	0.02	10
3	8%_10	A-RNA mix	0.08	10
4	16%_10	A-RNA mix	0.16	10
5	32%_10	A-RNA mix	0.32	10
6	100%_10	A-RNA mix	1	10
1	A-RNA_mix_20	A-RNA mix	0% (A-RNA mix)	20
2	2%_20	A-RNA mix	0.02	20
3	8%_20	A-RNA mix	0.08	20
4	16%_20	A-RNA mix	0.16	20
5	32%_20	A-RNA mix	0.32	20
6	100%_20	A-RNA mix	1	20
