# Supplementary material
Source: HighWire-hosted journal article supplement (doi:10.1101/rna.051474.115)
Supplement: TableS2.xlsx [file TableS2.xlsx]

## Sheet: Sheet1
Gene	Ensembl	ProbeUID	Sequence	probe_coord	peak_coord	strand	probeID	MettL4.KO_vs_SCR.Ctl	MettL4.KO_vs_SCR.Ctl.1	MettL4.KO_vs_SCR.Ctl.2	DZA_vs_SCR.Ctl	DZA_vs_SCR.Ctl.1	DZA_vs_SCR.Ctl.2	MettL4.KO_vs_MettL4.KO	MettL4.KO_vs_MettL4.KO.1	MettL4.KO_vs_MettL4.KO.2	MettL4 KO_vs_SCR Ctl FDR	DZA_vs_SCR Ctl FDR	MettL4.KO_vs_SCR.Ctl.P.Val	DZA_vs_SCR.Ctl.P.Val	MettL4.KO_vs_MettL4.KO.P.Val	Sig.Cnt	Sig.probes **
Irak3	ENSMUSG00000020227	329124	GGAGGGAAACTTCAGTGACAGTCCC	chr10:120143223-120143247_-	chr10:120142599-120143247_-	-	91700_m6a_chr10:120142599-120143247_-	0.248971	-1.64004	0.338589	-0.586256	0.307236	0.865203	-0.738237	-1.23488		1	1	0.914247	0.828995	0.923272	0
Irak3	ENSMUSG00000020227	803751	AAACACGGAGGGAAACTTCAGTGAC	chr10:120143217-120143241_-	chr10:120142599-120143247_-	-	91699_m6a_chr10:120142599-120143247_-			-0.348169	1.12395		0.465068			-0.106824	1	1	1	0.427142	1	0
Irak3	ENSMUSG00000020227	600782	GCACACAAACACGGAGGGAAACTTC	chr10:120143211-120143235_-	chr10:120142599-120143247_-	-	91698_m6a_chr10:120142599-120143247_-		1.63818	-1.33285		-0.068593	-0.299077	0.706038	0.17132	-0.0727772	1	1	0.664833	0.959533	0.199473	0
Irak3	ENSMUSG00000020227	658459	AAGCAAGCACACAAACACGGAGGGA	chr10:120143205-120143229_-	chr10:120142599-120143247_-	-	91697_m6a_chr10:120142599-120143247_-	0.557638		-1.56186	-0.417316	-0.407617	0.0985203	-1.7148	1.05197	0.122563	1	1	0.804322	0.984959	0.587225	0
Irak3	ENSMUSG00000020227	356956	GCAAGGAAGCAAGCACACAAACACG	chr10:120143199-120143223_-	chr10:120142599-120143247_-	-	91696_m6a_chr10:120142599-120143247_-	0.685633			-1.07713	-0.797493		-0.148421	-0.631042		1	1	1	0.973173	0.83179	0
Irak3	ENSMUSG00000020227	201667	TGAACGGCAAGGAAGCAAGCACACA	chr10:120143193-120143217_-	chr10:120142599-120143247_-	-	91695_m6a_chr10:120142599-120143247_-	1.00101	0.900686	-0.847934		1.11627	1.08148	-1.06763			1	0.714424	0.803284	0.0145175	1	0
Irak3	ENSMUSG00000020227	726946	AGGACCTGAACGGCAAGGAAGCAAG	chr10:120143187-120143211_-	chr10:120142599-120143247_-	-	91694_m6a_chr10:120142599-120143247_-	-0.64528	-1.20775	0.066417		-0.495258			-0.484903		1	1	0.97524	1	1	0
Irak3	ENSMUSG00000020227	145325	GAGGACAGGACCTGAACGGCAAGGA	chr10:120143181-120143205_-	chr10:120142599-120143247_-	-	91693_m6a_chr10:120142599-120143247_-	0.915723		-0.348169	0.662917	0.187235	-0.991125	0.330904	1.08986		1	1	0.769641	0.869958	0.160679	0
Irak3	ENSMUSG00000020227	236191	TCCAGAGAGGACAGGACCTGAACGG	chr10:120143175-120143199_-	chr10:120142599-120143247_-	-	91692_m6a_chr10:120142599-120143247_-	-0.813788				-0.194904	-2.04535	-0.559572		1.25725	1	1	1	0.851547	0.390558	0
Irak3	ENSMUSG00000020227	118866	GTGCTCTCCAGAGAGGACAGGACCT	chr10:120143169-120143193_-	chr10:120142599-120143247_-	-	91691_m6a_chr10:120142599-120143247_-	1.19925	1.8435	1.6065	1.35838	1.40847	0.624661	0.419142	-0.201312	0.213881	0.2277	0.930446	0.0497744	0.122407	0.288739	0
Irak3	ENSMUSG00000020227	232473	GGCTGGGTGCTCTCCAGAGAGGACA	chr10:120143163-120143187_-	chr10:120142599-120143247_-	-	91690_m6a_chr10:120142599-120143247_-	1.7791	2.13723	2.0045	1.74371	1.24858	1.11089	0.424762	0.0555962	0.401464	0.000767343	0.194925	0.00565373	0.038693	0.0758834	1
Irak3	ENSMUSG00000020227	458138	AAGCTAGGCTGGGTGCTCTCCAGAG	chr10:120143157-120143181_-	chr10:120142599-120143247_-	-	91689_m6a_chr10:120142599-120143247_-	1.91544	2.6183	2.23708	2.09802	1.40767	1.30297	0.798006	0.241872	-0.0233244	1.89972e-07	0.00725746	0.0125493	0.0355194	0.161242	2	**
Irak3	ENSMUSG00000020227	71936	AAATACAAGCTAGGCTGGGTGCTCT	chr10:120143151-120143175_-	chr10:120142599-120143247_-	-	91688_m6a_chr10:120142599-120143247_-	0.526924	0.285259	0.725175	0.535872	0.749467	1.00043	-0.0259636	0.197733	-0.423403	0.987988	0.241772	0.968968	0.386713	0.692981	1
Irak3	ENSMUSG00000020227	218311	TCTGCAAAATACAAGCTAGGCTGGG	chr10:120143145-120143169_-	chr10:120142599-120143247_-	-	91687_m6a_chr10:120142599-120143247_-	0.278938		-0.611074	0.610325	0.879962	-0.437295	0.41596	-0.631042	-0.490506	1	1	0.883858	0.771166	0.743546	0
Irak3	ENSMUSG00000020227	305936	GGGTCTTCTGCAAAATACAAGCTAG	chr10:120143139-120143163_-	chr10:120142599-120143247_-	-	91686_m6a_chr10:120142599-120143247_-	0.579121	-2.00858	-1.25905		0.00969061		-0.520281	0.0611174		1	1	0.933706	1	0.728071	0
Irak3	ENSMUSG00000020227	172537	GTGGGAGGGTCTTCTGCAAAATACA	chr10:120143133-120143157_-	chr10:120142599-120143247_-	-	91685_m6a_chr10:120142599-120143247_-	1.00074	0.659885	0.164418	-0.333197	0.175551	0.616494	0.568329	0.942672	-0.605599	1	1	0.875532	0.912112	0.305678	0
Irak3	ENSMUSG00000020227	600646	AAGGACGTGGGAGGGTCTTCTGCAA	chr10:120143127-120143151_-	chr10:120142599-120143247_-	-	91684_m6a_chr10:120142599-120143247_-	1.00587	0.932302	1.04559	0.19464	0.117688	0.783984	-0.0470997	0.0131966	0.13619	0.00526558	1	0.546324	0.881959	0.431769	0
Irak3	ENSMUSG00000020227	348898	GACTTCAAGGACGTGGGAGGGTCTT	chr10:120143121-120143145_-	chr10:120142599-120143247_-	-	91683_m6a_chr10:120142599-120143247_-	1.20827	0.778241	0.930324	0.667539	0.679985	1.04533	0.0904368	0.378481	0.730662	0.904392	1	0.574081	0.292648	0.0895751	0
Irak3	ENSMUSG00000020227	229647	CTGAAGGACTTCAAGGACGTGGGAG	chr10:120143115-120143139_-	chr10:120142599-120143247_-	-	91682_m6a_chr10:120142599-120143247_-	0.900194		-0.611074		0.918069	0.0105819	0.105417	-0.484903		1	1	0.769501	0.662139	0.699212	0
Irak3	ENSMUSG00000020227	333257	GGACACCTGAAGGACTTCAAGGACG	chr10:120143109-120143133_-	chr10:120142599-120143247_-	-	91681_m6a_chr10:120142599-120143247_-	1.42517	0.27904	-0.100389	1.16407	1.58741	1.17822	-0.379028	0.429552		1	0.267086	0.791092	0.0254024	0.498683	0
Irak3	ENSMUSG00000020227	859433	GGAGAAGGACACCTGAAGGACTTCA	chr10:120143103-120143127_-	chr10:120142599-120143247_-	-	91680_m6a_chr10:120142599-120143247_-		-1.44134	-0.348169	-0.728936	-0.0387653	1.99862	-0.246227	0.88067	0.1926	1	1	0.910556	0.628314	0.26122	0
Irak3	ENSMUSG00000020227	854354	AACAGTGGAGAAGGACACCTGAAGG	chr10:120143097-120143121_-	chr10:120142599-120143247_-	-	91679_m6a_chr10:120142599-120143247_-	1.95641	1.29628	0.924482	-0.180119	-0.0790454	-0.0908731	0.685112			0.730943	1	0.161076	0.999271	1	0
Irak3	ENSMUSG00000020227	294575	TCCAAGAACAGTGGAGAAGGACACC	chr10:120143091-120143115_-	chr10:120142599-120143247_-	-	91678_m6a_chr10:120142599-120143247_-	0.122996	0.698953	0.749083	0.253611	0.463699		0.370282	1.05197		1	1	0.929185	0.909416	0.146499	0
Irak3	ENSMUSG00000020227	533539	ACATTATCCAAGAACAGTGGAGAAG	chr10:120143085-120143109_-	chr10:120142599-120143247_-	-	91677_m6a_chr10:120142599-120143247_-	0.745228		-0.494542	-0.454788	-0.452744	-1.9675	1.30058	0.427687		1	1	0.803565	0.960043	0.152446	0
Irak3	ENSMUSG00000020227	501061	CTTGGGACATTATCCAAGAACAGTG	chr10:120143079-120143103_-	chr10:120142599-120143247_-	-	91676_m6a_chr10:120142599-120143247_-	-1.44411	3.5259		3.10005						1	1	0.494628	1	1	0
Irak3	ENSMUSG00000020227	321136	GGAATACTTGGGACATTATCCAAGA	chr10:120143073-120143097_-	chr10:120142599-120143247_-	-	91675_m6a_chr10:120142599-120143247_-	-0.203048			0.957687		0.465068	0.260617			1	1	1	0.508243	1	0
Irak3	ENSMUSG00000020227	394955	TCTACTGGAATACTTGGGACATTAT	chr10:120143067-120143091_-	chr10:120142599-120143247_-	-	91674_m6a_chr10:120142599-120143247_-	0.275786		0.066417		1.11516	-0.0588489	2.10178			1	1	0.959961	0.599445	1	0
Irak3	ENSMUSG00000020227	427075	TCATCTTCTACTGGAATACTTGGGA	chr10:120143061-120143085_-	chr10:120142599-120143247_-	-	91673_m6a_chr10:120142599-120143247_-	0.65589			1.87633	1.00021		0.531282	-0.754777	1.1326	1	1	1	0.173882	0.33274	0
Irak3	ENSMUSG00000020227	396353	TTTTCATCATCTTCTACTGGAATAC	chr10:120143055-120143079_-	chr10:120142599-120143247_-	-	91672_m6a_chr10:120142599-120143247_-	0.347742	-0.280394	0.066417	-0.728936	-0.495258	1.15507	0.889024	1.32752		1	1	0.982814	0.831049	0.0634846	0
Irak3	ENSMUSG00000020227	156220	TTCTGGTTTTCATCATCTTCTACTG	chr10:120143049-120143073_-	chr10:120142599-120143247_-	-	91671_m6a_chr10:120142599-120143247_-	0.498938			1.28591	0.465003	-0.967432	0.297083		0.135172	1	1	1	0.720138	0.126694	0
Irak3	ENSMUSG00000020227	156549	TGGTTATTCTGGTTTTCATCATCTT	chr10:120143043-120143067_-	chr10:120142599-120143247_-	-	91670_m6a_chr10:120142599-120143247_-	0.452131	-0.55379	-0.630275	-0.13723	-0.167701	3.55294	0.195678		-0.430997	1	1	0.964747	0.397755	0.634807	0
Irak3	ENSMUSG00000020227	460432	ACTGAATGGTTATTCTGGTTTTCAT	chr10:120143037-120143061_-	chr10:120142599-120143247_-	-	91669_m6a_chr10:120142599-120143247_-			-0.136992		0.0518719		1.21071		-0.106824	1	1	1	1	0.284829	0
Irak3	ENSMUSG00000020227	852917	GGAGGTACTGAATGGTTATTCTGGT	chr10:120143031-120143055_-	chr10:120142599-120143247_-	-	91668_m6a_chr10:120142599-120143247_-	0.0333007	0.698953	0.066417	-1.66197	0.373799	-0.7388	-0.250841	-1.48599	-0.76047	1	1	0.961319	0.929255	0.930248	0
Irak3	ENSMUSG00000020227	287222	TCCTTGGGAGGTACTGAATGGTTAT	chr10:120143025-120143049_-	chr10:120142599-120143247_-	-	91667_m6a_chr10:120142599-120143247_-	2.62201	2.38872		0.644927	1.36477	1.89471	0.60593	0.320181	0.880461	0.0369973	1	0.0245984	0.12417	0.0350194	0
Irak3	ENSMUSG00000020227	845083	AAAACTTCCTTGGGAGGTACTGAAT	chr10:120143019-120143043_-	chr10:120142599-120143247_-	-	91666_m6a_chr10:120142599-120143247_-	0.291259	-0.0969684	-0.649878	1.12395	0.373431	-0.321127	0.457797		-0.413813	1	1	0.974023	0.741597	0.501167	0
Irak3	ENSMUSG00000020227	891547	GTCCCCAAAACTTCCTTGGGAGGTA	chr10:120143013-120143037_-	chr10:120142599-120143247_-	-	91665_m6a_chr10:120142599-120143247_-	0.979084	1.98057	2.07617	0.668264	0.372864	1.93213	-1.04687	-1.41845	-0.376457	0.136171	1	0.0961643	0.312636	0.956959	0
Irak3	ENSMUSG00000020227	786277	CTATCTGTCCCCAAAACTTCCTTGG	chr10:120143007-120143031_-	chr10:120142599-120143247_-	-	91664_m6a_chr10:120142599-120143247_-	0.463122	0.600589	1.1864	0.913611	0.407759	0.894125	-0.00125618	-0.177636	0.373431	1	1	0.810838	0.455855	0.411636	0
Irak3	ENSMUSG00000020227	626999	GTCACTCTATCTGTCCCCAAAACTT	chr10:120143001-120143025_-	chr10:120142599-120143247_-	-	91663_m6a_chr10:120142599-120143247_-	0.350799	-0.250736	-0.616851	-0.73056	-0.335318	1.33002	-0.298416	-1.23794	-0.302924	1	1	0.973299	0.788165	0.910776	0
Irak3	ENSMUSG00000020227	16	TTCTGAGTCACTCTATCTGTCCCCA	chr10:120142995-120143019_-	chr10:120142599-120143247_-	-	91662_m6a_chr10:120142599-120143247_-	0.926715	0.552267	0.747204	1.33187	0.959734	1.76455	0.853849	0.0672993	-0.196278	1	0.350713	0.929647	0.0561172	0.280436	0
Irak3	ENSMUSG00000020227	78693	GGGGTTTTCTGAGTCACTCTATCTG	chr10:120142989-120143013_-	chr10:120142599-120143247_-	-	91661_m6a_chr10:120142599-120143247_-	1.9473	1.08878	2.80453	0.787545	1.39708	1.68163	0.1565	0.734608	0.0655663	0.0124556	0.604187	0.0978752	0.0813869	0.147038	0
Irak3	ENSMUSG00000020227	250064	TCAAAGGGGGTTTTCTGAGTCACTC	chr10:120142983-120143007_-	chr10:120142599-120143247_-	-	91660_m6a_chr10:120142599-120143247_-	2.18523	2.09265	1.96334	2.02405	1.45553	1.27928	-0.191756	0.513519	0.605223	2.82219e-06	0.00656312	0.00176069	0.0304457	0.187279	1
Irak3	ENSMUSG00000020227	223705	CTGCATTCAAAGGGGGTTTTCTGAG	chr10:120142977-120143001_-	chr10:120142599-120143247_-	-	91659_m6a_chr10:120142599-120143247_-	0.672511	0.790729	2.44561	0.174833	1.27951	-1.0225	0.528418	0.291676	-0.639007	0.00460311	1	0.324204	0.760506	0.463607	0
Irak3	ENSMUSG00000020227	51253	GACTGGCTGCATTCAAAGGGGGTTT	chr10:120142971-120142995_-	chr10:120142599-120143247_-	-	91658_m6a_chr10:120142599-120143247_-	1.66342	1.51691	1.64041	1.30281	1.50014	1.1611	-0.196947	0.0323645	0.206573	2.51993e-06	0.000756505	0.0027761	0.0127588	0.528976	1
Irak3	ENSMUSG00000020227	775732	ACCTCAGACTGGCTGCATTCAAAGG	chr10:120142965-120142989_-	chr10:120142599-120143247_-	-	91657_m6a_chr10:120142599-120143247_-	0.752867	0.979108	1.92789	1.45839	0.899298	0.444594	-0.0636921	-0.240344	-0.558889	0.000807362	0.0513502	0.300878	0.268702	0.917614	0
Irak3	ENSMUSG00000020227	799962	AAGGTGACCTCAGACTGGCTGCATT	chr10:120142959-120142983_-	chr10:120142599-120143247_-	-	91656_m6a_chr10:120142599-120143247_-	0.471378	1.65685	1.68704	1.15747	0.23215	0.749784	-0.770969	0.330286	-0.283178	1.33948e-05	0.139424	0.282936	0.506104	0.753397	0
Irak3	ENSMUSG00000020227	837678	CCTAGAAAGGTGACCTCAGACTGGC	chr10:120142953-120142977_-	chr10:120142599-120143247_-	-	91655_m6a_chr10:120142599-120143247_-	1.24223	1.16302	1.70228	-0.048294	0.880539	0.334873	-0.0889597	0.28953	-0.290107	5.40513e-08	0.96019	0.0792793	0.826563	0.608532	0
Irak3	ENSMUSG00000020227	527898	TCCAAGCCTAGAAAGGTGACCTCAG	chr10:120142947-120142971_-	chr10:120142599-120143247_-	-	91654_m6a_chr10:120142599-120143247_-	0.356541	-0.182374	1.18785	0.295139	0.49645	0.392603	-0.292679		-0.654538	1	1	0.84755	0.984558	0.888909	0
Irak3	ENSMUSG00000020227	355266	TTTCGGTCCAAGCCTAGAAAGGTGA	chr10:120142941-120142965_-	chr10:120142599-120143247_-	-	91653_m6a_chr10:120142599-120143247_-	0.0509674	-0.280394	0.365025		0.614276	-0.0908731	0.7483	0.427687	-1.96985	1	1	0.981942	0.790514	0.615595	0
Irak3	ENSMUSG00000020227	457663	CCTCTGTTTCGGTCCAAGCCTAGAA	chr10:120142935-120142959_-	chr10:120142599-120143247_-	-	91652_m6a_chr10:120142599-120143247_-	1.71801	1.86955	1.97178	1.34143	1.39109	1.33232	-0.0928042	0.433404	-0.27081	0.000252371	0.0467038	0.00368301	0.000410211	0.500545	1
Irak3	ENSMUSG00000020227	196032	CTGTTCCCTCTGTTTCGGTCCAAGC	chr10:120142929-120142953_-	chr10:120142599-120143247_-	-	91651_m6a_chr10:120142599-120143247_-	1.57979	1.56128	1.19758	0.868649	1.17414	1.42319	0.206191	0.148427	0.240083	0.0435555	0.369785	0.0347182	0.0560781	0.0113382	0
Irak3	ENSMUSG00000020227	332048	CTTCCCCTGTTCCCTCTGTTTCGGT	chr10:120142923-120142947_-	chr10:120142599-120143247_-	-	91650_m6a_chr10:120142599-120143247_-	1.16496	1.2276	1.23581	2.16575	1.09812	1.15736	0.630826	0.61046	0.612433	1	0.603482	0.00555402	0.0804053	5.95215e-05	0
Irak3	ENSMUSG00000020227	207488	GCTTCACTTCCCCTGTTCCCTCTGT	chr10:120142917-120142941_-	chr10:120142599-120143247_-	-	91649_m6a_chr10:120142599-120143247_-	1.26231	1.23593	0.931028	1.57817	1.12768	1.26431	0.00878806	0.612369	0.40833	0.438739	0.221627	0.153968	0.0226113	0.106595	0
Irak3	ENSMUSG00000020227	940146	CAATCCGCTTCACTTCCCCTGTTCC	chr10:120142911-120142935_-	chr10:120142599-120143247_-	-	91648_m6a_chr10:120142599-120143247_-	-0.930682	0.399553	0.369009	-0.172292	-1.3664	0.0703243	-1.62769	0.0585287	-0.112967	1	1	0.93086	0.943578	0.805329	0
Irak3	ENSMUSG00000020227	148830	ACGTTGCAATCCGCTTCACTTCCCC	chr10:120142905-120142929_-	chr10:120142599-120143247_-	-	91647_m6a_chr10:120142599-120143247_-	1.58627	2.19836	0.510779	1.67633	1.07957	1.64165	-0.230612	-0.0552609	0.275966	0.0615279	0.0771275	0.236369	0.0304009	0.563495	0
Irak3	ENSMUSG00000020227	791641	CTGGGCACGTTGCAATCCGCTTCAC	chr10:120142899-120142923_-	chr10:120142599-120143247_-	-	91646_m6a_chr10:120142599-120143247_-	1.63423	2.33627	2.46001	1.63552	1.76566	1.21009	0.128742	0.456441	0.10256	0.00112465	0.146765	0.0234721	0.0197294	0.106298	1
Irak3	ENSMUSG00000020227	568935	GAAGAACTGGGCACGTTGCAATCCG	chr10:120142893-120142917_-	chr10:120142599-120143247_-	-	91645_m6a_chr10:120142599-120143247_-	1.50455	1.53621	2.13487	1.279	1.11082	0.81725	-0.194217	0.228848	-0.497714	0.00254363	0.378224	0.0356422	0.0606383	0.756377	0
Irak3	ENSMUSG00000020227	428895	TCATGAGAAGAACTGGGCACGTTGC	chr10:120142887-120142911_-	chr10:120142599-120143247_-	-	91644_m6a_chr10:120142599-120143247_-	1.23378	0.27904	1.10538	0.76235	1.13922	0.284294	0.0821016	1.13957	0.685719	1	1	0.642949	0.48448	0.0918316	0
Irak3	ENSMUSG00000020227	119529	CATTCCTCATGAGAAGAACTGGGCA	chr10:120142881-120142905_-	chr10:120142599-120143247_-	-	91643_m6a_chr10:120142599-120143247_-	1.77108	0.0787766	0.699408		0.701781	-0.411971		1.08986	-0.129433	1	1	0.604369	0.754501	0.295371	0
Irak3	ENSMUSG00000020227	353827	GACCAGCATTCCTCATGAGAAGAAC	chr10:120142875-120142899_-	chr10:120142599-120143247_-	-	91642_m6a_chr10:120142599-120143247_-	-0.486874		-0.936497	0.764112	0.440911	-0.828727	-0.867824	-0.631042	0.295074	1	1	0.958406	0.826367	0.823089	0
Irak3	ENSMUSG00000020227	739964	TCTGGGGACCAGCATTCCTCATGAG	chr10:120142869-120142893_-	chr10:120142599-120143247_-	-	91641_m6a_chr10:120142599-120143247_-	1.48752	1.80123	2.1413	0.690352	0.832097	0.627714	0.200576	-0.582084	0.552156	0.0297906	1	0.0250685	0.506061	0.464972	0
Irak3	ENSMUSG00000020227	177061	ACAAGCTCTGGGGACCAGCATTCCT	chr10:120142863-120142887_-	chr10:120142599-120143247_-	-	91640_m6a_chr10:120142599-120143247_-	1.12383	1.14718	0.805189	0.911167	0.896287	0.779327	-0.300006	-0.84672	0.181038	0.816586	1	0.41643	0.0370493	0.817697	0
Irak3	ENSMUSG00000020227	708339	GGCGCCACAAGCTCTGGGGACCAGC	chr10:120142857-120142881_-	chr10:120142599-120143247_-	-	91639_m6a_chr10:120142599-120143247_-	1.56205	2.03866	1.55347	1.49211	1.19417	0.975064	0.426933	-0.156103	-0.239845	0.0168262	0.349045	0.02314	0.0392611	0.522335	1
Irak3	ENSMUSG00000020227	810457	TGGGATGGCGCCACAAGCTCTGGGG	chr10:120142851-120142875_-	chr10:120142599-120143247_-	-	91638_m6a_chr10:120142599-120143247_-	0.44062	2.13297	1.73939	0.662165	0.245796	0.367422	-0.93165	-0.844367	-1.01919	0.0718301	1	0.240646	0.929242	0.99861	0
Irak3	ENSMUSG00000020227	141869	AAGTCCTGGGATGGCGCCACAAGCT	chr10:120142845-120142869_-	chr10:120142599-120143247_-	-	91637_m6a_chr10:120142599-120143247_-	1.91363	2.08272	2.30656	1.85629	1.25949	1.86756	0.0841452	0.85999	0.693211	0.0604437	0.54793	0.00524746	0.0212293	0.0785891	1
Irak3	ENSMUSG00000020227	832596	GGACTTAAGTCCTGGGATGGCGCCA	chr10:120142839-120142863_-	chr10:120142599-120143247_-	-	91636_m6a_chr10:120142599-120143247_-	0.222767		0.777086	0.644927	1.59061		-0.778242	0.706252	1.1326	1	1	0.838623	0.276498	0.313158	0
Irak3	ENSMUSG00000020227	127868	ACAGTAGGACTTAAGTCCTGGGATG	chr10:120142833-120142857_-	chr10:120142599-120143247_-	-	91635_m6a_chr10:120142599-120143247_-			-0.494542	1.87755	-0.186873	0.0612273	0.534314	-0.631042		1	1	1	0.571932	0.539109	0
Irak3	ENSMUSG00000020227	23061	CTGATCACAGTAGGACTTAAGTCCT	chr10:120142827-120142851_-	chr10:120142599-120143247_-	-	91634_m6a_chr10:120142599-120143247_-	1.06203				-0.0145222	0.625251				1	1	1	0.789999	1	0
Irak3	ENSMUSG00000020227	109881	CCCAAACTGATCACAGTAGGACTTA	chr10:120142821-120142845_-	chr10:120142599-120143247_-	-	91633_m6a_chr10:120142599-120143247_-	1.00101	0.851657	1.12229	1.17883	0.345107	0.0186551		0.495331	0.564564	1	1	0.532903	0.692324	0.0217271	0
Irak3	ENSMUSG00000020227	799532	GACGAGCCCAAACTGATCACAGTAG	chr10:120142815-120142839_-	chr10:120142599-120143247_-	-	91632_m6a_chr10:120142599-120143247_-	0.403215	-0.683232	0.946512	0.0409974	-0.821613	2.85665	-0.512434	-2.35088	0.47989	1	1	0.876803	0.508195	0.786061	0
Irak3	ENSMUSG00000020227	870082	TCCCAAGACGAGCCCAAACTGATCA	chr10:120142809-120142833_-	chr10:120142599-120143247_-	-	91631_m6a_chr10:120142599-120143247_-	0.699352		0.353353		0.515764	2.32484	-0.585286		-0.755588	1	0.166646	0.888302	0.289799	0.96114	0
Irak3	ENSMUSG00000020227	471395	GGTACTTCCCAAGACGAGCCCAAAC	chr10:120142803-120142827_-	chr10:120142599-120143247_-	-	91630_m6a_chr10:120142599-120143247_-	1.8757	1.93097	1.65461	0.913628	1.35896	1.54876	-0.0182881	0.00415411	-0.192042	0.0107624	0.311833	0.00519943	0.0490181	0.86254	1
Irak3	ENSMUSG00000020227	727849	TGGCCTGGTACTTCCCAAGACGAGC	chr10:120142797-120142821_-	chr10:120142599-120143247_-	-	91629_m6a_chr10:120142599-120143247_-	1.33092	2.17041	1.4252	1.43845	1.13988	0.973205	0.306957	0.258735	0.446183	0.478329	1	0.0681939	0.0378511	0.0153125	0
Irak3	ENSMUSG00000020227	541423	TAAGAATGGCCTGGTACTTCCCAAG	chr10:120142791-120142815_-	chr10:120142599-120143247_-	-	91628_m6a_chr10:120142599-120143247_-	1.36988	1.13748	0.887319	1.938	0.943835	0.438766	0.589053	-0.0246995	0.261412	1	1	0.220846	0.235076	0.145806	0
Irak3	ENSMUSG00000020227	392318	CTCCCATAAGAATGGCCTGGTACTT	chr10:120142785-120142809_-	chr10:120142599-120143247_-	-	91627_m6a_chr10:120142599-120143247_-	2.19003	2.35402	1.71857	1.9574	1.53568	1.06009	0.76825	-0.383412	0.499509	0.0202523	0.438083	0.0146369	0.0454443	0.258615	1
Irak3	ENSMUSG00000020227	710163	GGCTTGCTCCCATAAGAATGGCCTG	chr10:120142779-120142803_-	chr10:120142599-120143247_-	-	91626_m6a_chr10:120142599-120143247_-	1.66097	2.58165	1.61195	1.75261	1.1902	1.00289	0.459599	-0.112638	-0.157592	0.0568405	0.679397	0.0471787	0.0588032	0.430329	0
Irak3	ENSMUSG00000020227	59156	TCCATTGGCTTGCTCCCATAAGAAT	chr10:120142773-120142797_-	chr10:120142599-120143247_-	-	91625_m6a_chr10:120142599-120143247_-	0.25143	-0.293701	0.502888	0.152704	0.239892	0.414746	0.263858	-3.33937	-0.243023	1	1	0.965307	0.985877	0.789294	0
Irak3	ENSMUSG00000020227	698196	CTCTTCTCCATTGGCTTGCTCCCAT	chr10:120142767-120142791_-	chr10:120142599-120143247_-	-	91624_m6a_chr10:120142599-120143247_-	0.571557	1.01945	0.903569	0.139941	0.239181	0.8191	-0.412122	-0.015692	-0.0467784	1	1	0.830751	0.864159	0.855295	0
Irak3	ENSMUSG00000020227	495040	GAACACCTCTTCTCCATTGGCTTGC	chr10:120142761-120142785_-	chr10:120142599-120143247_-	-	91623_m6a_chr10:120142599-120143247_-	1.79747	2.30529	1.45804	1.25556	0.934727	1.09263	0.358666	0.204748	0.411695	0.276736	1	0.0369481	0.0277558	0.0199343	0
Irak3	ENSMUSG00000020227	756503	CCAGAGGAACACCTCTTCTCCATTG	chr10:120142755-120142779_-	chr10:120142599-120143247_-	-	91622_m6a_chr10:120142599-120143247_-	0.192864	0.240614	-1.38332	-0.524523	-0.647472	1.19931	-0.299994	-1.62175	-1.49747	1	1	0.933727	0.821717	0.945006	0
Irak3	ENSMUSG00000020227	676586	AAGAGCCCAGAGGAACACCTCTTCT	chr10:120142749-120142773_-	chr10:120142599-120143247_-	-	91621_m6a_chr10:120142599-120143247_-	1.24327	0.686816	0.546258	0.321462	0.427371	0.787005	-0.169212	-0.407272	-0.998295	1	1	0.749721	0.859239	0.922008	0
Irak3	ENSMUSG00000020227	93257	CTGCAAAAGAGCCCAGAGGAACACC	chr10:120142743-120142767_-	chr10:120142599-120143247_-	-	91620_m6a_chr10:120142599-120143247_-	-0.115198		0.139148	-1.80247	0.694746	-0.771007	-0.241178	0.081954	-0.639007	1	1	0.95921	0.897629	0.8504	0
Irak3	ENSMUSG00000020227	562411	TGCTCACTGCAAAAGAGCCCAGAGG	chr10:120142737-120142761_-	chr10:120142599-120143247_-	-	91619_m6a_chr10:120142599-120143247_-	0.628714	0.824303	0.422905	-0.0518057	0.332145	-0.089341	0.290209	0.811434	0.437628	1	1	0.957891	0.980062	0.0437264	0
Irak3	ENSMUSG00000020227	891751	TGTTCATGCTCACTGCAAAAGAGCC	chr10:120142731-120142755_-	chr10:120142599-120143247_-	-	91618_m6a_chr10:120142599-120143247_-	0.775126	0.14668	0.068539	-0.417905	-0.585779	2.21713	-0.929612	1.08415	-0.125877	1	1	0.952009	0.618553	0.508479	0
Irak3	ENSMUSG00000020227	528249	TTGGACTGTTCATGCTCACTGCAAA	chr10:120142725-120142749_-	chr10:120142599-120143247_-	-	91617_m6a_chr10:120142599-120143247_-	1.05919	0.813263	2.2256	0.911077	1.06468	1.11655	0.102121	-0.272267	1.11508	0.245855	1	0.24407	0.0183584	0.277391	0
Irak3	ENSMUSG00000020227	749401	TGCTTTTTGGACTGTTCATGCTCAC	chr10:120142719-120142743_-	chr10:120142599-120143247_-	-	91616_m6a_chr10:120142599-120143247_-	1.14739	-0.27494	0.668262	-0.0494133	0.482001	1.13802	0.0927657	-0.188074	-1.38958	1	1	0.817376	0.68566	0.813908	0
Irak3	ENSMUSG00000020227	163981	ATTCACTGCTTTTTGGACTGTTCAT	chr10:120142713-120142737_-	chr10:120142599-120143247_-	-	91615_m6a_chr10:120142599-120143247_-	0.915723	-0.222371		-1.13116	0.280391	0.464649	-0.726657	0.181346		1	1	0.771659	0.882454	0.684029	0
Irak3	ENSMUSG00000020227	945265	TGGTGGATTCACTGCTTTTTGGACT	chr10:120142707-120142731_-	chr10:120142599-120143247_-	-	91614_m6a_chr10:120142599-120143247_-	1.08922	1.55663	1.7805	0.753789	-0.36237	0.663983	-1.19019	0.427558	-0.139874	0.0483298	1	0.0720859	0.792892	0.717859	0
Irak3	ENSMUSG00000020227	361202	ATCTTCTGGTGGATTCACTGCTTTT	chr10:120142701-120142725_-	chr10:120142599-120143247_-	-	91613_m6a_chr10:120142599-120143247_-	1.99315	1.93631	1.97952	1.63969	1.68123	1.57534	0.319998	0.519179	0.593509	0.0153924	0.213712	0.00015566	0.000566442	0.01543	0
Irak3	ENSMUSG00000020227	511786	TGCTTGATCTTCTGGTGGATTCACT	chr10:120142695-120142719_-	chr10:120142599-120143247_-	-	91612_m6a_chr10:120142599-120143247_-	2.1074	2.61572	1.88181	1.10552	1.36941	1.22107	0.462983	1.01598	0.301679	0.00516161	1	0.0155285	0.0106765	0.0594346	1
Irak3	ENSMUSG00000020227	522708	ATTTTTTGCTTGATCTTCTGGTGGA	chr10:120142689-120142713_-	chr10:120142599-120143247_-	-	91611_m6a_chr10:120142599-120143247_-	0.498938	2.80098	-1.02901	-0.636017	0.918069		0.570251	0.253049	0.969618	1	1	0.575967	0.703241	0.0547119	0
Irak3	ENSMUSG00000020227	881697	GCTTTTATTTTTTGCTTGATCTTCT	chr10:120142683-120142707_-	chr10:120142599-120143247_-	-	91610_m6a_chr10:120142599-120143247_-	0.745228	0.61604	1.56308	-0.454788	-0.705513	2.5136	0.14822		0.372749	0.290711	1	0.528775	0.589717	0.140868	0
Irak3	ENSMUSG00000020227	712554	ACGTTTGCTTTTATTTTTTGCTTGA	chr10:120142677-120142701_-	chr10:120142599-120143247_-	-	91609_m6a_chr10:120142599-120143247_-	1.06203	-0.0322373	-0.100389		-0.407617		0.744963	-0.271827	0.0267821	1	1	0.895612	1	0.341076	0
Irak3	ENSMUSG00000020227	221426	TCAGTGACGTTTGCTTTTATTTTTT	chr10:120142671-120142695_-	chr10:120142599-120143247_-	-	91608_m6a_chr10:120142599-120143247_-	0.65589		0.946512	-1.25738	0.221631	-0.244433	1.24859	-1.09239		0.884352	1	0.798284	0.940051	0.485187	0
Irak3	ENSMUSG00000020227	102625	GTGCCTTCAGTGACGTTTGCTTTTA	chr10:120142665-120142689_-	chr10:120142599-120143247_-	-	91607_m6a_chr10:120142599-120143247_-	2.05621	2.03479	1.86795	1.56261	2.1348	1.85912	-0.0481259	0.0830826	0.567535	2.49647e-06	5.69026e-05	0.00180615	0.0102792	0.221862	1
Irak3	ENSMUSG00000020227	242096	TGCTCAGTGCCTTCAGTGACGTTTG	chr10:120142659-120142683_-	chr10:120142599-120143247_-	-	91606_m6a_chr10:120142599-120143247_-	2.03573	1.99724	2.48532	1.3663	1.63883	1.3777	0.286744	-0.160612	0.255774	4.70042e-10	0.000858311	0.00867628	0.00702072	0.273385	2	**
Irak3	ENSMUSG00000020227	751192	GCTATTTGCTCAGTGCCTTCAGTGA	chr10:120142653-120142677_-	chr10:120142599-120143247_-	-	91605_m6a_chr10:120142599-120143247_-	1.218	1.00498	1.3786	0.123999	0.313297	1.17024	-0.19411	-0.840477	-0.763654	0.00966942	1	0.101761	0.68555	0.953768	1
Irak3	ENSMUSG00000020227	607698	GGGGATGCTATTTGCTCAGTGCCTT	chr10:120142647-120142671_-	chr10:120142599-120143247_-	-	91604_m6a_chr10:120142599-120143247_-	1.7789	2.35574	2.2092	0.668835	1.24395	1.53378	0.0896409	0.300933	-0.192274	6.05079e-05	0.285041	0.0116195	0.115981	0.397049	0
Irak3	ENSMUSG00000020227	693120	TTTCACGGGGATGCTATTTGCTCAG	chr10:120142641-120142665_-	chr10:120142599-120143247_-	-	91603_m6a_chr10:120142599-120143247_-	1.82604	3.05257	2.73912	1.38462	1.27628	1.2552	-0.17501	0.191225	0.0750419	2.04016e-07	0.106682	0.0262952	0.00231142	0.477675	1
Irak3	ENSMUSG00000020227	800075	GTGTCTTTTCACGGGGATGCTATTT	chr10:120142635-120142659_-	chr10:120142599-120143247_-	-	91602_m6a_chr10:120142599-120143247_-	1.0151	2.03536	1.70899	-0.00955057	0.937375	1.51767	-0.555402	0.000530295	-0.549791	0.0498009	1	0.0950222	0.423535	0.916246	0
Irak3	ENSMUSG00000020227	445815	GAGCTCGTGTCTTTTCACGGGGATG	chr10:120142629-120142653_-	chr10:120142599-120143247_-	-	91601_m6a_chr10:120142599-120143247_-	2.59561	2.50036	1.87714	2.75809	1.87036	1.57084	0.741225	0.684653	-0.101349	0.00769555	0.0652674	0.0138498	0.031651	0.132064	1
Irak3	ENSMUSG00000020227	824878	AGCTCAGAGCTCGTGTCTTTTCACG	chr10:120142623-120142647_-	chr10:120142599-120143247_-	-	91600_m6a_chr10:120142599-120143247_-	0.915723	2.05426	1.47573	0.76235	0.234061		-0.837811	-2.24118	0.705346	0.050318	1	0.139751	0.720737	0.780335	0
Irak3	ENSMUSG00000020227	357766	TCACGGAGCTCAGAGCTCGTGTCTT	chr10:120142617-120142641_-	chr10:120142599-120143247_-	-	91599_m6a_chr10:120142599-120143247_-	1.79424	1.82534	0.679454	2.30027	1.77193	1.34691	0.759307	-0.271827	-0.100834	0.163378	0.0334864	0.184267	0.0292906	0.386374	0
Irak3	ENSMUSG00000020227	635200	CTGTACTCACGGAGCTCAGAGCTCG	chr10:120142611-120142635_-	chr10:120142599-120143247_-	-	91598_m6a_chr10:120142599-120143247_-	1.80108	1.37797	1.68478	1.28591	1.2801	0.759376	0.141926	1.35235		0.978921	1	0.0193747	0.0773004	0.221726	0
Irak3	ENSMUSG00000020227	558116	CCTTGGCTGTACTCACGGAGCTCAG	chr10:120142605-120142629_-	chr10:120142599-120143247_-	-	91597_m6a_chr10:120142599-120143247_-	2.03742	1.83411	1.80486	0.682994	1.25423	1.35543	-0.188924	0.0562348	0.543155	0.0316227	0.913313	0.00331886	0.105645	0.325603	0
Irak3	ENSMUSG00000020227	320524	TTGGTCCCTTGGCTGTACTCACGGA	chr10:120142599-120142623_-	chr10:120142599-120143247_-	-	91596_m6a_chr10:120142599-120143247_-	1.97171	1.19703	1.49634	0.797668	1.17334	1.89826	0.184303	0.108557	0.081582	0.242994	0.684272	0.0662869	0.109297	0.0405928	0
Cited2	ENSMUSG00000039910	702826	GTCGCCCACCAGAGCGCACCCCACT	chr10:17723871-17723895_+	chr10:17723870-17724849_+	+	53345_m6a_chr10:17723870-17724849_+	0.0618265	0.61936	0.379595	-0.638289	-0.105933	-0.402715	0.163825	-0.589209	-0.298494	1	1	0.943313	0.978948	0.720779	0
Cited2	ENSMUSG00000039910	469605	ACACGTGTCGCCCACCAGAGCGCAC	chr10:17723877-17723901_+	chr10:17723870-17724849_+	+	53344_m6a_chr10:17723870-17724849_+	0.245376	0.0485274	-0.16349	-0.359966	0.00809252	-0.129223	-0.338737	-0.453392	-0.35134	1	1	0.987989	0.978796	0.992471	0
Cited2	ENSMUSG00000039910	436784	CGCGCCACACGTGTCGCCCACCAGA	chr10:17723883-17723907_+	chr10:17723870-17724849_+	+	53343_m6a_chr10:17723870-17724849_+	1.27851	1.75108	1.16483	0.853323	0.474931	0.219976	-0.0508078	-0.0560896	0.552156	0.394094	1	0.0387385	0.224594	0.180541	0
Cited2	ENSMUSG00000039910	43386	GAGACCCGCGCCACACGTGTCGCCC	chr10:17723889-17723913_+	chr10:17723870-17724849_+	+	53342_m6a_chr10:17723870-17724849_+	-0.534403	-1.55617	-1.08018	-1.00899	-0.719493	-0.83438	-1.03582	-2.30436	-0.762668	1	1	0.987715	0.997553	0.942661	0
Cited2	ENSMUSG00000039910	91281	GACGCTGAGACCCGCGCCACACGTG	chr10:17723895-17723919_+	chr10:17723870-17724849_+	+	53341_m6a_chr10:17723870-17724849_+	-0.179297	-0.759642	-0.535522	-1.01205	-0.220769	-0.360884	-0.386986	-1.26468	-0.550337	1	1	0.991545	0.965234	0.930519	0
Cited2	ENSMUSG00000039910	788427	CGAGCAGACGCTGAGACCCGCGCCA	chr10:17723901-17723925_+	chr10:17723870-17724849_+	+	53340_m6a_chr10:17723870-17724849_+	-0.785236	-0.945911	-1.68927	-1.21425	-1.05514	-0.452706	-0.492633	-1.33685	-1.6199	1	1	0.989921	0.983671	0.955745	0
Cited2	ENSMUSG00000039910	187448	GCGAAACGAGCAGACGCTGAGACCC	chr10:17723907-17723931_+	chr10:17723870-17724849_+	+	53339_m6a_chr10:17723870-17724849_+	0.609048		-0.756297	-1.18729	0.164678	-0.587043	0.0334776	-0.766837		1	1	0.787326	0.923453	0.693263	0
Cited2	ENSMUSG00000039910	116747	CTGAAAGCGAAACGAGCAGACGCTG	chr10:17723913-17723937_+	chr10:17723870-17724849_+	+	53338_m6a_chr10:17723870-17724849_+					1.19373	1.15507		1.38353		1	1	1	0.00741106	1	0
Cited2	ENSMUSG00000039910	687788	CCAGTCCTGAAAGCGAAACGAGCAG	chr10:17723919-17723943_+	chr10:17723870-17724849_+	+	53337_m6a_chr10:17723870-17724849_+	-1.29496		0.613755	0.644927	-0.13708	2.87805	0.6072		1.1326	1	1	0.777033	0.238416	0.085142	0
Cited2	ENSMUSG00000039910	614828	CCATTTCCAGTCCTGAAAGCGAAAC	chr10:17723925-17723949_+	chr10:17723870-17724849_+	+	53336_m6a_chr10:17723870-17724849_+	0.825568		-1.56186	-0.454788	-0.300766	1.27422	-0.355682			1	1	0.745374	0.607185	1	0
Cited2	ENSMUSG00000039910	744618	GGTCTGCCATTTCCAGTCCTGAAAG	chr10:17723931-17723955_+	chr10:17723870-17724849_+	+	53335_m6a_chr10:17723870-17724849_+	0.754236	1.10945	0.985488	0.166258	-0.0909411	0.154981	-0.527567	-0.0110846	-0.364715	1	1	0.133786	0.957068	0.850928	0
Cited2	ENSMUSG00000039910	97081	TCATATGGTCTGCCATTTCCAGTCC	chr10:17723937-17723961_+	chr10:17723870-17724849_+	+	53334_m6a_chr10:17723870-17724849_+	1.75031	1.79733	1.46228	0.553546	1.10616	1.01606	-0.146611	-0.467588	0.185685	0.290677	1	0.00695625	0.042698	0.599473	1
Cited2	ENSMUSG00000039910	727331	TGGCCATCATATGGTCTGCCATTTC	chr10:17723943-17723967_+	chr10:17723870-17724849_+	+	53333_m6a_chr10:17723870-17724849_+	0.668924	1.74482	1.80169	-0.0928348	0.243397	0.161013	-0.6718	0.355761	0.286419	0.102676	1	0.118845	0.929697	0.417115	0
Cited2	ENSMUSG00000039910	734787	GGTTCATGGCCATCATATGGTCTGC	chr10:17723949-17723973_+	chr10:17723870-17724849_+	+	53332_m6a_chr10:17723870-17724849_+	1.14656	1.72519	1.47777	0.464764	0.885165	0.478515	0.334809	0.226935	0.121876	0.00797906	1	0.0295559	0.097231	0.0178491	0
Cited2	ENSMUSG00000039910	352047	GCCCGTGGTTCATGGCCATCATATG	chr10:17723955-17723979_+	chr10:17723870-17724849_+	+	53331_m6a_chr10:17723870-17724849_+	1.73182	0.603919	0.997772	0.251306	0.961008	0.933866	0.197663	-0.942	-0.46519	0.0940421	0.849382	0.217654	0.125565	0.779147	0
Cited2	ENSMUSG00000039910	821913	GGAAGCGCCCGTGGTTCATGGCCAT	chr10:17723961-17723985_+	chr10:17723870-17724849_+	+	53330_m6a_chr10:17723870-17724849_+	1.55323	1.15964	1.3673	0.721867	0.679822	0.359218	0.0653752	0.105359	0.135725	0.0358125	1	0.0188552	0.0841478	0.00560132	0
Cited2	ENSMUSG00000039910	896743	CGTCGGGGAAGCGCCCGTGGTTCAT	chr10:17723967-17723991_+	chr10:17723870-17724849_+	+	53329_m6a_chr10:17723870-17724849_+	0.218758	0.587671	0.796615	-0.552721	-0.315005	-0.0118983	-0.911243	-0.660949	-0.832381	1	1	0.866225	0.972349	0.994714	0
Cited2	ENSMUSG00000039910	851350	TGGTGCCGTCGGGGAAGCGCCCGTG	chr10:17723973-17723997_+	chr10:17723870-17724849_+	+	53328_m6a_chr10:17723870-17724849_+	-0.146128	1.25265	1.30164	-0.151537	-0.466798	-0.221109	-1.13434	-0.0679155	-0.200089	0.563603	1	0.491543	0.988662	0.811865	0
Cited2	ENSMUSG00000039910	931043	GCCCGTTGGTGCCGTCGGGGAAGCG	chr10:17723979-17724003_+	chr10:17723870-17724849_+	+	53327_m6a_chr10:17723870-17724849_+	-0.671114	0.581028	0.861103	-0.494552	-1.35425	-0.434358	-1.64809	-0.191908	-0.571405	1	1	0.812857	0.967376	0.878624	0
Cited2	ENSMUSG00000039910	151297	GGTGCAGCCCGTTGGTGCCGTCGGG	chr10:17723985-17724009_+	chr10:17723870-17724849_+	+	53326_m6a_chr10:17723870-17724849_+	1.80866	0.753404	0.558784	0.577609	0.836762	0.924291	0.0774775	-0.518935	-0.928412	0.102442	0.588878	0.293564	0.0263604	0.83259	0
Cited2	ENSMUSG00000039910	434506	GGTGGTGGTGCAGCCCGTTGGTGCC	chr10:17723991-17724015_+	chr10:17723870-17724849_+	+	53325_m6a_chr10:17723870-17724849_+	1.55996	1.67609	1.43669	0.443678	0.904756	0.871123	-0.0343868	-0.0680272	0.112549	8.93806e-05	0.487048	0.00401991	0.0583368	0.119327	0
Cited2	ENSMUSG00000039910	634537	GGGCAGGGTGGTGGTGCAGCCCGTT	chr10:17723997-17724021_+	chr10:17723870-17724849_+	+	53324_m6a_chr10:17723870-17724849_+	0.158458	0.928261	0.0388539	-0.431263	-0.434796	0.155979	-0.175464	-0.158402	-0.0392988	1	1	0.863045	0.951137	0.75385	0
Cited2	ENSMUSG00000039910	936914	TGCGGTGGGCAGGGTGGTGGTGCAG	chr10:17724003-17724027_+	chr10:17723870-17724849_+	+	53323_m6a_chr10:17723870-17724849_+	-0.68881	0.809749	0.674713	-0.185579	-0.938358	-0.269629	-0.863228	-0.0579612	-0.239549	1	1	0.806866	0.961585	0.827047	0
Cited2	ENSMUSG00000039910	298850	TGCCCATGCGGTGGGCAGGGTGGTG	chr10:17724009-17724033_+	chr10:17723870-17724849_+	+	53322_m6a_chr10:17723870-17724849_+	1.40995	1.6127	2.01932	-1.0622	0.817874	0.828089	0.328972	-0.301677	0.165057	4.42996e-10	1	0.0191367	0.583095	0.251756	0
Cited2	ENSMUSG00000039910	4218	GCCCCATGCCCATGCGGTGGGCAGG	chr10:17724015-17724039_+	chr10:17723870-17724849_+	+	53321_m6a_chr10:17723870-17724849_+	0.703691	0.286758	0.314805	0.25551	0.550852	0.578292	0.306746	-0.508502	-0.984188	1	1	0.941042	0.18718	0.749302	0
Cited2	ENSMUSG00000039910	153319	GGAACTGCCCCATGCCCATGCGGTG	chr10:17724021-17724045_+	chr10:17723870-17724849_+	+	53320_m6a_chr10:17723870-17724849_+	0.618203	-0.0581223	0.372014	0.126464	0.577376	0.254852	0.0696992	-0.233855	-0.381049	1	1	0.932241	0.564814	0.722086	0
Cited2	ENSMUSG00000039910	734836	GGCTCGGGAACTGCCCCATGCCCAT	chr10:17724027-17724051_+	chr10:17723870-17724849_+	+	53319_m6a_chr10:17723870-17724849_+	0.631272	0.904594	0.632791	0.0590599	0.561679	0.194044	0.315554	0.113235	-0.134805	0.414688	1	0.735174	0.662056	0.144056	0
Cited2	ENSMUSG00000039910	272505	GATGCGGGCTCGGGAACTGCCCCAT	chr10:17724033-17724057_+	chr10:17723870-17724849_+	+	53318_m6a_chr10:17723870-17724849_+	1.48336	1.27091	1.10492	0.581739	0.884603	0.904675	0.254567	-0.158859	0.236544	0.00014296	0.214597	0.0228116	0.0253624	0.138689	1
Cited2	ENSMUSG00000039910	481212	GGTGATGATGCGGGCTCGGGAACTG	chr10:17724039-17724063_+	chr10:17723870-17724849_+	+	53317_m6a_chr10:17723870-17724849_+	1.75794	1.65238	1.41657	1.70708	1.14368	0.857202	0.778429	0.443395	0.158567	0.000216527	0.0835408	0.00744643	0.035117	0.0460297	0
Cited2	ENSMUSG00000039910	657365	GCTGCTGGTGATGATGCGGGCTCGG	chr10:17724045-17724069_+	chr10:17723870-17724849_+	+	53316_m6a_chr10:17723870-17724849_+	1.40269	1.12437	1.36395	0.461318	0.37407	0.64347	-0.137086	0.0791077	0.160247	7.65399e-07	0.729169	0.0141874	0.101022	0.15032	0
Cited2	ENSMUSG00000039910	39370	GCTGCTGCTGCTGGTGATGATGCGG	chr10:17724051-17724075_+	chr10:17723870-17724849_+	+	53315_m6a_chr10:17723870-17724849_+	0.0988014	-0.0492375	-0.447021	0.177648	0.670744	0.475035	0.14153	-0.112164	-0.388188	1	1	0.985131	0.284591	0.570732	0
Cited2	ENSMUSG00000039910	666046	GCTGGGGCTGCTGCTGCTGGTGATG	chr10:17724057-17724081_+	chr10:17723870-17724849_+	+	53314_m6a_chr10:17723870-17724849_+	0.0138614	-0.281857	-0.122127	-0.17979	0.0485255	0.172988	-0.104301	-0.0199044	-0.340973	1	1	0.995754	0.957306	0.719403	0
Cited2	ENSMUSG00000039910	365997	AGGCGTGCTGGGGCTGCTGCTGCTG	chr10:17724063-17724087_+	chr10:17723870-17724849_+	+	53313_m6a_chr10:17723870-17724849_+	0.43248	0.0602551	-0.308144	0.325321	0.377358	0.797091	0.363863	-0.0310442	-0.222414	1	0.861401	0.961928	0.203474	0.27139	0
Cited2	ENSMUSG00000039910	178321	CGTTGAAGGCGTGCTGGGGCTGCTG	chr10:17724069-17724093_+	chr10:17723870-17724849_+	+	53312_m6a_chr10:17723870-17724849_+	1.0301	0.509277	0.87538	0.0312708	0.677256	0.744907	0.186468	0.174129	0.462907	0.120108	1	0.469032	0.300318	0.0306229	0
Cited2	ENSMUSG00000039910	158626	TGAGGGCGTTGAAGGCGTGCTGGGG	chr10:17724075-17724099_+	chr10:17723870-17724849_+	+	53311_m6a_chr10:17723870-17724849_+	1.47711	1.06772	0.698748	0.569312	0.950539	0.911791	0.203693	0.545042	-0.000711243	0.302078	1	0.163144	0.0306845	0.083845	0
Cited2	ENSMUSG00000039910	693087	CGCCCATGAGGGCGTTGAAGGCGTG	chr10:17724081-17724105_+	chr10:17723870-17724849_+	+	53310_m6a_chr10:17723870-17724849_+	0.89211	0.182482	2.05912	-0.0518057	0.112503	1.05069	-0.403248	-0.378203	0.151521	0.0692343	1	0.344481	0.473167	0.714191	0
Cited2	ENSMUSG00000039910	758681	TGTGCTCGCCCATGAGGGCGTTGAA	chr10:17724087-17724111_+	chr10:17723870-17724849_+	+	53309_m6a_chr10:17723870-17724849_+	0.639922	-0.683232	1.03352		-0.00609604	0.657991	-0.630893	-1.19846	1.27045	1	1	0.765975	0.517635	0.546028	0
Cited2	ENSMUSG00000039910	637911	AGTGTATGTGCTCGCCCATGAGGGC	chr10:17724093-17724117_+	chr10:17723870-17724849_+	+	53308_m6a_chr10:17723870-17724849_+	1.29079	1.67641	1.49997	0.113322	0.438116	0.911376	0.0649943	0.432835	-0.215887	0.00229893	1	0.0122909	0.299727	0.216679	0
Cited2	ENSMUSG00000039910	751157	CGCCGTAGTGTATGTGCTCGCCCAT	chr10:17724099-17724123_+	chr10:17723870-17724849_+	+	53307_m6a_chr10:17723870-17724849_+	0.926937	0.838455	0.214683	-0.348747	-0.245438	0.5992	-0.297664	-1.03369	-1.1973	0.552975	1	0.691403	0.814019	0.943827	0
Cited2	ENSMUSG00000039910	244480	TGCCCGCGCCGTAGTGTATGTGCTC	chr10:17724105-17724129_+	chr10:17723870-17724849_+	+	53306_m6a_chr10:17723870-17724849_+	1.56588	1.03341	1.10373	0.690375	0.715296	0.623934	-0.063942	-0.196626	-0.0889086	0.000308013	0.342043	0.0587956	0.00333531	0.717398	0
Cited2	ENSMUSG00000039910	219055	TCATGTTGCCCGCGCCGTAGTGTAT	chr10:17724111-17724135_+	chr10:17723870-17724849_+	+	53305_m6a_chr10:17723870-17724849_+	1.30847	0.00223851	0.943531	-0.136857	0.603644	0.655803	0.0348108	-0.606666	-0.130609	0.150566	1	0.536207	0.458931	0.735841	0
Cited2	ENSMUSG00000039910	38287	TGGCATTCATGTTGCCCGCGCCGTA	chr10:17724117-17724141_+	chr10:17723870-17724849_+	+	53304_m6a_chr10:17723870-17724849_+	1.23891	0.444047	0.196529	0.0188385	0.563013	0.722952	0.0744378	-0.364983	-0.102306	0.431544	1	0.673822	0.356096	0.61395	0
Cited2	ENSMUSG00000039910	658940	CGCTCGTGGCATTCATGTTGCCCGC	chr10:17724123-17724147_+	chr10:17723870-17724849_+	+	53303_m6a_chr10:17723870-17724849_+	1.39175	1.2037	1.30052	0.134622	0.57858	0.696976	-0.151809	-0.361049	-0.69711	1.83404e-05	0.861216	0.00563039	0.269578	0.906939	0
Cited2	ENSMUSG00000039910	107908	TGATGCCGCTCGTGGCATTCATGTT	chr10:17724129-17724153_+	chr10:17723870-17724849_+	+	53302_m6a_chr10:17723870-17724849_+	1.984	1.67556	1.16087	0.966161	1.2273	0.705785	-0.147615	0.0358445	-0.181769	4.15729e-16	3.38793e-05	0.0384159	0.0269411	0.547668	1
Cited2	ENSMUSG00000039910	303827	CGTGCCTGATGCCGCTCGTGGCATT	chr10:17724135-17724159_+	chr10:17723870-17724849_+	+	53301_m6a_chr10:17723870-17724849_+	1.88643	1.2364	0.867656	1.09017	0.933985	1.34513	0.389003	-0.61525	-0.918493	7.1724e-10	1.72176e-06	0.10607	0.0114336	0.732125	0
Cited2	ENSMUSG00000039910	203956	CCATGGCGTGCCTGATGCCGCTCGT	chr10:17724141-17724165_+	chr10:17723870-17724849_+	+	53300_m6a_chr10:17723870-17724849_+	1.89579	1.59164	1.63829	1.24283	1.05341	0.904282	-0.221567	0.0566706	-0.061577	3.57531e-16	1.14127e-05	0.00523232	0.00894637	0.442481	1
Cited2	ENSMUSG00000039910	38291	CCGGCCCCATGGCGTGCCTGATGCC	chr10:17724147-17724171_+	chr10:17723870-17724849_+	+	53299_m6a_chr10:17723870-17724849_+	1.02909	0.19816	-0.0692175	-0.1817	0.45513	0.701292	0.230916	-0.700671	-0.0691876	0.695725	1	0.827497	0.526109	0.614042	0
Cited2	ENSMUSG00000039910	170463	CAGTCCCCGGCCCCATGGCGTGCCT	chr10:17724153-17724177_+	chr10:17723870-17724849_+	+	53298_m6a_chr10:17723870-17724849_+	0.782365	0.644586	0.463743	1.03553	0.441454	0.1385	0.463227	0.139632	-0.00152266	0.229147	0.728306	0.888589	0.268959	0.0851607	0
Cited2	ENSMUSG00000039910	514299	CGTTCACAGTCCCCGGCCCCATGGC	chr10:17724159-17724183_+	chr10:17723870-17724849_+	+	53297_m6a_chr10:17723870-17724849_+	0.492914	0.26431	0.181921	-0.0100849	0.0732848	0.207225	-0.114647	0.116627	0.0366223	1	1	0.982098	0.971618	0.136457	0
Cited2	ENSMUSG00000039910	438827	GCCCCCCGTTCACAGTCCCCGGCCC	chr10:17724165-17724189_+	chr10:17723870-17724849_+	+	53296_m6a_chr10:17723870-17724849_+	0.625286	0.301752	0.0223454	0.477212	0.409899	0.399722	0.399975	0.00441583	-0.394263	1	0.796029	0.943831	0.0368066	0.363423	0
Cited2	ENSMUSG00000039910	942328	GGGGGTGCCCCCCGTTCACAGTCCC	chr10:17724171-17724195_+	chr10:17723870-17724849_+	+	53295_m6a_chr10:17723870-17724849_+	-0.122754	0.39022	0.14348	-0.495135	-0.439598	0.0546091	-0.646763	0.0903848	-0.106045	1	1	0.976198	0.966225	0.695126	0
Cited2	ENSMUSG00000039910	93226	CGCTCGGGGGGTGCCCCCCGTTCAC	chr10:17724177-17724201_+	chr10:17723870-17724849_+	+	53294_m6a_chr10:17723870-17724849_+	0.547902	-1.26025	-0.16349	-0.252215	0.158791	0.142551	-0.569922	-0.0544485	0.345114	1	1	0.912205	0.932627	0.505861	0
Cited2	ENSMUSG00000039910	516580	CCAGAGCGCTCGGGGGGTGCCCCCC	chr10:17724183-17724207_+	chr10:17723870-17724849_+	+	53293_m6a_chr10:17723870-17724849_+	0.733264	0.631517	0.72813	1.16559	0.319106	0.355363	0.496604	0.364782	0.325724	1	1	0.947336	0.216495	0.00559909	0
Cited2	ENSMUSG00000039910	774726	CCGGGGCCAGAGCGCTCGGGGGGTG	chr10:17724189-17724213_+	chr10:17723870-17724849_+	+	53292_m6a_chr10:17723870-17724849_+	0.304425	1.46378	0.938585	0.372435	-0.662162	-0.549278	-0.321401	0.492812	0.426271	0.515433	1	0.386098	0.901422	0.192489	0
Cited2	ENSMUSG00000039910	847714	TGGCGGCCGGGGCCAGAGCGCTCGG	chr10:17724195-17724219_+	chr10:17723870-17724849_+	+	53291_m6a_chr10:17723870-17724849_+	-0.0362072	0.662017	0.677611	-0.227865	-1.00555	-0.178157	-1.00136	-0.324662	-0.387023	1	1	0.865639	0.953393	0.922451	0
Cited2	ENSMUSG00000039910	848559	TAAACCTGGCGGCCGGGGCCAGAGC	chr10:17724201-17724225_+	chr10:17723870-17724849_+	+	53290_m6a_chr10:17723870-17724849_+	1.09773	1.84029	1.22017	0.160765	0.450774	0.609093	-0.134026	-0.0042594	0.0460825	0.162934	1	0.0612617	0.340429	0.196477	0
Cited2	ENSMUSG00000039910	19166	AGTTGTTAAACCTGGCGGCCGGGGC	chr10:17724207-17724231_+	chr10:17723870-17724849_+	+	53289_m6a_chr10:17723870-17724849_+	1.34928	1.21739	1.14601	0.653449	0.499262	0.858527	0.101543	-0.80986	-0.172807	0.312511	1	0.00867179	0.0442676	0.736551	1
Cited2	ENSMUSG00000039910	552408	ACTGGGAGTTGTTAAACCTGGCGGC	chr10:17724213-17724237_+	chr10:17723870-17724849_+	+	53288_m6a_chr10:17723870-17724849_+	0.707411	-0.544036	0.00767891	-0.359966	0.149447	2.32484	0.0158305	0.507645	0.685719	1	1	0.910128	0.352144	0.0667528	0
Cited2	ENSMUSG00000039910	555570	CCATGAACTGGGAGTTGTTAAACCT	chr10:17724219-17724243_+	chr10:17723870-17724849_+	+	53287_m6a_chr10:17723870-17724849_+	0.685633			1.41235	0.665885	-0.0908731	-0.00759318	1.78089		1	1	1	0.26991	0.236201	0
Cited2	ENSMUSG00000039910	625176	GGGGACCCATGAACTGGGAGTTGTT	chr10:17724225-17724249_+	chr10:17723870-17724849_+	+	53286_m6a_chr10:17723870-17724849_+	1.40722	0.821041	0.8713	0.215309	0.349125	1.08734	-0.0106309	-0.769543	-0.94783	0.752423	1	0.163161	0.263167	0.88401	0
Cited2	ENSMUSG00000039910	647147	CCACCGGGGGACCCATGAACTGGGA	chr10:17724231-17724255_+	chr10:17723870-17724849_+	+	53285_m6a_chr10:17723870-17724849_+	0.777224	1.28556	0.896826	-0.1013	0.257584	0.0319783	-0.359377	-0.228399	-0.0966833	0.967053	1	0.165647	0.94252	0.896355	0
Cited2	ENSMUSG00000039910	140874	GGCTGGCCACCGGGGGACCCATGAA	chr10:17724237-17724261_+	chr10:17723870-17724849_+	+	53284_m6a_chr10:17723870-17724849_+	1.50272	0.835223	1.0018	0.182094	0.910319	0.756011	-0.159163	-0.724436	-0.26968	0.741481	1	0.124885	0.172371	0.885276	0
Cited2	ENSMUSG00000039910	937803	CTCCCTGGCTGGCCACCGGGGGACC	chr10:17724243-17724267_+	chr10:17723870-17724849_+	+	53283_m6a_chr10:17723870-17724849_+	-0.480307	0.523862	0.475739	-0.667972	-1.17616	-0.839505	-1.72725	-0.324245	-0.613711	1	1	0.900391	0.992897	0.898792	0
Cited2	ENSMUSG00000039910	305682	GGGAGCCTCCCTGGCTGGCCACCGG	chr10:17724249-17724273_+	chr10:17723870-17724849_+	+	53282_m6a_chr10:17723870-17724849_+	0.734516	-0.228545	-0.368465	-0.0332581	-0.204853	0.615425	0.273146	-0.544447	-1.00592	1	1	0.917753	0.763099	0.768713	0
Cited2	ENSMUSG00000039910	347909	CCGGCAGGGAGCCTCCCTGGCTGGC	chr10:17724255-17724279_+	chr10:17723870-17724849_+	+	53281_m6a_chr10:17723870-17724849_+	1.38757	1.7827	1.21998	1.11847	0.580381	0.422197	0.69787	0.312878	0.260485	0.355178	1	0.0282214	0.113704	0.0326947	0
Cited2	ENSMUSG00000039910	834838	TGCTGGCCGGCAGGGAGCCTCCCTG	chr10:17724261-17724285_+	chr10:17723870-17724849_+	+	53280_m6a_chr10:17723870-17724849_+	0.306166	1.12883	0.229381	-0.16961	-0.0346199	-0.31504	-0.719262	-0.353763	0.0020512	1	1	0.751216	0.98819	0.836737	0
Cited2	ENSMUSG00000039910	119640	GCTGCATGCTGGCCGGCAGGGAGCC	chr10:17724267-17724291_+	chr10:17723870-17724849_+	+	53279_m6a_chr10:17723870-17724849_+	1.81868	0.910682	1.76137	0.28344	0.996308	0.677831	0.0343652	-0.362308	0.114708	0.0298682	1	0.0690759	0.136807	0.45791	0
Cited2	ENSMUSG00000039910	257423	TCTGCAGCTGCATGCTGGCCGGCAG	chr10:17724273-17724297_+	chr10:17723870-17724849_+	+	53278_m6a_chr10:17723870-17724849_+	1.66612	1.86837	1.25004	1.60328	1.36915	0.883568	0.546363	0.298908	0.565044	0.0586637	0.523056	0.02384	0.0235866	0.0113785	0
Cited2	ENSMUSG00000039910	338646	TGAGCTTCTGCAGCTGCATGCTGGC	chr10:17724279-17724303_+	chr10:17723870-17724849_+	+	53277_m6a_chr10:17723870-17724849_+	1.68714	0.951218	1.72027	0.920504	0.937897	1.14141	-0.0896438	0.161211	0.150494	0.114721	0.871516	0.0594276	0.00574965	0.0926431	0
Cited2	ENSMUSG00000039910	91989	GGTTGTTGAGCTTCTGCAGCTGCAT	chr10:17724285-17724309_+	chr10:17723870-17724849_+	+	53276_m6a_chr10:17723870-17724849_+	1.33788	1.37416	1.49463	0.838557	0.941157	0.934067	-0.0452208	0.135489	0.229739	0.124481	0.987954	0.00298059	0.0017344	0.0682304	1
Cited2	ENSMUSG00000039910	286771	AATACTGGTTGTTGAGCTTCTGCAG	chr10:17724291-17724315_+	chr10:17723870-17724849_+	+	53275_m6a_chr10:17723870-17724849_+	0.849302	0.875285	1.36723	0.959215	0.645469	0.831475	0.386629	-0.677313	0.828149	0.654962	1	0.145728	0.0179514	0.304858	0
Cited2	ENSMUSG00000039910	467992	GGTTGAAATACTGGTTGTTGAGCTT	chr10:17724297-17724321_+	chr10:17723870-17724849_+	+	53274_m6a_chr10:17723870-17724849_+	0.686469		1.16022		0.379975		-0.037326		-0.927346	1	1	0.338197	1	0.730527	0
Cited2	ENSMUSG00000039910	542741	GGTGATGGTTGAAATACTGGTTGTT	chr10:17724303-17724327_+	chr10:17723870-17724849_+	+	53273_m6a_chr10:17723870-17724849_+	0.388061	0.61604		0.831455	0.934441	0.348788	0.822187	1.34095	0.793645	1	1	0.880532	0.0919418	0.0131676	0
Cited2	ENSMUSG00000039910	928215	GGTAGGGGTGATGGTTGAAATACTG	chr10:17724309-17724333_+	chr10:17723870-17724849_+	+	53272_m6a_chr10:17723870-17724849_+	-0.163705	0.900686	1.51396	1.62374	-0.449353	-1.549	-0.158162	0.605166	-1.10676	1	1	0.529564	0.667989	0.592094	0
Cited2	ENSMUSG00000039910	206803	TGTGGGGGTAGGGGTGATGGTTGAA	chr10:17724315-17724339_+	chr10:17723870-17724849_+	+	53271_m6a_chr10:17723870-17724849_+	0.816208	0.839504	0.870571	0.360446	0.362999	0.176301	0.217651	0.213727	0.261474	1	1	0.0421733	0.726617	0.00114216	0
Cited2	ENSMUSG00000039910	339700	AGTGGTTGTGGGGGTAGGGGTGATG	chr10:17724321-17724345_+	chr10:17723870-17724849_+	+	53270_m6a_chr10:17723870-17724849_+	0.923211	0.683531	0.883416	-0.0865615	0.464015	0.458962	0.30162	0.578552	0.633584	1	1	0.326959	0.622974	0.0143463	0
Cited2	ENSMUSG00000039910	169402	GCATGTAGTGGTTGTGGGGGTAGGG	chr10:17724327-17724351_+	chr10:17723870-17724849_+	+	53269_m6a_chr10:17723870-17724849_+	0.701569	0.908002	0.575551	0.249098	0.504094	0.625962	0.171308	0.437568	0.609962	1	1	0.70883	0.203973	0.0302409	0
Cited2	ENSMUSG00000039910	500944	AATCCGGCATGTAGTGGTTGTGGGG	chr10:17724333-17724357_+	chr10:17723870-17724849_+	+	53268_m6a_chr10:17723870-17724849_+	1.5434	0.992767	0.798487	1.02716	0.567401	0.954944	0.23954	-0.860998	-1.08486	0.214349	0.77846	0.143849	0.0356626	0.819198	0
Cited2	ENSMUSG00000039910	314646	GGTGCAAATCCGGCATGTAGTGGTT	chr10:17724339-17724363_+	chr10:17723870-17724849_+	+	53267_m6a_chr10:17723870-17724849_+	1.78296	0.764265	1.03986	0.780218	0.919005	1.17254	0.122121	-0.667648	-0.971048	0.154263	0.582441	0.157586	0.0166857	0.83543	0
Cited2	ENSMUSG00000039910	167778	CAGTGGGGTGCAAATCCGGCATGTA	chr10:17724345-17724369_+	chr10:17723870-17724849_+	+	53266_m6a_chr10:17723870-17724849_+	1.35917	0.960771	1.05773	0.503793	1.14714	0.792483	0.03733	-0.261548	-0.207695	0.202657	0.850975	0.0540613	0.0636849	0.695559	0
Cited2	ENSMUSG00000039910	370856	GGCCTGCAGTGGGGTGCAAATCCGG	chr10:17724351-17724375_+	chr10:17723870-17724849_+	+	53265_m6a_chr10:17723870-17724849_+	2.05429	1.59717	1.61489	1.20998	1.2077	0.904543	0.604731	0.310075	0.0711948	0.00841024	0.709169	0.0116074	0.00860823	0.056907	1
Cited2	ENSMUSG00000039910	419171	TCTGGTGGCCTGCAGTGGGGTGCAA	chr10:17724357-17724381_+	chr10:17723870-17724849_+	+	53264_m6a_chr10:17723870-17724849_+	2.04141	1.79419	1.67562	1.7867	1.279	1.24538	0.780338	0.224928	-0.106014	0.000643188	0.062268	0.00522554	0.0123665	0.135948	2	**
Cited2	ENSMUSG00000039910	657084	CGTTCATCTGGTGGCCTGCAGTGGG	chr10:17724363-17724387_+	chr10:17723870-17724849_+	+	53263_m6a_chr10:17723870-17724849_+	1.11007	0.687646	0.400348	0.270153	0.116404	0.697046	-0.137181	-0.269564	-0.70917	0.440172	1	0.598677	0.465804	0.878521	1
Cited2	ENSMUSG00000039910	368921	TTGTCCCGTTCATCTGGTGGCCTGC	chr10:17724369-17724393_+	chr10:17723870-17724849_+	+	53262_m6a_chr10:17723870-17724849_+	1.71777	1.47056	1.18522	0.973256	0.933719	0.945284	0.12624	0.174686	0.16332	6.85659e-05	0.120712	0.024691	0.000187194	0.00179534	0
Cited2	ENSMUSG00000039910	805507	GCTGGTTTGTCCCGTTCATCTGGTG	chr10:17724375-17724399_+	chr10:17723870-17724849_+	+	53261_m6a_chr10:17723870-17724849_+	0.274402	1.01019	0.981147	0.0300967	-0.0589428	-0.123871	-0.570903	0.0774064	0.0769227	0.259369	1	0.552788	0.993746	0.581015	0
Cited2	ENSMUSG00000039910	455275	GGAAGTGCTGGTTTGTCCCGTTCAT	chr10:17724381-17724405_+	chr10:17723870-17724849_+	+	53260_m6a_chr10:17723870-17724849_+	1.66881	0.956778	1.34469	0.559389	0.844197	0.905597	0.30791	0.134114	-0.0278571	4.48715e-05	0.255547	0.0613505	0.0287489	0.0721337	0
Cited2	ENSMUSG00000039910	495121	AATCTCGGAAGTGCTGGTTTGTCCC	chr10:17724387-17724411_+	chr10:17723870-17724849_+	+	53259_m6a_chr10:17723870-17724849_+	1.75297	1.74333	1.51867	1.00593	1.1924	1.01079	0.795688	0.0898895	0.163775	6.29091e-07	0.0803051	0.00373807	0.00354054	0.0946876	1
Cited2	ENSMUSG00000039910	473108	GGTTGCAATCTCGGAAGTGCTGGTT	chr10:17724393-17724417_+	chr10:17723870-17724849_+	+	53258_m6a_chr10:17723870-17724849_+	1.65918	1.49379	1.32692	0.487914	0.934119	0.714308	0.398627	0.286338	0.1964	6.14457e-14	0.175073	0.0090821	0.0519576	0.0113002	0
Cited2	ENSMUSG00000039910	501597	GCTTGGGGTTGCAATCTCGGAAGTG	chr10:17724399-17724423_+	chr10:17723870-17724849_+	+	53257_m6a_chr10:17723870-17724849_+	1.58175	1.31178	1.34161	0.400048	0.959065	0.925943	0.238968	0.281915	-0.06683	9.34519e-14	0.00848604	0.00922569	0.0738335	0.0801723	0
Cited2	ENSMUSG00000039910	59372	CGCTGTGCTTGGGGTTGCAATCTCG	chr10:17724405-17724429_+	chr10:17723870-17724849_+	+	53256_m6a_chr10:17723870-17724849_+	1.52098	0.848817	1.26412	0.566621	1.0184	1.01837	0.210665	-0.133724	0.12487	3.62056e-06	0.012573	0.0825947	0.0368648	0.135418	0
Cited2	ENSMUSG00000039910	459589	TGCCTCCGCTGTGCTTGGGGTTGCA	chr10:17724411-17724435_+	chr10:17723870-17724849_+	+	53255_m6a_chr10:17723870-17724849_+	0.676561	0.572615	0.374215	0.524564	0.555475	0.155964	0.313231	0.217521	0.0182191	1	1	0.946995	0.325384	0.0444354	0
Cited2	ENSMUSG00000039910	224422	TGCTGCTGCCTCCGCTGTGCTTGGG	chr10:17724417-17724441_+	chr10:17723870-17724849_+	+	53254_m6a_chr10:17723870-17724849_+	0.500645	0.00801374	0.346804	-0.0254445	0.354595	0.266135	0.110581	-0.239828	0.214249	1	1	0.96319	0.83423	0.24201	0
Cited2	ENSMUSG00000039910	766462	CAGGGGTGCTGCTGCCTCCGCTGTG	chr10:17724423-17724447_+	chr10:17723870-17724849_+	+	53253_m6a_chr10:17723870-17724849_+	-0.318477	0.249383	0.514511	-0.159406	-0.324634	-0.335574	-0.322825	0.171659	0.1049	1	1	0.939865	0.995796	0.3414	0
Cited2	ENSMUSG00000039910	801224	CACCGCCAGGGGTGCTGCTGCCTCC	chr10:17724429-17724453_+	chr10:17723870-17724849_+	+	53252_m6a_chr10:17723870-17724849_+	-0.141153	0.624494	0.226476	-0.147438	-0.681145	-0.383974	-0.768258	-0.126999	-0.0888058	1	1	0.935586	0.979995	0.80451	0
Cited2	ENSMUSG00000039910	369729	CACCCGCACCGCCAGGGGTGCTGCT	chr10:17724435-17724459_+	chr10:17723870-17724849_+	+	53251_m6a_chr10:17723870-17724849_+	1.45292	0.0173561	0.967728	0.307435	0.34557	1.04073	0.104956	-0.557167	-1.03932	0.314404	1	0.482149	0.226516	0.828361	0
Cited2	ENSMUSG00000039910	369330	CGCTGCCACCCGCACCGCCAGGGGT	chr10:17724441-17724465_+	chr10:17723870-17724849_+	+	53250_m6a_chr10:17723870-17724849_+	1.63539	1.09625	1.18401	1.51183	0.799232	0.771692	0.632507	0.314089	-0.0017673	0.182112	0.822536	0.0456975	0.0530445	0.0791552	0
Cited2	ENSMUSG00000039910	814079	GGGTGCCGCTGCCACCCGCACCGCC	chr10:17724447-17724471_+	chr10:17723870-17724849_+	+	53249_m6a_chr10:17723870-17724849_+	-0.803251	0.238029	-0.0806866	-0.582669	-1.06049	-0.935481	-1.31944	-0.374915	-0.412073	1	1	0.958877	0.993085	0.907312	0
Cited2	ENSMUSG00000039910	549484	CGCCGGGGGTGCCGCTGCCACCCGC	chr10:17724453-17724477_+	chr10:17723870-17724849_+	+	53248_m6a_chr10:17723870-17724849_+	0.756448	0.420869	0.686721	-0.363018	-0.0321827	0.0672561	-0.259468	-0.129962	-0.403875	0.999848	1	0.880893	0.963367	0.921782	0
Cited2	ENSMUSG00000039910	708109	CGGAGCCGCCGGGGGTGCCGCTGCC	chr10:17724459-17724483_+	chr10:17723870-17724849_+	+	53247_m6a_chr10:17723870-17724849_+	0.748254	0.87013	0.811752	0.0746319	0.269901	0.148168	0.19433	0.0594794	-0.282865	0.491254	1	0.324325	0.956466	0.316972	0
Cited2	ENSMUSG00000039910	933156	TGCCGCCGGAGCCGCCGGGGGTGCC	chr10:17724465-17724489_+	chr10:17723870-17724849_+	+	53246_m6a_chr10:17723870-17724849_+	-1.68041	-0.434359	-0.108324	-0.996466	-1.6428	-1.29261	-1.62683	-0.271444	-0.411871	1	1	0.957306	0.993749	0.872917	0
Cited2	ENSMUSG00000039910	396009	CCGAGGTGCCGCCGGAGCCGCCGGG	chr10:17724471-17724495_+	chr10:17723870-17724849_+	+	53245_m6a_chr10:17723870-17724849_+	0.596793	0.325474	0.188238	0.860224	0.169029	0.158452	0.447311	0.138396	-0.205583	1	1	0.963751	0.422467	0.185818	0
Cited2	ENSMUSG00000039910	47179	CGCCGCCCGAGGTGCCGCCGGAGCC	chr10:17724477-17724501_+	chr10:17723870-17724849_+	+	53244_m6a_chr10:17723870-17724849_+	0.142319	-0.36128	-0.44689	-0.227963	0.0079575	0.0131792	-0.134069	-0.642692	-0.142212	1	1	0.984319	0.982457	0.837509	0
Cited2	ENSMUSG00000039910	259927	CACCCGCGCCGCCCGAGGTGCCGCC	chr10:17724483-17724507_+	chr10:17723870-17724849_+	+	53243_m6a_chr10:17723870-17724849_+	0.282477	-0.285743	-0.140656	-0.337321	-0.137572	-0.0679679	-0.192943	-0.663567	-0.24553	1	1	0.980574	0.988595	0.89892	0
Cited2	ENSMUSG00000039910	382278	TGCTGCCACCCGCGCCGCCCGAGGT	chr10:17724489-17724513_+	chr10:17723870-17724849_+	+	53242_m6a_chr10:17723870-17724849_+	0.508605	-0.280982	0.0939785	-0.663433	0.220246	0.0834717	0.0989885	-0.616926	-0.227101	1	1	0.952276	0.88351	0.73945	0
Cited2	ENSMUSG00000039910	17604	CCGCGCTGCTGCCACCCGCGCCGCC	chr10:17724495-17724519_+	chr10:17723870-17724849_+	+	53241_m6a_chr10:17723870-17724849_+	0.370644	-0.221127	-0.372854	0.245809	0.314751	0.139222	0.292062	-0.55042	-0.300083	1	1	0.968858	0.919237	0.632969	0
Cited2	ENSMUSG00000039910	696539	TGCCGCCCGCGCTGCTGCCACCCGC	chr10:17724501-17724525_+	chr10:17723870-17724849_+	+	53240_m6a_chr10:17723870-17724849_+	-0.242208	0.106566	-0.054321	-0.900538	-0.554623	-0.546522	-0.54462	-0.487557	-0.192632	1	1	0.993189	0.993478	0.950292	0
Cited2	ENSMUSG00000039910	75617	CGCCGCTGCCGCCCGCGCTGCTGCC	chr10:17724507-17724531_+	chr10:17723870-17724849_+	+	53239_m6a_chr10:17723870-17724849_+	0.0379658	-0.577199	-0.372611	-0.225986	0.219688	-0.0788486	-0.237008	-0.50464	-0.092924	1	1	0.986899	0.947674	0.871608	0
Cited2	ENSMUSG00000039910	259331	TGCCACCGCCGCTGCCGCCCGCGCT	chr10:17724513-17724537_+	chr10:17723870-17724849_+	+	53238_m6a_chr10:17723870-17724849_+	0.390887	0.153202	0.150275	0.811269	0.296193	0.00272571	0.474968	-0.16504	-0.0945257	1	1	0.990162	0.461661	0.255655	0
Cited2	ENSMUSG00000039910	502391	TGGTGCTGCCACCGCCGCTGCCGCC	chr10:17724519-17724543_+	chr10:17723870-17724849_+	+	53237_m6a_chr10:17723870-17724849_+	0.356039	0.333772	0.187432	0.516338	0.270398	0.152187	0.57433	0.167454	-0.0091255	1	1	0.994476	0.601319	0.0968924	0
Cited2	ENSMUSG00000039910	25346	CGGGCATGGTGCTGCCACCGCCGCT	chr10:17724525-17724549_+	chr10:17723870-17724849_+	+	53236_m6a_chr10:17723870-17724849_+	0.54466	0.0575002	0.110223	-0.513672	0.0574526	0.0742447	-0.0482818	-0.566049	-0.0663769	1	1	0.965181	0.932636	0.749575	0
Cited2	ENSMUSG00000039910	173120	CCGAGGCGGGCATGGTGCTGCCACC	chr10:17724531-17724555_+	chr10:17723870-17724849_+	+	53235_m6a_chr10:17723870-17724849_+	1.33441	0.619938	1.17737	0.298201	0.842686	0.90248	0.0450169	-0.286106	-0.041801	0.000195668	0.105146	0.182095	0.110953	0.519964	0
Cited2	ENSMUSG00000039910	828193	GAGCCACCGAGGCGGGCATGGTGCT	chr10:17724537-17724561_+	chr10:17723870-17724849_+	+	53234_m6a_chr10:17723870-17724849_+	0.095258	1.51007	1.42767	-0.31187	-0.371223	0.0267935	-1.05645	0.0814562	0.00758326	0.00336775	1	0.339588	0.977399	0.705058	0
Cited2	ENSMUSG00000039910	537177	GGACGTGAGCCACCGAGGCGGGCAT	chr10:17724543-17724567_+	chr10:17723870-17724849_+	+	53233_m6a_chr10:17723870-17724849_+	1.38239	1.47837	1.90865	0.404647	0.869695	0.988382	-0.152865	0.278322	0.281159	1.39082e-06	0.406126	0.0193515	0.0740183	0.130101	0
Cited2	ENSMUSG00000039910	737969	CCGCGGGGACGTGAGCCACCGAGGC	chr10:17724549-17724573_+	chr10:17723870-17724849_+	+	53232_m6a_chr10:17723870-17724849_+	0.681029	1.66307	1.47396	0.339694	0.407994	0.170263	-0.511664	0.3102	-0.422286	0.00443416	1	0.125365	0.679248	0.654034	0
Cited2	ENSMUSG00000039910	202278	GCATTGCCGCGGGGACGTGAGCCAC	chr10:17724555-17724579_+	chr10:17723870-17724849_+	+	53231_m6a_chr10:17723870-17724849_+	1.64047	1.59404	0.994513	1.57649	0.845418	0.75093	0.26782	0.0391808	0.264513	0.0395347	0.478428	0.0484969	0.0558915	0.0331181	0
Cited2	ENSMUSG00000039910	666582	GCGGCAGCATTGCCGCGGGGACGTG	chr10:17724561-17724585_+	chr10:17723870-17724849_+	+	53230_m6a_chr10:17723870-17724849_+	1.47338	2.09112	1.77568	0.229085	0.633899	0.192649	-0.457677	-0.358194	-0.564928	0.00899284	1	0.0155148	0.481222	0.987575	0
Cited2	ENSMUSG00000039910	299833	CATTGGGCGGCAGCATTGCCGCGGG	chr10:17724567-17724591_+	chr10:17723870-17724849_+	+	53229_m6a_chr10:17723870-17724849_+	0.69153	2.41278	1.9951	0.201741	0.262992	0.73822	-0.395889	-0.859819	0.372749	0.0321468	1	0.110889	0.385084	0.687508	0
Cited2	ENSMUSG00000039910	666117	CTATGACATTGGGCGGCAGCATTGC	chr10:17724573-17724597_+	chr10:17723870-17724849_+	+	53228_m6a_chr10:17723870-17724849_+	1.30958	0.448138	1.45198	0.359905	0.731975	0.701125	0.0907164	-3.37217	0.668865	0.547039	1	0.234069	0.0837657	0.700734	0
Cited2	ENSMUSG00000039910	93316	CAGTGTCTATGACATTGGGCGGCAG	chr10:17724579-17724603_+	chr10:17723870-17724849_+	+	53227_m6a_chr10:17723870-17724849_+	2.11408	2.32798	1.64041	1.06738	1.08545	0.914789	0.0255776	0.415791	0.480592	0.024232	1	0.012981	0.00315483	0.0541289	1
Cited2	ENSMUSG00000039910	441255	TGAAATCAGTGTCTATGACATTGGG	chr10:17724585-17724609_+	chr10:17723870-17724849_+	+	53226_m6a_chr10:17723870-17724849_+					-0.352193	-0.0908731	0.6072		0.76807	1	1	1	0.927771	0.0328627	0
Cited2	ENSMUSG00000039910	400454	CGTCGATGAAATCAGTGTCTATGAC	chr10:17724591-17724615_+	chr10:17723870-17724849_+	+	53225_m6a_chr10:17723870-17724849_+	-0.0526737	1.48566		0.201741	-1.30903		-0.00759318	1.05197		1	1	0.530889	0.777389	0.227406	0
Cited2	ENSMUSG00000039910	588534	CTTCCTCGTCGATGAAATCAGTGTC	chr10:17724597-17724621_+	chr10:17723870-17724849_+	+	53224_m6a_chr10:17723870-17724849_+	1.33035	1.72373	1.72395	-0.405635	0.378516	0.948613	0.0608847	-0.0235857	-0.0413728	0.0348317	1	0.0128811	0.533426	0.0547173	0
Cited2	ENSMUSG00000039910	873091	TAAGCACTTCCTCGTCGATGAAATC	chr10:17724603-17724627_+	chr10:17723870-17724849_+	+	53223_m6a_chr10:17723870-17724849_+	0.266609	1.44687	1.39501	-0.297553	-0.369917	-0.194713	-0.466553	0.459813	0.209835	0.599651	1	0.295	0.996794	0.314441	0
Cited2	ENSMUSG00000039910	919242	AGGACATAAGCACTTCCTCGTCGAT	chr10:17724609-17724633_+	chr10:17723870-17724849_+	+	53222_m6a_chr10:17723870-17724849_+	0.467599	1.41366	1.74056	0.0382729	-0.124182	0.129192	-0.641793	0.0341837	-0.245568	0.316892	1	0.194829	0.976536	0.788279	0
Cited2	ENSMUSG00000039910	799846	TCACTAAGGACATAAGCACTTCCTC	chr10:17724615-17724639_+	chr10:17723870-17724849_+	+	53221_m6a_chr10:17723870-17724849_+	-0.838197	0.738077	0.115022	-0.584777	-0.790304	-0.40105	-0.820444	0.350801	0.178765	1	1	0.885827	0.992945	0.508001	0
Cited2	ENSMUSG00000039910	187338	TTTCTATCACTAAGGACATAAGCAC	chr10:17724621-17724645_+	chr10:17723870-17724849_+	+	53220_m6a_chr10:17723870-17724849_+	1.29158	-0.683232	0.903396	2.30027	0.807989	-2.37844	0.0793462			1	1	0.659459	0.525868	1	0
Cited2	ENSMUSG00000039910	920941	AACCCATTTCTATCACTAAGGACAT	chr10:17724627-17724651_+	chr10:17723870-17724849_+	+	53219_m6a_chr10:17723870-17724849_+	-0.551795	0.851657	0.496652		0.899248	0.0186551	-0.887643			1	1	0.830862	0.418956	1	0
Cited2	ENSMUSG00000039910	55822	GGTCCAAACCCATTTCTATCACTAA	chr10:17724633-17724657_+	chr10:17723870-17724849_+	+	53218_m6a_chr10:17723870-17724849_+	1.49915	0.93293	1.40401		1.07117	0.709812	-0.0154772	-1.62716	-0.023325	0.0287039	0.458359	0.0542208	0.1017	0.762138	0
Cited2	ENSMUSG00000039910	886738	TGATGCGGTCCAAACCCATTTCTAT	chr10:17724639-17724663_+	chr10:17723870-17724849_+	+	53217_m6a_chr10:17723870-17724849_+	0.267279	1.67273	1.75466	0.182507	-0.490505	-0.236174	-1.24377	-0.918208	-0.390013	0.0473393	1	0.229041	0.942195	0.953952	0
Cited2	ENSMUSG00000039910	352168	GCTCCTTGATGCGGTCCAAACCCAT	chr10:17724645-17724669_+	chr10:17723870-17724849_+	+	53216_m6a_chr10:17723870-17724849_+	2.20602	1.14306	1.59491	0.665885	1.16202	1.39776	0.188971	-0.698173	-0.0489838	0.00121737	0.202892	0.0543072	0.0385738	0.625681	0
Cited2	ENSMUSG00000039910	350496	CGGGCAGCTCCTTGATGCGGTCCAA	chr10:17724651-17724675_+	chr10:17723870-17724849_+	+	53215_m6a_chr10:17723870-17724849_+	2.14017	1.22898	1.74696	0.663638	1.13015	1.3261	0.24087	-0.0635143	0.162905	0.000622731	0.30739	0.0370918	0.0356756	0.0786214	1
Cited2	ENSMUSG00000039910	184012	AGAGTTCGGGCAGCTCCTTGATGCG	chr10:17724657-17724681_+	chr10:17723870-17724849_+	+	53214_m6a_chr10:17723870-17724849_+	1.82206	1.549	1.81322	0.946767	1.20913	0.85266	-0.0559273	-0.176021	-0.210517	4.3627e-05	0.150511	0.00451117	0.0126226	0.83186	2	*
Cited2	ENSMUSG00000039910	320580	CCAGCCAGAGTTCGGGCAGCTCCTT	chr10:17724663-17724687_+	chr10:17723870-17724849_+	+	53213_m6a_chr10:17723870-17724849_+	1.99992	1.2096	1.64596	0.547673	1.03299	1.27263	0.0430737	-0.275073	-0.147074	4.89296e-05	0.143141	0.0342977	0.0522584	0.638442	1
Cited2	ENSMUSG00000039910	125888	TTTGGCCCAGCCAGAGTTCGGGCAG	chr10:17724669-17724693_+	chr10:17723870-17724849_+	+	53212_m6a_chr10:17723870-17724849_+	2.12812	1.67156	2.19657	1.71872	1.40521	1.01536	-0.101935	-0.195732	0.0674879	1.45031e-18	4.02064e-08	0.00906118	0.0182528	0.445391	2	**
Cited2	ENSMUSG00000039910	60531	ACTCATTTTGGCCCAGCCAGAGTTC	chr10:17724675-17724699_+	chr10:17723870-17724849_+	+	53211_m6a_chr10:17723870-17724849_+	1.06976	0.649989	0.362755	0.595316	0.703701	1.34628	0.466255	-0.815671	-0.567874	0.843112	0.492103	0.658738	0.0744248	0.682068	1
Cited2	ENSMUSG00000039910	278130	AATCAAACTCATTTTGGCCCAGCCA	chr10:17724681-17724705_+	chr10:17723870-17724849_+	+	53210_m6a_chr10:17723870-17724849_+	0.731523	1.16683	0.776854	0.654519	0.576285	0.177126	-0.159891	0.327453	0.654107	1	1	0.271547	0.243488	0.132483	0
Cited2	ENSMUSG00000039910	547239	TCATAAAATCAAACTCATTTTGGCC	chr10:17724687-17724711_+	chr10:17723870-17724849_+	+	53209_m6a_chr10:17723870-17724849_+	1.07327	-0.766371			-0.699515	1.27422	-0.355682			1	1	0.693013	0.518368	1	0
Cited2	ENSMUSG00000039910	553157	AGTCCGTCATAAAATCAAACTCATT	chr10:17724693-17724717_+	chr10:17723870-17724849_+	+	53208_m6a_chr10:17723870-17724849_+	-0.348573				0.345107	1.05069				1	1	1	0.249664	1	0
Cited2	ENSMUSG00000039910	901606	ACACGAAGTCCGTCATAAAATCAAA	chr10:17724699-17724723_+	chr10:17723870-17724849_+	+	53207_m6a_chr10:17723870-17724849_+	0.685633				-0.578151	0.0186551	-0.351712		-1.60159	1	1	1	0.858035	0.804791	0
Cited2	ENSMUSG00000039910	688647	GCTTGCACACGAAGTCCGTCATAAA	chr10:17724705-17724729_+	chr10:17723870-17724849_+	+	53206_m6a_chr10:17723870-17724849_+	1.48581	1.42441	1.61661	0.259061	0.880688	0.677495	0.337909	-0.0333586	0.0164929	0.0461073	1	0.0030901	0.144693	0.117278	0
Cited2	ENSMUSG00000039910	245639	GCTGCTGCTTGCACACGAAGTCCGT	chr10:17724711-17724735_+	chr10:17723870-17724849_+	+	53205_m6a_chr10:17723870-17724849_+	1.11637	0.515251	0.736327	0.690798	0.915105	0.893861	0.293185	-0.106898	0.0291964	0.891025	0.867996	0.504132	0.0103608	0.152525	0
Cited2	ENSMUSG00000039910	905513	TGCTGGGCTGCTGCTTGCACACGAA	chr10:17724717-17724741_+	chr10:17723870-17724849_+	+	53204_m6a_chr10:17723870-17724849_+	-0.0307244	0.54318	0.116351	-0.119932	-0.322983	0.144956	-0.566914	-0.529038	-0.828311	1	1	0.961258	0.959031	0.986114	0
Cited2	ENSMUSG00000039910	627166	TGACTCTGCTGGGCTGCTGCTTGCA	chr10:17724723-17724747_+	chr10:17723870-17724849_+	+	53203_m6a_chr10:17723870-17724849_+	0.752402	0.912359	0.474486	0.377417	0.456686	0.447662	-0.212453	0.214693	-0.331978	1	1	0.698571	0.0402414	0.545026	0
Cited2	ENSMUSG00000039910	477139	AACAGCTGACTCTGCTGGGCTGCTG	chr10:17724729-17724753_+	chr10:17723870-17724849_+	+	53202_m6a_chr10:17723870-17724849_+	1.66268	1.8309	1.67518	0.839574	1.0465	0.646238	-0.200624	0.0935917	0.228091	0.00515964	0.885592	0.0016786	0.0247694	0.207624	1
Cited2	ENSMUSG00000039910	170769	CGAGTCAACAGCTGACTCTGCTGGG	chr10:17724735-17724759_+	chr10:17723870-17724849_+	+	53201_m6a_chr10:17723870-17724849_+	1.59228	0.522704	1.26898	0.797699	0.89836	0.690905	0.0501601	-0.850939	-0.906585	0.206141	0.892576	0.199599	0.00858129	0.869305	0
Cited2	ENSMUSG00000039910	311164	GTTAACCGAGTCAACAGCTGACTCT	chr10:17724741-17724765_+	chr10:17723870-17724849_+	+	53200_m6a_chr10:17723870-17724849_+	0.852032		1.56308	-0.180119	0.0371489	-0.587043	0.541993			1	1	0.225029	0.957621	1	0
Cited2	ENSMUSG00000039910	303170	TGCGAGGTTAACCGAGTCAACAGCT	chr10:17724747-17724771_+	chr10:17723870-17724849_+	+	53199_m6a_chr10:17723870-17724849_+	2.35089		-0.0499289		0.373799	1.37422	0.41596		0.765939	1	1	0.407472	0.240904	0.0802136	0
Cited2	ENSMUSG00000039910	27338	TCCGCCTGCGAGGTTAACCGAGTCA	chr10:17724753-17724777_+	chr10:17723870-17724849_+	+	53198_m6a_chr10:17723870-17724849_+	1.22954	0.475506	0.684809	0.324586	0.99791	0.759347	0.0748232	-0.214848	-0.391333	0.889339	1	0.491741	0.109063	0.709006	0
Cited2	ENSMUSG00000039910	252674	TTTCTTTCCGCCTGCGAGGTTAACC	chr10:17724759-17724783_+	chr10:17723870-17724849_+	+	53197_m6a_chr10:17723870-17724849_+	1.36195	0.493625	1.13013	0.26484	0.828409	0.801791	0.273683	-0.289019	-0.0569519	0.635067	1	0.257249	0.129019	0.365284	0
Cited2	ENSMUSG00000039910	351600	GGGTGATTTCTTTCCGCCTGCGAGG	chr10:17724765-17724789_+	chr10:17723870-17724849_+	+	53196_m6a_chr10:17723870-17724849_+	1.58098	1.12757	0.964448	1.58826	1.10425	0.829722	0.743686	0.363885	-0.101339	0.275435	0.460425	0.0717137	0.0322893	0.112382	0
Cited2	ENSMUSG00000039910	892255	TGGGGAGGGTGATTTCTTTCCGCCT	chr10:17724771-17724795_+	chr10:17723870-17724849_+	+	53195_m6a_chr10:17723870-17724849_+	-0.995384	0.634278	0.590695	-0.314335	-0.988379	-0.325317	-1.35584	-0.0178996	0.0364674	1	1	0.843005	0.971141	0.742477	0
Cited2	ENSMUSG00000039910	905673	GTGGGGTGGGGAGGGTGATTTCTTT	chr10:17724777-17724801_+	chr10:17723870-17724849_+	+	53194_m6a_chr10:17723870-17724849_+	-0.943043	0.384378	0.136363	0.0946056	-0.760475	-0.298981	-0.659353	0.598021	0.759906	1	1	0.925291	0.94275	0.273932	0
Cited2	ENSMUSG00000039910	237518	GTGGGGGTGGGGTGGGGAGGGTGAT	chr10:17724783-17724807_+	chr10:17723870-17724849_+	+	53193_m6a_chr10:17723870-17724849_+	-0.121279	0.154144	0.150993	0.0650066	-0.076412	-0.482983	-0.378546	0.71152	1.10904	1	1	0.992362	0.954898	0.164414	0
Cited2	ENSMUSG00000039910	520982	TTGGGGGTGGGGGTGGGGTGGGGAG	chr10:17724789-17724813_+	chr10:17723870-17724849_+	+	53192_m6a_chr10:17723870-17724849_+	-0.270771	0.254389	-0.0522743	0.0323301	-0.498011	-0.451423	-0.277823	0.486239	0.602834	1	1	0.983373	0.969105	0.161583	0
Cited2	ENSMUSG00000039910	68514	AAGAAGTTGGGGGTGGGGGTGGGGT	chr10:17724795-17724819_+	chr10:17723870-17724849_+	+	53191_m6a_chr10:17723870-17724849_+	-0.190313	0.530898	0.380999	-0.0161499	-0.0440737	-0.363409	0.152352	0.827352	0.77169	1	1	0.935487	0.975598	0.0448793	0
Cited2	ENSMUSG00000039910	799400	ACACCGAAGAAGTTGGGGGTGGGGG	chr10:17724801-17724825_+	chr10:17723870-17724849_+	+	53190_m6a_chr10:17723870-17724849_+	-0.830426	0.986697	0.42744	-0.00909341	-0.828193	-0.504912	-0.453721	0.0918997	0.917568	1	1	0.808827	0.96009	0.281455	0
Cited2	ENSMUSG00000039910	251209	TAATTCACACCGAAGAAGTTGGGGG	chr10:17724807-17724831_+	chr10:17723870-17724849_+	+	53189_m6a_chr10:17723870-17724849_+	-0.619786	0.741684	0.636788	-0.227338	-0.292063	-0.469555	-0.23099	0.942672	0.702611	1	1	0.828295	0.994328	0.129062	0
Cited2	ENSMUSG00000039910	364034	TTTTTTTAATTCACACCGAAGAAGT	chr10:17724813-17724837_+	chr10:17723870-17724849_+	+	53188_m6a_chr10:17723870-17724849_+	-1.12878		2.13897			1.10609	-0.246227		0.0267821	1	1	0.555211	1	0.548651	0
Cited2	ENSMUSG00000039910	800240	TTGTTTTTTTTTTAATTCACACCGA	chr10:17724819-17724843_+	chr10:17723870-17724849_+	+	53187_m6a_chr10:17723870-17724849_+	-0.12535	0.0787766	2.26497	1.06855	-0.26091	1.37081		-0.859819	0.0267821	1	1	0.523959	0.262884	0.702684	0
Cited2	ENSMUSG00000039910	201681	GTTTTTTTGTTTTTTTTTTAATTCA	chr10:17724825-17724849_+	chr10:17723870-17724849_+	+	53186_m6a_chr10:17723870-17724849_+	0.537422		0.613755	1.12395	1.31772	1.89471	0.580822	2.49691	1.47661	1	1	0.944274	0.0207338	0.0505034	0
Gja1	ENSMUSG00000050953	315062	TAAGAAAAACAAAAACAAAAACCAC	chr10:56387508-56387532_+	chr10:56387507-56389080_+	+	56509_m6a_chr10:56387507-56389080_+	0.932223				-1.21552		0.0699246	1.05197		1	1	1	1	0.210107	0
Gja1	ENSMUSG00000050953	365215	ACCTCCTAAGAAAAACAAAAACAAA	chr10:56387514-56387538_+	chr10:56387507-56389080_+	+	56508_m6a_chr10:56387507-56389080_+	-1.10252		0.066417		0.0356121	-0.299077	-0.00759318	-0.271827	-0.328453	1	1	0.893558	0.933486	0.841826	0
Gja1	ENSMUSG00000050953	684176	CTGGGCACCTCCTAAGAAAAACAAA	chr10:56387520-56387544_+	chr10:56387507-56389080_+	+	56507_m6a_chr10:56387507-56389080_+	-0.454194	-0.239115	0.356668	-0.0153991	-0.397815	-0.255936	-0.387658	0.0569675	0.437	1	1	0.98287	0.992154	0.348601	0
Gja1	ENSMUSG00000050953	838015	CCATGTCTGGGCACCTCCTAAGAAA	chr10:56387526-56387550_+	chr10:56387507-56389080_+	+	56506_m6a_chr10:56387507-56389080_+	0.354486	0.0912391	0.76914	0.479657	-0.265183	0.382913	0.155449	0.627315	0.454141	1	1	0.969303	0.905469	0.0361999	0
Gja1	ENSMUSG00000050953	65778	AGTCACCCATGTCTGGGCACCTCCT	chr10:56387532-56387556_+	chr10:56387507-56389080_+	+	56505_m6a_chr10:56387507-56389080_+	1.94706	1.44969	1.10199	1.58067	1.2053	1.50991	0.720763	0.0626796	0.0800738	0.00134318	0.00664322	0.152378	0.0106989	0.119371	0
Gja1	ENSMUSG00000050953	478801	CGCTCCAGTCACCCATGTCTGGGCA	chr10:56387538-56387562_+	chr10:56387507-56389080_+	+	56504_m6a_chr10:56387507-56389080_+	1.80313	1.57847	1.4929	0.780094	1.10435	0.898978	-0.211212	-0.27563	0.128306	3.33218e-09	0.0140156	0.0190168	0.0519587	0.630417	0
Gja1	ENSMUSG00000050953	814877	CCAAGGCGCTCCAGTCACCCATGTC	chr10:56387544-56387568_+	chr10:56387507-56389080_+	+	56503_m6a_chr10:56387507-56389080_+	1.78511	1.45646	1.286	0.952451	0.720493	0.495737	0.148457	0.0646597	0.104583	5.38488e-07	0.309613	0.0713149	0.334362	0.00903852	0
Gja1	ENSMUSG00000050953	518294	GCTTCCCCAAGGCGCTCCAGTCACC	chr10:56387550-56387574_+	chr10:56387507-56389080_+	+	56502_m6a_chr10:56387507-56389080_+	2.14816	1.50878	1.42994	1.4185	1.31046	1.10836	0.557883	0.04205	-0.213206	1.29781e-08	0.000364199	0.0722193	0.0103566	0.234917	0
Gja1	ENSMUSG00000050953	650659	CCAGCAGCTTCCCCAAGGCGCTCCA	chr10:56387556-56387580_+	chr10:56387507-56389080_+	+	56501_m6a_chr10:56387507-56389080_+	1.39453	1.34066	1.13821	0.267925	0.508626	0.626404	-0.329523	-0.249377	-0.227149	5.76487e-08	0.526174	0.122567	0.893079	0.988	0
Gja1	ENSMUSG00000050953	110765	CCTTGTCCAGCAGCTTCCCCAAGGC	chr10:56387562-56387586_+	chr10:56387507-56389080_+	+	56500_m6a_chr10:56387507-56389080_+	1.85694	0.667123	1.09076	0.304123	0.985577	1.0648	0.00582707	-0.536194	-0.0348096	0.000105967	0.0857454	0.458709	0.325205	0.714039	0
Gja1	ENSMUSG00000050953	937040	CTTGGACCTTGTCCAGCAGCTTCCC	chr10:56387568-56387592_+	chr10:56387507-56389080_+	+	56499_m6a_chr10:56387507-56389080_+	0.74615	1.33264	1.57857	0.414357	-0.0167164	0.192892	-0.580835	-0.0280303	0.00637394	0.0212257	1	0.422227	0.967059	0.716421	0
Gja1	ENSMUSG00000050953	966	AGTAGGCTTGGACCTTGTCCAGCAG	chr10:56387574-56387598_+	chr10:56387507-56389080_+	+	56498_m6a_chr10:56387507-56389080_+	1.48567	0.961503	0.98662	0.891554	0.994738	1.01435	0.314731	-0.247103	-0.308503	0.0335382	0.194688	0.540339	0.00740602	0.515425	0
Gja1	ENSMUSG00000050953	428606	CCGTGGAGTAGGCTTGGACCTTGTC	chr10:56387580-56387604_+	chr10:56387507-56389080_+	+	56497_m6a_chr10:56387507-56389080_+	1.88927	1.34116	1.38692	0.421377	1.04906	1.09062	0.334475	0.209372	0.13152	0.00310947	0.821999	0.0831113	0.230164	0.0187328	0
Gja1	ENSMUSG00000050953	943978	CTCCGGCCGTGGAGTAGGCTTGGAC	chr10:56387586-56387610_+	chr10:56387507-56389080_+	+	56496_m6a_chr10:56387507-56389080_+	-0.0425936	0.678893	1.07282	-0.13732	-0.665176	-0.227722	-1.01222	-0.278966	-0.444822	0.934622	1	0.894828	0.987245	0.925103	0
Gja1	ENSMUSG00000050953	937762	CCTTCCCTCCGGCCGTGGAGTAGGC	chr10:56387592-56387616_+	chr10:56387507-56389080_+	+	56495_m6a_chr10:56387507-56389080_+	-0.159414	0.558819	0.417962	-0.454743	-0.885412	-0.48093	-1.51644	-0.453109	-0.539153	1	1	0.97215	0.994032	0.922905	0
Gja1	ENSMUSG00000050953	593059	GCCACACCTTCCCTCCGGCCGTGGA	chr10:56387598-56387622_+	chr10:56387507-56389080_+	+	56494_m6a_chr10:56387507-56389080_+	1.96031	1.20778	1.18608	1.39138	0.965235	1.20657	0.531778	-0.0689608	-0.345176	0.0988422	0.435349	0.18813	0.0250481	0.355102	0
Gja1	ENSMUSG00000050953	194344	CCGACAGCCACACCTTCCCTCCGGC	chr10:56387604-56387628_+	chr10:56387507-56389080_+	+	56493_m6a_chr10:56387507-56389080_+	1.57605	0.331667	0.41009	0.128311	0.957904	1.0624	-0.00251612	-0.649807	-0.533539	1	1	0.783425	0.430357	0.877117	0
Gja1	ENSMUSG00000050953	652230	AGAGCACCGACAGCCACACCTTCCC	chr10:56387610-56387634_+	chr10:56387507-56389080_+	+	56492_m6a_chr10:56387507-56389080_+	1.47826	1.4644	1.13179	0.41038	0.452471	0.578876	-0.206939	-0.0750586	-0.0694293	0.496055	1	0.114412	0.963457	0.791138	0
Gja1	ENSMUSG00000050953	130329	AAATGAAGAGCACCGACAGCCACAC	chr10:56387616-56387640_+	chr10:56387507-56389080_+	+	56491_m6a_chr10:56387507-56389080_+	1.5974	0.559644	1.52449	0.266066	0.971939	0.848221	-0.230614	-0.65291	-0.0258617	0.646786	1	0.433938	0.438758	0.831722	0
Gja1	ENSMUSG00000050953	165710	TTCTGAAAATGAAGAGCACCGACAG	chr10:56387622-56387646_+	chr10:56387507-56389080_+	+	56490_m6a_chr10:56387507-56389080_+	0.124161			1.87633	0.328155	-0.0908731	0.319355		1.24342	1	1	1	0.472203	0.15801	0
Gja1	ENSMUSG00000050953	653119	GCAGGATTCTGAAAATGAAGAGCAC	chr10:56387628-56387652_+	chr10:56387507-56389080_+	+	56489_m6a_chr10:56387507-56389080_+	0.915723			0.75656		0.149613	0.566785	1.41718		1	1	1	0.688633	0.121055	0
Gja1	ENSMUSG00000050953	218214	CCAGGAGCAGGATTCTGAAAATGAA	chr10:56387634-56387658_+	chr10:56387507-56389080_+	+	56488_m6a_chr10:56387507-56389080_+	1.95402	0.532564	0.613755		0.0581471	0.190414	0.356246	-1.26342		0.944114	1	0.598299	0.960716	0.640281	0
Gja1	ENSMUSG00000050953	497192	CTGTCCCCAGGAGCAGGATTCTGAA	chr10:56387640-56387664_+	chr10:56387507-56389080_+	+	56487_m6a_chr10:56387507-56389080_+	2.03372	1.7187	1.54043	1.85736	1.27673	1.27718	0.641618	0.223343	0.106064	0.332441	0.843302	0.0265889	0.0261159	0.0677605	1
Gja1	ENSMUSG00000050953	376866	CAACCGCTGTCCCCAGGAGCAGGAT	chr10:56387646-56387670_+	chr10:56387507-56389080_+	+	56486_m6a_chr10:56387507-56389080_+	2.0886	0.458737	0.456384	0.17679	1.09394	1.19247	0.180138	-1.08676	-0.687154	0.998167	1	0.60363	0.331556	0.827998	0
Gja1	ENSMUSG00000050953	37676	CTGACTCAACCGCTGTCCCCAGGAG	chr10:56387652-56387676_+	chr10:56387507-56389080_+	+	56485_m6a_chr10:56387507-56389080_+	1.6295	0.555124	0.968033	0.327407	1.11278	1.06505	-0.0564938	-1.21953	-0.191601	0.664385	1	0.62397	0.278491	0.813303	0
Gja1	ENSMUSG00000050953	890289	CCCAAGCTGACTCAACCGCTGTCCC	chr10:56387658-56387682_+	chr10:56387507-56389080_+	+	56484_m6a_chr10:56387507-56389080_+	-0.0841439	1.32965	1.37715	0.0121078	-0.772299	-0.121113	-1.25284	-0.111758	-0.127652	0.222292	1	0.696598	0.970399	0.811641	0
Gja1	ENSMUSG00000050953	554693	CATCACCCCAAGCTGACTCAACCGC	chr10:56387664-56387688_+	chr10:56387507-56389080_+	+	56483_m6a_chr10:56387507-56389080_+	1.54786	0.771117	0.999834	0.00224423	0.587884	0.838131	-0.095302	-0.224819	-0.259405	0.0727396	1	0.58741	0.72987	0.9323	0
Gja1	ENSMUSG00000050953	547819	ACTGTTCATCACCCCAAGCTGACTC	chr10:56387670-56387694_+	chr10:56387507-56389080_+	+	56482_m6a_chr10:56387507-56389080_+	1.59123	1.30859	1.31734	0.62469	0.841928	0.944083	-0.119186	-0.0886266	-0.430981	0.00250867	0.467159	0.0606332	0.130444	0.83721	0
Gja1	ENSMUSG00000050953	15981	AGGCAGACTGTTCATCACCCCAAGC	chr10:56387676-56387700_+	chr10:56387507-56389080_+	+	56481_m6a_chr10:56387507-56389080_+	2.22131	1.39104	1.44015	1.60263	1.52506	1.66324	0.771492	0.0450295	0.0137096	0.00184485	0.00935757	0.0964236	0.000903411	0.147305	0
Gja1	ENSMUSG00000050953	876696	AGCGAAAGGCAGACTGTTCATCACC	chr10:56387682-56387706_+	chr10:56387507-56389080_+	+	56480_m6a_chr10:56387507-56389080_+	1.10007	1.9711	2.02845	0.88313	0.413755	0.431924	-0.493178	0.155415	0.239423	5.17398e-05	1	0.108207	0.675071	0.441065	0
Gja1	ENSMUSG00000050953	461604	TGTTACAGCGAAAGGCAGACTGTTC	chr10:56387688-56387712_+	chr10:56387507-56389080_+	+	56479_m6a_chr10:56387507-56389080_+	0.123633	2.22271	2.42694	1.29622	1.71401	0.953389	0.654251	0.526603	-0.232573	0.00267366	0.0745456	0.310266	0.0472384	0.148139	0
Gja1	ENSMUSG00000050953	179566	GTTGAGTGTTACAGCGAAAGGCAGA	chr10:56387694-56387718_+	chr10:56387507-56389080_+	+	56478_m6a_chr10:56387507-56389080_+	1.68077	1.53893	1.47471	1.48966	1.13363	1.42618	0.422683	-0.860034	-1.14272	3.9424e-05	0.00186885	0.0111581	0.0120844	0.777752	1
Gja1	ENSMUSG00000050953	832021	CGGGTTGTTGAGTGTTACAGCGAAA	chr10:56387700-56387724_+	chr10:56387507-56389080_+	+	56477_m6a_chr10:56387507-56389080_+	0.274554	1.07153	1.68554	0.246221	0.00548465	0.415879	-1.07648	-0.247206	-0.106325	0.685673	1	0.628482	0.966273	0.843671	0
Gja1	ENSMUSG00000050953	489963	CACAACCGGGTTGTTGAGTGTTACA	chr10:56387706-56387730_+	chr10:56387507-56389080_+	+	56476_m6a_chr10:56387507-56389080_+	1.80206	1.55047	1.44105	1.51565	1.12432	0.885033	0.549871	0.0674689	-0.0939837	0.0992844	0.700232	0.0278464	0.0531827	0.165579	0
Gja1	ENSMUSG00000050953	112767	CATTTTCACAACCGGGTTGTTGAGT	chr10:56387712-56387736_+	chr10:56387507-56389080_+	+	56475_m6a_chr10:56387507-56389080_+	1.03617	0.867564	1.01654	1.2836	0.69528	-0.0664195	0.157488	-0.911451	0.904278	0.765456	1	0.965077	0.518029	0.41938	0
Gja1	ENSMUSG00000050953	233938	AGCAGACATTTTCACAACCGGGTTG	chr10:56387718-56387742_+	chr10:56387507-56389080_+	+	56474_m6a_chr10:56387507-56389080_+	1.41326	1.22856	1.09671	0.792528	1.08949	0.651128	-0.139514	-0.104801	0.0354991	0.140895	0.857849	0.232899	0.14238	0.486586	0
Gja1	ENSMUSG00000050953	360964	TGTCATAGCAGACATTTTCACAACC	chr10:56387724-56387748_+	chr10:56387507-56389080_+	+	56473_m6a_chr10:56387507-56389080_+	0.862437	0.260002	-0.163439	-1.07713	0.508128	-0.262848	0.0764875	-2.35088	-1.49811	1	1	0.947489	0.911065	0.881369	0
Gja1	ENSMUSG00000050953	279671	AGGACTTGTCATAGCAGACATTTTC	chr10:56387730-56387754_+	chr10:56387507-56389080_+	+	56472_m6a_chr10:56387507-56389080_+	0.425602		-0.212942	0.644927	0.945637	0.479884	0.18512	-0.766837	0.1926	1	1	0.906694	0.416341	0.563917	0
Gja1	ENSMUSG00000050953	708275	TGGGGAAGGACTTGTCATAGCAGAC	chr10:56387736-56387760_+	chr10:56387507-56389080_+	+	56471_m6a_chr10:56387507-56389080_+	1.48169	1.52329	1.30487	1.18941	1.17799	0.485845	0.283676	0.0389143	-0.253765	0.0630812	0.720324	0.0277086	0.167055	0.302298	0
Gja1	ENSMUSG00000050953	866161	GAGAGATGGGGAAGGACTTGTCATA	chr10:56387742-56387766_+	chr10:56387507-56389080_+	+	56470_m6a_chr10:56387507-56389080_+	1.1892	1.38336	0.504204	-0.330832	0.615254	0.0948075	-0.226431	0.0048562	-0.334597	0.610198	1	0.672433	0.904118	0.813161	0
Gja1	ENSMUSG00000050953	493705	GCACGTGAGAGATGGGGAAGGACTT	chr10:56387748-56387772_+	chr10:56387507-56389080_+	+	56469_m6a_chr10:56387507-56389080_+	1.88813	1.80562	1.52371	1.7694	1.23452	1.22023	0.778564	0.159628	0.0688389	0.140968	0.635721	0.0174473	0.0266848	0.104645	1
Gja1	ENSMUSG00000050953	389783	AGAAGCGCACGTGAGAGATGGGGAA	chr10:56387754-56387778_+	chr10:56387507-56389080_+	+	56468_m6a_chr10:56387507-56389080_+	1.94163	1.54552	1.71201	0.428602	1.21996	1.29635	0.0847012	0.114833	0.0785841	4.53022e-05	0.232979	0.0192045	0.181478	0.00230763	0
Gja1	ENSMUSG00000050953	258929	GGACCCAGAAGCGCACGTGAGAGAT	chr10:56387760-56387784_+	chr10:56387507-56389080_+	+	56467_m6a_chr10:56387507-56389080_+	1.95725	1.25603	1.1709	1.23387	1.21799	0.749022	-0.319205	-0.17055	-0.00373653	0.00052146	0.0632324	0.177586	0.0617413	0.792322	0
Gja1	ENSMUSG00000050953	937670	TCTGAAGGACCCAGAAGCGCACGTG	chr10:56387766-56387790_+	chr10:56387507-56389080_+	+	56466_m6a_chr10:56387507-56389080_+	0.0811427	0.867311	0.408138	-0.172225	-0.921855	-0.389548	-1.39122	-0.481977	-0.608753	1	1	0.95546	0.982303	0.941405	0
Gja1	ENSMUSG00000050953	275985	ATATGATCTGAAGGACCCAGAAGCG	chr10:56387772-56387796_+	chr10:56387507-56389080_+	+	56465_m6a_chr10:56387507-56389080_+	1.73248	0.836133	1.67909	1.1591	0.796116	0.69496	0.126674	0.197435	-0.468273	0.00252492	0.327146	0.238608	0.124999	0.460628	0
Gja1	ENSMUSG00000050953	340230	ACACGAATATGATCTGAAGGACCCA	chr10:56387778-56387802_+	chr10:56387507-56389080_+	+	56464_m6a_chr10:56387507-56389080_+	0.546173	-0.683232	-0.494542	-0.220161	-0.19194	1.2442	-0.203135		0.372749	1	1	0.965313	0.742919	0.341578	0
Gja1	ENSMUSG00000050953	130227	GCACAGACACGAATATGATCTGAAG	chr10:56387784-56387808_+	chr10:56387507-56389080_+	+	56463_m6a_chr10:56387507-56389080_+	-0.203048	-0.411712	-0.847934		0.918878	-0.945756	-1.21298	1.05197		1	1	0.993513	0.698542	0.502492	0
Gja1	ENSMUSG00000050953	212814	GTGTGGGCACAGACACGAATATGAT	chr10:56387790-56387814_+	chr10:56387507-56389080_+	+	56462_m6a_chr10:56387507-56389080_+	1.44903	1.65781	1.20539	1.74129	1.41355	0.555717	0.137452	-0.127141	0.550804	0.0108263	0.101003	0.0858714	0.121415	0.160043	0
Gja1	ENSMUSG00000050953	739179	ACAGGAGTGTGGGCACAGACACGAA	chr10:56387796-56387820_+	chr10:56387507-56389080_+	+	56461_m6a_chr10:56387507-56389080_+	1.19088	1.25096	1.26886	0.137854	0.380294	0.391747	-0.52759	-0.178919	-0.242075	0.0521176	1	0.0454669	0.974727	0.924905	0
Gja1	ENSMUSG00000050953	275033	CCAAGTACAGGAGTGTGGGCACAGA	chr10:56387802-56387826_+	chr10:56387507-56389080_+	+	56460_m6a_chr10:56387507-56389080_+	2.09709	1.82262	1.85343	1.58686	1.35767	0.938362	0.157578	0.0370714	0.0949657	0.00029815	0.118939	0.00639483	0.0392751	0.0201217	0
Gja1	ENSMUSG00000050953	26484	CGTGAGCCAAGTACAGGAGTGTGGG	chr10:56387808-56387832_+	chr10:56387507-56389080_+	+	56459_m6a_chr10:56387507-56389080_+	2.09576	1.70354	1.77168	1.59587	1.47328	1.41774	0.488923	-0.20628	-0.142135	0.00298181	0.0697186	0.014584	0.0019592	0.323347	1
Gja1	ENSMUSG00000050953	604006	AGAACACGTGAGCCAAGTACAGGAG	chr10:56387814-56387838_+	chr10:56387507-56389080_+	+	56458_m6a_chr10:56387507-56389080_+	1.62712	1.5856	1.37479	0.273435	0.972336	0.942166	-0.0448847	-0.678087	-0.760616	0.024092	1	0.0214346	0.391248	0.89884	0
Gja1	ENSMUSG00000050953	702363	TCACATAGAACACGTGAGCCAAGTA	chr10:56387820-56387844_+	chr10:56387507-56389080_+	+	56457_m6a_chr10:56387507-56389080_+	-0.12535	0.698953	0.40473	-0.728936	1.0056		-0.674877	-0.349367	-2.01587	1	1	0.963111	0.671679	0.896961	0
Gja1	ENSMUSG00000050953	883914	TTCTCATCACATAGAACACGTGAGC	chr10:56387826-56387850_+	chr10:56387507-56389080_+	+	56456_m6a_chr10:56387507-56389080_+	1.07162	1.18776	1.98534	0.911077	0.547935	0.492039	-0.126869	0.590436	-0.285636	0.0391103	1	0.237312	0.519033	0.337529	0
Gja1	ENSMUSG00000050953	864849	CTTCCTTTCTCATCACATAGAACAC	chr10:56387832-56387856_+	chr10:56387507-56389080_+	+	56455_m6a_chr10:56387507-56389080_+	0.390027	1.48099	1.26463	0.0556969	0.0637359	0.27016	-0.794459	-0.436852	-1.35302	0.2954	1	0.622246	0.991379	0.951228	0
Gja1	ENSMUSG00000050953	171575	GCTTCTCTTCCTTTCTCATCACATA	chr10:56387838-56387862_+	chr10:56387507-56389080_+	+	56454_m6a_chr10:56387507-56389080_+	1.5077	1.20935	1.04748	0.842771	1.10968	1.01689	-0.091919	-0.262405	-0.0252884	0.163286	0.618655	0.285155	0.0255959	0.740907	0
Gja1	ENSMUSG00000050953	775231	TGTTCAGCTTCTCTTCCTTTCTCAT	chr10:56387844-56387868_+	chr10:56387507-56389080_+	+	56453_m6a_chr10:56387507-56389080_+	0.79219	1.21341	1.30279	0.216821	0.282924	0.393286	-0.755128	-0.0676466	0.0355023	0.354282	1	0.63281	0.990068	0.73882	0
Gja1	ENSMUSG00000050953	746871	CTTTCTTGTTCAGCTTCTCTTCCTT	chr10:56387850-56387874_+	chr10:56387507-56389080_+	+	56452_m6a_chr10:56387507-56389080_+	0.882077	1.132	1.13425	0.276299	0.419466	0.248578	-0.379759	-0.0735365	-0.00329046	0.07852	1	0.847965	0.988471	0.721048	0
Gja1	ENSMUSG00000050953	603469	CCTCTTCTTTCTTGTTCAGCTTCTC	chr10:56387856-56387880_+	chr10:56387507-56389080_+	+	56451_m6a_chr10:56387507-56389080_+	2.03935	1.45781	1.28088	1.18085	1.22127	1.09176	0.468605	0.198129	-0.119786	0.00252278	0.177917	0.101161	0.00282056	0.136941	0
Gja1	ENSMUSG00000050953	88881	TGAGCTCCTCTTCTTTCTTGTTCAG	chr10:56387862-56387886_+	chr10:56387507-56389080_+	+	56450_m6a_chr10:56387507-56389080_+	2.00255	1.14483	1.21678	1.77378	1.28977	1.53637	0.735438	0.206947	-0.0274688	1.95985e-05	8.38935e-06	0.200516	0.0122591	0.11851	0
Gja1	ENSMUSG00000050953	142067	CCACTTTGAGCTCCTCTTCTTTCTT	chr10:56387868-56387892_+	chr10:56387507-56389080_+	+	56449_m6a_chr10:56387507-56389080_+	1.80619	1.44453	1.14598	1.67789	1.09391	0.896737	0.324497	0.0093234	0.0228921	0.0415415	0.263659	0.127526	0.0687274	0.102594	0
Gja1	ENSMUSG00000050953	457521	TCTGCGCCACTTTGAGCTCCTCTTC	chr10:56387874-56387898_+	chr10:56387507-56389080_+	+	56448_m6a_chr10:56387507-56389080_+	1.90903	1.35727	1.3007	0.762757	1.0574	1.04366	-0.0236995	-0.182487	-0.262117	0.0362877	0.692806	0.103087	0.0452169	0.824327	0
Gja1	ENSMUSG00000050953	442769	CGTCGGTCTGCGCCACTTTGAGCTC	chr10:56387880-56387904_+	chr10:56387507-56389080_+	+	56447_m6a_chr10:56387507-56389080_+	2.20296	1.26087	1.44464	0.74832	1.20697	1.18174	0.124417	-0.0641759	-0.0316186	0.0212504	0.567041	0.121627	0.0604549	0.148906	0
Gja1	ENSMUSG00000050953	739140	TGACCCCGTCGGTCTGCGCCACTTT	chr10:56387886-56387910_+	chr10:56387507-56389080_+	+	56446_m6a_chr10:56387507-56389080_+	1.46332	1.02057	1.15102	-0.250956	0.504964	0.330067	-0.576055	-0.258488	-0.224808	0.178427	1	0.376139	0.909951	0.93585	0
Gja1	ENSMUSG00000050953	937599	CCACGTTGACCCCGTCGGTCTGCGC	chr10:56387892-56387916_+	chr10:56387507-56389080_+	+	56445_m6a_chr10:56387507-56389080_+	0.438279	0.874765	0.609767	-0.507745	-0.544071	-0.158898	-1.23286	-0.953261	-1.03307	1	1	0.972926	0.993435	0.996588	0
Gja1	ENSMUSG00000050953	906167	GCATCTCCACGTTGACCCCGTCGGT	chr10:56387898-56387922_+	chr10:56387507-56389080_+	+	56444_m6a_chr10:56387507-56389080_+	0.0563199	1.31128	0.952183	-0.120901	-0.769275	-0.336708	-1.33435	-0.347613	-0.575308	0.694715	1	0.797598	0.98475	0.925017	0
Gja1	ENSMUSG00000050953	21154	TCAGGTGCATCTCCACGTTGACCCC	chr10:56387904-56387928_+	chr10:56387507-56389080_+	+	56443_m6a_chr10:56387507-56389080_+	2.21707	1.27574	1.40866	1.41713	1.56347	1.40365	0.502267	-0.415652	-0.0107469	0.00212891	0.0191439	0.125691	0.00201341	0.375067	0
Gja1	ENSMUSG00000050953	309322	TCTGCTTCAGGTGCATCTCCACGTT	chr10:56387910-56387934_+	chr10:56387507-56389080_+	+	56442_m6a_chr10:56387507-56389080_+	2.18373	1.0696	1.12543	0.736432	0.860864	1.55022	0.144369	-0.626252	-0.76881	0.00541407	0.202834	0.250299	0.130869	0.826182	0
Gja1	ENSMUSG00000050953	795155	TTTCAATCTGCTTCAGGTGCATCTC	chr10:56387916-56387940_+	chr10:56387507-56389080_+	+	56441_m6a_chr10:56387507-56389080_+	1.4354	1.56202	1.5633	0.944089	0.704829	0.467245	0.033446	0.275763	-0.0286665	0.0100587	1	0.00694754	0.380392	0.108666	0
Gja1	ENSMUSG00000050953	866709	TCTTGATTTCAATCTGCTTCAGGTG	chr10:56387922-56387946_+	chr10:56387507-56389080_+	+	56440_m6a_chr10:56387507-56389080_+	0.558744	1.67642	1.40837	0.223653	0.207419	-0.0489911	-0.943441	-0.434105	0.0294468	0.000574438	1	0.447428	0.986677	0.844504	0
Gja1	ENSMUSG00000050953	552591	TGAACTTCTTGATTTCAATCTGCTT	chr10:56387928-56387952_+	chr10:56387507-56389080_+	+	56439_m6a_chr10:56387507-56389080_+	0.640062		0.145203	-1.49164	-0.378056		1.25965	-0.872977	-1.62262	0.779362	1	0.901213	0.892923	0.634254	0
Gja1	ENSMUSG00000050953	633657	CATACTTGAACTTCTTGATTTCAAT	chr10:56387934-56387958_+	chr10:56387507-56389080_+	+	56438_m6a_chr10:56387507-56389080_+	0.932223		-0.348169		-0.529922	2.57627	0.80442	-1.02014		1	4.46672e-05	0.798436	0.426381	0.512632	0
Gja1	ENSMUSG00000050953	427304	CAATCCCATACTTGAACTTCTTGAT	chr10:56387940-56387964_+	chr10:56387507-56389080_+	+	56437_m6a_chr10:56387507-56389080_+	1.47152	-0.535109	1.55809	-1.17435	0.857433	0.632881	-0.178193	0.242301	-0.476437	0.000539379	1	0.662642	0.759459	0.60892	0
Gja1	ENSMUSG00000050953	663078	GTTCTTCAATCCCATACTTGAACTT	chr10:56387946-56387970_+	chr10:56387507-56389080_+	+	56436_m6a_chr10:56387507-56389080_+	0.852509	1.51761	1.54312	0.28062	0.586169	0.355255	-0.436945	-0.136	-0.331674	7.55705e-08	0.813035	0.299107	0.943591	0.939516	0
Gja1	ENSMUSG00000050953	775626	TGCCGTGTTCTTCAATCCCATACTT	chr10:56387952-56387976_+	chr10:56387507-56389080_+	+	56435_m6a_chr10:56387507-56389080_+	1.31886	1.17106	1.29434	0.676418	0.777331	0.373226	0.0465759	-0.0298903	-0.150642	1.70652e-08	0.0958048	0.0836102	0.635729	0.342302	0
Gja1	ENSMUSG00000050953	309599	TCACCTTGCCGTGTTCTTCAATCCC	chr10:56387958-56387982_+	chr10:56387507-56389080_+	+	56434_m6a_chr10:56387507-56389080_+	2.16709	0.769478	1.26693	0.393525	1.10619	1.23954	0.204648	-0.39555	-0.12607	1.49619e-07	0.00770739	0.310406	0.216492	0.568647	0
Gja1	ENSMUSG00000050953	420340	TCATCTTCACCTTGCCGTGTTCTTC	chr10:56387964-56387988_+	chr10:56387507-56389080_+	+	56433_m6a_chr10:56387507-56389080_+	2.01719	0.957945	1.41062	0.820565	1.27471	0.936013	-0.0536821	-0.0441758	-0.0131576	4.31868e-08	0.00194187	0.217097	0.0611463	0.0527258	0
Gja1	ENSMUSG00000050953	144166	CACCTCTCATCTTCACCTTGCCGTG	chr10:56387970-56387994_+	chr10:56387507-56389080_+	+	56432_m6a_chr10:56387507-56389080_+	1.81882	0.650093	0.613237	0.673326	1.09669	1.19408	0.0710189	-0.791284	-1.1142	0.00579595	0.0177814	0.61865	0.0872599	0.866737	0
Gja1	ENSMUSG00000050953	737891	GCAGGCCACCTCTCATCTTCACCTT	chr10:56387976-56388000_+	chr10:56387507-56389080_+	+	56431_m6a_chr10:56387507-56389080_+	0.866852	0.904301	0.983174	0.099114	0.339737	0.32133	-0.857699	-0.00492933	0.0848018	0.0336957	1	0.990566	0.982636	0.702053	0
Gja1	ENSMUSG00000050953	317743	TTCTCAGCAGGCCACCTCTCATCTT	chr10:56387982-56388006_+	chr10:56387507-56389080_+	+	56430_m6a_chr10:56387507-56389080_+	2.29472	1.75433	1.67002	1.66986	1.46266	1.11516	0.481971	0.166574	-0.00852369	2.22866e-05	0.0200307	0.0315104	0.0213164	0.092729	1
Gja1	ENSMUSG00000050953	91202	TGTAGGTTCTCAGCAGGCCACCTCT	chr10:56387988-56388012_+	chr10:56387507-56389080_+	+	56429_m6a_chr10:56387507-56389080_+	2.11225	0.848364	1.47224	0.719025	1.14416	1.19703	0.0286785	-0.323852	0.13354	0.00270563	0.193665	0.240389	0.069367	0.454802	0
Gja1	ENSMUSG00000050953	763275	TGATGATGTAGGTTCTCAGCAGGCC	chr10:56387994-56388018_+	chr10:56387507-56389080_+	+	56428_m6a_chr10:56387507-56389080_+	1.66881	1.63617	1.90113	1.19677	1.04581	0.716836	0.193578	0.275923	0.228817	0.00270267	0.716344	0.0103324	0.0729507	0.00304203	0
Gja1	ENSMUSG00000050953	382617	GGATGCTGATGATGTAGGTTCTCAG	chr10:56388000-56388024_+	chr10:56387507-56389080_+	+	56427_m6a_chr10:56387507-56389080_+	1.65339	1.21019	1.52308	0.991234	1.22728	0.890207	0.228	0.379507	0.0721697	0.0126824	0.437403	0.0757963	0.0315056	0.0391373	0
Gja1	ENSMUSG00000050953	127310	TGAAGAGGATGCTGATGATGTAGGT	chr10:56388006-56388030_+	chr10:56387507-56389080_+	+	56426_m6a_chr10:56387507-56389080_+	1.27542	0.431927	0.431814	-1.79785	1.01652	1.19717	-0.499364	-0.631042		0.515104	1	0.875068	0.676932	0.957788	0
Gja1	ENSMUSG00000050953	47571	CAGACTTGAAGAGGATGCTGATGAT	chr10:56388012-56388036_+	chr10:56387507-56389080_+	+	56425_m6a_chr10:56387507-56389080_+	0.518735	-0.411712	0.367102	-0.164302	-0.181052	-0.991125	-1.10979	-0.0287553		1	1	0.963413	0.971948	0.73686	0
Gja1	ENSMUSG00000050953	314577	CGAAGACAGACTTGAAGAGGATGCT	chr10:56388018-56388042_+	chr10:56387507-56389080_+	+	56424_m6a_chr10:56387507-56389080_+	0.145962	1.32112	-0.348169		-0.449353	0.798884	0.0710802	0.0611174		1	1	0.874438	0.709536	0.0115071	0
Gja1	ENSMUSG00000050953	375790	CCACCTCGAAGACAGACTTGAAGAG	chr10:56388024-56388048_+	chr10:56387507-56389080_+	+	56423_m6a_chr10:56387507-56389080_+	1.67153	1.95513	1.6223	0.825266	0.856086	0.547635	-0.0779776	0.799102	-0.0631153	0.000469044	1	0.0149868	0.23749	0.210624	0
Gja1	ENSMUSG00000050953	764723	GGAAGGCCACCTCGAAGACAGACTT	chr10:56388030-56388054_+	chr10:56387507-56389080_+	+	56422_m6a_chr10:56387507-56389080_+	0.784845	1.11923	1.48086	0.232658	0.476238	0.229594	-0.354158	0.0911676	-0.0391267	0.0221024	1	0.562524	0.974057	0.576827	0
Gja1	ENSMUSG00000050953	383509	TCAGCAGGAAGGCCACCTCGAAGAC	chr10:56388036-56388060_+	chr10:56387507-56389080_+	+	56421_m6a_chr10:56387507-56389080_+	2.10015	1.72774	1.7049	1.81376	1.27427	1.02652	0.591776	0.180725	-0.0736824	0.000156953	0.0497308	0.0168488	0.0457988	0.128384	1
Gja1	ENSMUSG00000050953	484230	ACTGGATCAGCAGGAAGGCCACCTC	chr10:56388042-56388066_+	chr10:56387507-56389080_+	+	56420_m6a_chr10:56387507-56389080_+	1.97294	1.5686	1.36929	0.867633	1.14227	1.02907	-0.246068	0.0286587	0.124524	0.00479356	0.407871	0.0584231	0.0233671	0.374648	0
Gja1	ENSMUSG00000050953	388637	TGTACCACTGGATCAGCAGGAAGGC	chr10:56388048-56388072_+	chr10:56387507-56389080_+	+	56419_m6a_chr10:56387507-56389080_+	2.27682	1.65705	1.40732	1.42683	1.38741	0.939487	0.527654	0.13657	0.188167	0.0145286	0.480605	0.0699584	0.0314088	0.050584	0
Gja1	ENSMUSG00000050953	164916	CATAGATGTACCACTGGATCAGCAG	chr10:56388054-56388078_+	chr10:56387507-56389080_+	+	56418_m6a_chr10:56387507-56389080_+	1.33032	2.02196	1.54849	1.8289	1.20704	0.447667	-0.0646434	-0.383412	0.0904036	0.00691996	0.241303	0.0740919	0.167185	0.617251	0
Gja1	ENSMUSG00000050953	20398	TGAACCCATAGATGTACCACTGGAT	chr10:56388060-56388084_+	chr10:56387507-56389080_+	+	56417_m6a_chr10:56387507-56389080_+	1.36927	0.128783	0.593682	-0.359645	1.00873	0.628537	-0.0580165	-1.86984	0.0506239	1	1	0.837012	0.686294	0.766239	0
Gja1	ENSMUSG00000050953	816871	TCAGGCTGAACCCATAGATGTACCA	chr10:56388066-56388090_+	chr10:56387507-56389080_+	+	56416_m6a_chr10:56387507-56389080_+	0.59448	0.402703	0.246852	-0.547015	-0.261659	0.278125	-0.666249	-1.05989	-1.04415	1	1	0.991239	0.962606	0.988967	0
Gja1	ENSMUSG00000050953	208983	CCGCACTCAGGCTGAACCCATAGAT	chr10:56388072-56388096_+	chr10:56387507-56389080_+	+	56415_m6a_chr10:56387507-56389080_+	1.7013	1.14455	0.890952	0.763653	1.15134	0.948972	-0.27793	-0.513257	-0.109018	0.126423	0.600931	0.382994	0.0587012	0.904673	0
Gja1	ENSMUSG00000050953	481192	TGTAGACCGCACTCAGGCTGAACCC	chr10:56388078-56388102_+	chr10:56387507-56389080_+	+	56414_m6a_chr10:56387507-56389080_+	2.10737	1.43683	1.35235	1.62184	1.30423	1.08527	0.725931	0.269833	-0.049602	0.0549042	0.392086	0.0945531	0.0243562	0.1138	0
Gja1	ENSMUSG00000050953	294748	TGCAGGTGTAGACCGCACTCAGGCT	chr10:56388084-56388108_+	chr10:56387507-56389080_+	+	56413_m6a_chr10:56387507-56389080_+	1.9564	1.02731	1.10023	1.68248	1.33898	0.900289	0.688601	0.00233665	0.105808	0.2458	0.410324	0.288277	0.0514698	0.127581	0
Gja1	ENSMUSG00000050953	503254	CTCTCTTGCAGGTGTAGACCGCACT	chr10:56388090-56388114_+	chr10:56387507-56389080_+	+	56412_m6a_chr10:56387507-56389080_+	1.47353	0.987346	1.13507	0.0757036	0.770307	0.899596	0.0821933	0.0425778	-0.0776861	0.141242	1	0.416402	0.602219	0.105451	0
Gja1	ENSMUSG00000050953	225095	AGGGATCTCTCTTGCAGGTGTAGAC	chr10:56388096-56388120_+	chr10:56387507-56389080_+	+	56411_m6a_chr10:56387507-56389080_+	1.88913	1.23814	1.30118	1.11358	1.2534	1.10378	-0.0588076	0.145131	0.113258	0.00118844	0.0573366	0.135603	0.00461508	0.0804584	0
Gja1	ENSMUSG00000050953	730108	GGGGGCAGGGATCTCTCTTGCAGGT	chr10:56388102-56388126_+	chr10:56387507-56389080_+	+	56410_m6a_chr10:56387507-56389080_+	1.21995	0.937793	0.995919	-0.0955539	0.501104	0.387331	-0.535078	-0.252685	-0.277258	0.0422398	1	0.840152	0.917701	0.955836	0
Gja1	ENSMUSG00000050953	840094	CCTGGTGGGGGCAGGGATCTCTCTT	chr10:56388108-56388132_+	chr10:56387507-56389080_+	+	56409_m6a_chr10:56387507-56389080_+	0.643224	1.11943	0.708038	-0.364021	0.0589997	-0.316368	-1.02576	-0.211825	-0.293155	0.108665	1	0.925108	0.988443	0.883885	0
Gja1	ENSMUSG00000050953	862119	AGTCCACCTGGTGGGGGCAGGGATC	chr10:56388114-56388138_+	chr10:56387507-56389080_+	+	56408_m6a_chr10:56387507-56389080_+	0.0151291	1.22375	1.05571	-0.175806	-0.43143	-0.201968	-1.32725	-0.173922	-0.205608	0.116899	1	0.799209	0.996209	0.839943	0
Gja1	ENSMUSG00000050953	595966	GGAAGCAGTCCACCTGGTGGGGGCA	chr10:56388120-56388144_+	chr10:56387507-56389080_+	+	56407_m6a_chr10:56387507-56389080_+	1.67094	1.67402	1.62512	0.372003	0.915927	0.66177	-0.232002	0.0980546	-0.0797401	4.71366e-08	0.379969	0.000514318	0.516926	0.498492	0
Gja1	ENSMUSG00000050953	41475	GTGAGAGGAAGCAGTCCACCTGGTG	chr10:56388126-56388150_+	chr10:56387507-56389080_+	+	56406_m6a_chr10:56387507-56389080_+	1.76018	0.973092	1.27755	0.361855	1.01736	0.904675	0.0330547	-0.617662	0.00275392	1.32183e-05	0.124648	0.264734	0.329407	0.688845	0
Gja1	ENSMUSG00000050953	332416	TGGGACGTGAGAGGAAGCAGTCCAC	chr10:56388132-56388156_+	chr10:56387507-56389080_+	+	56405_m6a_chr10:56387507-56389080_+	1.97387	1.47818	0.951753	0.676318	0.701434	1.32344	0.041524	-0.366669	-0.674878	0.00015448	0.150733	0.205738	0.184876	0.832813	0
Gja1	ENSMUSG00000050953	451041	TCTCCGTGGGACGTGAGAGGAAGCA	chr10:56388138-56388162_+	chr10:56387507-56389080_+	+	56404_m6a_chr10:56387507-56389080_+	1.92231	1.53592	1.38964	1.56042	1.17559	0.965221	0.700286	0.0766786	-0.252201	0.0181286	0.304857	0.0523101	0.0402696	0.23525	0
Gja1	ENSMUSG00000050953	339620	TGGTTTTCTCCGTGGGACGTGAGAG	chr10:56388144-56388168_+	chr10:56387507-56389080_+	+	56403_m6a_chr10:56387507-56389080_+	1.90587	0.851474	0.860912	0.561659	0.975447	1.18436	0.170851	-0.108853	-0.11526	0.0709003	0.511578	0.457766	0.152783	0.312731	0
Gja1	ENSMUSG00000050953	825431	TGAAGATGGTTTTCTCCGTGGGACG	chr10:56388150-56388174_+	chr10:56387507-56389080_+	+	56402_m6a_chr10:56387507-56389080_+	1.32983	1.11338	1.24904	0.585456	0.661299	0.601105	0.046133	0.139236	-0.256534	0.0596811	1	0.201055	0.892662	0.363584	0
Gja1	ENSMUSG00000050953	135957	AGATGATGAAGATGGTTTTCTCCGT	chr10:56388156-56388180_+	chr10:56387507-56389080_+	+	56401_m6a_chr10:56387507-56389080_+	0.655254		-0.240182	-0.505897	-0.0746232	0.316047	-0.246854	0.852932	0.437628	1	1	0.860661	0.955919	0.160435	0
Gja1	ENSMUSG00000050953	833315	GCATGAAGATGATGAAGATGGTTTT	chr10:56388162-56388186_+	chr10:56387507-56389080_+	+	56400_m6a_chr10:56387507-56389080_+	-0.551795	1.20577	0.40473	0.139739		-0.116043	0.811874			1	1	0.874308	0.937748	1	0
Gja1	ENSMUSG00000050953	607934	AGGACACCACCAGCATGAAGATGAT	chr10:56388174-56388198_+	chr10:56387507-56389080_+	+	56398_m6a_chr10:56387507-56389080_+	0.878703	1.52239	1.53877	0.00493533	0.402041	0.278987	-0.342864	-0.513406	-0.421407	0.121424	1	0.281716	0.966283	0.990596	0
Gja1	ENSMUSG00000050953	869960	ACACCAAGGACACCACCAGCATGAA	chr10:56388180-56388204_+	chr10:56387507-56389080_+	+	56397_m6a_chr10:56387507-56389080_+	1.40157	1.67614	1.5051	0.945124	0.296133	0.538628	-0.0634826	-0.290472	0.109061	0.0419054	1	0.0226231	0.616464	0.530489	0
Gja1	ENSMUSG00000050953	754926	CGAGAGACACCAAGGACACCACCAG	chr10:56388186-56388210_+	chr10:56387507-56389080_+	+	56396_m6a_chr10:56387507-56389080_+	1.00185	1.50912	0.720881	0.372146	0.539522	0.074564	-0.901513	-0.499925	-0.331564	1	1	0.62865	0.931574	0.952081	0
Gja1	ENSMUSG00000050953	225922	TCAGAGCGAGAGACACCAAGGACAC	chr10:56388192-56388216_+	chr10:56387507-56389080_+	+	56395_m6a_chr10:56387507-56389080_+	1.91077	1.29327	1.12165	0.632712	1.03713	0.873307	-0.0676096	-0.795524	-0.279866	0.89729	1	0.183036	0.123308	0.85568	0
Gja1	ENSMUSG00000050953	617817	TGATATTCAGAGCGAGAGACACCAA	chr10:56388198-56388222_+	chr10:56387507-56389080_+	+	56394_m6a_chr10:56387507-56389080_+	0.444778		1.90746	0.139739	0.606805	-0.361734	0.377298	0.448581		1	1	0.494786	0.900501	0.0233701	0
Gja1	ENSMUSG00000050953	584160	GCTCAATGATATTCAGAGCGAGAGA	chr10:56388204-56388228_+	chr10:56387507-56389080_+	+	56393_m6a_chr10:56387507-56389080_+	0.135346	0.671637	0.885363		0.840505		0.457686	0.70919	-2.06901	1	1	0.942553	1	0.58981	0
Gja1	ENSMUSG00000050953	792041	AGAAGAGCTCAATGATATTCAGAGC	chr10:56388210-56388234_+	chr10:56387507-56389080_+	+	56392_m6a_chr10:56387507-56389080_+	0.658292	1.15244	-1.33285		0.0484938			1.60526		1	1	0.841566	1	1	0
Gja1	ENSMUSG00000050953	641107	AGACATAGAAGAGCTCAATGATATT	chr10:56388216-56388240_+	chr10:56387507-56389080_+	+	56391_m6a_chr10:56387507-56389080_+	-1.10012	1.06142	0.777086	1.7615			0.362539			1	0.670901	0.845751	1	1	0
Gja1	ENSMUSG00000050953	837371	TGAAGAAGACATAGAAGAGCTCAAT	chr10:56388222-56388246_+	chr10:56387507-56389080_+	+	56390_m6a_chr10:56387507-56389080_+		2.33237	-1.20106	1.87755	0.364002		-0.633458			1	1	0.603967	0.325123	1	0
Gja1	ENSMUSG00000050953	651044	CGCCCTTGAAGAAGACATAGAAGAG	chr10:56388228-56388252_+	chr10:56387507-56389080_+	+	56389_m6a_chr10:56387507-56389080_+		-0.338573	1.12229	0.644927	0.175831		0.0897031	-0.131251	0.653526	1	1	0.758861	0.75826	0.179716	0
Gja1	ENSMUSG00000050953	413053	CCTTAACGCCCTTGAAGAAGACATA	chr10:56388234-56388258_+	chr10:56387507-56389080_+	+	56388_m6a_chr10:56387507-56389080_+	0.48177		1.24328	-0.180119	1.25195	-0.151507	0.573113	0.37725	-0.244656	1	1	0.713247	0.732273	0.169639	0
Gja1	ENSMUSG00000050953	332756	CGCGATCCTTAACGCCCTTGAAGAA	chr10:56388240-56388264_+	chr10:56387507-56389080_+	+	56387_m6a_chr10:56387507-56389080_+	2.04516	1.19638	1.54065	0.62378	1.04309	1.11793	0.0789363	-0.553518	-0.0469081	0.00186025	0.404625	0.11161	0.110121	0.675092	0
Gja1	ENSMUSG00000050953	369128	CCTTCACGCGATCCTTAACGCCCTT	chr10:56388246-56388270_+	chr10:56387507-56389080_+	+	56386_m6a_chr10:56387507-56389080_+	2.2924	1.731	1.72358	1.52095	1.43967	0.994762	0.526376	0.168395	0.12622	0.000302873	0.146765	0.028735	0.0280532	0.056374	1
Gja1	ENSMUSG00000050953	506328	TTCTTCCCTTCACGCGATCCTTAAC	chr10:56388252-56388276_+	chr10:56387507-56389080_+	+	56385_m6a_chr10:56387507-56389080_+	1.72379	1.09978	1.06449	0.627666	0.819361	0.962564	0.0337582	-0.820766	-0.896618	0.000388876	0.192904	0.300355	0.135904	0.878782	0
Gja1	ENSMUSG00000050953	112394	GATCGCTTCTTCCCTTCACGCGATC	chr10:56388258-56388282_+	chr10:56387507-56389080_+	+	56384_m6a_chr10:56387507-56389080_+	1.49059	0.374281	1.29698	0.346062	0.812368	0.722806	-0.147456	-0.396946	-0.149692	0.0219361	0.698992	0.610328	0.574269	0.903259	0
Gja1	ENSMUSG00000050953	692296	GGTAAGGATCGCTTCTTCCCTTCAC	chr10:56388264-56388288_+	chr10:56387507-56389080_+	+	56383_m6a_chr10:56387507-56389080_+	1.12158	1.35124	1.15526	0.802622	0.90493	0.412274	0.34694	0.0421308	0.17624	0.0181226	0.949697	0.296113	0.387146	0.0491718	0
Gja1	ENSMUSG00000050953	257655	TGGCGTGGTAAGGATCGCTTCTTCC	chr10:56388270-56388294_+	chr10:56387507-56389080_+	+	56382_m6a_chr10:56387507-56389080_+	1.60675	1.05449	0.984374	1.40714	0.883247	1.42184	0.548492	-0.159388	-0.0998132	0.00615189	0.00910026	0.409771	0.0409849	0.267841	0
Gja1	ENSMUSG00000050953	743584	CGGTGGTGGCGTGGTAAGGATCGCT	chr10:56388276-56388300_+	chr10:56387507-56389080_+	+	56381_m6a_chr10:56387507-56389080_+	1.07674	1.20293	1.11364	0.578549	0.713559	0.37871	0.185549	-0.00364692	-0.0678964	0.00166401	0.761589	0.764545	0.794948	0.143111	0
Gja1	ENSMUSG00000050953	727146	GTGGGCCGGTGGTGGCGTGGTAAGG	chr10:56388282-56388306_+	chr10:56387507-56389080_+	+	56380_m6a_chr10:56387507-56389080_+	0.778956	0.894986	0.908448	-0.327054	0.0166325	0.189374	-0.713598	-0.301305	-0.227423	0.0248587	1	0.991064	0.9779	0.924076	0
Gja1	ENSMUSG00000050953	744457	GGCTCAGTGGGCCGGTGGTGGCGTG	chr10:56388288-56388312_+	chr10:56387507-56389080_+	+	56379_m6a_chr10:56387507-56389080_+	1.14452	0.953674	0.789529	-0.0836655	0.169274	0.12708	-0.494949	-0.167111	-0.197726	0.00427486	1	0.90583	0.991335	0.911956	0
Gja1	ENSMUSG00000050953	68205	TGGATGGGCTCAGTGGGCCGGTGGT	chr10:56388294-56388318_+	chr10:56387507-56389080_+	+	56378_m6a_chr10:56387507-56389080_+	1.76943	0.74041	1.36621	0.472895	1.17181	1.00678	-0.0468567	-0.412719	-0.189956	1.71014e-06	0.0106028	0.355421	0.197706	0.846711	0
Gja1	ENSMUSG00000050953	140846	AGTCTTTGGATGGGCTCAGTGGGCC	chr10:56388300-56388324_+	chr10:56387507-56389080_+	+	56377_m6a_chr10:56387507-56389080_+	1.8185	1.57221	1.2908	0.619554	1.26206	1.08463	0.0707333	-0.0301735	0.134794	1.48734e-05	0.0669304	0.0607673	0.112931	0.056755	0
Gja1	ENSMUSG00000050953	76358	ATCCGCAGTCTTTGGATGGGCTCAG	chr10:56388306-56388330_+	chr10:56387507-56389080_+	+	56376_m6a_chr10:56387507-56389080_+	1.68625	1.1619	1.29182	1.17775	1.18869	1.14981	0.603627	0.174952	0.193443	0.415242	0.916675	0.152219	0.000252825	0.0528061	0
Gja1	ENSMUSG00000050953	753941	TTGGAGATCCGCAGTCTTTGGATGG	chr10:56388312-56388336_+	chr10:56387507-56389080_+	+	56375_m6a_chr10:56387507-56389080_+	0.27121	0.896055	0.950313	0.142427	0.0902767	0.0474648	-0.554352	0.266706	-0.0880232	1	1	0.914926	0.998819	0.578696	0
Gja1	ENSMUSG00000050953	846866	CATATTTTGGAGATCCGCAGTCTTT	chr10:56388318-56388342_+	chr10:56387507-56389080_+	+	56374_m6a_chr10:56387507-56389080_+	0.989139	1.41453	0.681468	-0.947144	0.340971	0.316047	0.295859	0.192211	-0.680908	0.855508	1	0.705821	0.890908	0.491605	0
Gja1	ENSMUSG00000050953	666707	AGTAAGCATATTTTGGAGATCCGCA	chr10:56388324-56388348_+	chr10:56387507-56389080_+	+	56373_m6a_chr10:56387507-56389080_+	0.272509	1.49009	1.38666	1.16917	-0.0387653	1.27422	-0.0983834	1.05197	0.406548	1	1	0.601593	0.382436	0.127748	0
Gja1	ENSMUSG00000050953	635069	CATTGAAGTAAGCATATTTTGGAGA	chr10:56388330-56388354_+	chr10:56387507-56389080_+	+	56372_m6a_chr10:56387507-56389080_+	-0.753748							-1.11311		1	1	1	1	1	0
Gja1	ENSMUSG00000050953	227953	AGCAGCCATTGAAGTAAGCATATTT	chr10:56388336-56388360_+	chr10:56387507-56389080_+	+	56371_m6a_chr10:56387507-56389080_+	0.153713	-1.14902	0.652975		0.26329		0.330521		1.1326	1	1	0.929826	1	0.147407	0
Gja1	ENSMUSG00000050953	259194	GTGAGGAGCAGCCATTGAAGTAAGC	chr10:56388342-56388366_+	chr10:56387507-56389080_+	+	56370_m6a_chr10:56387507-56389080_+	1.30427	1.1011	1.1058	1.33839	0.598875	0.711496	0.735214	0.554024	-0.159371	1	1	0.467039	0.215169	0.121181	0
Gja1	ENSMUSG00000050953	55306	CCGTTGGTGAGGAGCAGCCATTGAA	chr10:56388348-56388372_+	chr10:56387507-56389080_+	+	56369_m6a_chr10:56387507-56389080_+	0.876258	0.242945	0.266226	0.378494	0.84377	0.714978	0.00690227	-0.624954	-1.04715	1	1	0.961404	0.529718	0.872391	0
Gja1	ENSMUSG00000050953	584123	GTGGGGCCGTTGGTGAGGAGCAGCC	chr10:56388354-56388378_+	chr10:56387507-56389080_+	+	56368_m6a_chr10:56387507-56389080_+	1.83607	1.3245	1.24182	1.2533	1.21117	1.04007	0.620175	0.123878	-0.0814329	0.451858	1	0.122116	0.00795351	0.147664	0
Gja1	ENSMUSG00000050953	742165	GTGAGAGTGGGGCCGTTGGTGAGGA	chr10:56388360-56388384_+	chr10:56387507-56389080_+	+	56367_m6a_chr10:56387507-56389080_+	1.31085	0.933067	0.748703	0.887016	0.320128	0.873389	0.433963	-0.240126	0.00738353	0.676704	1	0.790003	0.432309	0.277033	0
Gja1	ENSMUSG00000050953	549933	ACATAGGTGAGAGTGGGGCCGTTGG	chr10:56388366-56388390_+	chr10:56387507-56389080_+	+	56366_m6a_chr10:56387507-56389080_+	1.20599	0.965491	0.922933	0.393851	0.867218	0.518846	0.456505	-0.0508563	-0.0464778	0.760478	1	0.864425	0.652448	0.186813	0
Gja1	ENSMUSG00000050953	377514	GAGGAGACATAGGTGAGAGTGGGGC	chr10:56388372-56388396_+	chr10:56387507-56389080_+	+	56365_m6a_chr10:56387507-56389080_+	1.69861	1.46793	1.14464	0.634746	1.18426	0.832029	0.194298	0.391775	0.11156	0.149249	1	0.11573	0.147258	0.0336147	0
Gja1	ENSMUSG00000050953	167513	ACCCAGGAGGAGACATAGGTGAGAG	chr10:56388378-56388402_+	chr10:56387507-56389080_+	+	56364_m6a_chr10:56387507-56389080_+	1.74691	1.35291	1.60228	0.667539	1.17952	0.872348	0.0394307	-0.83198	-0.022626	0.00927786	0.615157	0.0363359	0.118061	0.72505	0
Gja1	ENSMUSG00000050953	925718	GCTTGTACCCAGGAGGAGACATAGG	chr10:56388384-56388408_+	chr10:56387507-56389080_+	+	56363_m6a_chr10:56387507-56389080_+	-0.542534	1.07235	0.897572	-0.0939827	-1.08328	-0.166953	-1.68532	-0.0659651	-0.439809	1	1	0.844619	0.963082	0.844665	0
Gja1	ENSMUSG00000050953	598622	TGACCAGCTTGTACCCAGGAGGAGA	chr10:56388390-56388414_+	chr10:56387507-56389080_+	+	56362_m6a_chr10:56387507-56389080_+	1.17313	0.327853	0.807738	-0.23266	0.584048	0.477504	-0.274223	-1.2264	-1.25647	0.611111	1	0.875864	0.862294	0.940274	0
Gja1	ENSMUSG00000050953	404471	CACCAGTGACCAGCTTGTACCCAGG	chr10:56388396-56388420_+	chr10:56387507-56389080_+	+	56361_m6a_chr10:56387507-56389080_+	1.87706	1.29094	1.07373	0.381537	1.11789	0.657326	-0.195418	-0.492486	0.00837222	0.00220435	0.665676	0.203578	0.400793	0.800789	0
Gja1	ENSMUSG00000050953	758532	TTCTGTCACCAGTGACCAGCTTGTA	chr10:56388402-56388426_+	chr10:56387507-56389080_+	+	56360_m6a_chr10:56387507-56389080_+	0.613153	1.17379	0.462587	0.426453	0.25185	-0.0291173	-0.819981	-0.14708	-0.0631086	0.619722	1	0.902183	0.960079	0.812882	0
Gja1	ENSMUSG00000050953	39767	AATTGTTTCTGTCACCAGTGACCAG	chr10:56388408-56388432_+	chr10:56387507-56389080_+	+	56359_m6a_chr10:56387507-56389080_+	1.28712	0.552762	1.17584	0.185329	0.885281	0.870574	-0.150915	-0.917736	-0.11509	0.258675	1	0.720619	0.515864	0.828679	0
Gja1	ENSMUSG00000050953	653846	AGGAGGAATTGTTTCTGTCACCAGT	chr10:56388414-56388438_+	chr10:56387507-56389080_+	+	56358_m6a_chr10:56387507-56389080_+	1.40903	1.39564	1.49055	-0.613173	0.861043	0.762174	-0.129684	-0.307931	0.205534	0.00776478	1	0.00603065	0.71515	0.513442	0
Gja1	ENSMUSG00000050953	858737	TGCGGCAGGAGGAATTGTTTCTGTC	chr10:56388420-56388444_+	chr10:56387507-56389080_+	+	56357_m6a_chr10:56387507-56389080_+	0.716415	1.73969	1.82933	0.0179731	0.341003	0.289027	-0.853704	-0.17428	0.012532	7.12574e-06	1	0.268062	0.976096	0.791329	0
Gja1	ENSMUSG00000050953	351859	TGTAATTGCGGCAGGAGGAATTGTT	chr10:56388426-56388450_+	chr10:56387507-56389080_+	+	56356_m6a_chr10:56387507-56389080_+	1.29276	2.27401	1.45198	1.05539	0.921308	1.61745	0.374756	1.10583	-0.441523	9.12728e-05	0.0912625	0.118112	0.0633412	0.224186	0
Gja1	ENSMUSG00000050953	655692	GCTTGTTGTAATTGCGGCAGGAGGA	chr10:56388432-56388456_+	chr10:56387507-56389080_+	+	56355_m6a_chr10:56387507-56389080_+	1.4124	1.48589	1.38955	0.637404	0.74733	0.652914	-0.0656687	0.254672	0.162122	8.89545e-06	0.501767	0.00590157	0.295377	0.0929677	0
Gja1	ENSMUSG00000050953	563240	TGGCTTGCTTGTTGTAATTGCGGCA	chr10:56388438-56388462_+	chr10:56387507-56389080_+	+	56354_m6a_chr10:56387507-56389080_+	1.83484	1.44334	1.4461	0.517618	0.929203	0.940519	0.0431717	0.137076	0.155262	5.33711e-11	0.0432442	0.0436767	0.212388	0.0170085	0
Gja1	ENSMUSG00000050953	309800	GCTCGCTGGCTTGCTTGTTGTAATT	chr10:56388444-56388468_+	chr10:56387507-56389080_+	+	56353_m6a_chr10:56387507-56389080_+	1.89865	0.874569	1.15381	0.820368	1.05947	1.26348	0.234391	-0.0365069	0.040919	3.61726e-05	0.00703923	0.341104	0.0464321	0.100632	0
Gja1	ENSMUSG00000050953	612345	AGTTTTGCTCGCTGGCTTGCTTGTT	chr10:56388450-56388474_+	chr10:56387507-56389080_+	+	56352_m6a_chr10:56387507-56389080_+	1.83314	1.37952	1.25391	0.91566	1.0658	1.06803	0.467109	0.0852155	8.61983e-05	2.28204e-07	0.0118748	0.103102	0.00957707	0.108425	0
Gja1	ENSMUSG00000050953	700863	TCGCCCAGTTTTGCTCGCTGGCTTG	chr10:56388456-56388480_+	chr10:56387507-56389080_+	+	56351_m6a_chr10:56387507-56389080_+	1.30313	1.35057	1.24453	0.515198	0.754491	0.560605	0.124515	-0.0403859	-0.106267	3.58948e-06	0.338267	0.0238722	0.707484	0.223999	0
Gja1	ENSMUSG00000050953	659834	TGTAATTCGCCCAGTTTTGCTCGCT	chr10:56388462-56388486_+	chr10:56387507-56389080_+	+	56350_m6a_chr10:56387507-56389080_+	1.3149	1.40906	1.29744	0.619402	0.620723	0.487371	-0.337449	-0.00372843	0.00955582	3.09127e-06	0.433757	0.0182697	0.896808	0.61776	0
Gja1	ENSMUSG00000050953	80143	CTGCGCTGTAATTCGCCCAGTTTTG	chr10:56388468-56388492_+	chr10:56387507-56389080_+	+	56349_m6a_chr10:56387507-56389080_+	1.58014	0.521526	0.670963	0.815943	1.21919	1.11095	0.174393	-0.498517	-0.793283	0.00677745	0.00210734	0.728176	0.0415907	0.798155	0
Gja1	ENSMUSG00000050953	83882	TTTGCTCTGCGCTGTAATTCGCCCA	chr10:56388474-56388498_+	chr10:56387507-56389080_+	+	56348_m6a_chr10:56387507-56389080_+	1.78635	0.612441	1.11064	0.456201	1.17827	1.00247	0.0525218	-0.407903	-0.147245	0.000106251	0.022292	0.494104	0.207679	0.72672	0
Gja1	ENSMUSG00000050953	466904	TTCGATTTTGCTCTGCGCTGTAATT	chr10:56388480-56388504_+	chr10:56387507-56389080_+	+	56347_m6a_chr10:56387507-56389080_+	-0.0967738	1.94896	1.9389	1.18831	1.21531	0.714799	0.702176	0.32316	0.208564	0.0167092	0.290442	0.448529	0.0715587	0.0417993	0
Gja1	ENSMUSG00000050953	134518	GCCCCATTCGATTTTGCTCTGCGCT	chr10:56388486-56388510_+	chr10:56387507-56389080_+	+	56346_m6a_chr10:56387507-56389080_+	1.69281	1.22601	0.861325	1.08798	1.27254	1.20623	-0.0892662	-0.440939	-0.129995	1.53814e-05	0.000161753	0.364364	0.00507865	0.843426	0
Gja1	ENSMUSG00000050953	299832	CGGCCTGCCCCATTCGATTTTGCTC	chr10:56388492-56388516_+	chr10:56387507-56389080_+	+	56345_m6a_chr10:56387507-56389080_+	1.97333	1.19364	1.12886	1.00029	1.24379	0.934483	0.160735	0.0904284	0.120813	0.000107957	0.0378148	0.213845	0.0253087	0.00532832	0
Gja1	ENSMUSG00000050953	317215	TGCTTCCGGCCTGCCCCATTCGATT	chr10:56388498-56388522_+	chr10:56387507-56389080_+	+	56344_m6a_chr10:56387507-56389080_+	1.82191	0.760013	0.825156	0.257637	1.00942	1.18004	0.00422413	-0.235336	-0.0772729	0.000159511	0.0524818	0.529216	0.316319	0.64949	0
Gja1	ENSMUSG00000050953	354871	AGATGGTGCTTCCGGCCTGCCCCAT	chr10:56388504-56388528_+	chr10:56387507-56389080_+	+	56343_m6a_chr10:56387507-56389080_+	1.89056	1.12099	0.893369	1.05371	1.19225	0.965945	0.402952	0.0830577	0.0313017	3.72308e-05	0.00622945	0.346633	0.0122427	0.085271	0
Gja1	ENSMUSG00000050953	98696	AGTTGGAGATGGTGCTTCCGGCCTG	chr10:56388510-56388534_+	chr10:56387507-56389080_+	+	56342_m6a_chr10:56387507-56389080_+	1.83456	0.661859	1.04586	0.483452	1.18948	0.992129	-0.00328974	-0.226136	0.0442503	9.85199e-09	0.000207313	0.482984	0.193367	0.458105	0
Gja1	ENSMUSG00000050953	590999	CGTGGGAGTTGGAGATGGTGCTTCC	chr10:56388516-56388540_+	chr10:56387507-56389080_+	+	56341_m6a_chr10:56387507-56389080_+	2.04055	1.72592	1.69458	1.22715	1.26442	1.14546	0.661934	0.274549	0.102835	8.73994e-17	3.67048e-05	0.0135947	0.00199182	0.063623	1
Gja1	ENSMUSG00000050953	775556	GCTGGGCGTGGGAGTTGGAGATGGT	chr10:56388522-56388546_+	chr10:56387507-56389080_+	+	56340_m6a_chr10:56387507-56389080_+	1.22446	1.18858	1.45722	0.45571	0.762845	0.462237	0.108929	0.0856724	-0.131953	7.26785e-13	0.0520081	0.13668	0.780639	0.175556	0
Gja1	ENSMUSG00000050953	55187	CAAACGGCTGGGCGTGGGAGTTGGA	chr10:56388528-56388552_+	chr10:56387507-56389080_+	+	56339_m6a_chr10:56387507-56389080_+	1.67208	0.907929	0.95204	1.33688	1.30273	1.48154	0.533176	-0.295004	-0.64861	4.92259e-05	1.80096e-06	0.481151	0.0029017	0.565238	0
Gja1	ENSMUSG00000050953	332478	GGAAATCAAACGGCTGGGCGTGGGA	chr10:56388534-56388558_+	chr10:56387507-56389080_+	+	56338_m6a_chr10:56387507-56389080_+	2.05151	1.33133	1.20742	0.645671	0.807969	1.16581	0.299618	0.176295	-0.48165	7.90696e-10	0.00824484	0.149432	0.147728	0.400383	0
Gja1	ENSMUSG00000050953	95627	CGTCAGGGAAATCAAACGGCTGGGC	chr10:56388540-56388564_+	chr10:56387507-56389080_+	+	56337_m6a_chr10:56387507-56389080_+	1.81299	1.8354	1.67562	1.45198	1.23849	0.875264	-0.201395	-0.260904	0.0850607	2.29423e-13	2.1304e-05	0.00331314	0.0437363	0.668641	1
Gja1	ENSMUSG00000050953	127691	GGCTGTCGTCAGGGAAATCAAACGG	chr10:56388546-56388570_+	chr10:56387507-56389080_+	+	56336_m6a_chr10:56387507-56389080_+	1.64318	1.39165	1.31139	1.57091	1.20301	0.917076	-0.081827	0.107516	-0.140613	2.71522e-05	0.00189019	0.0521831	0.0469895	0.349863	0
Gja1	ENSMUSG00000050953	807964	CATTTTGGCTGTCGTCAGGGAAATC	chr10:56388552-56388576_+	chr10:56387507-56389080_+	+	56335_m6a_chr10:56387507-56389080_+	0.702782	1.05477	0.942629	-0.0462959	0.221785	0.759782	-0.320321	-0.659562	-0.509978	0.0550303	1	0.937002	0.858962	0.975288	0
Gja1	ENSMUSG00000050953	47445	TTTTGGCATTTTGGCTGTCGTCAGG	chr10:56388558-56388582_+	chr10:56387507-56389080_+	+	56334_m6a_chr10:56387507-56389080_+	1.74466	1.07918	0.958855	0.670609	1.21108	0.973737	-0.00892898	-0.13053	-0.030135	0.00110436	0.0682262	0.365187	0.100264	0.363047	0
Gja1	ENSMUSG00000050953	622003	CAACTTTTTTGGCATTTTGGCTGTC	chr10:56388564-56388588_+	chr10:56387507-56389080_+	+	56333_m6a_chr10:56387507-56389080_+	1.24082	1.86735	1.36244	-0.631413	0.703349	0.677834	-0.221195	0.45277	-0.359463	3.51009e-05	1	0.115624	0.773611	0.459261	0
Gja1	ENSMUSG00000050953	421595	CAGCAGCAACTTTTTTGGCATTTTG	chr10:56388570-56388594_+	chr10:56387507-56389080_+	+	56332_m6a_chr10:56387507-56389080_+	0.761061	-0.169145	-0.107875	1.41235	0.59166	0.0311786	-0.404252	1.56221		1	1	0.960394	0.481528	0.313927	0
Gja1	ENSMUSG00000050953	117667	CGTGTCCAGCAGCAACTTTTTTGGC	chr10:56388576-56388600_+	chr10:56387507-56389080_+	+	56331_m6a_chr10:56387507-56389080_+	1.78135	0.562744	1.27783	0.345596	0.92371	0.910107	-0.109886	-0.487942	0.0546016	0.00568244	0.47678	0.456984	0.375858	0.717029	0
Gja1	ENSMUSG00000050953	323051	GGAGTTCGTGTCCAGCAGCAACTTT	chr10:56388582-56388606_+	chr10:56387507-56389080_+	+	56330_m6a_chr10:56387507-56389080_+	2.20122	1.99288	1.75779	1.61761	1.36546	0.917656	0.437651	0.0558233	0.0216077	1.30806e-09	0.00270249	0.0117753	0.0440886	0.10479	1
Gja1	ENSMUSG00000050953	196647	AGGGCTGGAGTTCGTGTCCAGCAGC	chr10:56388588-56388612_+	chr10:56387507-56389080_+	+	56329_m6a_chr10:56387507-56389080_+	1.91345	1.6632	1.53931	1.11696	1.2352	1.32468	-0.103323	-0.0101041	0.118203	4.61387e-08	0.0010229	0.0194726	0.00551163	0.186149	2	**
Gja1	ENSMUSG00000050953	183141	TAGCTAAGGGCTGGAGTTCGTGTCC	chr10:56388594-56388618_+	chr10:56387507-56389080_+	+	56328_m6a_chr10:56387507-56389080_+	1.90132	1.30644	1.26887	1.36303	1.13584	1.39226	0.296257	-0.370083	-0.718521	8.80477e-06	0.000580511	0.125203	0.00783882	0.707899	1
Gja1	ENSMUSG00000050953	14499	CCACGATAGCTAAGGGCTGGAGTTC	chr10:56388600-56388624_+	chr10:56387507-56389080_+	+	56327_m6a_chr10:56387507-56389080_+	1.36452	0.715569	0.874877	0.411841	1.18233	0.929749	0.187725	-0.438119	-0.511569	6.17122e-06	0.00063886	0.772131	0.2513	0.751233	0
Gja1	ENSMUSG00000050953	20320	GCTGATCCACGATAGCTAAGGGCTG	chr10:56388606-56388630_+	chr10:56387507-56389080_+	+	56326_m6a_chr10:56387507-56389080_+	1.34492	0.571661	0.41875	0.19815	1.04314	0.541586	0.119818	-0.397683	0.0767188	0.00060383	0.0454135	0.84464	0.589512	0.490219	0
Gja1	ENSMUSG00000050953	153618	AAGGTCGCTGATCCACGATAGCTAA	chr10:56388612-56388636_+	chr10:56387507-56389080_+	+	56325_m6a_chr10:56387507-56389080_+	1.18687	0.602753	0.913864	0.215585	0.905515	0.722505	0.0140228	-0.576618	0.00828196	4.8234e-06	0.0168412	0.870273	0.572708	0.689003	0
Gja1	ENSMUSG00000050953	370791	TGCTGGAAGGTCGCTGATCCACGAT	chr10:56388618-56388642_+	chr10:56387507-56389080_+	+	56324_m6a_chr10:56387507-56389080_+	1.93408	1.22132	1.1385	0.75052	1.25269	0.895807	0.301735	0.0880528	0.107498	1.47245e-06	0.0252688	0.200488	0.0871147	0.0367885	0
Gja1	ENSMUSG00000050953	466622	TGGCTCTGCTGGAAGGTCGCTGATC	chr10:56388624-56388648_+	chr10:56387507-56389080_+	+	56323_m6a_chr10:56387507-56389080_+	1.88089	1.29784	1.36717	0.927797	1.24471	0.952881	0.316539	0.0820486	-0.00643676	1.98475e-08	0.00311062	0.0981859	0.0317183	0.0852748	0
Gja1	ENSMUSG00000050953	880459	GGCTGCTGGCTCTGCTGGAAGGTCG	chr10:56388630-56388654_+	chr10:56387507-56389080_+	+	56322_m6a_chr10:56387507-56389080_+	1.48037	1.29056	1.22938	0.739848	0.70519	0.510453	-0.138775	-0.0177838	0.0635746	9.39623e-09	0.0771245	0.0771763	0.527672	0.280408	0
Gja1	ENSMUSG00000050953	473668	TGGCGCGGCTGCTGGCTCTGCTGGA	chr10:56388636-56388660_+	chr10:56387507-56389080_+	+	56321_m6a_chr10:56387507-56389080_+	1.36268	0.795128	0.745052	0.512885	0.666809	0.650642	0.107021	0.113039	0.0652613	0.00788756	0.554796	0.787172	0.782583	0.00401034	0
Gja1	ENSMUSG00000050953	848701	TGCTGCTGGCGCGGCTGCTGGCTCT	chr10:56388642-56388666_+	chr10:56387507-56389080_+	+	56320_m6a_chr10:56387507-56389080_+	0.636951	0.400864	0.238238	-0.278941	0.0665369	0.454393	-0.282104	-0.491081	-0.70912	0.787679	1	0.988161	0.943724	0.962191	0
Gja1	ENSMUSG00000050953	188715	GAGGTCTGCTGCTGGCGCGGCTGCT	chr10:56388648-56388672_+	chr10:56387507-56389080_+	+	56319_m6a_chr10:56387507-56389080_+	1.74954	0.756878	1.06567	0.479668	0.90253	0.990286	0.139687	-0.0783925	-0.0320323	0.000150705	0.086105	0.468047	0.24325	0.172324	0
Gja1	ENSMUSG00000050953	807421	CAGGCCGAGGTCTGCTGCTGGCGCG	chr10:56388654-56388678_+	chr10:56387507-56389080_+	+	56318_m6a_chr10:56387507-56389080_+	1.07305	1.47762	1.64513	0.654961	0.439407	0.345579	-0.273663	0.11657	0.0648519	1.06188e-07	0.654231	0.150703	0.903857	0.385032	0
Gja1	ENSMUSG00000050953	791078	GGTCATCAGGCCGAGGTCTGCTGCT	chr10:56388660-56388684_+	chr10:56387507-56389080_+	+	56317_m6a_chr10:56387507-56389080_+	0.428741	1.51352	1.32454	0.028069	0.0920792	0.154886	-0.946232	0.0975983	-0.245061	0.000183289	1	0.578485	0.997919	0.779528	0
Gja1	ENSMUSG00000050953	448835	TCTCCAGGTCATCAGGCCGAGGTCT	chr10:56388666-56388690_+	chr10:56387507-56389080_+	+	56316_m6a_chr10:56387507-56389080_+	2.02312	1.20596	1.3328	0.633365	1.21209	0.951271	0.0195143	0.00597868	-0.134998	0.0636217	0.849228	0.147724	0.121116	0.275365	0
Gja1	ENSMUSG00000050953	795534	TTTAAATCTCCAGGTCATCAGGCCG	chr10:56388672-56388696_+	chr10:56387507-56389080_+	+	56315_m6a_chr10:56387507-56389080_+	0.965509	0.875762	0.749388	-0.275084	-0.0155426	0.437911	-0.464341	-0.61853	-0.338299	0.794969	1	0.979577	0.949995	0.980852	0
Gja1	ENSMUSG00000050953	138166	AGCCTGTTTAAATCTCCAGGTCATC	chr10:56388678-56388702_+	chr10:56387507-56389080_+	+	56314_m6a_chr10:56387507-56389080_+	1.17369	1.8314	0.611493	0.94575	0.980538	0.481469	-0.386355	-0.0376756	0.134851	0.400128	1	0.458627	0.23106	0.55673	0
Gja1	ENSMUSG00000050953	406979	TGTTCAAGCCTGTTTAAATCTCCAG	chr10:56388684-56388708_+	chr10:56387507-56389080_+	+	56313_m6a_chr10:56387507-56389080_+	0.460716	2.0143	0.186133	0.911077	1.17049	0.926486	-0.160195	0.17132		1	0.858024	0.662745	0.027216	0.361262	0
Gja1	ENSMUSG00000050953	457965	GCTTGATGTTCAAGCCTGTTTAAAT	chr10:56388690-56388714_+	chr10:56387507-56389080_+	+	56312_m6a_chr10:56387507-56389080_+	0.639575		2.13001				0.330521	1.91045		1	1	0.408368	1	0.186281	0
Gja1	ENSMUSG00000050953	579389	TTGGCAGCTTGATGTTCAAGCCTGT	chr10:56388696-56388720_+	chr10:56387507-56389080_+	+	56311_m6a_chr10:56387507-56389080_+	1.48793	2.00049	1.40885	0.475264	0.845047	0.710013	-0.00346094	-0.0333586	-0.140323	0.0893619	1	0.0637536	0.437182	0.395246	0
Gja1	ENSMUSG00000050953	12608	AATCGATTGGCAGCTTGATGTTCAA	chr10:56388702-56388726_+	chr10:56387507-56389080_+	+	56310_m6a_chr10:56387507-56389080_+	1.66933	2.39871	1.12854	1.14853	1.15662	1.21828	0.462036	0.587763	0.604987	0.488041	1	0.131335	0.000904722	0.00259278	0
Gja1	ENSMUSG00000050953	251089	CTCCACAATCGATTGGCAGCTTGAT	chr10:56388708-56388732_+	chr10:56387507-56389080_+	+	56309_m6a_chr10:56387507-56389080_+	1.84338	1.03539	1.74391	1.07874	1.14353	1.16722	0.116564	-0.342425	0.0135082	0.136357	0.708402	0.138377	0.00155956	0.497835	0
Gja1	ENSMUSG00000050953	852621	TTTCTCCTCCACAATCGATTGGCAG	chr10:56388714-56388738_+	chr10:56387507-56389080_+	+	56308_m6a_chr10:56387507-56389080_+	0.474475	1.1713	1.05151	-0.013115	-0.196418	-0.234036	-1.16676	-0.515895	-0.338368	1	1	0.828451	0.996448	0.930348	0
Gja1	ENSMUSG00000050953	16929	CTTTTTTTTCTCCTCCACAATCGAT	chr10:56388720-56388744_+	chr10:56387507-56389080_+	+	56307_m6a_chr10:56387507-56389080_+	0.79204	0.434948	0.160449	0.0757626	0.437541	0.695949	0.0513287	-0.189626	-0.165156	1	1	0.969155	0.853542	0.631493	0
Gja1	ENSMUSG00000050953	899583	AGCACCCTTTTTTTTCTCCTCCACA	chr10:56388726-56388750_+	chr10:56387507-56389080_+	+	56306_m6a_chr10:56387507-56389080_+	0.113953	1.09309	1.05484	0.018169	-0.346591	-0.366983	-0.992832	-0.204278	-0.207973	0.744386	1	0.835671	0.990385	0.86526	0
Gja1	ENSMUSG00000050953	179521	TCTGCAAGCACCCTTTTTTTTCTCC	chr10:56388732-56388756_+	chr10:56387507-56389080_+	+	56305_m6a_chr10:56387507-56389080_+	1.78687	1.09538	1.09601	1.40982	1.18373	1.47272	0.390575	-0.417298	-0.592498	0.00313341	0.00454906	0.277452	0.0077191	0.650127	0
Gja1	ENSMUSG00000050953	708597	GCACGTTCTGCAAGCACCCTTTTTT	chr10:56388738-56388762_+	chr10:56387507-56389080_+	+	56304_m6a_chr10:56387507-56389080_+	1.30385	1.22369	0.761626	0.255908	0.372831	0.706465	-0.277536	-0.584287	-0.684377	0.0291552	1	0.636377	0.871841	0.96582	0
Gja1	ENSMUSG00000050953	484480	CCAGGTGCACGTTCTGCAAGCACCC	chr10:56388744-56388768_+	chr10:56387507-56389080_+	+	56303_m6a_chr10:56387507-56389080_+	2.08057	2.08429	2.00386	1.45593	1.38223	1.03316	0.480412	0.0858989	0.27807	1.50094e-07	0.0378481	0.000431109	0.0199524	0.0450982	0
Gja1	ENSMUSG00000050953	800496	AACACCCCAGGTGCACGTTCTGCAA	chr10:56388750-56388774_+	chr10:56387507-56389080_+	+	56302_m6a_chr10:56387507-56389080_+	1.45883	1.48623	1.25908	0.745558	0.796043	0.441536	-0.0606482	-0.0387458	-0.204544	0.000695353	0.679125	0.040123	0.488447	0.68711	0
Gja1	ENSMUSG00000050953	382154	GAAATGAACACCCCAGGTGCACGTT	chr10:56388756-56388780_+	chr10:56387507-56389080_+	+	56301_m6a_chr10:56387507-56389080_+	1.99664	0.843607	1.34002	0.0113994	0.982942	1.13649	0.129987	-1.0642	-1.10262	0.000469044	0.498364	0.281613	0.447249	0.863911	0
Gja1	ENSMUSG00000050953	285473	GGGAACGAAATGAACACCCCAGGTG	chr10:56388762-56388786_+	chr10:56387507-56389080_+	+	56300_m6a_chr10:56387507-56389080_+	1.89585	1.87214	1.65953	1.09901	1.22942	0.818719	-0.22165	-0.227961	0.0891276	6.19427e-07	0.0463792	0.00664861	0.0419276	0.655766	1
Gja1	ENSMUSG00000050953	844762	CTCCACGGGAACGAAATGAACACCC	chr10:56388768-56388792_+	chr10:56387507-56389080_+	+	56299_m6a_chr10:56387507-56389080_+	0.983587	1.61854	1.65418	0.231854	0.544479	0.154207	-0.368874	-0.00148245	-0.0742388	0.000239977	1	0.181451	0.949745	0.717098	0
Gja1	ENSMUSG00000050953	450889	TACCACCTCCACGGGAACGAAATGA	chr10:56388774-56388798_+	chr10:56387507-56389080_+	+	56298_m6a_chr10:56387507-56389080_+	1.70101	1.57365	1.46782	1.42616	1.05979	0.784768	0.522723	0.13926	-0.204448	1.27203e-05	0.0373167	0.0125939	0.0725846	0.198808	0
Gja1	ENSMUSG00000050953	120048	GTTGAGTACCACCTCCACGGGAACG	chr10:56388780-56388804_+	chr10:56387507-56389080_+	+	56297_m6a_chr10:56387507-56389080_+	1.9225	1.11195	1.02396	0.387208	1.29003	1.14851	-0.200238	-0.874499	-0.066443	0.0206525	0.406229	0.288623	0.208502	0.828849	0
Gja1	ENSMUSG00000050953	156066	GAGGTTGTTGAGTACCACCTCCACG	chr10:56388786-56388810_+	chr10:56387507-56389080_+	+	56296_m6a_chr10:56387507-56389080_+	1.79321	1.58707	1.09269	1.45287	1.12133	0.84097	-0.228251	-0.323654	0.142727	0.000368036	0.0363877	0.128227	0.0563912	0.653206	0
Gja1	ENSMUSG00000050953	470499	ATTACTGAGGTTGTTGAGTACCACC	chr10:56388792-56388816_+	chr10:56387507-56389080_+	+	56295_m6a_chr10:56387507-56389080_+	1.47152	2.11981	2.32944	1.95442	1.41758	0.707496	0.693804	-0.165845	0.0479944	3.99682e-06	0.0244764	0.0442363	0.0955908	0.20747	0
Gja1	ENSMUSG00000050953	250666	CGCCTCATTACTGAGGTTGTTGAGT	chr10:56388798-56388822_+	chr10:56387507-56389080_+	+	56294_m6a_chr10:56387507-56389080_+	1.65922	1.46071	1.50853	1.08328	0.943524	1.61756	0.479135	0.00388727	-1.36893	1	1	0.0120267	0.0565974	0.637241	0
Gja1	ENSMUSG00000050953	502097	TTTCTACGCCTCATTACTGAGGTTG	chr10:56388804-56388828_+	chr10:56387507-56389080_+	+	56293_m6a_chr10:56387507-56389080_+	2.10501	2.54895	1.50089	1.68328	0.983409	0.351941	0.877501	0.433508	0.631615	1	1	0.0499408	0.230045	0.015218	0
Gja1	ENSMUSG00000050953	370626	CTTTGTTTTCTACGCCTCATTACTG	chr10:56388810-56388834_+	chr10:56387507-56389080_+	+	56292_m6a_chr10:56387507-56389080_+	1.3773	1.3976	1.66539	0.950745	0.979481	0.593753	0.0435451	0.137327	0.433311	1	1	0.0382702	0.138237	0.0714501	0
Gja1	ENSMUSG00000050953	705522	TAATGTCTTTGTTTTCTACGCCTCA	chr10:56388816-56388840_+	chr10:56387507-56389080_+	+	56291_m6a_chr10:56387507-56389080_+	1.11589	1.72812	1.89056	-0.126934	0.108897	0.845242	-0.151444	-0.195267	-0.00671465	1	1	0.110628	0.838896	0.748615	0
Gja1	ENSMUSG00000050953	152150	ATATTGTAATGTCTTTGTTTTCTAC	chr10:56388822-56388846_+	chr10:56387507-56389080_+	+	56290_m6a_chr10:56387507-56389080_+	-0.200396					-0.521909	2.59134	1.60526		1	1	1	1	0.0711172	0
Gja1	ENSMUSG00000050953	192766	ACCTAGATATTGTAATGTCTTTGTT	chr10:56388828-56388852_+	chr10:56387507-56389080_+	+	56289_m6a_chr10:56387507-56389080_+	0.153291			1.28591	-0.705733		1.69074	2.39308		1	1	1	0.612489	0.0524094	0
Gja1	ENSMUSG00000050953	767258	CAAGGAACCTAGATATTGTAATGTC	chr10:56388834-56388858_+	chr10:56387507-56389080_+	+	56288_m6a_chr10:56387507-56389080_+	0.932453	0.851657			0.187235	0.950344	0.14822	2.19677		1	1	0.953081	0.572657	0.219245	0
Gja1	ENSMUSG00000050953	493943	ACCCCCCAAGGAACCTAGATATTGT	chr10:56388840-56388864_+	chr10:56387507-56389080_+	+	56287_m6a_chr10:56387507-56389080_+	1.92324	0.78772	1.04175	0.500004	0.709027	1.02269	0.156419	-0.822782	-0.806312	1	1	0.412228	0.313266	0.837703	0
Gja1	ENSMUSG00000050953	208956	CAAAACACCCCCCAAGGAACCTAGA	chr10:56388846-56388870_+	chr10:56387507-56389080_+	+	56286_m6a_chr10:56387507-56389080_+	1.99995	1.31602	1.18981	1.08144	1.14154	1.11772	-0.175521	-0.41642	0.0689175	1	1	0.155799	0.000732038	0.730099	0
Gja1	ENSMUSG00000050953	622103	CTATCCCAAAACACCCCCCAAGGAA	chr10:56388852-56388876_+	chr10:56387507-56389080_+	+	56285_m6a_chr10:56387507-56389080_+	1.55168	1.27647	1.21325	0.179284	0.548509	0.655461	-0.147988	-0.440479	-0.715116	1	1	0.110111	0.846735	0.921496	0
Gja1	ENSMUSG00000050953	36641	GCCTAGCTATCCCAAAACACCCCCC	chr10:56388858-56388882_+	chr10:56387507-56389080_+	+	56284_m6a_chr10:56387507-56389080_+	1.92062	1.00372	0.715269	0.64613	1.42398	1.31932	-0.0292109	-0.413366	0.218403	0.288381	0.499296	0.452475	0.0960884	0.505942	0
Gja1	ENSMUSG00000050953	231851	TTTGCCGCCTAGCTATCCCAAAACA	chr10:56388864-56388888_+	chr10:56387507-56389080_+	+	56283_m6a_chr10:56387507-56389080_+	2.0857	1.17092	1.42057	1.17203	1.33814	1.15106	-0.0298669	-0.310446	0.0769477	7.58743e-09	6.51909e-05	0.142466	0.00543461	0.549196	0
Gja1	ENSMUSG00000050953	342272	CCTACTTTTGCCGCCTAGCTATCCC	chr10:56388870-56388894_+	chr10:56387507-56389080_+	+	56282_m6a_chr10:56387507-56389080_+	2.35079	1.28759	1.64591	1.36069	1.4445	1.32597	0.0323225	-0.10017	0.183763	2.25608e-16	3.50942e-09	0.0979745	0.00119078	0.155505	0
Gja1	ENSMUSG00000050953	326065	CCTTTCCCTACTTTTGCCGCCTAGC	chr10:56388876-56388900_+	chr10:56387507-56389080_+	+	56281_m6a_chr10:56387507-56389080_+	2.28858	1.17783	1.57876	0.963167	1.41093	1.43465	0.038219	-0.0289583	0.0992662	7.06499e-15	1.08042e-07	0.126005	0.0287058	0.0502489	0
Gja1	ENSMUSG00000050953	737727	ACCTCCCCTTTCCCTACTTTTGCCG	chr10:56388882-56388906_+	chr10:56387507-56389080_+	+	56280_m6a_chr10:56387507-56389080_+	0.718793	1.11204	1.01149	0.131605	0.355557	0.580601	-0.471239	0.00314919	0.114971	3.82235e-09	0.351626	0.896207	0.92724	0.589193	0
Gja1	ENSMUSG00000050953	510930	TTACATACCTCCCCTTTCCCTACTT	chr10:56388888-56388912_+	chr10:56387507-56389080_+	+	56279_m6a_chr10:56387507-56389080_+	1.8936	1.23867	1.14655	1.21959	1.17967	1.05977	0.444289	0.228748	0.0936487	0.602609	1	0.190491	0.00462997	0.0425651	0
Gja1	ENSMUSG00000050953	573878	ATACCGTTACATACCTCCCCTTTCC	chr10:56388894-56388918_+	chr10:56387507-56389080_+	+	56278_m6a_chr10:56387507-56389080_+	1.76072	1.07127	1.12184	0.33336	0.893355	1.06168	0.0546528	-0.254667	-0.415253	0.780779	1	0.279922	0.339707	0.782373	0
Gja1	ENSMUSG00000050953	139616	CATTAAATACCGTTACATACCTCCC	chr10:56388900-56388924_+	chr10:56387507-56389080_+	+	56277_m6a_chr10:56387507-56389080_+	1.35321	1.4692	1.02506	0.450097	0.986764	0.773656	-0.224263	-0.0584281	-0.243367	1	1	0.233717	0.330671	0.890303	0
Gja1	ENSMUSG00000050953	731495	CTTCTACATTAAATACCGTTACATA	chr10:56388906-56388930_+	chr10:56387507-56389080_+	+	56276_m6a_chr10:56387507-56389080_+	-0.117239			-0.454788	-0.186873	-1.66194	0.566785	1.08986	-1.84877	1	1	1	0.955935	0.497034	0
Gja1	ENSMUSG00000050953	426342	TTGAATCTTCTACATTAAATACCGT	chr10:56388912-56388936_+	chr10:56387507-56389080_+	+	56275_m6a_chr10:56387507-56389080_+	-0.203048	0.937753	1.03352	1.51371		-0.244433	1.58779			1	1	0.857578	0.508249	1	0
Gja1	ENSMUSG00000050953	491348	AGCTCTTTGAATCTTCTACATTAAA	chr10:56388918-56388942_+	chr10:56387507-56389080_+	+	56274_m6a_chr10:56387507-56389080_+	2.1246		0.066417		0.890347		0.362539	1.60526	-0.0727772	1	1	0.521196	1	0.148374	0
Gja1	ENSMUSG00000050953	474934	AATTTAAGCTCTTTGAATCTTCTAC	chr10:56388924-56388948_+	chr10:56387507-56389080_+	+	56273_m6a_chr10:56387507-56389080_+	0.145962		2.61461	-0.953629	-0.068593	1.46867	0.6072	0.0611174	1.2937	1	1	0.444818	0.726533	0.0894129	0
Gja1	ENSMUSG00000050953	468457	TACTAGAATTTAAGCTCTTTGAATC	chr10:56388930-56388954_+	chr10:56387507-56389080_+	+	56272_m6a_chr10:56387507-56389080_+	0.275786	-0.169145			0.187235	-1.66194	0.20499	0.495331		1	1	0.937084	0.813666	0.105511	0
Gja1	ENSMUSG00000050953	420862	GACTCTTACTAGAATTTAAGCTCTT	chr10:56388936-56388960_+	chr10:56387507-56389080_+	+	56271_m6a_chr10:56387507-56389080_+	-0.333494			-0.663791	1.03122	-0.0236837	-0.0789954		-1.62262	1	1	1	0.806721	0.75151	0
Gja1	ENSMUSG00000050953	708378	CAATGAGACTCTTACTAGAATTTAA	chr10:56388942-56388966_+	chr10:56387507-56389080_+	+	56270_m6a_chr10:56387507-56389080_+	1.06203		-0.494542	0.873726		0.340466	-0.724035	1.96423		1	1	0.769569	0.559387	0.348712	0
Gja1	ENSMUSG00000050953	161342	TTCATCCAATGAGACTCTTACTAGA	chr10:56388948-56388972_+	chr10:56387507-56389080_+	+	56269_m6a_chr10:56387507-56389080_+	0.804098	2.72293		0.708388	0.268801	-2.53108	-1.20191	0.495331	-0.818755	0.104257	1	0.322254	0.816861	0.757562	0
Gja1	ENSMUSG00000050953	554114	CTATGTTTCATCCAATGAGACTCTT	chr10:56388954-56388978_+	chr10:56387507-56389080_+	+	56268_m6a_chr10:56387507-56389080_+	0.40117	0.534558	-0.0997366	-0.401447	0.889988	2.24875	0.0975623	-2.03977	-0.244656	1	1	0.977798	0.385309	0.787074	0
Gja1	ENSMUSG00000050953	730753	CCCTATCTATGTTTCATCCAATGAG	chr10:56388960-56388984_+	chr10:56387507-56389080_+	+	56267_m6a_chr10:56387507-56389080_+	0.278769	1.01143	0.832656	-2.42129	0.00899498	0.640326	-1.21812	-0.418564	1.04137	1	1	0.912845	0.843537	0.56716	0
Gja1	ENSMUSG00000050953	709570	AGAAAGCCCTATCTATGTTTCATCC	chr10:56388966-56388990_+	chr10:56387507-56389080_+	+	56266_m6a_chr10:56387507-56389080_+	1.00384	1.92934	1.94725	0.431413	0.428532	0.425664	-0.670977	0.45243	0.0772931	0.0495576	1	0.137903	0.999974	0.473749	0
Gja1	ENSMUSG00000050953	580299	AGAGAGAGAAAGCCCTATCTATGTT	chr10:56388972-56388996_+	chr10:56387507-56389080_+	+	56265_m6a_chr10:56387507-56389080_+	0.719328	0.102697	-0.490963	0.831059	0.349339	0.478412	0.342625	0.987979	0.418992	1	1	0.952702	0.728297	0.0422881	0
Gja1	ENSMUSG00000050953	303979	GGGGGCAGAGAGAGAAAGCCCTATC	chr10:56388978-56389002_+	chr10:56387507-56389080_+	+	56264_m6a_chr10:56387507-56389080_+	1.97473	0.934778	0.81572	0.574795	0.771158	1.18641	0.0726841	-0.620235	-1.09762	0.220075	0.971982	0.426275	0.204606	0.852179	0
Gja1	ENSMUSG00000050953	27084	CAGTTGGGGGGCAGAGAGAGAAAGC	chr10:56388984-56389008_+	chr10:56387507-56389080_+	+	56263_m6a_chr10:56387507-56389080_+	0.771719	0.958476	0.781986	0.245142	0.614813	-0.1461	0.0154146	0.350392	0.487912	1	1	0.983633	0.901797	0.0632016	0
Gja1	ENSMUSG00000050953	529799	AAGGTTCAGTTGGGGGGCAGAGAGA	chr10:56388990-56389014_+	chr10:56387507-56389080_+	+	56262_m6a_chr10:56387507-56389080_+	0.931833	0.818151	1.29011	0.388054	0.468452	0.309347	0.248004	0.192832	0.371885	0.886942	1	0.799916	0.986012	0.0115318	0
Gja1	ENSMUSG00000050953	732163	ATTCTTAAGGTTCAGTTGGGGGGCA	chr10:56388996-56389020_+	chr10:56387507-56389080_+	+	56261_m6a_chr10:56387507-56389080_+	-0.233664	0.806089	1.36536	0.259061	-0.4225	0.000222034	0.0230504	0.681918	0.884086	1	1	0.80804	0.965094	0.0734082	0
Gja1	ENSMUSG00000050953	138077	AGAACCATTCTTAAGGTTCAGTTGG	chr10:56389002-56389026_+	chr10:56387507-56389080_+	+	56260_m6a_chr10:56387507-56389080_+	0.229349		1.79263		-0.993776			-0.803853	0.122563	0.252914	1	0.561587	1	0.667478	0
Gja1	ENSMUSG00000050953	863942	GTATACAGAACCATTCTTAAGGTTC	chr10:56389008-56389032_+	chr10:56387507-56389080_+	+	56259_m6a_chr10:56387507-56389080_+	2.10064	0.189559	1.30441		0.680326		0.156611	0.628894	0.0267821	0.0792836	1	0.478289	1	0.10108	0
Gja1	ENSMUSG00000050953	262158	ACTCATGTATACAGAACCATTCTTA	chr10:56389014-56389038_+	chr10:56387507-56389080_+	+	56258_m6a_chr10:56387507-56389080_+	0.915723	-0.0322373	1.47573		0.494206	-0.705547	-0.355682			0.354975	1	0.759417	0.787938	1	0
Gja1	ENSMUSG00000050953	427790	CCACTCACTCATGTATACAGAACCA	chr10:56389020-56389044_+	chr10:56387507-56389080_+	+	56257_m6a_chr10:56387507-56389080_+	1.27441	1.09687	1.60768	1.21853	1.31341	0.441057	0.35628	0.183559	-0.303231	0.570095	1	0.195968	0.175387	0.26277	0
Gja1	ENSMUSG00000050953	14214	TATCACCCACTCACTCATGTATACA	chr10:56389026-56389050_+	chr10:56387507-56389080_+	+	56256_m6a_chr10:56387507-56389080_+	1.68504	1.21779	1.45834	2.02384	1.37889	1.41564	0.821298	-0.0630165	0.0548238	0.794476	0.662727	0.0824657	0.0226569	0.170954	0
Gja1	ENSMUSG00000050953	611744	AATATATATCACCCACTCACTCATG	chr10:56389032-56389056_+	chr10:56387507-56389080_+	+	56255_m6a_chr10:56387507-56389080_+	0.853274	1.40602	1.4018	1.19089	0.666578	0.628365	-0.361415	0.189278	0.04819	0.752801	1	0.394146	0.222551	0.435631	0
Gja1	ENSMUSG00000050953	581434	AAAAAAAATATATATCACCCACTCA	chr10:56389038-56389062_+	chr10:56387507-56389080_+	+	56254_m6a_chr10:56387507-56389080_+	-0.423634	0.0498475	-0.338134	0.287331	0.0790525	-0.160058	0.684561	-0.256242	-0.538517	1	1	0.994683	0.977508	0.466699	0
Gja1	ENSMUSG00000050953	545086	AAAATTAAAAAAAATATATATCACC	chr10:56389044-56389068_+	chr10:56387507-56389080_+	+	56253_m6a_chr10:56387507-56389080_+		0.851657	0.613755	0.35736	-0.470394	-0.587043	-1.48667			1	1	0.914365	0.952172	1	0
Gja1	ENSMUSG00000050953	815171	AAAACAAAAATTAAAAAAAATATAT	chr10:56389050-56389074_+	chr10:56387507-56389080_+	+	56252_m6a_chr10:56387507-56389080_+		0.189559		-0.233352	-0.0223304	-0.705547	0.14822	1.38353		1	1	1	0.979943	0.202269	0
Gja1	ENSMUSG00000050953	526757	CTCAGTAAAACAAAAATTAAAAAAA	chr10:56389056-56389080_+	chr10:56387507-56389080_+	+	56251_m6a_chr10:56387507-56389080_+				0.75656		0.0186551	0.330904	-1.23488		1	1	1	0.700992	0.643955	0
Nuak1	ENSMUSG00000020032	733138	CTCTGCGTGGGAGCTTTGGGTGGGG	chr10:84375417-84375441_-	chr10:84373773-84375445_-	-	87409_m6a_chr10:84373773-84375445_-	-0.0958798	0.902175	0.707125	0.277875	-0.0713316	-0.81938	0.439483	0.745042	0.829911	1	1	0.63377	0.923681	0.0145829	0
Nuak1	ENSMUSG00000020032	73959	ATCAGGCTCTGCGTGGGAGCTTTGG	chr10:84375411-84375435_-	chr10:84373773-84375445_-	-	87408_m6a_chr10:84373773-84375445_-	0.537422			-0.953629	0.00950123	0.640326	0.926678			1	1	1	0.845739	1	0
Nuak1	ENSMUSG00000020032	445406	AAGAGAATCAGGCTCTGCGTGGGAG	chr10:84375405-84375429_-	chr10:84373773-84375445_-	-	87407_m6a_chr10:84373773-84375445_-	0.268996		0.422905	-0.401447	-0.113931	-0.967432	-1.30868		-0.430997	1	1	0.914172	0.972298	0.850166	0
Nuak1	ENSMUSG00000020032	588172	AAGACAAAGAGAATCAGGCTCTGCG	chr10:84375399-84375423_-	chr10:84373773-84375445_-	-	87406_m6a_chr10:84373773-84375445_-	0.628714	-0.868477		-0.120577	0.330042				0.765939	1	1	0.74908	0.843702	1	0
Nuak1	ENSMUSG00000020032	663161	GGGTGAAAGACAAAGAGAATCAGGC	chr10:84375393-84375417_-	chr10:84373773-84375445_-	-	87405_m6a_chr10:84373773-84375445_-		-0.868477		0.139739	-0.0790454		-0.103445	0.253049		1	1	1	0.930871	0.362382	0
Nuak1	ENSMUSG00000020032	451816	TCTAAGGGGTGAAAGACAAAGAGAA	chr10:84375387-84375411_-	chr10:84373773-84375445_-	-	87404_m6a_chr10:84373773-84375445_-	-0.624456				0.796661	-1.66194	0.239463	-0.631042	-0.430997	1	1	1	0.710839	0.791218	0
Nuak1	ENSMUSG00000020032	812703	CGAGCATCTAAGGGGTGAAAGACAA	chr10:84375381-84375405_-	chr10:84373773-84375445_-	-	87403_m6a_chr10:84373773-84375445_-		0.189559	0.946512	0.873726		-0.796904	0.156611	-1.43678	1.02799	1	1	0.547059	0.668213	0.537429	0
Nuak1	ENSMUSG00000020032	119974	AGTCCCCGAGCATCTAAGGGGTGAA	chr10:84375375-84375399_-	chr10:84373773-84375445_-	-	87402_m6a_chr10:84373773-84375445_-	0.403215	0.0593423	-0.338134	0.578963	0.0411169	0.42055	0.351509	1.78089		1	1	0.943672	0.810963	0.186946	0
Nuak1	ENSMUSG00000020032	497402	CGGATGAGTCCCCGAGCATCTAAGG	chr10:84375369-84375393_-	chr10:84373773-84375445_-	-	87401_m6a_chr10:84373773-84375445_-	0.854347	1.52247	-0.151681	0.301524	0.106788	0.744518	-0.0274336	-2.85311	-0.598746	1	1	0.415968	0.734664	0.843343	0
Nuak1	ENSMUSG00000020032	590382	ATCCACCGGATGAGTCCCCGAGCAT	chr10:84375363-84375387_-	chr10:84373773-84375445_-	-	87400_m6a_chr10:84373773-84375445_-	0.760322	1.28191	0.962165	0.346602	0.500225	1.23064	-0.0491008	-0.00855987	-1.49553	1	1	0.0655199	0.301935	0.796854	0
Nuak1	ENSMUSG00000020032	260336	ATCAGCATCCACCGGATGAGTCCCC	chr10:84375357-84375381_-	chr10:84373773-84375445_-	-	87399_m6a_chr10:84373773-84375445_-	1.31635	0.471843	1.15438	0.957156	0.918293	1.20191	0.0290911	-0.148626	-0.717326	1	1	0.151124	0.0150717	0.82445	0
Nuak1	ENSMUSG00000020032	480151	TTCACCATCAGCATCCACCGGATGA	chr10:84375351-84375375_-	chr10:84373773-84375445_-	-	87398_m6a_chr10:84373773-84375445_-	0.318505	-0.346203	0.636788	-0.812236	0.491481	0.552833	0.0782465	-0.496136	-0.939779	1	1	0.858557	0.790224	0.864989	0
Nuak1	ENSMUSG00000020032	246422	TCGGGATTCACCATCAGCATCCACC	chr10:84375345-84375369_-	chr10:84373773-84375445_-	-	87397_m6a_chr10:84373773-84375445_-	0.718813	1.22562	0.722908	1.02773	0.663981	0.692633	-0.121275	0.226844	-0.57189	0.496055	0.809583	0.12815	0.0740254	0.706167	0
Nuak1	ENSMUSG00000020032	371513	CTGCGATCGGGATTCACCATCAGCA	chr10:84375339-84375363_-	chr10:84373773-84375445_-	-	87396_m6a_chr10:84373773-84375445_-	1.63664	1.09082	0.286703	0.316181	1.144	1.38337	0.138717	-0.560868	-1.70316	0.0124503	0.0411305	0.217176	0.160993	0.839201	0
Nuak1	ENSMUSG00000020032	4558	GTGGCTCTGCGATCGGGATTCACCA	chr10:84375333-84375357_-	chr10:84373773-84375445_-	-	87395_m6a_chr10:84373773-84375445_-	1.29412	0.908056	0.738244	0.800117	1.59772	1.99562	0.440328	0.332296	-0.292929	0.217731	0.00426788	0.08151	0.0581609	0.270109	0
Nuak1	ENSMUSG00000020032	910668	TCGATGGTGGCTCTGCGATCGGGAT	chr10:84375327-84375351_-	chr10:84373773-84375445_-	-	87394_m6a_chr10:84373773-84375445_-	1.30853	1.92462	0.9978	1.13165	0.988181	0.777785	0.092273	-0.176933	0.229815	0.00816388	0.336139	0.0510181	0.0252505	0.343085	0
Nuak1	ENSMUSG00000020032	179594	ATGTCCTCGATGGTGGCTCTGCGAT	chr10:84375321-84375345_-	chr10:84373773-84375445_-	-	87393_m6a_chr10:84373773-84375445_-	0.906385	0.446194	0.535549	0.78626	0.731115	1.29201	0.225914	-0.201744	-0.773306	0.989329	0.353949	0.487519	0.0741196	0.754661	0
Nuak1	ENSMUSG00000020032	10944	TTGGCGATGTCCTCGATGGTGGCTC	chr10:84375315-84375339_-	chr10:84373773-84375445_-	-	87392_m6a_chr10:84373773-84375445_-	0.92884	0.43407	0.299359	0.717293	0.867685	1.35603	0.264948	-0.392107	-0.630811	1	0.763136	0.625726	0.0713033	0.771727	0
Nuak1	ENSMUSG00000020032	75495	CAATGGTTGGCGATGTCCTCGATGG	chr10:84375309-84375333_-	chr10:84373773-84375445_-	-	87391_m6a_chr10:84373773-84375445_-	1.07637	0.483065	0.597846	0.577036	0.995742	1.61405	-0.0178099	0.739075	0.157643	1	1	0.3271	0.10851	0.159743	0
Nuak1	ENSMUSG00000020032	607125	ACCCACCAATGGTTGGCGATGTCCT	chr10:84375303-84375327_-	chr10:84373773-84375445_-	-	87390_m6a_chr10:84373773-84375445_-	1.28345	1.34861	1.5869	1.46409	1.27165	1.06518	0.590473	0.250551	0.271283	0.44652	0.818554	0.00681463	0.0116634	0.0375951	0
Nuak1	ENSMUSG00000020032	424278	CAGTTCACCCACCAATGGTTGGCGA	chr10:84375297-84375321_-	chr10:84373773-84375445_-	-	87389_m6a_chr10:84373773-84375445_-	1.62174	1.66007	2.46929	1.74503	1.56897	0.817988	0.715323	0.139507	0.39456	0.0502248	0.71845	0.0213964	0.0478807	0.0629553	1
Nuak1	ENSMUSG00000020032	728199	TAGCCCCAGTTCACCCACCAATGGT	chr10:84375291-84375315_-	chr10:84373773-84375445_-	-	87388_m6a_chr10:84373773-84375445_-	-0.115816	-0.0657512	-0.891576	-0.323397	0.0530361	0.0965376	-0.452669	-1.17441	-1.2176	1	1	0.966623	0.975821	0.968481	0
Nuak1	ENSMUSG00000020032	415304	CTCTTGTAGCCCCAGTTCACCCACC	chr10:84375285-84375309_-	chr10:84373773-84375445_-	-	87387_m6a_chr10:84373773-84375445_-	1.01567	0.920788	1.06425	0.789847	0.712706	0.417802	0.584842	0.559632	0.302412	1	1	0.00616596	0.210232	0.0161557	0
Nuak1	ENSMUSG00000020032	400488	ACGCTGCTCTTGTAGCCCCAGTTCA	chr10:84375279-84375303_-	chr10:84373773-84375445_-	-	87386_m6a_chr10:84373773-84375445_-	0.957987	0.574384	0.693113	0.496791	0.90235	1.24898	0.281462	-0.0129611	-0.0425513	1	1	0.204583	0.121284	0.253758	0
Nuak1	ENSMUSG00000020032	926528	TCACAGACGCTGCTCTTGTAGCCCC	chr10:84375273-84375297_-	chr10:84373773-84375445_-	-	87385_m6a_chr10:84373773-84375445_-	1.07232	1.16961	1.32993	0.465557	0.499304	0.666537	-0.161126	0.54775	0.420459	1	1	0.00857104	0.401305	0.166343	0
Nuak1	ENSMUSG00000020032	936636	TCACAGTCACAGACGCTGCTCTTGT	chr10:84375267-84375291_-	chr10:84373773-84375445_-	-	87384_m6a_chr10:84373773-84375445_-	-0.554085	-0.0386173	0.601198	0.148938	-1.47044	1.06996	-1.74513	-1.15093	-0.122962	1	1	0.898032	0.751136	0.915224	0
Nuak1	ENSMUSG00000020032	110873	AGGGCATCACAGTCACAGACGCTGC	chr10:84375261-84375285_-	chr10:84373773-84375445_-	-	87383_m6a_chr10:84373773-84375445_-	1.19293	0.368878	0.834299	0.772987	1.05287	0.874447	0.417995	-0.177834	-0.141071	1	0.87761	0.270489	0.0223323	0.426563	0
Nuak1	ENSMUSG00000020032	451213	TCAGGAAGGGCATCACAGTCACAGA	chr10:84375255-84375279_-	chr10:84373773-84375445_-	-	87382_m6a_chr10:84373773-84375445_-	0.36989		-2.62883	0.119333	0.158567	1.01214	0.184164	-0.720076	-0.76047	1	1	0.774852	0.613585	0.848833	0
Nuak1	ENSMUSG00000020032	51511	TCAGAGTCAGGAAGGGCATCACAGT	chr10:84375249-84375273_-	chr10:84373773-84375445_-	-	87381_m6a_chr10:84373773-84375445_-	0.69153	-0.0969684	0.652975	0.673793	0.225289	0.0197722	0.00674347	0.0923605	-0.583984	1	1	0.749106	0.813529	0.72813	0
Nuak1	ENSMUSG00000020032	785818	GGAGACTCAGAGTCAGGAAGGGCAT	chr10:84375243-84375267_-	chr10:84373773-84375445_-	-	87380_m6a_chr10:84373773-84375445_-		-0.169145	2.61461	0.957687	0.0433936	-0.0588489	-0.372804	-1.9759	0.653526	0.150354	1	0.370769	0.710429	0.729043	0
Nuak1	ENSMUSG00000020032	509746	AAGAGTGGAGACTCAGAGTCAGGAA	chr10:84375237-84375261_-	chr10:84373773-84375445_-	-	87379_m6a_chr10:84373773-84375445_-	-0.0787952		-0.494542		-1.49251		-0.633458	0.0611174		1	1	0.928595	1	0.715273	0
Nuak1	ENSMUSG00000020032	887004	CGTGCCAAGAGTGGAGACTCAGAGT	chr10:84375231-84375255_-	chr10:84373773-84375445_-	-	87378_m6a_chr10:84373773-84375445_-	-0.200396	0.610342	1.04006	-0.0755509	0.620674	-0.244433	-0.562521	0.507645	0.883908	1	1	0.632256	0.875513	0.289864	0
Nuak1	ENSMUSG00000020032	12669	ATGATCCGTGCCAAGAGTGGAGACT	chr10:84375225-84375249_-	chr10:84373773-84375445_-	-	87377_m6a_chr10:84373773-84375445_-	0.970471	0.825733	-0.3723	0.373266	1.03948	1.03745	0.361574	-1.09589	-2.18794	1	0.577245	0.620752	0.160123	0.839629	0
Nuak1	ENSMUSG00000020032	911797	CAATCGATGATCCGTGCCAAGAGTG	chr10:84375219-84375243_-	chr10:84373773-84375445_-	-	87376_m6a_chr10:84373773-84375445_-	-0.747231	-0.683232	0.881805	0.564486	-1.58442	-0.0908731	-0.672033	-0.650905	-0.680908	1	1	0.865565	0.852985	0.999909	0
Nuak1	ENSMUSG00000020032	556189	TGATGCCAATCGATGATCCGTGCCA	chr10:84375213-84375237_-	chr10:84373773-84375445_-	-	87375_m6a_chr10:84373773-84375445_-	1.17474	0.508653	0.89931	0.446037	0.94511	0.926389	-0.0464947	-0.331964	0.19386	0.640576	0.935239	0.172806	0.135212	0.62201	0
Nuak1	ENSMUSG00000020032	632137	GAACGGTGATGCCAATCGATGATCC	chr10:84375207-84375231_-	chr10:84373773-84375445_-	-	87374_m6a_chr10:84373773-84375445_-	0.550102	0.174631	0.598788	8.26867	0.883381	1.24259	0.4556	-0.749897	-0.626628	1	2.85615e-11	0.847535	0.173034	0.74199	0
Nuak1	ENSMUSG00000020032	256752	CCCGTGGAACGGTGATGCCAATCGA	chr10:84375201-84375225_-	chr10:84373773-84375445_-	-	87373_m6a_chr10:84373773-84375445_-	1.22168	-0.0598242	1.07854	0.992924	1.26005	1.41835	0.168201	-0.212127	-1.26758	1	0.278857	0.395613	0.0151168	0.788783	0
Nuak1	ENSMUSG00000020032	310755	TGCAGCCCCGTGGAACGGTGATGCC	chr10:84375195-84375219_-	chr10:84373773-84375445_-	-	87372_m6a_chr10:84373773-84375445_-	1.22992	1.11165	1.11877	1.73492	0.894676	0.936641	0.732676	0.667533	-0.755588	0.357837	0.393998	0.00259887	0.0681227	0.345999	0
Nuak1	ENSMUSG00000020032	537624	TCAGCCTGCAGCCCCGTGGAACGGT	chr10:84375189-84375213_-	chr10:84373773-84375445_-	-	87371_m6a_chr10:84373773-84375445_-	0.500917	-0.139718	0.802051	0.862531	0.544398	0.275455	0.754313	-0.00848643	-0.352965	1	1	0.758067	0.428461	0.356703	0
Nuak1	ENSMUSG00000020032	386904	TCAGCCTCAGCCTGCAGCCCCGTGG	chr10:84375183-84375207_-	chr10:84373773-84375445_-	-	87370_m6a_chr10:84373773-84375445_-	0.475348	0.651202	0.280616	0.920287	0.515309	0.174787	0.525735	0.142249	0.114919	1	1	0.858121	0.482473	0.0901392	0
Nuak1	ENSMUSG00000020032	563060	TTGGCTTCAGCCTCAGCCTGCAGCC	chr10:84375177-84375201_-	chr10:84373773-84375445_-	-	87369_m6a_chr10:84373773-84375445_-	0.507991	0.0761016	-0.168342	0.538726	0.211845	0.644906	-0.0522697	-1.03606	-1.24567	1	1	0.933345	0.656993	0.914391	0
Nuak1	ENSMUSG00000020032	543956	TTCATCTTGGCTTCAGCCTCAGCCT	chr10:84375171-84375195_-	chr10:84373773-84375445_-	-	87368_m6a_chr10:84373773-84375445_-	0.432981	0.69249	0.970302	-0.424718	0.00796044	0.683456	0.179473	0.229365	-0.0765781	0.819749	1	0.339836	0.846032	0.169266	0
Nuak1	ENSMUSG00000020032	624437	AGACCCTTCATCTTGGCTTCAGCCT	chr10:84375165-84375189_-	chr10:84373773-84375445_-	-	87367_m6a_chr10:84373773-84375445_-	0.41029	1.08456	0.930004	0.432636	0.136244	0.806893	-0.00331057	0.574476	-0.204868	0.472431	1	0.231198	0.619457	0.317428	0
Nuak1	ENSMUSG00000020032	363652	TTGGCCAGACCCTTCATCTTGGCTT	chr10:84375159-84375183_-	chr10:84373773-84375445_-	-	87366_m6a_chr10:84373773-84375445_-	1.12535	1.19961	1.05233	1.34464	0.93279	0.764276	0.096582	0.463502	-0.0854534	0.113555	0.331282	0.00355766	0.0527419	0.206356	0
Nuak1	ENSMUSG00000020032	896114	CCGGGTTTGGCCAGACCCTTCATCT	chr10:84375153-84375177_-	chr10:84373773-84375445_-	-	87365_m6a_chr10:84373773-84375445_-	-0.219648	0.75313	1.00069	0.278148	0.555407	0.700854	-0.539771	0.358084	0.31003	1	1	0.604893	0.541591	0.439544	0
Nuak1	ENSMUSG00000020032	924974	GAGGCCCCGGGTTTGGCCAGACCCT	chr10:84375147-84375171_-	chr10:84373773-84375445_-	-	87364_m6a_chr10:84373773-84375445_-	0.052062	-0.0702291	0.066244	0.873818	0.0571134	0.88555	0.110423	-0.273207	0.0181442	1	0.085781	0.997484	0.399721	0.620958	0
Nuak1	ENSMUSG00000020032	315645	ACCTCAGAGGCCCCGGGTTTGGCCA	chr10:84375141-84375165_-	chr10:84373773-84375445_-	-	87363_m6a_chr10:84373773-84375445_-	0.537867	0.335135	0.384194	0.712016	0.535675	0.696371	0.148871	-0.445035	0.15757	0.479625	0.0464316	0.960895	0.0814881	0.568051	0
Nuak1	ENSMUSG00000020032	813743	AACACAACCTCAGAGGCCCCGGGTT	chr10:84375135-84375159_-	chr10:84373773-84375445_-	-	87362_m6a_chr10:84373773-84375445_-	-0.683013	-0.326194	-0.559356	-0.446869	-0.919316	-0.0632256	-0.824636	0.060303	-0.505805	1	1	0.995894	0.972043	0.875389	0
Nuak1	ENSMUSG00000020032	86042	CGCTCCAACACAACCTCAGAGGCCC	chr10:84375129-84375153_-	chr10:84373773-84375445_-	-	87361_m6a_chr10:84373773-84375445_-	1.11895	-0.234455	0.722908	0.226313	0.709454	0.998941	-0.0735639	-0.368905	0.420705	0.248627	0.109877	0.577042	0.325366	0.499699	0
Nuak1	ENSMUSG00000020032	881338	CGCTGCCGCTCCAACACAACCTCAG	chr10:84375123-84375147_-	chr10:84373773-84375445_-	-	87360_m6a_chr10:84373773-84375445_-	-1.29381	0.67488	0.657045	0.0014036	-0.957646	-0.888025	-1.02853	0.207753	0.0988614	1	1	0.77603	0.966971	0.692529	0
Nuak1	ENSMUSG00000020032	121720	AGTGACCGCTGCCGCTCCAACACAA	chr10:84375117-84375141_-	chr10:84373773-84375445_-	-	87359_m6a_chr10:84373773-84375445_-	0.0128269	-0.247137	-0.00905398	-0.236096	0.202941	-0.139227	-0.215017	-0.489044	0.0594547	1	1	0.993181	0.975834	0.839776	0
Nuak1	ENSMUSG00000020032	61900	TTCTTCAGTGACCGCTGCCGCTCCA	chr10:84375111-84375135_-	chr10:84373773-84375445_-	-	87358_m6a_chr10:84373773-84375445_-	0.094268	0.0417609	-0.0685143	0.407047	0.308436	0.138704	-0.181832	-0.20741	0.228157	1	1	0.996854	0.954394	0.612868	0
Nuak1	ENSMUSG00000020032	942955	TTGGACTTCTTCAGTGACCGCTGCC	chr10:84375105-84375129_-	chr10:84373773-84375445_-	-	87357_m6a_chr10:84373773-84375445_-	-0.578835	-0.611863	0.155898	-0.425409	-0.954179	0.0590138	-0.913381	-0.572056	-0.21074	1	1	0.969598	0.959635	0.94466	0
Nuak1	ENSMUSG00000020032	824918	TCTTTCTTGGACTTCTTCAGTGACC	chr10:84375099-84375123_-	chr10:84373773-84375445_-	-	87356_m6a_chr10:84373773-84375445_-	-0.786194	0.947173	-0.504588	0.750604	-0.56495	1.34691	-0.693512	-0.0861252	0.500419	1	1	0.84867	0.509545	0.586503	0
Nuak1	ENSMUSG00000020032	773165	TCGTTCTCTTTCTTGGACTTCTTCA	chr10:84375093-84375117_-	chr10:84373773-84375445_-	-	87355_m6a_chr10:84373773-84375445_-	-0.0378789	0.93007	-0.141973	-0.684312	-0.652212	0.637748	-0.535012	0.938682	-0.567035	1	1	0.806404	0.888286	0.533386	0
Nuak1	ENSMUSG00000020032	699308	GGAAAGTCGTTCTCTTTCTTGGACT	chr10:84375087-84375111_-	chr10:84373773-84375445_-	-	87354_m6a_chr10:84373773-84375445_-	2.14362	1.1209	1.36448	0.957687	1.45036	1.6519	0.589636	0.0923605	0.631052	0.465333	0.913369	0.0483335	0.0284412	0.0618675	1
Nuak1	ENSMUSG00000020032	105558	GACTGGGGAAAGTCGTTCTCTTTCT	chr10:84375081-84375105_-	chr10:84373773-84375445_-	-	87353_m6a_chr10:84373773-84375445_-	0.773562	0.209375	0.95753	0.523078	1.00361	0.130824	0.245568	-2.85342	-0.044282	1	1	0.464867	0.463119	0.765677	0
Nuak1	ENSMUSG00000020032	853866	TGGCCAGACTGGGGAAAGTCGTTCT	chr10:84375075-84375099_-	chr10:84373773-84375445_-	-	87352_m6a_chr10:84373773-84375445_-	0.682548	2.25201	1.12677	1.31978	1.40715	0.701125	-0.0693471	-0.143154	-0.478799	0.319588	0.719489	0.129389	0.0545254	0.890604	0
Nuak1	ENSMUSG00000020032	935864	GAGTCCTGGCCAGACTGGGGAAAGT	chr10:84375069-84375093_-	chr10:84373773-84375445_-	-	87351_m6a_chr10:84373773-84375445_-	0.145962	-0.182374		-0.199364	0.00381022	-0.945756	-1.03101	-3.20103	0.76248	1	1	0.920384	0.955902	0.789209	0
Nuak1	ENSMUSG00000020032	936269	GGTACGGAGTCCTGGCCAGACTGGG	chr10:84375063-84375087_-	chr10:84373773-84375445_-	-	87350_m6a_chr10:84373773-84375445_-	-0.118117	0.562127	1.90494	0.361659	-0.351696	0.233867	-0.987138	-0.362409	-0.498763	1	1	0.407302	0.909966	0.957548	0
Nuak1	ENSMUSG00000020032	104634	CTTTCAGGTACGGAGTCCTGGCCAG	chr10:84375057-84375081_-	chr10:84373773-84375445_-	-	87349_m6a_chr10:84373773-84375445_-	0.899897	1.04529	1.86251	1.45761	0.819672	0.818796	0.481474	0.291676	0.619289	1	1	0.0821302	0.0702753	0.0191211	0
Nuak1	ENSMUSG00000020032	865426	GATGGGCTTTCAGGTACGGAGTCCT	chr10:84375051-84375075_-	chr10:84373773-84375445_-	-	87348_m6a_chr10:84373773-84375445_-	0.321676	1.11165	0.682204	0.18449	-0.460903	0.760525	-1.10876	-0.123537	-0.00692314	1	1	0.378666	0.795084	0.817208	0
Nuak1	ENSMUSG00000020032	415384	AGCTTGGATGGGCTTTCAGGTACGG	chr10:84375045-84375069_-	chr10:84373773-84375445_-	-	87347_m6a_chr10:84373773-84375445_-	1.4372	1.02827	0.899924	1.59885	1.49839	1.32786	0.52929	0.332955	0.434202	1	0.936399	0.0458565	0.00343803	0.00811226	0
Nuak1	ENSMUSG00000020032	409401	GAACTCAGCTTGGATGGGCTTTCAG	chr10:84375039-84375063_-	chr10:84373773-84375445_-	-	87346_m6a_chr10:84373773-84375445_-	0.901907	0.174631	1.7805	0.426965	1.28639	0.951527	0.0260695	-0.401369	-0.222152	0.529152	0.769708	0.276577	0.142278	0.869025	0
Nuak1	ENSMUSG00000020032	326661	CTCTTGGAACTCAGCTTGGATGGGC	chr10:84375033-84375057_-	chr10:84373773-84375445_-	-	87345_m6a_chr10:84373773-84375445_-	1.63104	1.57275	1.71756	1.82542	1.76481	1.22104	0.589543	0.647078	0.414227	0.0998543	0.185611	0.000854842	0.0151772	0.00770033	0
Nuak1	ENSMUSG00000020032	421450	TTGGGCCTCTTGGAACTCAGCTTGG	chr10:84375027-84375051_-	chr10:84373773-84375445_-	-	87344_m6a_chr10:84373773-84375445_-	1.35399	0.997244	1.2471	0.480495	1.00045	1.59655	0.343919	0.173607	-0.176899	0.0753755	0.328997	0.016084	0.13065	0.256355	0
Nuak1	ENSMUSG00000020032	151743	ATGCCCTTGGGCCTCTTGGAACTCA	chr10:84375021-84375045_-	chr10:84373773-84375445_-	-	87343_m6a_chr10:84373773-84375445_-	0.993245	0.290575	0.957863	0.0956059	0.802309	1.09788	0.00388648	-0.56108	-0.123509	0.713466	1	0.322389	0.342908	0.835909	0
Nuak1	ENSMUSG00000020032	553805	TTCAGGATGCCCTTGGGCCTCTTGG	chr10:84375015-84375039_-	chr10:84373773-84375445_-	-	87342_m6a_chr10:84373773-84375445_-	1.42467	0.631963	1.28043	1.34084	1.30818	1.36384	0.668051	0.626714	-0.531527	0.0698755	0.0108324	0.0916409	0.00019787	0.286957	0
Nuak1	ENSMUSG00000020032	385360	CGTTTCTTCAGGATGCCCTTGGGCC	chr10:84375009-84375033_-	chr10:84373773-84375445_-	-	87341_m6a_chr10:84373773-84375445_-	1.80861	1.589	2.16073	2.66258	1.45702	1.41884	0.747144	0.409029	0.410708	9.36094e-06	2.84975e-05	0.00894223	0.0419211	0.0211046	0
Nuak1	ENSMUSG00000020032	257083	TTGCTCCGTTTCTTCAGGATGCCCT	chr10:84375003-84375027_-	chr10:84373773-84375445_-	-	87340_m6a_chr10:84373773-84375445_-	1.20152	0.98223	0.688918	1.81771	0.872761	1.26459	-0.131022	0.122313	0.117339	0.0153678	4.01007e-05	0.077016	0.0508793	0.326839	0
Nuak1	ENSMUSG00000020032	390759	TCGCTGTTGCTCCGTTTCTTCAGGA	chr10:84374997-84375021_-	chr10:84373773-84375445_-	-	87339_m6a_chr10:84373773-84375445_-	1.63107	1.55772	1.11626	2.23631	1.58126	1.44313	0.447864	-0.0865386	0.0458781	0.00216595	6.67027e-05	0.0185806	0.018752	0.233443	1
Nuak1	ENSMUSG00000020032	893012	CGGTGTTCGCTGTTGCTCCGTTTCT	chr10:84374991-84375015_-	chr10:84373773-84375445_-	-	87338_m6a_chr10:84373773-84375445_-	1.06669	0.901511	1.28855	0.982143	0.421709	0.915461	0.212422	0.239105	0.39327	0.298828	1	0.0271697	0.14856	0.0179924	0
Nuak1	ENSMUSG00000020032	301360	TGGGAGCGGTGTTCGCTGTTGCTCC	chr10:84374985-84375009_-	chr10:84373773-84375445_-	-	87337_m6a_chr10:84373773-84375445_-	1.21383	1.0613	1.11626	1.07344	0.791803	1.24033	0.188563	0.738658	0.160121	0.381354	0.722726	0.00383879	0.0300957	0.0942058	1
Nuak1	ENSMUSG00000020032	468863	GTGCTGTGGGAGCGGTGTTCGCTGT	chr10:84374979-84375003_-	chr10:84373773-84375445_-	-	87336_m6a_chr10:84373773-84375445_-	1.94841	2.46573	1.78446	2.54703	1.80331	1.46821	0.713282	0.283015	-0.414359	2.08987e-08	8.55258e-07	0.00983899	0.0236457	0.301126	2	**
Nuak1	ENSMUSG00000020032	920283	AAGCCAGTGCTGTGGGAGCGGTGTT	chr10:84374973-84374997_-	chr10:84373773-84375445_-	-	87335_m6a_chr10:84373773-84375445_-	-0.113118	1.67791	1.08691	-0.115431	-0.386985	0.032088	-1.33913	-0.0886579	-0.0237241	0.135566	1	0.335558	0.984592	0.809209	1
Nuak1	ENSMUSG00000020032	288194	TCGATAAAGCCAGTGCTGTGGGAGC	chr10:84374967-84374991_-	chr10:84373773-84375445_-	-	87334_m6a_chr10:84373773-84375445_-	1.1205	0.260002	1.18546	0.950745	0.384683	0.420702	0.748546		-1.37874	0.280531	1	0.25989	0.388368	0.589621	0
Nuak1	ENSMUSG00000020032	716886	ATGCCTTCGATAAAGCCAGTGCTGT	chr10:84374961-84374985_-	chr10:84373773-84375445_-	-	87333_m6a_chr10:84373773-84375445_-	-0.754851	0.532564	0.51172	0.501818	0.414235	-1.9675	0.314549		0.269083	1	1	0.829655	0.804117	0.0241335	0
Nuak1	ENSMUSG00000020032	194981	CTCACAATGCCTTCGATAAAGCCAG	chr10:84374955-84374979_-	chr10:84373773-84375445_-	-	87332_m6a_chr10:84373773-84375445_-	0.219397	-0.280394	-0.936497	-1.61601	0.392668		-0.439925	0.495331		1	1	0.948169	0.769803	0.476116	0
Nuak1	ENSMUSG00000020032	409048	GCAGGGCTCACAATGCCTTCGATAA	chr10:84374949-84374973_-	chr10:84373773-84375445_-	-	87331_m6a_chr10:84373773-84375445_-	0.747724	0.905933	0.814026	0.543169	0.697138	0.850875	0.56209	-0.771675	-0.299082	0.580712	0.978741	0.0248136	0.0970823	0.640848	0
Nuak1	ENSMUSG00000020032	300449	GGTAAGGCAGGGCTCACAATGCCTT	chr10:84374943-84374967_-	chr10:84373773-84375445_-	-	87330_m6a_chr10:84373773-84375445_-	1.43545	-0.9443	1.43892	1.48297	0.433023	1.09736	0.32881	0.081954	-1.84658	1	0.454851	0.491558	0.129562	0.717994	0
Nuak1	ENSMUSG00000020032	325377	GGGGATGGTAAGGCAGGGCTCACAA	chr10:84374937-84374961_-	chr10:84373773-84375445_-	-	87329_m6a_chr10:84373773-84375445_-	1.4507	0.6309	1.01478	0.576412	0.707568	1.23898	0.466194	0.0754727	0.284843	1	1	0.113632	0.130156	0.0645324	0
Nuak1	ENSMUSG00000020032	731469	TTGAAAGGGGATGGTAAGGCAGGGC	chr10:84374931-84374955_-	chr10:84373773-84375445_-	-	87328_m6a_chr10:84373773-84375445_-	0.693963	0.0745258	0.437184	0.658814	1.20683	0.627509	0.23254	1.19984	-0.391977	1	1	0.829388	0.12322	0.262099	0
Nuak1	ENSMUSG00000020032	900050	TCCATTTTGAAAGGGGATGGTAAGG	chr10:84374925-84374949_-	chr10:84373773-84375445_-	-	87327_m6a_chr10:84373773-84375445_-	0.932453	1.49552	0.155573		-0.186873	-0.705547	-1.48667	0.0611174	-0.69653	1	1	0.30209	0.917032	0.871117	0
Nuak1	ENSMUSG00000020032	269374	TCTTGCTCCATTTTGAAAGGGGATG	chr10:84374919-84374943_-	chr10:84373773-84375445_-	-	87326_m6a_chr10:84373773-84375445_-	0.34442	-0.545475		0.527219	-0.681835		-0.277004	0.416422	1.4062	1	1	0.824773	0.749707	0.198293	0
Nuak1	ENSMUSG00000020032	312176	CACAAATCTTGCTCCATTTTGAAAG	chr10:84374913-84374937_-	chr10:84373773-84375445_-	-	87325_m6a_chr10:84373773-84375445_-	1.95641		-1.21341	-1.66197	-0.705513	0.950344	0.6072	1.84624		1	1	0.550368	0.839573	0.148085	0
Nuak1	ENSMUSG00000020032	684396	GTCCGGCACAAATCTTGCTCCATTT	chr10:84374907-84374931_-	chr10:84373773-84375445_-	-	87324_m6a_chr10:84373773-84375445_-	0.349436	1.07129	1.01569	-0.136355	0.259075	0.100529	-0.12475	-0.816905	-0.238214	1	1	0.251604	0.970484	0.893188	0
Nuak1	ENSMUSG00000020032	402486	ATGGCAGTCCGGCACAAATCTTGCT	chr10:84374901-84374925_-	chr10:84373773-84375445_-	-	87323_m6a_chr10:84373773-84375445_-	1.32182	1.15462	0.721283	0.446037	0.795354	0.957497	0.129027	0.011201	0.601957	1	1	0.0662073	0.152004	0.146752	0
Nuak1	ENSMUSG00000020032	788193	AGGGGGATGGCAGTCCGGCACAAAT	chr10:84374895-84374919_-	chr10:84373773-84375445_-	-	87322_m6a_chr10:84373773-84375445_-	0.416271	0.702188	1.15461	0.631113	0.615764	0.32552	0.269016	0.513519	0.993518	1	1	0.299209	0.507019	0.0531466	0
Nuak1	ENSMUSG00000020032	333695	CTGGGGAGGGGGATGGCAGTCCGGC	chr10:84374889-84374913_-	chr10:84373773-84375445_-	-	87321_m6a_chr10:84373773-84375445_-	0.903861	1.07302	1.03793	1.41954	0.470722	0.663433	0.822238	0.760293	-0.0192864	1	1	0.00892798	0.18909	0.095103	0
Nuak1	ENSMUSG00000020032	542835	GGGGAGCTGGGGAGGGGGATGGCAG	chr10:84374883-84374907_-	chr10:84373773-84375445_-	-	87320_m6a_chr10:84373773-84375445_-	-0.259114	0.696568	0.738382	0.518854	-0.501064	-0.412682	0.0206722	1.3352	1.54336	1	1	0.725243	0.909335	0.088885	0
Nuak1	ENSMUSG00000020032	383528	GCCTCGGGGGAGCTGGGGAGGGGGA	chr10:84374877-84374901_-	chr10:84373773-84375445_-	-	87319_m6a_chr10:84373773-84375445_-	-0.192885	0.796217	0.628655	0.701525	-0.214175	-0.211021	0.237999	1.04295	1.13358	1	1	0.721637	0.854807	0.0519899	0
Nuak1	ENSMUSG00000020032	25457	ATATCTGCCTCGGGGGAGCTGGGGA	chr10:84374871-84374895_-	chr10:84373773-84375445_-	-	87318_m6a_chr10:84373773-84375445_-	0.0985129	0.693363	0.501343	0.46097	-0.0103811	-0.148319	-0.0366463	1.20824	0.759906	1	1	0.807499	0.926228	0.107745	0
Nuak1	ENSMUSG00000020032	148928	CCTGACATATCTGCCTCGGGGGAGC	chr10:84374865-84374889_-	chr10:84373773-84375445_-	-	87317_m6a_chr10:84373773-84375445_-	0.972975	1.42151	0.765099	1.25903	0.501023	0.733193	0.110418	-0.0665225	0.167598	1	1	0.078636	0.153404	0.19196	0
Nuak1	ENSMUSG00000020032	392420	AGCTTCCCTGACATATCTGCCTCGG	chr10:84374859-84374883_-	chr10:84373773-84375445_-	-	87316_m6a_chr10:84373773-84375445_-	1.24335	1.28924	1.87714	1.50946	0.843224	0.45511	0.608619	-0.243858	-0.421282	1	1	0.0268001	0.157301	0.512663	0
Nuak1	ENSMUSG00000020032	456398	AGGCTGAGCTTCCCTGACATATCTG	chr10:84374853-84374877_-	chr10:84373773-84375445_-	-	87315_m6a_chr10:84373773-84375445_-	1.181	1.22587	1.15851	1.82275	0.994225	0.929173	0.553089	0.199728	-0.0109873	1	1	0.000615016	0.0642908	0.130864	0
Nuak1	ENSMUSG00000020032	483501	TGTTTGAGGCTGAGCTTCCCTGACA	chr10:84374847-84374871_-	chr10:84373773-84375445_-	-	87314_m6a_chr10:84373773-84375445_-	0.910586	0.278497	0.691093	0.488951	0.679995	0.890966	0.479431	-0.679854	-0.503394	1	1	0.495565	0.150451	0.70343	0
Nuak1	ENSMUSG00000020032	781438	GCAGACTGTTTGAGGCTGAGCTTCC	chr10:84374841-84374865_-	chr10:84373773-84375445_-	-	87313_m6a_chr10:84373773-84375445_-	0.0125817	1.14507	-0.676398	0.321301	0.00506468	1.23345	-0.189241	-3.39327	-2.73486	1	1	0.76282	0.505919	0.917606	0
Nuak1	ENSMUSG00000020032	658061	ATCGTGGCAGACTGTTTGAGGCTGA	chr10:84374835-84374859_-	chr10:84373773-84375445_-	-	87312_m6a_chr10:84373773-84375445_-	1.18784	0.900686	0.749083	0.174833	0.760824	0.999904	-0.438805	0.914467	-2.10681	1	1	0.0648626	0.337543	0.699057	0
Nuak1	ENSMUSG00000020032	820759	TTGGGCATCGTGGCAGACTGTTTGA	chr10:84374829-84374853_-	chr10:84373773-84375445_-	-	87311_m6a_chr10:84373773-84375445_-	-0.812462	0.654868	1.36448	-1.53095	0.112866	2.2569	-0.856294		-0.397682	1	1	0.618987	0.578487	0.887162	0
Nuak1	ENSMUSG00000020032	52860	CCTTTCTTGGGCATCGTGGCAGACT	chr10:84374823-84374847_-	chr10:84373773-84375445_-	-	87310_m6a_chr10:84373773-84375445_-	0.702937	-0.110909	0.787588	0.146367	0.641351	0.735534	-0.108757	-0.159281	0.604246	1	1	0.688154	0.535426	0.337851	0
Nuak1	ENSMUSG00000020032	422469	AAGATGCCTTTCTTGGGCATCGTGG	chr10:84374817-84374841_-	chr10:84373773-84375445_-	-	87309_m6a_chr10:84373773-84375445_-	0.295018	-0.338573		1.16407	0.796661	-0.160058	0.195678	1.5058		1	1	0.854906	0.434179	0.207526	0
Nuak1	ENSMUSG00000020032	117247	TTTTTCAAGATGCCTTTCTTGGGCA	chr10:84374811-84374835_-	chr10:84373773-84375445_-	-	87308_m6a_chr10:84373773-84375445_-	-1.10252	1.48566	1.20649	0.644927	0.0581471	1.08148	0.6072			1	1	0.540612	0.419097	1	0
Nuak1	ENSMUSG00000020032	563793	TGGGTCTTTTTCAAGATGCCTTTCT	chr10:84374805-84374829_-	chr10:84373773-84375445_-	-	87307_m6a_chr10:84373773-84375445_-	0.261512	1.26534	-0.405189	-1.18729	0.421349	1.34691	-0.0623467	-1.70118	0.515176	1	1	0.671379	0.651313	0.699571	0
Nuak1	ENSMUSG00000020032	240959	CTCTGCTGGGTCTTTTTCAAGATGC	chr10:84374799-84374823_-	chr10:84373773-84375445_-	-	87306_m6a_chr10:84373773-84375445_-	0.917916	0.600589	0.0472574	1.11778	0.602572	1.15938	-0.118988	0.392849		1	0.813577	0.636975	0.0681945	0.336498	0
Nuak1	ENSMUSG00000020032	545371	GATTCTCTCTGCTGGGTCTTTTTCA	chr10:84374793-84374817_-	chr10:84373773-84375445_-	-	87305_m6a_chr10:84373773-84375445_-	0.775681	0.793901	1.27273	0.213898	0.368943	1.37012	0.183126	0.0461138	0.335469	0.859338	1	0.0927741	0.381612	0.0720001	0
Nuak1	ENSMUSG00000020032	592705	TAGCCAGATTCTCTCTGCTGGGTCT	chr10:84374787-84374811_-	chr10:84373773-84375445_-	-	87304_m6a_chr10:84373773-84375445_-	1.41411	1.88159	1.48203	0.853522	1.36541	1.18811	0.500799	0.25717	0.00577069	0.0248459	0.533437	0.010972	0.0278033	0.104083	1
Nuak1	ENSMUSG00000020032	759926	GAATAGTAGCCAGATTCTCTCTGCT	chr10:84374781-84374805_-	chr10:84373773-84375445_-	-	87303_m6a_chr10:84373773-84375445_-	0.399891	1.06413	0.889465	0.72965	0.37265	0.278124	0.0640823	0.0146212	-0.153725	0.271996	1	0.252586	0.660635	0.59253	0
Nuak1	ENSMUSG00000020032	829347	GGGGATGAATAGTAGCCAGATTCTC	chr10:84374775-84374799_-	chr10:84373773-84375445_-	-	87302_m6a_chr10:84373773-84375445_-	0.261512	0.431927	1.94917	-0.235116	-0.214966	0.00998799	-0.138894	0.342693	-1.37874	0.0995106	1	0.339863	0.993319	0.734085	0
Nuak1	ENSMUSG00000020032	356031	CGCTCTGGGGATGAATAGTAGCCAG	chr10:84374769-84374793_-	chr10:84373773-84375445_-	-	87301_m6a_chr10:84373773-84375445_-	1.17966	0.835197	0.901024	0.901272	1.19768	1.37499	0.254213	0.080881	-0.222579	0.183847	0.0752028	0.0405952	0.022323	0.388786	1
Nuak1	ENSMUSG00000020032	618435	TCGCTGCGCTCTGGGGATGAATAGT	chr10:84374763-84374787_-	chr10:84373773-84375445_-	-	87300_m6a_chr10:84373773-84375445_-	1.02339	2.18662	1.20139	0.907239	0.878653	1.69111	0.532576	0.0392635	-2.38391	0.00113109	0.0470252	0.0721364	0.0702685	0.711959	0
Nuak1	ENSMUSG00000020032	806275	GAGGACTCGCTGCGCTCTGGGGATG	chr10:84374757-84374781_-	chr10:84373773-84375445_-	-	87299_m6a_chr10:84373773-84375445_-	0.297509	0.718054	0.689104	0.26675	0.244342	0.741753	-0.3195	-0.331964	-0.234529	1	1	0.640554	0.713779	0.99444	0
Nuak1	ENSMUSG00000020032	273157	AGTTCCGAGGACTCGCTGCGCTCTG	chr10:84374751-84374775_-	chr10:84373773-84375445_-	-	87298_m6a_chr10:84373773-84375445_-	1.90419	1.91863	1.54095	1.83894	1.26237	1.46776	0.274582	-0.150623	-0.948144	0.00636752	0.0646433	0.00554471	0.0137342	0.733232	1
Nuak1	ENSMUSG00000020032	236080	TCCAGCAGTTCCGAGGACTCGCTGC	chr10:84374745-84374769_-	chr10:84373773-84375445_-	-	87297_m6a_chr10:84373773-84375445_-	1.26902	1.20575	0.743838	1.75423	1.16831	0.952545	0.258224	0.167872	0.929821	1	0.949835	0.0567506	0.0427526	0.0980474	0
Nuak1	ENSMUSG00000020032	652685	TTGCTGTCCAGCAGTTCCGAGGACT	chr10:84374739-84374763_-	chr10:84373773-84375445_-	-	87296_m6a_chr10:84373773-84375445_-	0.731296	1.36801	0.804037	0.267714	0.654537	1.08687	-0.713902	-0.350441	0.104047	0.567151	1	0.115014	0.302802	0.841358	0
Nuak1	ENSMUSG00000020032	642939	ACATCGTTGCTGTCCAGCAGTTCCG	chr10:84374733-84374757_-	chr10:84373773-84375445_-	-	87295_m6a_chr10:84373773-84375445_-	0.658858	0.337046	-0.585943	-0.0373907	-0.136751	0.955267	-0.139115	-0.768026	-2.72542	1	1	0.839424	0.737223	0.868854	0
Nuak1	ENSMUSG00000020032	792774	ATGACCACATCGTTGCTGTCCAGCA	chr10:84374727-84374751_-	chr10:84373773-84375445_-	-	87294_m6a_chr10:84373773-84375445_-	-0.530842	1.0734	0.546239	0.24522	-0.234193	-0.102058	-0.810352	0.627315	0.0420577	1	1	0.682334	0.969941	0.533419	0
Nuak1	ENSMUSG00000020032	867311	CCACTGATGACCACATCGTTGCTGT	chr10:84374721-84374745_-	chr10:84373773-84375445_-	-	87293_m6a_chr10:84373773-84375445_-	-0.491563	0.309383	-0.0965856	-0.279611	-0.224702	-0.598121	-0.835138	-0.377282	-0.213051	1	1	0.954959	0.991725	0.935731	0
Nuak1	ENSMUSG00000020032	712261	AGGCCACCACTGATGACCACATCGT	chr10:84374715-84374739_-	chr10:84373773-84375445_-	-	87292_m6a_chr10:84373773-84375445_-	0.289071	-0.1927	-0.178274	-0.607763	0.241926	0.0111907	-0.494099	-0.918864	-0.557395	1	1	0.972896	0.93685	0.980451	0
Nuak1	ENSMUSG00000020032	743161	GACGAGAGGCCACCACTGATGACCA	chr10:84374709-84374733_-	chr10:84373773-84375445_-	-	87291_m6a_chr10:84373773-84375445_-	-0.12401	0.409444	0.330786	-0.11775	-0.0938702	0.0221083	-0.933206	0.53677	0.624106	1	1	0.936031	0.997335	0.442066	0
Nuak1	ENSMUSG00000020032	845280	GGAGGGGACGAGAGGCCACCACTGA	chr10:84374703-84374727_-	chr10:84373773-84375445_-	-	87290_m6a_chr10:84373773-84375445_-	-0.354922	-0.776968	0.387867	0.0981427	-0.337735	0.0133005	-0.481556	0.199728	-2.07869	1	1	0.93775	0.977081	0.816162	0
Nuak1	ENSMUSG00000020032	528825	TCTGGGGGAGGGGACGAGAGGCCAC	chr10:84374697-84374721_-	chr10:84373773-84375445_-	-	87289_m6a_chr10:84373773-84375445_-	0.707297	1.67021	1.27569	0.808909	0.303369	0.46051	0.277119	1.30902	0.363012	1	1	0.0838723	0.504362	0.0925797	0
Nuak1	ENSMUSG00000020032	602577	GCTGGGTCTGGGGGAGGGGACGAGA	chr10:84374691-84374715_-	chr10:84373773-84375445_-	-	87288_m6a_chr10:84373773-84375445_-	0.0418896	1.02977	1.07954	0.386244	-0.379985	-0.290175	0.366097	0.908079	1.18006	1	1	0.404815	0.93793	0.0373488	0
Nuak1	ENSMUSG00000020032	163616	CCCCTGGCTGGGTCTGGGGGAGGGG	chr10:84374685-84374709_-	chr10:84373773-84375445_-	-	87287_m6a_chr10:84373773-84375445_-	0.307924	0.311952	0.729366	0.268489	0.298473	0.416579	0.244206	0.685824	0.781706	1	1	0.831011	0.975874	0.0365579	0
Nuak1	ENSMUSG00000020032	82570	GAAGTTCCCCTGGCTGGGTCTGGGG	chr10:84374679-84374703_-	chr10:84373773-84375445_-	-	87286_m6a_chr10:84373773-84375445_-	0.428306	-0.213292	-0.22948	0.0348142	0.402803	0.353757	0.0985639	-0.644948	0.408368	1	1	0.949553	0.924581	0.543449	0
Nuak1	ENSMUSG00000020032	92829	CTGTGGGAAGTTCCCCTGGCTGGGT	chr10:84374673-84374697_-	chr10:84373773-84375445_-	-	87285_m6a_chr10:84373773-84375445_-	0.927546	-0.217637	0.706475	-0.0720413	0.625118	0.596014	0.169944	-0.897375	-0.0170005	1	1	0.646737	0.703025	0.729697	0
Nuak1	ENSMUSG00000020032	129354	GACAGGCTGTGGGAAGTTCCCCTGG	chr10:84374667-84374691_-	chr10:84373773-84375445_-	-	87284_m6a_chr10:84373773-84375445_-	0.783275	0.78034	1.27569	0.519603	0.681416	0.55568	-0.0642629	-0.971873	0.386064	0.522019	1	0.0948049	0.174569	0.673709	0
Nuak1	ENSMUSG00000020032	288518	CGGCAGGACAGGCTGTGGGAAGTTC	chr10:84374661-84374685_-	chr10:84373773-84375445_-	-	87283_m6a_chr10:84373773-84375445_-	1.53446	0.431927	1.15378	1.27605	0.861326	0.952545	0.064975	0.45277	0.653614	0.543352	0.677764	0.16367	0.0285366	0.0739099	0
Nuak1	ENSMUSG00000020032	922973	TTCCTCCGGCAGGACAGGCTGTGGG	chr10:84374655-84374679_-	chr10:84373773-84375445_-	-	87282_m6a_chr10:84373773-84375445_-	0.544746	1.31569	1.77081	0.135716	0.227485	0.374264	-0.489107	0.348143	0.19386	0.000239977	1	0.121569	0.971852	0.465609	0
Nuak1	ENSMUSG00000020032	49665	ATGCCCTTCCTCCGGCAGGACAGGC	chr10:84374649-84374673_-	chr10:84373773-84375445_-	-	87281_m6a_chr10:84373773-84375445_-	0.771464	0.375135	0.00557023	0.700038	0.648408	0.571691	0.284367	-0.3458	0.148668	1	1	0.804677	0.0462364	0.433161	0
Nuak1	ENSMUSG00000020032	883942	TTTAAGATGCCCTTCCTCCGGCAGG	chr10:84374643-84374667_-	chr10:84373773-84375445_-	-	87280_m6a_chr10:84373773-84375445_-	-0.149509	0.445455	-0.181677	-0.0386615	-0.373094	-0.621656	-0.40657	0.402103	-0.313042	1	1	0.948675	0.982179	0.631408	0
Nuak1	ENSMUSG00000020032	761462	CTATGTTTTAAGATGCCCTTCCTCC	chr10:84374637-84374661_-	chr10:84373773-84375445_-	-	87279_m6a_chr10:84373773-84375445_-	-0.129755	0.303666	0.613215	0.331716	0.135274	-0.0684935	0.213954	0.676113	0.460643	1	1	0.882531	0.961734	0.037789	0
Nuak1	ENSMUSG00000020032	601974	CTGCTACTATGTTTTAAGATGCCCT	chr10:84374631-84374655_-	chr10:84373773-84375445_-	-	87278_m6a_chr10:84373773-84375445_-	0.332611	0.360517	0.226228	7.57358	0.139553	0.677834	0.143664			1	3.80846e-07	0.991921	0.221427	1	0
Nuak1	ENSMUSG00000020032	542888	GAGTACCTGCTACTATGTTTTAAGA	chr10:84374625-84374649_-	chr10:84373773-84375445_-	-	87277_m6a_chr10:84373773-84375445_-	0.261009	2.41776	-0.494542	-0.541451	-0.012892		-0.633458	-1.50739		1	1	0.458139	0.898826	0.875853	0
Nuak1	ENSMUSG00000020032	940587	CCATCTGAGTACCTGCTACTATGTT	chr10:84374619-84374643_-	chr10:84373773-84375445_-	-	87276_m6a_chr10:84373773-84375445_-	-0.129942	0.174631	0.696444	-0.47328	0.0473947	0.792361	-0.766323	0.92715	0.549773	1	1	0.870858	0.806958	0.340506	0
Nuak1	ENSMUSG00000020032	903293	GTGCCACCATCTGAGTACCTGCTAC	chr10:84374613-84374637_-	chr10:84373773-84375445_-	-	87275_m6a_chr10:84373773-84375445_-	0.24455	1.17412	1.11457	0.446784	-0.129869	0.0520421	-0.448026	0.227092	0.500034	1	1	0.270079	0.929295	0.377744	0
Nuak1	ENSMUSG00000020032	266818	GGGTCTGTGCCACCATCTGAGTACC	chr10:84374607-84374631_-	chr10:84373773-84375445_-	-	87274_m6a_chr10:84373773-84375445_-	0.992055	-0.130094	0.518718	0.0966666	0.492997	1.07264	0.134484	-0.58935	0.124999	1	1	0.668074	0.465157	0.644714	0
Nuak1	ENSMUSG00000020032	496917	AGGGCAGGGTCTGTGCCACCATCTG	chr10:84374601-84374625_-	chr10:84373773-84375445_-	-	87273_m6a_chr10:84373773-84375445_-	1.12886	1.65683	1.78258	1.29471	1.17622	0.942009	0.705671	0.507798	-0.354653	0.0955385	0.728409	0.0231371	0.0137667	0.231057	1
Nuak1	ENSMUSG00000020032	919043	CGGGTGAGGGCAGGGTCTGTGCCAC	chr10:84374595-84374619_-	chr10:84373773-84375445_-	-	87272_m6a_chr10:84373773-84375445_-	-0.607101	0.540258	0.47859	0.428949	-0.357545	-0.346185	-1.19422	0.654582	-0.13109	1	1	0.839422	0.929515	0.637166	0
Nuak1	ENSMUSG00000020032	528462	TCAGGGCGGGTGAGGGCAGGGTCTG	chr10:84374589-84374613_-	chr10:84373773-84375445_-	-	87271_m6a_chr10:84373773-84375445_-	0.41854	0.503513	0.227136	0.719577	0.380582	0.603811	-0.216797	0.223324	0.104308	1	0.323297	0.950948	0.357338	0.38385	0
Nuak1	ENSMUSG00000020032	496074	GGCATTTCAGGGCGGGTGAGGGCAG	chr10:84374583-84374607_-	chr10:84373773-84375445_-	-	87270_m6a_chr10:84373773-84375445_-	0.638508	0.375363	1.13498	0.247055	0.427544	0.713008	0.206358	0.907603	-1.1906	0.0660696	0.826109	0.359968	0.657285	0.510371	0
Nuak1	ENSMUSG00000020032	321689	AGTGTGGGCATTTCAGGGCGGGTGA	chr10:84374577-84374601_-	chr10:84373773-84375445_-	-	87269_m6a_chr10:84373773-84375445_-	0.985465	1.94301	0.369419	1.29102	0.285482	1.23414	0.495459	-0.143154	0.237773	0.0196061	0.169455	0.204274	0.167445	0.192925	0
Nuak1	ENSMUSG00000020032	675494	GATTCCAGTGTGGGCATTTCAGGGC	chr10:84374571-84374595_-	chr10:84373773-84375445_-	-	87268_m6a_chr10:84373773-84375445_-	0.492779	1.22086	1.24235	0.692184	0.265873	0.854212	-0.167082	0.236487	0.159345	0.030765	0.803913	0.140256	0.350089	0.284182	0
Nuak1	ENSMUSG00000020032	216606	GACAAGGATTCCAGTGTGGGCATTT	chr10:84374565-84374589_-	chr10:84373773-84375445_-	-	87267_m6a_chr10:84373773-84375445_-	0.88843	0.40038		1.3103	1.24294	-0.78833	0.891795	-0.523004	0.74673	1	1	0.473965	0.46813	0.243756	0
Nuak1	ENSMUSG00000020032	929750	GGAGGTGACAAGGATTCCAGTGTGG	chr10:84374559-84374583_-	chr10:84373773-84375445_-	-	87266_m6a_chr10:84373773-84375445_-	-0.747231	-0.0322373	0.428453	0.287331	-0.723274	1.05069	-0.955246	0.37725	-0.125877	1	1	0.91876	0.702162	0.691059	0
Nuak1	ENSMUSG00000020032	661485	ACACCGGGAGGTGACAAGGATTCCA	chr10:84374553-84374577_-	chr10:84373773-84375445_-	-	87265_m6a_chr10:84373773-84375445_-	1.44285	-0.683232	1.49796	0.957687	1.20812	-0.151507	-0.65864	0.288966	-0.76047	1	1	0.43741	0.380571	0.80787	0
Nuak1	ENSMUSG00000020032	498556	GAGGGGACACCGGGAGGTGACAAGG	chr10:84374547-84374571_-	chr10:84373773-84375445_-	-	87264_m6a_chr10:84373773-84375445_-	1.44564	1.6755	-0.487223	0.445563	0.956104	0.46051	-0.0985179	0.987979	0.227137	1	1	0.373529	0.314762	0.179778	0
Nuak1	ENSMUSG00000020032	674957	CCATCGGAGGGGACACCGGGAGGTG	chr10:84374541-84374565_-	chr10:84373773-84375445_-	-	87263_m6a_chr10:84373773-84375445_-	1.11752	0.719677	1.09431	1.16407	0.13724	0.575843	-0.0675931	-1.97607	-1.86593	0.970219	1	0.055816	0.384792	0.91439	0
Nuak1	ENSMUSG00000020032	195354	GAGATGCCATCGGAGGGGACACCGG	chr10:84374535-84374559_-	chr10:84373773-84375445_-	-	87262_m6a_chr10:84373773-84375445_-	0.982809	2.44459	1.04665	2.03861	0.961514	0.744182	0.487429	-0.594795	0.461435	0.366336	0.822237	0.10538	0.106494	0.379243	0
Nuak1	ENSMUSG00000020032	362034	CTCCGAGAGATGCCATCGGAGGGGA	chr10:84374529-84374553_-	chr10:84373773-84375445_-	-	87261_m6a_chr10:84373773-84375445_-	0.703001	1.29628	-0.956245	0.578963	1.09377	0.862957	0.610386	-0.650905	0.771512	1	1	0.639386	0.0826471	0.316369	0
Nuak1	ENSMUSG00000020032	43043	CTGTAGCTCCGAGAGATGCCATCGG	chr10:84374523-84374547_-	chr10:84373773-84375445_-	-	87260_m6a_chr10:84373773-84375445_-	0.0750521		-0.780709		0.610787	0.0494023	0.38629	-2.19022	0.269083	1	1	0.868632	0.69404	0.695341	0
Nuak1	ENSMUSG00000020032	502058	GGGCGACTGTAGCTCCGAGAGATGC	chr10:84374517-84374541_-	chr10:84373773-84375445_-	-	87259_m6a_chr10:84373773-84375445_-	0.802547	1.46093	0.969121	1.32236	1.09505	0.72748	0.425649	0.286547	0.402076	1	1	0.0744439	0.0473779	0.00631306	0
Nuak1	ENSMUSG00000020032	631979	CTGGACGGGCGACTGTAGCTCCGAG	chr10:84374511-84374535_-	chr10:84373773-84375445_-	-	87258_m6a_chr10:84373773-84375445_-	1.32752	1.94978	1.52392	1.67584	1.5002	0.989807	0.656377	0.702274	0.0421874	0.0296291	0.227452	0.0168163	0.0262332	0.0777846	1
Nuak1	ENSMUSG00000020032	167928	ATGATACTGGACGGGCGACTGTAGC	chr10:84374505-84374529_-	chr10:84373773-84375445_-	-	87257_m6a_chr10:84373773-84375445_-	1.76269	1.15941	1.93995	1.32778	1.15484	1.75551	0.161452	0.378476	0.29471	0.0082824	0.0813993	0.0259455	0.019117	0.0228049	0
Nuak1	ENSMUSG00000020032	223295	TCACTGATGATACTGGACGGGCGAC	chr10:84374499-84374523_-	chr10:84373773-84375445_-	-	87256_m6a_chr10:84373773-84375445_-	1.42996	0.538864	0.881805	1.32898	1.48381	1.63841	-0.248209	0.623296	0.460554	1	0.337232	0.168049	0.00429433	0.198495	0
Nuak1	ENSMUSG00000020032	97608	CTGTCATCACTGATGATACTGGACG	chr10:84374493-84374517_-	chr10:84373773-84375445_-	-	87255_m6a_chr10:84373773-84375445_-	0.21635		0.503138	1.19118	0.0717396	-0.299077	0.144251	2.39308	-0.76047	1	1	0.841948	0.653828	0.293929	0
Nuak1	ENSMUSG00000020032	519318	AGGACACTGTCATCACTGATGATAC	chr10:84374487-84374511_-	chr10:84373773-84375445_-	-	87254_m6a_chr10:84373773-84375445_-				1.12395	-0.482771		-0.103445			1	1	1	0.579721	1	0
Nuak1	ENSMUSG00000020032	640052	CTGGACAGGACACTGTCATCACTGA	chr10:84374481-84374505_-	chr10:84373773-84375445_-	-	87253_m6a_chr10:84373773-84375445_-	-0.0968472		-0.611074	-0.728936	0.504148	0.748466	-0.178666	-0.136768		1	1	0.918198	0.738825	0.955907	0
Nuak1	ENSMUSG00000020032	243941	GAGTCGCTGGACAGGACACTGTCAT	chr10:84374475-84374499_-	chr10:84373773-84375445_-	-	87252_m6a_chr10:84373773-84375445_-	1.41459	0.947173	1.85232	1.20555	0.889011	1.30311	0.530999	-3.00228	0.138188	0.853989	1	0.0481261	0.0199737	0.718969	1
Nuak1	ENSMUSG00000020032	146605	TCGAAAGAGTCGCTGGACAGGACAC	chr10:84374469-84374493_-	chr10:84373773-84375445_-	-	87251_m6a_chr10:84373773-84375445_-	0.491778	1.56883		0.852419	0.798719	0.759376	0.435522	-1.09057	1.38371	1	1	0.294409	0.00465886	0.380741	0
Nuak1	ENSMUSG00000020032	277941	AACAAGTCGAAAGAGTCGCTGGACA	chr10:84374463-84374487_-	chr10:84373773-84375445_-	-	87250_m6a_chr10:84373773-84375445_-	1.47658				0.0717396		-0.726657			1	1	1	1	1	0
Nuak1	ENSMUSG00000020032	229810	AGCTCTAACAAGTCGAAAGAGTCGC	chr10:84374457-84374481_-	chr10:84373773-84375445_-	-	87249_m6a_chr10:84373773-84375445_-	0.242442		-0.0499289	-0.953629	-0.195608	1.27422	0.967074	2.19677		1	1	0.914047	0.732001	0.117494	0
Nuak1	ENSMUSG00000020032	126477	TCTTGAAGCTCTAACAAGTCGAAAG	chr10:84374451-84374475_-	chr10:84373773-84375445_-	-	87248_m6a_chr10:84373773-84375445_-	-0.965081		-0.2166	1.58269	0.345107	-1.01063			-0.328453	1	1	0.904908	0.601862	1	0
Nuak1	ENSMUSG00000020032	43010	CGGTTCTCTTGAAGCTCTAACAAGT	chr10:84374445-84374469_-	chr10:84373773-84375445_-	-	87247_m6a_chr10:84373773-84375445_-	0.282524	1.69364	0.066417		1.77473	-0.0908731	1.15442	1.39822	1.29549	1	1	0.460997	0.396084	0.00149335	0
Nuak1	ENSMUSG00000020032	835662	GCTGGCCGGTTCTCTTGAAGCTCTA	chr10:84374439-84374463_-	chr10:84373773-84375445_-	-	87246_m6a_chr10:84373773-84375445_-	0.0409717	1.02643	1.34511	0.18725	0.197039	0.40185	-0.563121	0.117514	-0.0281581	1	1	0.345958	0.968214	0.728647	0
Nuak1	ENSMUSG00000020032	251876	TGGCGGGCTGGCCGGTTCTCTTGAA	chr10:84374433-84374457_-	chr10:84373773-84375445_-	-	87245_m6a_chr10:84373773-84375445_-	1.06382	0.702188	0.42744	0.998622	0.84232	0.827051	-0.0862032	0.481941	0.255572	1	1	0.310475	0.0110154	0.153444	0
Nuak1	ENSMUSG00000020032	450598	ATGCGCTGGCGGGCTGGCCGGTTCT	chr10:84374427-84374451_-	chr10:84373773-84375445_-	-	87244_m6a_chr10:84373773-84375445_-	0.712043	0.707833	0.598865	-0.113595	0.255361	0.0417467	0.168642	0.876908	0.236392	1	1	0.160278	0.975473	0.0969234	0
Nuak1	ENSMUSG00000020032	12286	CTGCGGATGCGCTGGCGGGCTGGCC	chr10:84374421-84374445_-	chr10:84373773-84375445_-	-	87243_m6a_chr10:84373773-84375445_-	0.697322	0.0922947	0.241109	0.913747	0.834469	0.815526	0.487381	0.820465	-0.110308	1	1	0.868586	0.00414218	0.136953	0
Nuak1	ENSMUSG00000020032	454895	ACGCAGCTGCGGATGCGCTGGCGGG	chr10:84374415-84374439_-	chr10:84373773-84375445_-	-	87242_m6a_chr10:84373773-84375445_-	1.11977	1.8435	-0.100389	0.310316	0.8028	1.08794	0.397866	-2.39897	-1.27601	1	1	0.309829	0.228612	0.843245	0
Nuak1	ENSMUSG00000020032	561936	GCAGAGACGCAGCTGCGGATGCGCT	chr10:84374409-84374433_-	chr10:84373773-84375445_-	-	87241_m6a_chr10:84373773-84375445_-	1.35476	-0.169145	3.06938	-1.17435		1.50866	0.0142486		-0.430997	0.482139	1	0.242704	0.583221	0.733706	0
Nuak1	ENSMUSG00000020032	320684	TTTTCAGCAGAGACGCAGCTGCGGA	chr10:84374403-84374427_-	chr10:84373773-84375445_-	-	87240_m6a_chr10:84373773-84375445_-	0.282524	1.42601	-0.494542		0.0356121	0.238502	0.889024			1	1	0.634177	0.918808	1	0
Nuak1	ENSMUSG00000020032	258682	AGGAAGTTTTCAGCAGAGACGCAGC	chr10:84374397-84374421_-	chr10:84373773-84375445_-	-	87239_m6a_chr10:84373773-84375445_-	0.136222	-0.935378	-1.08771	-3.11244	-0.0366617	1.79666	-0.278255			1	1	0.958577	0.717218	1	0
Nuak1	ENSMUSG00000020032	520064	AGCTGGAGGAAGTTTTCAGCAGAGA	chr10:84374391-84374415_-	chr10:84373773-84375445_-	-	87238_m6a_chr10:84373773-84375445_-	0.0775182	-1.56372	-0.0499289	-0.240584	-0.570915	-0.00825178	-0.33996	-0.484903		1	1	0.918079	0.980367	0.943635	0
Nuak1	ENSMUSG00000020032	46283	TCCTGAAGCTGGAGGAAGTTTTCAG	chr10:84374385-84374409_-	chr10:84373773-84375445_-	-	87237_m6a_chr10:84373773-84375445_-	-1.12893			-0.454788	-0.546804	0.198077	1.41574	0.0611174	0.2758	1	1	1	0.961378	0.147282	0
Nuak1	ENSMUSG00000020032	840355	TCAAAGTCCTGAAGCTGGAGGAAGT	chr10:84374379-84374403_-	chr10:84373773-84375445_-	-	87236_m6a_chr10:84373773-84375445_-			-0.917708	0.75656	0.680326		-0.633458	0.628894	-0.106824	1	1	1	0.0622744	0.528617	0
Nuak1	ENSMUSG00000020032	571	GGTGTCTCAAAGTCCTGAAGCTGGA	chr10:84374373-84374397_-	chr10:84373773-84375445_-	-	87235_m6a_chr10:84373773-84375445_-	0.789746	0.360517	1.12229	-0.0494133	0.556144	-0.00825178	0.589636	0.0611174	-0.69653	1	1	0.303691	0.896636	0.507395	0
Nuak1	ENSMUSG00000020032	390021	TTGTGTGGTGTCTCAAAGTCCTGAA	chr10:84374367-84374391_-	chr10:84373773-84375445_-	-	87234_m6a_chr10:84373773-84375445_-	0.628714	0.182482	0.454749	-0.728936	0.452338	-0.151507	0.232628	-1.84815		1	1	0.870313	0.905551	0.708717	0
Nuak1	ENSMUSG00000020032	251597	GGCCGGTTGTGTGGTGTCTCAAAGT	chr10:84374361-84374385_-	chr10:84373773-84375445_-	-	87233_m6a_chr10:84373773-84375445_-	1.21	1.21102	0.110937	1.51464	1.04831	1.16953	0.229928	-0.0380376	0.639402	1	0.645518	0.304965	0.0179128	0.142712	0
Nuak1	ENSMUSG00000020032	2842	GGCCGGGGCCGGTTGTGTGGTGTCT	chr10:84374355-84374379_-	chr10:84373773-84375445_-	-	87232_m6a_chr10:84373773-84375445_-	0.617754	0.157159	0.00612857	0.40804	0.891221	0.844109	0.221513	-0.850939	-0.501168	1	0.852535	0.906814	0.172701	0.818705	0
Nuak1	ENSMUSG00000020032	945684	TACTGGGGCCGGGGCCGGTTGTGTG	chr10:84374349-84374373_-	chr10:84373773-84375445_-	-	87231_m6a_chr10:84373773-84375445_-	-1.27483	-0.509097	0.354035	-1.3375	-1.30496	-0.773021	-1.23909	-0.367879	-0.48735	1	1	0.927928	0.994066	0.936559	0
Nuak1	ENSMUSG00000020032	933650	TTCAGGTACTGGGGCCGGGGCCGGT	chr10:84374343-84374367_-	chr10:84373773-84375445_-	-	87230_m6a_chr10:84373773-84375445_-	-0.110523	0.34812	-0.20663	-0.267872	-0.207289	-0.435477	-0.176079	0.177587	-0.0373201	1	1	0.965165	0.996651	0.515411	0
Nuak1	ENSMUSG00000020032	321869	AGCCGCTTCAGGTACTGGGGCCGGG	chr10:84374337-84374361_-	chr10:84373773-84375445_-	-	87229_m6a_chr10:84373773-84375445_-	1.2706	0.0758807	1.08691	0.833547	0.926067	1.71639	0.502208	-0.203892	-0.0111757	0.407233	0.0455616	0.332524	0.0762486	0.336434	0
Nuak1	ENSMUSG00000020032	733098	TCTGCCAGCCGCTTCAGGTACTGGG	chr10:84374331-84374355_-	chr10:84373773-84375445_-	-	87228_m6a_chr10:84373773-84375445_-	0.690835	0.610946	0.256687	0.742148	0.705302	0.125861	0.00148778	0.0467574	-0.057736	1	1	0.742989	0.502956	0.45015	0
Nuak1	ENSMUSG00000020032	153476	CTACTGTCTGCCAGCCGCTTCAGGT	chr10:84374325-84374349_-	chr10:84373773-84375445_-	-	87227_m6a_chr10:84373773-84375445_-	0.571498	-0.485615	0.0596462	-0.0481567	0.382045	0.602447	0.00430374	-1.06115	-0.253483	1	1	0.900094	0.810448	0.843596	0
Nuak1	ENSMUSG00000020032	788674	GAGAAGCTACTGTCTGCCAGCCGCT	chr10:84374319-84374343_-	chr10:84373773-84375445_-	-	87226_m6a_chr10:84373773-84375445_-	0.0464355	0.688197	-0.36805	0.240687	-0.198958	0.246473	-0.686154	-0.0969981	0.0206143	1	1	0.878113	0.949856	0.811859	0
Nuak1	ENSMUSG00000020032	667797	AGAAGGGAGAAGCTACTGTCTGCCA	chr10:84374313-84374337_-	chr10:84373773-84375445_-	-	87225_m6a_chr10:84373773-84375445_-	0.0183536	0.436224	0.314049	-0.134442	0.00809252	-0.160058	0.627735	-0.405557	-0.183728	1	1	0.951383	0.996496	0.477207	0
Nuak1	ENSMUSG00000020032	213248	TCAGTGAGAAGGGAGAAGCTACTGT	chr10:84374307-84374331_-	chr10:84373773-84375445_-	-	87224_m6a_chr10:84373773-84375445_-	0.811891	0.532564	-0.348169		0.576297	1.27422	1.23331			1	1	0.754486	0.228676	1	0
Nuak1	ENSMUSG00000020032	543141	TCCATATCAGTGAGAAGGGAGAAGC	chr10:84374301-84374325_-	chr10:84373773-84375445_-	-	87223_m6a_chr10:84373773-84375445_-	-0.376621	-0.0322373		-0.0755509	0.107656	-2.04535	0.227271		0.962764	1	1	0.934798	0.887753	0.174444	0
Nuak1	ENSMUSG00000020032	901118	ACATCGTCCATATCAGTGAGAAGGG	chr10:84374295-84374319_-	chr10:84373773-84375445_-	-	87222_m6a_chr10:84373773-84375445_-			0.677836		-0.705733	1.15507		1.60526		1	1	1	0.599731	1	0
Nuak1	ENSMUSG00000020032	693366	TGAGTCACATCGTCCATATCAGTGA	chr10:84374289-84374313_-	chr10:84373773-84375445_-	-	87221_m6a_chr10:84373773-84375445_-	-0.481547	0.979108	-0.7393	-2.42129	-0.43304	-0.0908731	-1.00812	-1.09057	1.98203	1	1	0.840839	0.913192	0.510995	0
Nuak1	ENSMUSG00000020032	375742	TACACCTGAGTCACATCGTCCATAT	chr10:84374283-84374307_-	chr10:84373773-84375445_-	-	87220_m6a_chr10:84373773-84375445_-	1.40903	0.790729	1.45198	0.615529	1.0819	1.17337	0.106577	0.0485517	0.260461	1	1	0.0545068	0.0650517	0.0736232	0
Nuak1	ENSMUSG00000020032	615861	TTCTTATACACCTGAGTCACATCGT	chr10:84374277-84374301_-	chr10:84373773-84375445_-	-	87219_m6a_chr10:84373773-84375445_-	1.23899		1.34735	0.432605	0.784651	-0.160058	0.415831	-0.271827	0.554112	1	1	0.0257306	0.703511	0.223162	0
Nuak1	ENSMUSG00000020032	435965	AGCGCTTTCTTATACACCTGAGTCA	chr10:84374271-84374295_-	chr10:84373773-84375445_-	-	87218_m6a_chr10:84373773-84375445_-	1.93117	1.93631	1.34637	0.536332	1.45571	1.44816	0.34269	0.0580656	1.1786	1	1	0.0147763	0.089513	0.126633	0
Nuak1	ENSMUSG00000020032	767171	ATCTCCAGCGCTTTCTTATACACCT	chr10:84374265-84374289_-	chr10:84373773-84375445_-	-	87217_m6a_chr10:84373773-84375445_-	0.389659	0.0917297	0.703207	-1.19695	-0.161095	0.547635	-0.516447	-1.79699	-1.00349	1	1	0.838406	0.871701	0.950663	0
Nuak1	ENSMUSG00000020032	878261	CTGCAGATCTCCAGCGCTTTCTTAT	chr10:84374259-84374283_-	chr10:84373773-84375445_-	-	87216_m6a_chr10:84373773-84375445_-	-0.307014	0.804273	1.27569	0.38305	-0.154377	0.264891	-0.970962	-0.0668224	-0.650693	1	1	0.525151	0.921568	0.914622	0
Nuak1	ENSMUSG00000020032	656165	AGCTTGCTGCAGATCTCCAGCGCTT	chr10:84374253-84374277_-	chr10:84373773-84375445_-	-	87215_m6a_chr10:84373773-84375445_-	1.04557	1.23825	1.42604	1.09901	0.970922	0.743612	-0.166051	0.660927	0.224865	1	1	0.0153554	0.0290976	0.204583	1
Nuak1	ENSMUSG00000020032	571655	TAGTTGAGCTTGCTGCAGATCTCCA	chr10:84374247-84374271_-	chr10:84373773-84375445_-	-	87214_m6a_chr10:84373773-84375445_-	1.60921	1.02496	1.55073	2.14244	1.79995	0.974505	0.666642	0.917785	-0.0424441	1	1	0.0267505	0.0424259	0.105702	2
Nuak1	ENSMUSG00000020032	415610	AAGGGCTAGTTGAGCTTGCTGCAGA	chr10:84374241-84374265_-	chr10:84373773-84375445_-	-	87213_m6a_chr10:84373773-84375445_-	1.73139	1.71524	0.852303	2.50809	1.72659	1.91416	0.672432	0.401312	0.455883	1	0.562727	0.0541985	0.0115397	0.0123339	1
Nuak1	ENSMUSG00000020032	47287	GCCCTGAAGGGCTAGTTGAGCTTGC	chr10:84374235-84374259_-	chr10:84373773-84375445_-	-	87212_m6a_chr10:84373773-84375445_-	0.956148	0.534558	-0.487223	0.356432	1.65269	1.26301	0.0148336	0.155775	0.987067	1	1	0.715777	0.139631	0.162082	0
Nuak1	ENSMUSG00000020032	183166	CTCTGTGCCCTGAAGGGCTAGTTGA	chr10:84374229-84374253_-	chr10:84373773-84375445_-	-	87211_m6a_chr10:84373773-84375445_-	0.592102	-0.411712	0.422905	0.873726	0.440911	0.259671	-0.105196		-1.71996	1	1	0.847145	0.502593	0.768149	0
Nuak1	ENSMUSG00000020032	870889	CCCATCCTCTGTGCCCTGAAGGGCT	chr10:84374223-84374247_-	chr10:84373773-84375445_-	-	87210_m6a_chr10:84373773-84375445_-	-0.393046	1.2032	1.37711	0.0621	-0.588983	0.218098	-0.990119	-0.223105	-0.0333035	1	1	0.434854	0.937055	0.851147	0
Nuak1	ENSMUSG00000020032	626565	ACCCATCCCATCCTCTGTGCCCTGA	chr10:84374217-84374241_-	chr10:84373773-84375445_-	-	87209_m6a_chr10:84373773-84375445_-	0.456415	1.13021	0.894269	1.48997	0.963079	0.844771	0.514104	0.729494	0.845056	1	1	0.206353	0.0508823	0.00923413	0
Nuak1	ENSMUSG00000020032	933879	CCACCCACCCATCCCATCCTCTGTG	chr10:84374211-84374235_-	chr10:84373773-84375445_-	-	87208_m6a_chr10:84373773-84375445_-	-0.917576	-0.144244	-0.401463	-0.165836	-0.542182	-0.23004	-0.491331	-0.189266	-0.447887	1	1	0.980327	0.990667	0.970198	0
Nuak1	ENSMUSG00000020032	922075	CCTCACCCACCCACCCATCCCATCC	chr10:84374205-84374229_-	chr10:84373773-84375445_-	-	87207_m6a_chr10:84373773-84375445_-	-1.5468	-0.298723	-0.138747	-0.410893	-1.22894	-0.866966	-1.29607	0.000813593	-0.225936	1	1	0.949078	0.985548	0.831038	0
Nuak1	ENSMUSG00000020032	596704	CCTTGGCCTCACCCACCCACCCATC	chr10:84374199-84374223_-	chr10:84373773-84375445_-	-	87206_m6a_chr10:84373773-84375445_-	0.000234548	-0.329592	-0.722219	-0.203625	-0.224387	0.323435	0.0217589	-0.632409	-0.623337	1	1	0.978529	0.955638	0.898407	0
Nuak1	ENSMUSG00000020032	573279	CTTCTCCCTTGGCCTCACCCACCCA	chr10:84374193-84374217_-	chr10:84373773-84375445_-	-	87205_m6a_chr10:84373773-84375445_-	-0.266247	-0.23314	-0.161268	0.456048	0.270461	0.183331	0.403468	0.321654	0.104728	1	1	0.999328	0.945347	0.042973	0
Nuak1	ENSMUSG00000020032	284338	GTTCCCCTTCTCCCTTGGCCTCACC	chr10:84374187-84374211_-	chr10:84373773-84375445_-	-	87204_m6a_chr10:84373773-84375445_-	0.120801	-0.187958	-0.470464	0.352032	0.0578378	0.713867	0.346711	-0.216951	-0.233909	1	1	0.978851	0.745882	0.550273	0
Nuak1	ENSMUSG00000020032	751629	AGTTCTGTTCCCCTTCTCCCTTGGC	chr10:84374181-84374205_-	chr10:84373773-84375445_-	-	87203_m6a_chr10:84373773-84375445_-	-0.480403	0.14665	0.0584012	0.0528676	-0.341948	-0.0742596	-0.388983	0.154864	0.198374	1	1	0.966303	0.984583	0.508352	0
Nuak1	ENSMUSG00000020032	248228	AGGCTGAGTTCTGTTCCCCTTCTCC	chr10:84374175-84374199_-	chr10:84373773-84375445_-	-	87202_m6a_chr10:84373773-84375445_-	0.456799	0.906069	0.528863	1.13004	0.502121	0.542009	0.103783	0.301018	0.332718	1	1	0.484333	0.21551	0.0357384	0
Nuak1	ENSMUSG00000020032	534365	GCCTTCAGGCTGAGTTCTGTTCCCC	chr10:84374169-84374193_-	chr10:84373773-84375445_-	-	87201_m6a_chr10:84373773-84375445_-	1.65062	1.59202	1.5254	1.90039	1.31163	1.37065	0.882708	0.410012	0.292738	0.0014852	0.00746422	0.000701126	0.0166047	0.0485043	0
Nuak1	ENSMUSG00000020032	138273	TAACCAGCCTTCAGGCTGAGTTCTG	chr10:84374163-84374187_-	chr10:84373773-84375445_-	-	87200_m6a_chr10:84373773-84375445_-	2.17471	2.33237	1.7109	0.367235	0.918878	1.37422	0.147924			0.000692561	1	0.00809217	0.170535	1	0
Nuak1	ENSMUSG00000020032	337074	AAGAGGTAACCAGCCTTCAGGCTGA	chr10:84374157-84374181_-	chr10:84373773-84375445_-	-	87199_m6a_chr10:84373773-84375445_-	1.07327		0.40473		-0.0104608					1	1	0.394871	1	1	0
Nuak1	ENSMUSG00000020032	701309	CCAGCAAAGAGGTAACCAGCCTTCA	chr10:84374151-84374175_-	chr10:84373773-84375445_-	-	87198_m6a_chr10:84373773-84375445_-	0.222767		-0.524299		0.0658797	0.487941	0.297055	0.130206	1.40756	1	1	0.857065	0.776336	0.131263	0
Nuak1	ENSMUSG00000020032	693123	CCTTGACCAGCAAAGAGGTAACCAG	chr10:84374145-84374169_-	chr10:84373773-84375445_-	-	87197_m6a_chr10:84373773-84375445_-	0.65589	1.01524	-0.00579461	0.864149	0.735903	0.149613	0.227271	0.532039	-0.76047	1	1	0.580845	0.409697	0.493598	0
Nuak1	ENSMUSG00000020032	594950	CCGTTGCCTTGACCAGCAAAGAGGT	chr10:84374139-84374163_-	chr10:84373773-84375445_-	-	87196_m6a_chr10:84373773-84375445_-	0.765921	0.671657	-2.21582	0.584523	0.625935	1.18807	-0.0107531	-0.48293	-1.84098	1	0.878818	0.769117	0.147653	0.852399	0
Nuak1	ENSMUSG00000020032	391052	CCCAATCCGTTGCCTTGACCAGCAA	chr10:84374133-84374157_-	chr10:84373773-84375445_-	-	87195_m6a_chr10:84373773-84375445_-	1.43486	0.164935	0.825111	0.730789	1.11173	1.24402	0.164835	-0.795274	-0.835816	1	0.706149	0.332885	0.041127	0.860543	0
Nuak1	ENSMUSG00000020032	642141	TCCTTTCCCAATCCGTTGCCTTGAC	chr10:84374127-84374151_-	chr10:84373773-84375445_-	-	87194_m6a_chr10:84373773-84375445_-	1.04908	1.38551	1.29734	1.03935	0.864979	1.13865	-0.236761	0.131451	0.402222	0.303891	0.80048	0.0127113	0.0129035	0.311757	1
Nuak1	ENSMUSG00000020032	775044	TACTAGTCCTTTCCCAATCCGTTGC	chr10:84374121-84374145_-	chr10:84373773-84375445_-	-	87193_m6a_chr10:84373773-84375445_-	-0.0568073	0.86227	0.657081	-0.0770999	0.00907683	0.46515	-0.726012	0.567378	0.111554	1	1	0.664127	0.927937	0.507693	0
Nuak1	ENSMUSG00000020032	437948	AGACATTACTAGTCCTTTCCCAATC	chr10:84374115-84374139_-	chr10:84373773-84375445_-	-	87192_m6a_chr10:84373773-84375445_-	0.0342343	0.115387	-0.395928	-0.673519	0.0590573	-0.0236837	-0.157934	0.615181	-0.313967	1	1	0.976546	0.957085	0.432668	0
Nuak1	ENSMUSG00000020032	857756	CAGGCCAGACATTACTAGTCCTTTC	chr10:84374109-84374133_-	chr10:84373773-84375445_-	-	87191_m6a_chr10:84373773-84375445_-	0.33126	0.979108	0.157316		-0.283643	-0.7388	-0.929612		-0.734058	1	1	0.678537	0.931255	0.962422	0
Nuak1	ENSMUSG00000020032	388198	ACTGGCCAGGCCAGACATTACTAGT	chr10:84374103-84374127_-	chr10:84373773-84375445_-	-	87190_m6a_chr10:84373773-84375445_-	-0.402629		0.066417	-0.541451	0.993295	0.284294	-0.105196			1	1	0.908418	0.704276	1	0
Nuak1	ENSMUSG00000020032	886420	GTGTAAACTGGCCAGGCCAGACATT	chr10:84374097-84374121_-	chr10:84373773-84375445_-	-	87189_m6a_chr10:84373773-84375445_-	0.0569021		-0.100389	-0.728936	1.17097			0.427687	-0.106824	1	1	0.961446	0.598917	0.321468	0
Nuak1	ENSMUSG00000020032	647195	AAGGCTGTGTAAACTGGCCAGGCCA	chr10:84374091-84374115_-	chr10:84373773-84375445_-	-	87188_m6a_chr10:84373773-84375445_-	0.836035	0.431927	0.422905	-0.0494133	0.677097	-0.680641	-0.193375	-1.71003	2.11382	1	1	0.650428	0.849999	0.475354	0
Nuak1	ENSMUSG00000020032	304249	TGACTCAAGGCTGTGTAAACTGGCC	chr10:84374085-84374109_-	chr10:84373773-84375445_-	-	87187_m6a_chr10:84373773-84375445_-	1.18529	1.69364	-0.611074	0.491649	0.689171		-0.404252	-1.26342	0.109864	0.742714	1	0.434052	0.316286	0.835191	0
Nuak1	ENSMUSG00000020032	121301	AGGTGCTGACTCAAGGCTGTGTAAA	chr10:84374079-84374103_-	chr10:84373773-84375445_-	-	87186_m6a_chr10:84373773-84375445_-	1.09577	0.534558	1.0544	-0.235116	1.2937	0.948037	0.321073	0.424861	-1.74925	0.789725	1	0.136417	0.393456	0.655212	0
Nuak1	ENSMUSG00000020032	501970	CCTTTTAGGTGCTGACTCAAGGCTG	chr10:84374073-84374097_-	chr10:84373773-84375445_-	-	87185_m6a_chr10:84373773-84375445_-	1.03692	1.81008	1.73196	0.889318	1.70543	1.44816	-0.156053	-0.0717334	-0.35134	0.552942	0.926093	0.0334375	0.0381368	0.922856	1
Nuak1	ENSMUSG00000020032	574793	TCTATCCCTTTTAGGTGCTGACTCA	chr10:84374067-84374091_-	chr10:84373773-84375445_-	-	87184_m6a_chr10:84373773-84375445_-	1.6014	0.448138	0.753613	-0.614869	1.31982	0.367616	0.480463	0.327782	0.426379	1	1	0.231854	0.604367	0.00559426	0
Nuak1	ENSMUSG00000020032	206381	ATGGTTTCTATCCCTTTTAGGTGCT	chr10:84374061-84374085_-	chr10:84373773-84375445_-	-	87183_m6a_chr10:84373773-84375445_-	0.96414	-0.868477	1.74207	0.310316	1.06506	1.99862	0.924068		-0.558889	1	1	0.505401	0.172504	0.420137	0
Nuak1	ENSMUSG00000020032	765072	TAAAGAATGGTTTCTATCCCTTTTA	chr10:84374055-84374079_-	chr10:84373773-84375445_-	-	87182_m6a_chr10:84373773-84375445_-	-0.753748			3.99589	0.373431	0.348788	0.559686	1.32752		1	1	1	0.239371	0.122126	0
Nuak1	ENSMUSG00000020032	656472	AACTGGTAAAGAATGGTTTCTATCC	chr10:84374049-84374073_-	chr10:84373773-84375445_-	-	87181_m6a_chr10:84373773-84375445_-	-0.262326	0.851657		1.41235	0.373799	-0.160058	0.156611	1.22636	2.69717	1	1	0.67014	0.487808	0.102224	0
Nuak1	ENSMUSG00000020032	567190	AGGCAGAACTGGTAAAGAATGGTTT	chr10:84374043-84374067_-	chr10:84373773-84375445_-	-	87180_m6a_chr10:84373773-84375445_-	1.15301	0.189559		2.30027	-0.0790454	-0.411971	0.580822		0.305369	1	1	0.469117	0.468196	0.094432	0
Nuak1	ENSMUSG00000020032	62539	TGGCACAGGCAGAACTGGTAAAGAA	chr10:84374037-84374061_-	chr10:84373773-84375445_-	-	87179_m6a_chr10:84373773-84375445_-	0.170013	0.0233093	0.186133	0.911864	0.570255	-0.0895347	-0.406218	0.253049	0.631052	1	1	0.994675	0.573664	0.318721	0
Nuak1	ENSMUSG00000020032	749131	TCTAACTGGCACAGGCAGAACTGGT	chr10:84374031-84374055_-	chr10:84373773-84375445_-	-	87178_m6a_chr10:84373773-84375445_-	0.987309	0.664013	1.43018	-0.401447	1.36477	0.355377	-0.267119	1.68866	7.11054	1	1	0.105699	0.559383	0.16273	0
Nuak1	ENSMUSG00000020032	856883	CCCCATTCTAACTGGCACAGGCAGA	chr10:84374025-84374049_-	chr10:84373773-84375445_-	-	87177_m6a_chr10:84373773-84375445_-	0.173	0.994779	1.11877	0.567052	0.370955	-0.107192	-1.53996	-0.0717334	-0.273242	1	1	0.344038	0.830295	0.845395	0
Nuak1	ENSMUSG00000020032	490333	TAGGACCCCCATTCTAACTGGCACA	chr10:84374019-84374043_-	chr10:84373773-84375445_-	-	87176_m6a_chr10:84373773-84375445_-	0.786277	0.389832	-0.727956	-0.00909341	0.44241	1.09656	0.332415	-0.280981	-1.68952	1	1	0.797654	0.517776	0.76841	0
Nuak1	ENSMUSG00000020032	156303	GCCAGTTAGGACCCCCATTCTAACT	chr10:84374013-84374037_-	chr10:84373773-84375445_-	-	87175_m6a_chr10:84373773-84375445_-	1.36787	2.27041	0.272605	0.759884	0.681928	0.475653	0.245759	-2.06397	0.701436	1	1	0.180323	0.157013	0.644264	0
Nuak1	ENSMUSG00000020032	224912	GGGAATGCCAGTTAGGACCCCCATT	chr10:84374007-84374031_-	chr10:84373773-84375445_-	-	87174_m6a_chr10:84373773-84375445_-	0.892977	0.540258	0.747952	0.593957	0.996712	1.19805	-0.143621	-0.800354	0.863802	1	1	0.21075	0.0755199	0.514075	0
Nuak1	ENSMUSG00000020032	923317	TCACCTGGGAATGCCAGTTAGGACC	chr10:84374001-84374025_-	chr10:84373773-84375445_-	-	87173_m6a_chr10:84373773-84375445_-	-0.582357	0.157184	0.245824	-0.322709	-0.233898	0.659413	-0.777419		-0.0671329	1	1	0.939462	0.871318	0.774624	0
Nuak1	ENSMUSG00000020032	38300	GAGATGTCACCTGGGAATGCCAGTT	chr10:84373995-84374019_-	chr10:84373773-84375445_-	-	87172_m6a_chr10:84373773-84375445_-	0.365612	0.119777	0.753613	0.192585	0.524306	1.58472	2.20858	0.137327	-2.07869	1	0.732757	0.814758	0.311879	0.472473	0
Nuak1	ENSMUSG00000020032	415286	CCCCGTGAGATGTCACCTGGGAATG	chr10:84373989-84374013_-	chr10:84373773-84375445_-	-	87171_m6a_chr10:84373773-84375445_-	1.85104	2.16359	2.47476	1.85269	1.54319	1.14551	0.344296	0.100881	-0.0202568	9.13284e-10	0.000518899	0.0067086	0.02018	0.149401	1
Nuak1	ENSMUSG00000020032	246253	CACCTCCCCCGTGAGATGTCACCTG	chr10:84373983-84374007_-	chr10:84373773-84375445_-	-	87170_m6a_chr10:84373773-84375445_-	0.544571	0.462356	0.877883	0.815476	0.527471	0.645587	-0.0689869	0.318809	0.259343	1	0.949417	0.489235	0.121748	0.139758	0
Nuak1	ENSMUSG00000020032	789659	CAACACCACCTCCCCCGTGAGATGT	chr10:84373977-84374001_-	chr10:84373773-84375445_-	-	87169_m6a_chr10:84373773-84375445_-	-0.338961	0.279436	0.507258	0.29622	-0.0969403	-0.21225	0.0247388	0.669715	0.546299	1	1	0.899533	0.962567	0.0834475	0
Nuak1	ENSMUSG00000020032	383917	GCTGGCCAACACCACCTCCCCCGTG	chr10:84373971-84373995_-	chr10:84373773-84375445_-	-	87168_m6a_chr10:84373773-84375445_-	0.365862	-0.290076	-0.0692505	-0.258679	-0.0164878	0.17871	0.164306	-0.584417	-0.570414	1	1	0.958002	0.976147	0.839098	0
Nuak1	ENSMUSG00000020032	673520	TTTCTTGCTGGCCAACACCACCTCC	chr10:84373965-84373989_-	chr10:84373773-84375445_-	-	87167_m6a_chr10:84373773-84375445_-	0.043687	0.539009	0.500472	-0.126805	-0.474961	-0.338792	-0.102405	0.226366	0.208734	1	1	0.880169	0.992878	0.191563	0
Nuak1	ENSMUSG00000020032	668729	TTCCCATTTCTTGCTGGCCAACACC	chr10:84373959-84373983_-	chr10:84373773-84375445_-	-	87166_m6a_chr10:84373773-84375445_-	0.741201	1.66007	1.26541	0.824639	0.697449	0.714799	-0.29801	0.176964	-0.599789	0.00386184	0.452449	0.0768706	0.0156828	0.794334	0
Nuak1	ENSMUSG00000020032	263867	TGCCGCTTCCCATTTCTTGCTGGCC	chr10:84373953-84373977_-	chr10:84373773-84375445_-	-	87165_m6a_chr10:84373773-84375445_-	0.941944	0.341328	0.381486	0.665494	0.651608	1.27053	-0.0899086	-0.101911	0.222313	0.974624	0.229064	0.622835	0.120466	0.441718	0
Nuak1	ENSMUSG00000020032	731409	CCATAATGCCGCTTCCCATTTCTTG	chr10:84373947-84373971_-	chr10:84373773-84375445_-	-	87164_m6a_chr10:84373773-84375445_-	0.407006	1.22253	0.63204	0.951485	0.831416	0.414292	0.275195	0.08917	0.22937	0.60988	0.788426	0.323847	0.166323	0.0334411	0
Nuak1	ENSMUSG00000020032	285830	CCTTCCCCATAATGCCGCTTCCCAT	chr10:84373941-84373965_-	chr10:84373773-84375445_-	-	87163_m6a_chr10:84373773-84375445_-	1.12123	1.57741	1.42483	2.02981	0.820249	0.801643	0.628368	0.422817	0.213836	0.0175146	0.141098	0.0152475	0.11553	0.0348641	0
Nuak1	ENSMUSG00000020032	884698	ACACACCCTTCCCCATAATGCCGCT	chr10:84373935-84373959_-	chr10:84373773-84375445_-	-	87162_m6a_chr10:84373773-84375445_-	-0.781849	0.520896	0.485217	0.255385	-0.716333	-0.28801	-1.21729	0.166179	0.117346	1	1	0.835948	0.944954	0.71415	0
Nuak1	ENSMUSG00000020032	277779	TAGGAAACACACCCTTCCCCATAAT	chr10:84373929-84373953_-	chr10:84373773-84375445_-	-	87161_m6a_chr10:84373773-84375445_-	0.596061	0.390619	0.906559	0.790362	0.477816	0.588338	0.128821	-0.209424	0.662486	1	1	0.484262	0.208758	0.255315	0
Nuak1	ENSMUSG00000020032	529392	GACTTCTAGGAAACACACCCTTCCC	chr10:84373923-84373947_-	chr10:84373773-84375445_-	-	87160_m6a_chr10:84373773-84375445_-	0.582884	0.624733	0.947024	0.678153	0.52563	0.569228	0.141584	0.362383	0.152239	1	1	0.250236	0.144385	0.0439516	0
Nuak1	ENSMUSG00000020032	253707	CTAGATGACTTCTAGGAAACACACC	chr10:84373917-84373941_-	chr10:84373773-84375445_-	-	87159_m6a_chr10:84373773-84375445_-	2.7876		0.066417	-0.233352	0.471505	-1.12958	-0.924887		0.295074	0.102499	1	0.330355	0.891222	0.648611	0
Nuak1	ENSMUSG00000020032	761688	AAACATCTAGATGACTTCTAGGAAA	chr10:84373911-84373935_-	chr10:84373773-84375445_-	-	87158_m6a_chr10:84373773-84375445_-	0.282524	-1.25255	-0.348169		-0.956684	-0.331978	1.21071	0.6641		1	1	0.930216	0.916988	0.0896265	0
Nuak1	ENSMUSG00000020032	653175	CTCCAGAAACATCTAGATGACTTCT	chr10:84373905-84373929_-	chr10:84373773-84375445_-	-	87157_m6a_chr10:84373773-84375445_-	1.21311	0.506007		1.17883	-0.0790454	-0.262848	-0.111827		-0.9136	1	1	0.313172	0.679936	0.786504	0
Nuak1	ENSMUSG00000020032	371319	CCCCTCCTCCAGAAACATCTAGATG	chr10:84373899-84373923_-	chr10:84373773-84375445_-	-	87156_m6a_chr10:84373773-84375445_-	0.411884	0.565512	0.423318	0.864658	0.340263	0.772922	0.362606	0.356413	0.140972	1	1	0.957031	0.248367	0.0281262	0
Nuak1	ENSMUSG00000020032	224008	TTTCTTCCCCTCCTCCAGAAACATC	chr10:84373893-84373917_-	chr10:84373773-84375445_-	-	87155_m6a_chr10:84373773-84375445_-	0.173077	0.107476	-0.159662	0.741572	0.134349	0.488561	0.220925	0.0409648	-0.450662	1	1	0.985483	0.63758	0.595904	0
Nuak1	ENSMUSG00000020032	645970	TCAGTCTTTCTTCCCCTCCTCCAGA	chr10:84373887-84373911_-	chr10:84373773-84375445_-	-	87154_m6a_chr10:84373773-84375445_-	0.0509942	0.538403	0.333187	0.618745	0.205359	0.0664473	0.352891	0.173206	0.377364	1	1	0.922938	0.849478	0.0204254	0
Nuak1	ENSMUSG00000020032	286405	ATGGTCTCAGTCTTTCTTCCCCTCC	chr10:84373881-84373905_-	chr10:84373773-84375445_-	-	87153_m6a_chr10:84373773-84375445_-	0.502651	0.0711005	0.414855	0.60047	0.51945	1.11766	0.333436	0.332524	0.359014	1	1	0.92275	0.180816	0.000308961	0
Nuak1	ENSMUSG00000020032	263080	AAGCAGATGGTCTCAGTCTTTCTTC	chr10:84373875-84373899_-	chr10:84373773-84375445_-	-	87152_m6a_chr10:84373773-84375445_-	0.609123	-1.04942	0.674883	0.5129	0.617989	1.53798	0.552807	-0.309979	-1.46342	1	0.418576	0.782463	0.19018	0.717671	0
Nuak1	ENSMUSG00000020032	4527	CATCCAAAGCAGATGGTCTCAGTCT	chr10:84373869-84373893_-	chr10:84373773-84375445_-	-	87151_m6a_chr10:84373773-84375445_-	0.204495	0.343409	0.137683	-0.284222	0.553257	0.241707	-0.0746508			1	1	0.988683	0.858679	1	0
Nuak1	ENSMUSG00000020032	612926	TGGATCCATCCAAAGCAGATGGTCT	chr10:84373863-84373887_-	chr10:84373773-84375445_-	-	87150_m6a_chr10:84373773-84375445_-		0.851657			0.268801	1.65324	-0.924887	-0.484903	-0.627684	0.664272	0.543293	1	0.321441	0.982367	0
Nuak1	ENSMUSG00000020032	403801	TGCTAATGGATCCATCCAAAGCAGA	chr10:84373857-84373881_-	chr10:84373773-84375445_-	-	87149_m6a_chr10:84373773-84375445_-	0.891961		0.306983	0.35736	0.176975	0.748466	-1.38246	2.39308	-0.106824	1	1	0.527064	0.690845	0.40342	0
Nuak1	ENSMUSG00000020032	704266	CAGGCTTGCTAATGGATCCATCCAA	chr10:84373851-84373875_-	chr10:84373773-84375445_-	-	87148_m6a_chr10:84373773-84375445_-	0.913114	0.532564	1.36264	-0.454788	0.704145	-0.299077	-0.887643	0.0478184	1.12877	0.424276	1	0.161719	0.863158	0.437522	0
Nuak1	ENSMUSG00000020032	794379	TCAGACCAGGCTTGCTAATGGATCC	chr10:84373845-84373869_-	chr10:84373773-84375445_-	-	87147_m6a_chr10:84373773-84375445_-	-0.22965	0.351306	1.07104	0.303505	-0.271916	0.584736	-0.823184	1.01267	0.555592	1	1	0.696104	0.834357	0.344245	0
Nuak1	ENSMUSG00000020032	702217	GTGTAGTCAGACCAGGCTTGCTAAT	chr10:84373839-84373863_-	chr10:84373773-84375445_-	-	87146_m6a_chr10:84373773-84375445_-	0.752867	2.33286	0.881805	0.500763	0.567914	0.894125	-0.161557	-0.14475	-1.69598	0.0667536	1	0.151038	0.201036	0.835994	0
Nuak1	ENSMUSG00000020032	445899	GCCCCTGTGTAGTCAGACCAGGCTT	chr10:84373833-84373857_-	chr10:84373773-84375445_-	-	87145_m6a_chr10:84373773-84375445_-	1.33323	1.81812	0.813788	1.27901	1.2365	1.5219	0.409233	-0.891628	-0.486764	0.0517096	0.0702098	0.0690097	0.00577919	0.751065	0
Nuak1	ENSMUSG00000020032	712759	TTGCTAGCCCCTGTGTAGTCAGACC	chr10:84373827-84373851_-	chr10:84373773-84375445_-	-	87144_m6a_chr10:84373773-84375445_-	0.259092	1.15238	-0.00733239	0.496882	0.0604056	0.14249	-0.191162	-0.37817	0.0930942	1	1	0.650331	0.919845	0.807728	0
Nuak1	ENSMUSG00000020032	776175	GGAGTCTTGCTAGCCCCTGTGTAGT	chr10:84373821-84373845_-	chr10:84373773-84375445_-	-	87143_m6a_chr10:84373773-84375445_-	0.426425	0.735552	0.557444	0.356325	0.238145	0.46676	-0.509194	0.292574	-0.22096	1	1	0.68754	0.93966	0.692596	0
Nuak1	ENSMUSG00000020032	294704	GTTGCTGGAGTCTTGCTAGCCCCTG	chr10:84373815-84373839_-	chr10:84373773-84375445_-	-	87142_m6a_chr10:84373773-84375445_-	1.30961	1.31171	1.83398	1.93363	0.917787	1.07464	0.540562	0.459717	0.563092	0.247164	0.684602	0.0193537	0.0657184	0.00175348	0
Nuak1	ENSMUSG00000020032	571261	ACTCAGGTTGCTGGAGTCTTGCTAG	chr10:84373809-84373833_-	chr10:84373773-84375445_-	-	87141_m6a_chr10:84373773-84375445_-	1.73475	1.67791	1.83472	1.53244	1.49732	1.13878	0.421323	0.796499	0.251723	0.0905099	0.646528	0.000828327	0.0102839	0.0453612	0
Nuak1	ENSMUSG00000020032	336001	ATTCACACTCAGGTTGCTGGAGTCT	chr10:84373803-84373827_-	chr10:84373773-84375445_-	-	87140_m6a_chr10:84373773-84375445_-	1.39977	0.351306	1.66993	0.426965	1.31373	1.43818	0.513588	-0.301677	-0.204952	0.743319	1	0.164052	0.117881	0.486572	0
Nuak1	ENSMUSG00000020032	746351	TCACCAATTCACACTCAGGTTGCTG	chr10:84373797-84373821_-	chr10:84373773-84375445_-	-	87139_m6a_chr10:84373773-84375445_-	-0.244	0.448138	0.132561	0.421294	0.284743	0.348788	-0.644349	1.11015	-0.842982	1	1	0.937661	0.976257	0.566779	0
Nuak1	ENSMUSG00000020032	379521	AATTGATCACCAATTCACACTCAGG	chr10:84373791-84373815_-	chr10:84373773-84375445_-	-	87138_m6a_chr10:84373773-84375445_-	2.28561	-0.280394	1.7109	1.16917	0.880803	0.479884	0.0142486		0.0267821	0.854931	1	0.256124	0.12671	0.0701691	0
Nuak1	ENSMUSG00000020032	528603	ATTACCAATTGATCACCAATTCACA	chr10:84373785-84373809_-	chr10:84373773-84375445_-	-	87137_m6a_chr10:84373773-84375445_-	0.345402							-1.35141	3.22079	1	1	1	1	0.37557	0
Nuak1	ENSMUSG00000020032	28957	ACAGACATTACCAATTGATCACCAA	chr10:84373779-84373803_-	chr10:84373773-84375445_-	-	87136_m6a_chr10:84373773-84375445_-	0.635587			-0.947144	-1.05364	-0.361734		0.899231		1	1	1	0.98711	1	0
Nuak1	ENSMUSG00000020032	759278	CACAGTACAGACATTACCAATTGAT	chr10:84373773-84373797_-	chr10:84373773-84375445_-	-	87135_m6a_chr10:84373773-84375445_-			-0.100389	1.00207	0.136307		0.880946		0.76807	1	1	1	0.468425	0.0215603	0
Dusp3	ENSMUSG00000003518	530265	CTTGCAATTCTCCAAATGGAGGTCC	chr11:101973893-101973917_-	chr11:101973359-101973919_-	-	165083_m6a_chr11:101973359-101973919_-	0.498938		0.306983	0.287331	-0.904293	0.677834	-0.0919986		1.24342	1	1	0.748678	0.585992	0.317246	0
Dusp3	ENSMUSG00000003518	569851	AAAATCCTTGCAATTCTCCAAATGG	chr11:101973887-101973911_-	chr11:101973359-101973919_-	-	165082_m6a_chr11:101973359-101973919_-	0.108906	1.48566	-0.494542		-0.186873	-0.967432	0.14822			1	1	0.578343	0.840944	1	0
Dusp3	ENSMUSG00000003518	663049	CAGGATAAAATCCTTGCAATTCTCC	chr11:101973881-101973905_-	chr11:101973359-101973919_-	-	165081_m6a_chr11:101973359-101973919_-	0.0358917	0.221593	-0.107875	-1.63977	-0.514635	-0.299077	1.00375	1.3388	0.515176	1	1	0.9788	0.925876	0.0387055	0
Dusp3	ENSMUSG00000003518	503835	ATAATTCAGGATAAAATCCTTGCAA	chr11:101973875-101973899_-	chr11:101973359-101973919_-	-	165080_m6a_chr11:101973359-101973919_-	-0.12535			1.19118	-0.452744	-0.577429		-0.859819	0.0267821	1	1	1	0.551896	0.786953	0
Dusp3	ENSMUSG00000003518	804841	AACACTATAATTCAGGATAAAATCC	chr11:101973869-101973893_-	chr11:101973359-101973919_-	-	165079_m6a_chr11:101973359-101973919_-	-0.12535			0.75656	-0.797124		-1.02949	0.495331		1	1	1	0.563892	0.657347	0
Dusp3	ENSMUSG00000003518	50410	CTCACCAACACTATAATTCAGGATA	chr11:101973863-101973887_-	chr11:101973359-101973919_-	-	165078_m6a_chr11:101973359-101973919_-	2.40798		0.946512		0.00778409	1.15507	-0.724035			0.214027	1	0.1766	0.290455	1	0
Dusp3	ENSMUSG00000003518	19972	CTTGAACTCACCAACACTATAATTC	chr11:101973857-101973881_-	chr11:101973359-101973919_-	-	165077_m6a_chr11:101973359-101973919_-	-1.71968				-1.31823				1.08225	1	1	1	1	1	0
Dusp3	ENSMUSG00000003518	129279	TGATGACTTGAACTCACCAACACTA	chr11:101973851-101973875_-	chr11:101973359-101973919_-	-	165076_m6a_chr11:101973359-101973919_-	2.43795		-1.92117	-0.613173	-0.0621584	0.926486	0.239463	0.0611174		1	1	0.534874	0.542281	0.476949	0
Dusp3	ENSMUSG00000003518	636546	TTGGCGTGATGACTTGAACTCACCA	chr11:101973845-101973869_-	chr11:101973359-101973919_-	-	165075_m6a_chr11:101973359-101973919_-	0.46387	1.00083	1.11914	0.0556969	-0.0439743	0.385391	-0.402992	-0.263221	-0.250098	1	1	0.106741	0.514722	0.994174	0
Dusp3	ENSMUSG00000003518	87345	AAGCACTTGGCGTGATGACTTGAAC	chr11:101973839-101973863_-	chr11:101973359-101973919_-	-	165074_m6a_chr11:101973359-101973919_-	0.775927	0.733004	0.372431	0.770877	0.687339	0.272233	0.111184	-0.114652	-0.274592	1	1	0.209781	0.0521909	0.91555	0
Dusp3	ENSMUSG00000003518	403963	GATGGCAAGCACTTGGCGTGATGAC	chr11:101973833-101973857_-	chr11:101973359-101973919_-	-	165073_m6a_chr11:101973359-101973919_-	1.3062	1.14979	1.23279	0.0585283	0.691138	0.523651	0.241886	0.198761	-0.110308	1	1	0.00189687	0.134516	0.605054	0
Dusp3	ENSMUSG00000003518	828307	AACCAGGATGGCAAGCACTTGGCGT	chr11:101973827-101973851_-	chr11:101973359-101973919_-	-	165072_m6a_chr11:101973359-101973919_-	-0.366417	0.475708	0.440115	-0.276756	-0.848748	-0.893993	-0.785541	0.234105	0.237679	1	1	0.814728	0.972457	0.729238	0
Dusp3	ENSMUSG00000003518	888054	AATAGCAACCAGGATGGCAAGCACT	chr11:101973821-101973845_-	chr11:101973359-101973919_-	-	165071_m6a_chr11:101973359-101973919_-	0.432809	0.887464	1.20672	-2.87694	-0.406052	-0.958837	-1.24463	-0.309979	-0.650976	1	1	0.132516	0.91301	0.957768	0
Dusp3	ENSMUSG00000003518	408351	TCTTAGAATAGCAACCAGGATGGCA	chr11:101973815-101973839_-	chr11:101973359-101973919_-	-	165070_m6a_chr11:101973359-101973919_-	-0.341251		-0.2166	0.873726	-0.797493		1.21071		1.9903	1	1	0.974524	0.537785	0.0832271	0
Dusp3	ENSMUSG00000003518	674220	AATTATTCTTAGAATAGCAACCAGG	chr11:101973809-101973833_-	chr11:101973359-101973919_-	-	165069_m6a_chr11:101973359-101973919_-	-1.10252		0.422905		0.43737			2.29176		1	1	0.764951	1	1	0
Dusp3	ENSMUSG00000003518	681883	CCTCCTAATTATTCTTAGAATAGCA	chr11:101973803-101973827_-	chr11:101973359-101973919_-	-	165068_m6a_chr11:101973359-101973919_-	0.43905	-0.344674	-0.890731	0.144218	0.309424	0.637748	0.583054	1.63212	2.14392	1	1	0.906782	0.12974	0.0521147	0
Dusp3	ENSMUSG00000003518	802628	GTTCCTCCTCCTAATTATTCTTAGA	chr11:101973797-101973821_-	chr11:101973359-101973919_-	-	165067_m6a_chr11:101973359-101973919_-	-0.355681	0.340572	0.2559	0.12816	-0.380295	-0.0927801	-0.0537131	0.183955	0.195609	1	1	0.90148	0.885948	0.646494	0
Dusp3	ENSMUSG00000003518	444172	GGCTAGGTTCCTCCTCCTAATTATT	chr11:101973791-101973815_-	chr11:101973359-101973919_-	-	165066_m6a_chr11:101973359-101973919_-	0.381221	0.418176	0.075029	0.596914	0.216131	0.482047	0.376455	0.479586	0.345128	1	1	0.901123	0.0605239	0.012079	0
Dusp3	ENSMUSG00000003518	86869	GCAATTGGCTAGGTTCCTCCTCCTA	chr11:101973785-101973809_-	chr11:101973359-101973919_-	-	165065_m6a_chr11:101973359-101973919_-	0.28546	0.669014	0.470147	0.983973	0.529992	0.368539	0.336235	0.376066	0.649726	1	1	0.573481	0.0585812	0.0439074	0
Dusp3	ENSMUSG00000003518	24874	TGAGCTGCAATTGGCTAGGTTCCTC	chr11:101973779-101973803_-	chr11:101973359-101973919_-	-	165064_m6a_chr11:101973359-101973919_-	1.14211	0.947751	1.31907	1.09777	0.781356	0.894741	0.96457	0.557244	0.297985	1	1	0.0135456	0.00677769	0.0699037	1
Dusp3	ENSMUSG00000003518	836588	CGGACATGAGCTGCAATTGGCTAGG	chr11:101973773-101973797_-	chr11:101973359-101973919_-	-	165063_m6a_chr11:101973359-101973919_-	0.0318997	1.10619	0.83376	-0.240709	-0.491348	-0.3949	-0.812814	0.18839	0.381735	0.994055	1	0.335245	0.990191	0.697218	0
Dusp3	ENSMUSG00000003518	405218	CACCCACGGACATGAGCTGCAATTG	chr11:101973767-101973791_-	chr11:101973359-101973919_-	-	165062_m6a_chr11:101973359-101973919_-	0.997977	-0.183265	0.525174	0.272234	0.251264	0.352387	0.221158	-0.542617	-0.590833	1	1	0.552765	0.0188473	0.884673	0
Dusp3	ENSMUSG00000003518	870431	TGCACACACCCACGGACATGAGCTG	chr11:101973761-101973785_-	chr11:101973359-101973919_-	-	165061_m6a_chr11:101973359-101973919_-	-0.841682	0.801284	0.64438	-0.174397	-0.776673	-0.907428	-0.957639	0.0400102	-0.0299728	1	1	0.686073	0.960736	0.855477	0
Dusp3	ENSMUSG00000003518	547602	CACCCGTGCACACACCCACGGACAT	chr11:101973755-101973779_-	chr11:101973359-101973919_-	-	165060_m6a_chr11:101973359-101973919_-	0.155753	-0.174848	0.422272	-0.301451	-0.180448	-0.172045	-0.0813877	-0.208662	-0.387387	1	1	0.915107	0.993235	0.973451	0
Dusp3	ENSMUSG00000003518	632671	CATATGCACCCGTGCACACACCCAC	chr11:101973749-101973773_-	chr11:101973359-101973919_-	-	165059_m6a_chr11:101973359-101973919_-	0.3273	0.718634	0.523159	0.0901741	-0.230863	0.0511565	-0.253848	0.0434192	-0.169181	0.092979	1	0.423039	0.880348	0.953808	0
Dusp3	ENSMUSG00000003518	713652	TTCCAACATATGCACCCGTGCACAC	chr11:101973743-101973767_-	chr11:101973359-101973919_-	-	165058_m6a_chr11:101973359-101973919_-	0.901242	1.1704	1.27758	0.773386	0.547334	0.113975	0.385831	-0.211816	-0.0545011	0.00182207	1	0.0156271	0.110258	0.69011	0
Dusp3	ENSMUSG00000003518	936975	CACCCCTTCCAACATATGCACCCGT	chr11:101973737-101973761_-	chr11:101973359-101973919_-	-	165057_m6a_chr11:101973359-101973919_-	-0.256373	0.475616	0.903803	-0.543808	-0.591046	-0.630623	-0.706766	0.305296	0.0988351	1	1	0.625107	0.999404	0.744439	0
Dusp3	ENSMUSG00000003518	647704	GACAGGCACCCCTTCCAACATATGC	chr11:101973731-101973755_-	chr11:101973359-101973919_-	-	165056_m6a_chr11:101973359-101973919_-	0.492598	0.956311	0.573493	0.0259178	0.12006	-0.230339	0.344516	-0.256627	0.106824	1	1	0.171777	0.873032	0.652061	0
Dusp3	ENSMUSG00000003518	580259	CAAGGGGACAGGCACCCCTTCCAAC	chr11:101973725-101973749_-	chr11:101973359-101973919_-	-	165055_m6a_chr11:101973359-101973919_-	0.476963	0.507955	0.493153	0.0694955	0.155179	0.0010151	0.317832	0.0601663	0.220139	1	1	0.69786	0.852081	0.268247	0
Dusp3	ENSMUSG00000003518	701528	TGTCCCCAAGGGGACAGGCACCCCT	chr11:101973719-101973743_-	chr11:101973359-101973919_-	-	165054_m6a_chr11:101973359-101973919_-	0.430395	0.335032	0.369584	-0.387423	-0.511575	0.162655	-0.29237	-1.14037	-0.513125	1	1	0.974951	0.897211	0.955398	0
Dusp3	ENSMUSG00000003518	224251	TCCTTCTGTCCCCAAGGGGACAGGC	chr11:101973713-101973737_-	chr11:101973359-101973919_-	-	165053_m6a_chr11:101973359-101973919_-	-0.207114	-0.683232	0.245824	2.00637	0.584573		1.05444	1.05197		1	1	0.941416	0.175292	0.000431313	0
Dusp3	ENSMUSG00000003518	518718	TCATTTTCCTTCTGTCCCCAAGGGG	chr11:101973707-101973731_-	chr11:101973359-101973919_-	-	165052_m6a_chr11:101973359-101973919_-	0.104759	-0.595155	-0.221992	-0.820206	-0.283349	1.1169	0.907461	0.330793	-0.976445	1	1	0.966028	0.580571	0.535784	0
Dusp3	ENSMUSG00000003518	10450	GGCCTTTCATTTTCCTTCTGTCCCC	chr11:101973701-101973725_-	chr11:101973359-101973919_-	-	165051_m6a_chr11:101973359-101973919_-	0.823883	0.803083	0.396006	0.914507	0.666218	0.534266	0.6004	-0.162869	0.250735	1	1	0.166675	0.0182574	0.367695	0
Dusp3	ENSMUSG00000003518	748279	CAGAGGGGCCTTTCATTTTCCTTCT	chr11:101973695-101973719_-	chr11:101973359-101973919_-	-	165050_m6a_chr11:101973359-101973919_-	-0.456294	-0.214296	-0.26018	-0.337192	-0.445913	-0.531764	0.204586	0.14274	-0.182045	1	1	0.995839	0.995292	0.731807	0
Dusp3	ENSMUSG00000003518	354309	GGTGAGCAGAGGGGCCTTTCATTTT	chr11:101973689-101973713_-	chr11:101973359-101973919_-	-	165049_m6a_chr11:101973359-101973919_-	0.796867	0.56263	0.110937	-0.0240947	0.466203	0.489768	0.100697	0.367558	-0.325582	1	1	0.514044	0.205274	0.659773	0
Dusp3	ENSMUSG00000003518	505705	GGCCAGGGTGAGCAGAGGGGCCTTT	chr11:101973683-101973707_-	chr11:101973359-101973919_-	-	165048_m6a_chr11:101973359-101973919_-	1.05245	1.63859	1.0601	0.745499	0.521413	0.416387	0.597965	0.357262	-0.0623991	0.821202	1	0.0303009	0.0243769	0.254509	1
Dusp3	ENSMUSG00000003518	460382	GTAAATGGCCAGGGTGAGCAGAGGG	chr11:101973677-101973701_-	chr11:101973359-101973919_-	-	165047_m6a_chr11:101973359-101973919_-	1.14825	1.07302	0.54095	0.107287	0.759361	1.14717	0.425133		0.358413	1	1	0.0787926	0.110379	0.0425706	0
Dusp3	ENSMUSG00000003518	486155	CCTCCCGTAAATGGCCAGGGTGAGC	chr11:101973671-101973695_-	chr11:101973359-101973919_-	-	165046_m6a_chr11:101973359-101973919_-	0.904518	1.34525	0.889325	0.547545	0.347822	0.113455	0.446686	0.502589	0.195973	1	1	0.0334931	0.127193	0.0638186	0
Dusp3	ENSMUSG00000003518	371310	GCAGAGCCTCCCGTAAATGGCCAGG	chr11:101973665-101973689_-	chr11:101973359-101973919_-	-	165045_m6a_chr11:101973359-101973919_-	0.540014	0.792699	-0.186159	-0.0860948	0.104985	0.851237	0.170393	-0.541207	-1.17025	1	1	0.634583	0.32382	0.884186	0
Dusp3	ENSMUSG00000003518	877313	GAACCAGCAGAGCCTCCCGTAAATG	chr11:101973659-101973683_-	chr11:101973359-101973919_-	-	165044_m6a_chr11:101973359-101973919_-	-0.881185	-0.180764	-0.219094	-0.618795	-0.861701	-1.09951	-1.28973	-0.762789	-1.44598	1	1	0.972291	0.9906	0.988001	0
Dusp3	ENSMUSG00000003518	188304	ACCGTGGAACCAGCAGAGCCTCCCG	chr11:101973653-101973677_-	chr11:101973359-101973919_-	-	165043_m6a_chr11:101973359-101973919_-	0.791911	1.374	1.15595	1.18177	0.39215	0.248783	0.587575	0.512124	0.109339	1	1	0.0348349	0.123374	0.111458	0
Dusp3	ENSMUSG00000003518	840651	ACAGACACCGTGGAACCAGCAGAGC	chr11:101973647-101973671_-	chr11:101973359-101973919_-	-	165042_m6a_chr11:101973359-101973919_-	-0.292643	1.34188	1.00854	-0.999847	-0.837995	-0.861233	-1.00924	0.899988	0.34078	1	1	0.371343	0.998818	0.541438	0
Dusp3	ENSMUSG00000003518	502491	TCCTGCACAGACACCGTGGAACCAG	chr11:101973641-101973665_-	chr11:101973359-101973919_-	-	165041_m6a_chr11:101973359-101973919_-	1.15816	1.19232	0.903738	1.02414	0.453568	0.378454	0.560658	0.404638	0.039664	1	1	0.0116242	0.0711522	0.170618	0
Dusp3	ENSMUSG00000003518	470754	TCAGGATCCTGCACAGACACCGTGG	chr11:101973635-101973659_-	chr11:101973359-101973919_-	-	165040_m6a_chr11:101973359-101973919_-	0.882556	0.662199	0.595019	0.025397	0.35488	0.363136	0.598705	0.0825652	-1.00704	1	1	0.0657833	0.213413	0.676427	0
Dusp3	ENSMUSG00000003518	873963	TCAGTTTCAGGATCCTGCACAGACA	chr11:101973629-101973653_-	chr11:101973359-101973919_-	-	165039_m6a_chr11:101973359-101973919_-	1.47658	-0.281486	1.36448	-2.07381	-1.07809	0.792361	-0.87401	1.55638	-0.125877	0.00895103	1	0.297941	0.807008	0.479515	0
Dusp3	ENSMUSG00000003518	639119	AGCGAGTCAGTTTCAGGATCCTGCA	chr11:101973623-101973647_-	chr11:101973359-101973919_-	-	165038_m6a_chr11:101973359-101973919_-	1.2495	1.78284	1.08691	1.14181	0.633899	0.843075	0.517276	0.393604	0.0242014	5.87909e-08	0.0587196	0.0265755	0.0189596	0.18731	1
Dusp3	ENSMUSG00000003518	215853	CTGTCCAGCGAGTCAGTTTCAGGAT	chr11:101973617-101973641_-	chr11:101973359-101973919_-	-	165037_m6a_chr11:101973359-101973919_-	1.18112	1.07129	0.715655	0.914622	0.936363	0.737305	0.178715	-0.308809	0.899533	0.00360098	0.0585776	0.0364735	0.00373836	0.38933	2	**
Dusp3	ENSMUSG00000003518	540790	TCGTTTCTGTCCAGCGAGTCAGTTT	chr11:101973611-101973635_-	chr11:101973359-101973919_-	-	165036_m6a_chr11:101973359-101973919_-	0.947432	0.881249	1.36537	0.0210659	0.465662	0.867906	-0.132583	-0.0969981	0.116583	0.06382	1	0.032346	0.164047	0.927555	1
Dusp3	ENSMUSG00000003518	663327	CAAGTCTCGTTTCTGTCCAGCGAGT	chr11:101973605-101973629_-	chr11:101973359-101973919_-	-	165035_m6a_chr11:101973359-101973919_-	0.526247	0.956956	1.49997	-0.0869777	0.040344	-0.189306	-0.394586	0.38304	0.266441	0.154135	1	0.110104	0.958657	0.5847	0
Dusp3	ENSMUSG00000003518	720633	TGCCGCCAAGTCTCGTTTCTGTCCA	chr11:101973599-101973623_-	chr11:101973359-101973919_-	-	165034_m6a_chr11:101973359-101973919_-	0.816635	0.973776	0.974068	0.479144	0.252502	-0.085087	0.369612	0.537284	0.135355	0.906227	1	0.00749659	0.341024	0.111397	0
Dusp3	ENSMUSG00000003518	538349	TCATGGTGCCGCCAAGTCTCGTTTC	chr11:101973593-101973617_-	chr11:101973359-101973919_-	-	165033_m6a_chr11:101973359-101973919_-	0.860232	0.558109	0.985414	0.0907023	0.116615	0.365565	0.213611	-0.295143	-0.0774078	0.345841	1	0.0696942	0.302797	0.84328	0
Dusp3	ENSMUSG00000003518	697965	CCATTCTCATGGTGCCGCCAAGTCT	chr11:101973587-101973611_-	chr11:101973359-101973919_-	-	165032_m6a_chr11:101973359-101973919_-	0.513532	0.155052	-0.102333	-0.208535	-0.340568	0.0201463	-0.132992	-0.769764	-1.27523	1	1	0.887339	0.95174	0.940451	0
Dusp3	ENSMUSG00000003518	39180	CTCTCTCCATTCTCATGGTGCCGCC	chr11:101973581-101973605_-	chr11:101973359-101973919_-	-	165031_m6a_chr11:101973359-101973919_-	0.654249	0.400384	0.300953	0.691645	0.577888	0.828734	0.304451	-0.061393	-0.213	1	0.770146	0.64854	0.00813262	0.762248	0
Dusp3	ENSMUSG00000003518	94634	CTCTCTCTCTCTCCATTCTCATGGT	chr11:101973575-101973599_-	chr11:101973359-101973919_-	-	165030_m6a_chr11:101973359-101973919_-	0.207511	0.0209877	0.248489	0.355972	0.654057	0.523892	0.0845293	-0.0471595	0.245824	1	1	0.979965	0.0247154	0.690666	0
Dusp3	ENSMUSG00000003518	526453	TCTTTGCTCTCTCTCTCTCCATTCT	chr11:101973569-101973593_-	chr11:101973359-101973919_-	-	165029_m6a_chr11:101973359-101973919_-	0.0388633	0.0780403	0.353783	0.513996	0.367404	0.504229	0.165685	0.400623	0.318949	1	1	0.962519	0.0103296	0.0795939	0
Dusp3	ENSMUSG00000003518	112537	TTTCTTTCTTTGCTCTCTCTCTCTC	chr11:101973563-101973587_-	chr11:101973359-101973919_-	-	165028_m6a_chr11:101973359-101973919_-	0.325324	-0.218168	0.330784	0.340413	0.627175	0.537791	0.134527	0.146934	0.348717	1	1	0.903613	0.0250616	0.220354	0
Dusp3	ENSMUSG00000003518	439735	AGGCTGTTTCTTTCTTTGCTCTCTC	chr11:101973557-101973581_-	chr11:101973359-101973919_-	-	165027_m6a_chr11:101973359-101973919_-	0.836427	0.938802	1.14772	-0.016242	0.311365	0.375592	0.146632	0.491254	0.00576288	1	1	0.0175355	0.276391	0.336166	0
Dusp3	ENSMUSG00000003518	236842	TTTTAAAGGCTGTTTCTTTCTTTGC	chr11:101973551-101973575_-	chr11:101973359-101973919_-	-	165026_m6a_chr11:101973359-101973919_-	0.43905	-1.75563	0.496652	-2.83512	-0.0536796	1.6519	2.0945			1	1	0.796333	0.642553	1	0
Dusp3	ENSMUSG00000003518	455600	AAGTTCTTTTAAAGGCTGTTTCTTT	chr11:101973545-101973569_-	chr11:101973359-101973919_-	-	165025_m6a_chr11:101973359-101973919_-	0.345402			0.139739	0.701781	0.950344	0.362539	0.495331	-0.106824	1	1	1	0.0976764	0.309375	0
Dusp3	ENSMUSG00000003518	27270	CTTAGAAAGTTCTTTTAAAGGCTGT	chr11:101973539-101973563_-	chr11:101973359-101973919_-	-	165024_m6a_chr11:101973359-101973919_-	1.44285		-0.100389	1.17883	-0.300766	0.340466	0.762003			1	1	0.42976	0.29747	1	0
Dusp3	ENSMUSG00000003518	154789	ACCACCCTTAGAAAGTTCTTTTAAA	chr11:101973533-101973557_-	chr11:101973359-101973919_-	-	165023_m6a_chr11:101973359-101973919_-	1.5323			0.045474	0.680326	0.199372	1.68192			1	1	1	0.233186	1	0
Dusp3	ENSMUSG00000003518	413525	TCAAAAACCACCCTTAGAAAGTTCT	chr11:101973527-101973551_-	chr11:101973359-101973919_-	-	165022_m6a_chr11:101973359-101973919_-	-0.747562		-0.100389		0.0925974		-0.185422			1	1	0.892573	1	1	0
Dusp3	ENSMUSG00000003518	19172	CGAGGTTCAAAAACCACCCTTAGAA	chr11:101973521-101973545_-	chr11:101973359-101973919_-	-	165021_m6a_chr11:101973359-101973919_-	0.0333007		-0.100389	0.644927	-0.175447			0.899231	1.19693	1	1	0.96019	0.426111	0.0519306	0
Dusp3	ENSMUSG00000003518	485393	GTCCAGCGAGGTTCAAAAACCACCC	chr11:101973515-101973539_-	chr11:101973359-101973919_-	-	165020_m6a_chr11:101973359-101973919_-	1.2784	0.64111	1.41557	-0.178525	0.5184	0.515351	0.142713	-0.128837	-0.297275	1	1	0.0618861	0.29507	0.89795	0
Dusp3	ENSMUSG00000003518	874437	TACAAGGTCCAGCGAGGTTCAAAAA	chr11:101973509-101973533_-	chr11:101973359-101973919_-	-	165019_m6a_chr11:101973359-101973919_-		-0.683232	1.04006		-0.068593	-1.3218	-1.72429		-0.328453	1	1	0.613103	0.794709	0.82882	0
Dusp3	ENSMUSG00000003518	927447	CACACATACAAGGTCCAGCGAGGTT	chr11:101973503-101973527_-	chr11:101973359-101973919_-	-	165018_m6a_chr11:101973359-101973919_-	-0.745339	0.174631	0.679658	0.223184	-0.708313	-0.160058	-1.71454	-0.631042	-0.498763	1	1	0.808218	0.839128	0.947433	0
Dusp3	ENSMUSG00000003518	615521	AATGTGCACACATACAAGGTCCAGC	chr11:101973497-101973521_-	chr11:101973359-101973919_-	-	165017_m6a_chr11:101973359-101973919_-	0.314158	0.869077	0.0992666	-0.0655464	0.262246	1.04683	-0.184628	0.385233	-0.00298427	1	1	0.606411	0.244988	0.655808	0
Dusp3	ENSMUSG00000003518	191907	CTGGCAAATGTGCACACATACAAGG	chr11:101973491-101973515_-	chr11:101973359-101973919_-	-	165016_m6a_chr11:101973359-101973919_-	0.407308		-0.847934	2.07277	0.170651	-0.411971	0.23193	0.6641	-0.976445	1	1	0.771448	0.296516	0.619328	0
Dusp3	ENSMUSG00000003518	541212	CAATCTCTGGCAAATGTGCACACAT	chr11:101973485-101973509_-	chr11:101973359-101973919_-	-	165015_m6a_chr11:101973359-101973919_-	1.35412	-0.280394	-1.33241	1.19118	-0.0104608	-0.945756	-0.520281	1.32752	-0.430997	1	1	0.733694	0.533909	0.510816	0
Dusp3	ENSMUSG00000003518	267967	TATGTTCAATCTCTGGCAAATGTGC	chr11:101973479-101973503_-	chr11:101973359-101973919_-	-	165014_m6a_chr11:101973359-101973919_-	-0.640406	2.33237			0.327409	-0.23157	0.351509	1.05197	0.653526	1	1	0.426827	0.599015	0.0581075	0
Dusp3	ENSMUSG00000003518	612717	GAGGATTATGTTCAATCTCTGGCAA	chr11:101973473-101973497_-	chr11:101973359-101973919_-	-	165013_m6a_chr11:101973359-101973919_-	0.639575					-0.476061	-0.308819			1	1	1	1	1	0
Dusp3	ENSMUSG00000003518	117328	TCCCAAGAGGATTATGTTCAATCTC	chr11:101973467-101973491_-	chr11:101973359-101973919_-	-	165012_m6a_chr11:101973359-101973919_-	0.123633	-0.766371	0.503138		0.0164954	2.09255	1.97331	-0.803853	0.564564	1	1	0.857672	0.269724	0.321191	0
Dusp3	ENSMUSG00000003518	245335	GTGAAGTCCCAAGAGGATTATGTTC	chr11:101973461-101973485_-	chr11:101973359-101973919_-	-	165011_m6a_chr11:101973359-101973919_-	0.775126			-1.49164	0.280391	-0.587043	0.14822		0.765939	1	1	1	0.85686	0.247749	0
Dusp3	ENSMUSG00000003518	780379	GAGAACGTGAAGTCCCAAGAGGATT	chr11:101973455-101973479_-	chr11:101973359-101973919_-	-	165010_m6a_chr11:101973359-101973919_-				0.139739	0.358896		-0.559572	0.495331		1	1	1	0.247174	0.602484	0
Dusp3	ENSMUSG00000003518	46746	AATAATGAGAACGTGAAGTCCCAAG	chr11:101973449-101973473_-	chr11:101973359-101973919_-	-	165009_m6a_chr11:101973359-101973919_-	-1.25294	-0.0322373		0.310316	0.175831	0.00998799	-0.591518	0.495331		1	1	0.843616	0.390374	0.608062	0
Dusp3	ENSMUSG00000003518	205477	CATACAAATAATGAGAACGTGAAGT	chr11:101973443-101973467_-	chr11:101973359-101973919_-	-	165008_m6a_chr11:101973359-101973919_-	1.57042		-0.348169		1.86017					1	1	0.462683	1	1	0
Dusp3	ENSMUSG00000003518	928152	CGGAGACATACAAATAATGAGAACG	chr11:101973437-101973461_-	chr11:101973359-101973919_-	-	165007_m6a_chr11:101973359-101973919_-			7.61755	0.831455	-0.0145222	-0.0908731	-0.735057			1.83661e-30	1	1	0.379	1	0
Dusp3	ENSMUSG00000003518	280873	TGACCCCGGAGACATACAAATAATG	chr11:101973431-101973455_-	chr11:101973359-101973919_-	-	165006_m6a_chr11:101973359-101973919_-	-0.812903	0.698953		0.76235	-0.0284329		1.25965			1	1	0.701621	0.332788	1	0
Dusp3	ENSMUSG00000003518	407074	TCTGCGTGACCCCGGAGACATACAA	chr11:101973425-101973449_-	chr11:101973359-101973919_-	-	165005_m6a_chr11:101973359-101973919_-	0.417592	-0.0445038	0.0954783	-0.136419	0.0711752	0.271292	0.260596	-0.77511	-0.797123	1	1	0.935176	0.691683	0.88109	0
Dusp3	ENSMUSG00000003518	727962	GACGGCTCTGCGTGACCCCGGAGAC	chr11:101973419-101973443_-	chr11:101973359-101973919_-	-	165004_m6a_chr11:101973359-101973919_-	0.452845	0.375584	0.642148	0.355578	-0.0203719	0.427375	0.374762	-0.250953	0.103479	1	1	0.535416	0.244995	0.628372	0
Dusp3	ENSMUSG00000003518	291129	GTGGCTGACGGCTCTGCGTGACCCC	chr11:101973413-101973437_-	chr11:101973359-101973919_-	-	165003_m6a_chr11:101973359-101973919_-	0.995757	0.712138	0.669802	0.995665	0.189645	0.0375957	0.741591	0.455195	0.284531	1	1	0.0512744	0.229906	0.0598391	0
Dusp3	ENSMUSG00000003518	229117	GGGGTGGTGGCTGACGGCTCTGCGT	chr11:101973407-101973431_-	chr11:101973359-101973919_-	-	165002_m6a_chr11:101973359-101973919_-	1.13262	0.171586	0.374227	0.936082	0.174967	0.0911356	0.654819	0.654397	-0.087288	1	1	0.426662	0.215535	0.199132	0
Dusp3	ENSMUSG00000003518	400435	GGTGCTGGGGTGGTGGCTGACGGCT	chr11:101973401-101973425_-	chr11:101973359-101973919_-	-	165001_m6a_chr11:101973359-101973919_-	0.401576	0.0691196	0.11138	0.121767	0.333624	0.198503	0.128821	0.382929	0.483022	1	1	0.949721	0.162346	0.108423	0
Dusp3	ENSMUSG00000003518	379461	GTGCCGGGTGCTGGGGTGGTGGCTG	chr11:101973395-101973419_-	chr11:101973359-101973919_-	-	165000_m6a_chr11:101973359-101973919_-	0.646947	0.336785	0.335562	0.239637	0.474792	0.384296	0.18535	0.631779	0.478482	1	1	0.685092	0.0396526	0.0794347	0
Dusp3	ENSMUSG00000003518	369103	GCCTATGTGCCGGGTGCTGGGGTGG	chr11:101973389-101973413_-	chr11:101973359-101973919_-	-	164999_m6a_chr11:101973359-101973919_-	1.20671	1.45604	0.910774	0.70095	0.782894	0.453992	0.693362	0.469663	0.508537	1	1	0.0240085	0.0179086	0.0133772	0
Dusp3	ENSMUSG00000003518	847715	TGAGACGCCTATGTGCCGGGTGCTG	chr11:101973383-101973407_-	chr11:101973359-101973919_-	-	164998_m6a_chr11:101973359-101973919_-	-0.351459	0.971333	0.493153	-0.657945	-1.23822	-0.390811	-1.10729	0.0905398	-0.291455	1	1	0.613215	0.965353	0.878807	0
Dusp3	ENSMUSG00000003518	484488	CTTTTATGAGACGCCTATGTGCCGG	chr11:101973377-101973401_-	chr11:101973359-101973919_-	-	164997_m6a_chr11:101973359-101973919_-	0.900194	0.62716	3.08727	0.211067	-0.205074	-0.914021	0.28675			0.186907	1	0.156649	0.844048	1	0
Dusp3	ENSMUSG00000003518	362379	AATGGGCTTTTATGAGACGCCTATG	chr11:101973371-101973395_-	chr11:101973359-101973919_-	-	164996_m6a_chr11:101973359-101973919_-	0.714546	-0.902472	-1.92117		0.0164954	0.392603	0.636048	1.32752	0.653526	1	1	0.871006	0.391396	0.0426584	0
Dusp3	ENSMUSG00000003518	677319	TCATAAAATGGGCTTTTATGAGACG	chr11:101973365-101973389_-	chr11:101973359-101973919_-	-	164995_m6a_chr11:101973359-101973919_-				2.30027		-0.967432	0.889024			1	1	1	0.400393	1	0
Dusp3	ENSMUSG00000003518	107541	TGGTTCTCATAAAATGGGCTTTTAT	chr11:101973359-101973383_-	chr11:101973359-101973919_-	-	164994_m6a_chr11:101973359-101973919_-		0.937753	0.946512			0.340466	0.330904			1	1	0.00313972	1	1	0
Helz	ENSMUSG00000020721	360140	ATCCCGATGGGACAGCTCTCTGAGT	chr11:107672541-107672565_+	chr11:107672540-107673081_+	+	127499_m6a_chr11:107672540-107673081_+	0.591582	0.298182	0.295519	1.18196	1.04962	0.693951	-0.0192628	0.545144	0.383106	1	1	0.0369278	0.017526	0.14192	1
Helz	ENSMUSG00000020721	412453	ACCTTGATCCCGATGGGACAGCTCT	chr11:107672547-107672571_+	chr11:107672540-107673081_+	+	127498_m6a_chr11:107672540-107673081_+	0.562144	-0.417597	-0.109632	0.0173695	0.909083	0.714206	0.279145	-0.555864	-0.257697	1	1	0.551406	0.173878	0.783368	0
Helz	ENSMUSG00000020721	412899	AGTGTCACCTTGATCCCGATGGGAC	chr11:107672553-107672577_+	chr11:107672540-107673081_+	+	127497_m6a_chr11:107672540-107673081_+	0.334455	-0.176087	0.527547	0.421918	0.801693	0.709444	0.263021	-0.0943572	0.279149	1	1	0.246376	0.032438	0.269115	0
Helz	ENSMUSG00000020721	55473	TTCTCCAGTGTCACCTTGATCCCGA	chr11:107672559-107672583_+	chr11:107672540-107673081_+	+	127496_m6a_chr11:107672540-107673081_+	0.0140331	-0.766927	-0.160807	0.29936	0.575791	0.674907	-0.222087	-1.29076	-0.672878	1	1	0.865502	0.0584267	0.937025	0
Helz	ENSMUSG00000020721	280945	AGCTAGTTCTCCAGTGTCACCTTGA	chr11:107672565-107672589_+	chr11:107672540-107673081_+	+	127495_m6a_chr11:107672540-107673081_+	0.267672	-0.0534823	0.0175333	0.139875	0.351245	0.931251	0.100646	-0.804641	-1.43107	1	1	0.416532	0.195697	0.887526	0
Helz	ENSMUSG00000020721	803852	CATTTCAGCTAGTTCTCCAGTGTCA	chr11:107672571-107672595_+	chr11:107672540-107673081_+	+	127494_m6a_chr11:107672540-107673081_+	-0.807355	-0.198708	-0.383062	-0.106131	-0.147515	-0.350871	-0.204772	1.07879	0.336948	1	1	0.948472	0.984465	0.226305	0
Helz	ENSMUSG00000020721	526288	TGGTGGCATTTCAGCTAGTTCTCCA	chr11:107672577-107672601_+	chr11:107672540-107673081_+	+	127493_m6a_chr11:107672540-107673081_+	0.236382	-0.0567246	0.428031	0.926124	0.481362	0.599096	0.0787614	0.540169	0.124574	1	1	0.201111	0.0384955	0.164029	0
Helz	ENSMUSG00000020721	716903	CTGAGGTGGTGGCATTTCAGCTAGT	chr11:107672583-107672607_+	chr11:107672540-107673081_+	+	127492_m6a_chr11:107672540-107673081_+	-0.0609739	0.689427	-0.340965	0.571218	0.598264	0.47938	0.477214	0.219131	0.41309	1	1	0.452053	0.00576654	0.0286012	0
Helz	ENSMUSG00000020721	9829	TCTTGACTGAGGTGGTGGCATTTCA	chr11:107672589-107672613_+	chr11:107672540-107673081_+	+	127491_m6a_chr11:107672540-107673081_+	0.28859	-0.559445	-0.481401	0.336155	0.846315	0.560411	0.588417	0.392849	-0.0157075	1	1	0.811419	0.0664415	0.139205	0
Helz	ENSMUSG00000020721	857414	CAGAAGTCTTGACTGAGGTGGTGGC	chr11:107672595-107672619_+	chr11:107672540-107673081_+	+	127490_m6a_chr11:107672540-107673081_+	0.417017	-0.0977043	-0.108263	0.570124	0.396464	0.320961	0.194781	0.409029	0.413045	1	1	0.466568	0.051508	0.0302905	0
Helz	ENSMUSG00000020721	899329	GTACTGCAGAAGTCTTGACTGAGGT	chr11:107672601-107672625_+	chr11:107672540-107673081_+	+	127489_m6a_chr11:107672540-107673081_+	-0.695942		0.068539	0.139739	-0.496241	-1.66194	-1.17535		-0.586184	1	1	0.743795	0.883238	0.90336	0
Helz	ENSMUSG00000020721	580783	TTGTCTGTACTGCAGAAGTCTTGAC	chr11:107672607-107672631_+	chr11:107672540-107673081_+	+	127488_m6a_chr11:107672540-107673081_+	-0.0441564	-1.48664	-1.16839	0.128714	0.257334	-0.151507	0.851614		-1.02419	1	1	0.919442	0.816178	0.549093	0
Helz	ENSMUSG00000020721	364720	CTGAACTTGTCTGTACTGCAGAAGT	chr11:107672613-107672637_+	chr11:107672540-107673081_+	+	127487_m6a_chr11:107672540-107673081_+	0.786014	1.06142	-0.136992	1.19118	0.385822	0.625251	1.32745			1	1	0.145171	0.0814833	1	0
Helz	ENSMUSG00000020721	102270	TCTAGGCTGAACTTGTCTGTACTGC	chr11:107672619-107672643_+	chr11:107672540-107673081_+	+	127486_m6a_chr11:107672540-107673081_+	0.267252	0.0305332	-0.0954821	0.379135	1.10197	0.527371	-0.0705605	-0.11609	0.398623	1	1	0.455242	0.0884055	0.476095	0
Helz	ENSMUSG00000020721	20760	CGGACTTCTAGGCTGAACTTGTCTG	chr11:107672625-107672649_+	chr11:107672540-107673081_+	+	127485_m6a_chr11:107672540-107673081_+	0.276276	-0.2244	-0.464967	0.00730411	0.911772	0.298399	0.133145	-0.350441	0.0997485	1	1	0.763655	0.276561	0.704274	0
Helz	ENSMUSG00000020721	296945	CGCTGGCGGACTTCTAGGCTGAACT	chr11:107672631-107672655_+	chr11:107672540-107673081_+	+	127484_m6a_chr11:107672540-107673081_+	0.482591	0.319803	0.41818	0.204179	0.493152	0.667551	0.285133	-1.15054	0.256504	1	1	0.00875714	0.110472	0.682357	0
Helz	ENSMUSG00000020721	207166	CGGGACCGCTGGCGGACTTCTAGGC	chr11:107672637-107672661_+	chr11:107672540-107673081_+	+	127483_m6a_chr11:107672540-107673081_+	0.436513	0.106189	0.121136	0.381019	0.803299	0.628585	-0.175956	0.162471	-0.441569	1	1	0.130218	0.0436838	0.824797	0
Helz	ENSMUSG00000020721	876456	GGGAGACGGGACCGCTGGCGGACTT	chr11:107672643-107672667_+	chr11:107672540-107673081_+	+	127482_m6a_chr11:107672540-107673081_+	-1.31101	-0.482746	-0.878989	-0.0670688	-0.750326	-0.54493	-0.836179	-0.263221	-1.79268	1	1	0.970744	0.959969	0.925637	0
Helz	ENSMUSG00000020721	440395	GGAAGGGGGAGACGGGACCGCTGGC	chr11:107672649-107672673_+	chr11:107672540-107673081_+	+	127481_m6a_chr11:107672540-107673081_+	0.500803	0.774622	0.932965	1.17229	0.899507	0.605335	0.340877	0.330793	0.491824	1	1	0.0162865	0.0270552	0.012125	0
Helz	ENSMUSG00000020721	357301	TGTGGAGGAAGGGGGAGACGGGACC	chr11:107672655-107672679_+	chr11:107672540-107673081_+	+	127480_m6a_chr11:107672540-107673081_+	-0.0488775	-0.270405	0.451467	-0.0694765	0.0456646	-0.108179	0.201818	0.61949	1.17336	1	1	0.516316	0.985088	0.0821839	0
Helz	ENSMUSG00000020721	467431	GTGGTCTGTGGAGGAAGGGGGAGAC	chr11:107672661-107672685_+	chr11:107672540-107673081_+	+	127479_m6a_chr11:107672540-107673081_+	0.169171	0.667374	0.777578	0.358364	0.058828	-0.134611	0.433758	0.876044	0.930938	1	1	0.0612873	0.759778	0.024313	0
Helz	ENSMUSG00000020721	150100	GCTACTGTGGTCTGTGGAGGAAGGG	chr11:107672667-107672691_+	chr11:107672540-107673081_+	+	127478_m6a_chr11:107672540-107673081_+	0.313654	-0.931884	0.853661	0.2397	0.762503	0.511505	-0.387247		1.08878	1	1	0.483586	0.0987937	0.380357	0
Helz	ENSMUSG00000020721	342458	AAACTGGCTACTGTGGTCTGTGGAG	chr11:107672673-107672697_+	chr11:107672540-107673081_+	+	127477_m6a_chr11:107672540-107673081_+	0.702573	0.600589	0.500219	0.872857	1.0698	0.710211	0.475488	0.719018	0.654107	1	1	0.00560239	0.0117289	0.00834011	0
Helz	ENSMUSG00000020721	353239	GTTAGCAAACTGGCTACTGTGGTCT	chr11:107672679-107672703_+	chr11:107672540-107673081_+	+	127476_m6a_chr11:107672540-107673081_+	0.931677	0.741684	0.95753	1.23544	1.18038	1.10905	0.758286	-2.52601	-1.44324	1	1	0.00338345	0.000728516	0.818608	1
Helz	ENSMUSG00000020721	281246	ATTAAAGTTAGCAAACTGGCTACTG	chr11:107672685-107672709_+	chr11:107672540-107673081_+	+	127475_m6a_chr11:107672540-107673081_+	0.514712	0.0787766		0.139739	-0.306377		-1.32718	0.495331	-0.176654	1	1	0.232846	0.796912	0.732697	0
Helz	ENSMUSG00000020721	149274	GCTGTCATTAAAGTTAGCAAACTGG	chr11:107672691-107672715_+	chr11:107672540-107673081_+	+	127474_m6a_chr11:107672540-107673081_+	1.52887		0.807629	-0.0755509				1.34095	1.75425	1	1	0.0996256	1	0.0439223	0
Helz	ENSMUSG00000020721	838087	TCTGCTGCTGTCATTAAAGTTAGCA	chr11:107672697-107672721_+	chr11:107672540-107673081_+	+	127473_m6a_chr11:107672540-107673081_+	-0.740687	0.181068	0.926876	1.02329	0.314005	0.951527	-0.0223713	0.081954		1	1	0.450035	0.0683271	0.664894	0
Helz	ENSMUSG00000020721	799429	AATGTCTCTGCTGCTGTCATTAAAG	chr11:107672703-107672727_+	chr11:107672540-107673081_+	+	127472_m6a_chr11:107672540-107673081_+	-0.301058	-0.143148	0.297311	-0.0303328	-0.349277	0.146369	0.104024	-0.342108	-0.113637	1	1	0.688224	0.910643	0.848206	0
Helz	ENSMUSG00000020721	128192	TACTTCAATGTCTCTGCTGCTGTCA	chr11:107672709-107672733_+	chr11:107672540-107673081_+	+	127471_m6a_chr11:107672540-107673081_+	0.306081	-0.287419	-0.418931	0.473094	0.518744	0.523251	0.270949	0.0724998	-0.611671	1	1	0.755356	0.00154521	0.68325	0
Helz	ENSMUSG00000020721	760813	GTTGGCTACTTCAATGTCTCTGCTG	chr11:107672715-107672739_+	chr11:107672540-107673081_+	+	127470_m6a_chr11:107672540-107673081_+	-0.740738	0.348115	-0.0949329	-0.014008	-0.406861	-0.0175331	-0.63505	0.306698	0.277161	1	1	0.717868	0.945959	0.586282	0
Helz	ENSMUSG00000020721	89322	TGGGCTGTTGGCTACTTCAATGTCT	chr11:107672721-107672745_+	chr11:107672540-107673081_+	+	127469_m6a_chr11:107672540-107673081_+	0.471246	-0.422729	0.950457	-0.161095	0.740808	0.784158	0.17991	-0.21876	-0.161264	0.555077	0.168353	0.279845	0.261012	0.791449	0
Helz	ENSMUSG00000020721	875792	GAATGCTGGGCTGTTGGCTACTTCA	chr11:107672727-107672751_+	chr11:107672540-107673081_+	+	127468_m6a_chr11:107672540-107673081_+	-1.21572	0.232139	-0.430845	-0.204435	-0.827348	-0.642812	-0.804047	0.225819	-0.0233244	1	1	0.831958	0.973849	0.754945	0
Helz	ENSMUSG00000020721	243002	CTGCGGGAATGCTGGGCTGTTGGCT	chr11:107672733-107672757_+	chr11:107672540-107673081_+	+	127467_m6a_chr11:107672540-107673081_+	0.45529	0.614272	0.535159	0.964466	0.825465	0.613767	0.108514	0.490018	0.448172	1	0.409087	0.00449096	0.0145909	0.0694318	1
Helz	ENSMUSG00000020721	353391	GAGGCGCTGCGGGAATGCTGGGCTG	chr11:107672739-107672763_+	chr11:107672540-107673081_+	+	127466_m6a_chr11:107672540-107673081_+	0.641124	0.734624	0.792036	1.60304	1.14606	0.644017	0.787513	0.421963	-1.49291	0.0052341	4.56749e-07	0.00214882	0.040455	0.576099	2	**
Helz	ENSMUSG00000020721	763756	AGGCGGGAGGCGCTGCGGGAATGCT	chr11:107672745-107672769_+	chr11:107672540-107673081_+	+	127465_m6a_chr11:107672540-107673081_+	-1.31939	-0.518699	-0.241926	0.0138394	-0.319467	0.403613	-0.161557	0.0806582	-0.000309997	1	1	0.926585	0.76517	0.826037	1
Helz	ENSMUSG00000020721	610786	TAGCTGAGGCGGGAGGCGCTGCGGG	chr11:107672751-107672775_+	chr11:107672540-107673081_+	+	127464_m6a_chr11:107672540-107673081_+	-0.0786924	0.674458	0.351659	0.895544	0.535209	0.491982	0.860771	-0.665477	0.570503	1	1	0.176427	0.0402146	0.358178	0
Helz	ENSMUSG00000020721	935091	GCCAAATAGCTGAGGCGGGAGGCGC	chr11:107672757-107672781_+	chr11:107672540-107673081_+	+	127463_m6a_chr11:107672540-107673081_+	-1.30823	-0.202224	0.0488944	0.2397	-0.604553	-0.647939	-0.707185	-0.745352	1.03376	1	1	0.838096	0.902678	0.616661	0
Helz	ENSMUSG00000020721	195177	AGGGGAGCCAAATAGCTGAGGCGGG	chr11:107672763-107672787_+	chr11:107672540-107673081_+	+	127462_m6a_chr11:107672540-107673081_+	0.214076	0.611136	0.428453	1.08292	1.11379	0.120053	-0.27842	-0.121359	0.1926	0.281431	0.00079234	0.0433309	0.11557	0.774442	0
Helz	ENSMUSG00000020721	287771	CGAGAAAGGGGAGCCAAATAGCTGA	chr11:107672769-107672793_+	chr11:107672540-107673081_+	+	127461_m6a_chr11:107672540-107673081_+	-0.200396	0.189559	-0.2166	-0.233352	-0.659306	-1.66194	-0.724035	0.0611174		1	1	0.784224	0.936221	0.749352	0
Helz	ENSMUSG00000020721	87965	TGGCAACGAGAAAGGGGAGCCAAAT	chr11:107672775-107672799_+	chr11:107672540-107673081_+	+	127460_m6a_chr11:107672540-107673081_+	0.686469	-0.606023	0.306983	0.644927	0.0590511	-0.839309	-0.924887	0.416422	-0.281814	1	1	0.431319	0.69761	0.753946	0
Helz	ENSMUSG00000020721	405545	TTCAGATGGCAACGAGAAAGGGGAG	chr11:107672781-107672805_+	chr11:107672540-107673081_+	+	127459_m6a_chr11:107672540-107673081_+	0.260529	0.800735	-1.4022		-0.252851	-0.523945	-0.185422		0.122563	1	1	0.587978	0.929945	0.669817	0
Helz	ENSMUSG00000020721	901911	AAGGTGTTCAGATGGCAACGAGAAA	chr11:107672787-107672811_+	chr11:107672540-107673081_+	+	127458_m6a_chr11:107672540-107673081_+	0.153713				-0.0790454	0.479884	-0.0358517		-0.21104	1	1	1	0.519444	0.857876	0
Helz	ENSMUSG00000020721	729369	AGGGGCAAGGTGTTCAGATGGCAAC	chr11:107672793-107672817_+	chr11:107672540-107673081_+	+	127457_m6a_chr11:107672540-107673081_+	-0.250868	0.673121	-0.0245597	0.518838	0.390829	0.361988	0.366408	-0.0129388	-0.386646	1	1	0.401946	0.0252292	0.611878	0
Helz	ENSMUSG00000020721	606216	AGGAGGAGGGGCAAGGTGTTCAGAT	chr11:107672799-107672823_+	chr11:107672540-107673081_+	+	127456_m6a_chr11:107672540-107673081_+	-0.169002	0.737484	0.15618	0.119333	-0.37776	-0.108179	0.185953	1.25561	1.29747	1	1	0.276248	0.929108	0.0717631	0
Helz	ENSMUSG00000020721	889856	TTTCAGAGGAGGAGGGGCAAGGTGT	chr11:107672805-107672829_+	chr11:107672540-107673081_+	+	127455_m6a_chr11:107672540-107673081_+	-0.502895	0.718054	-0.128109	0.644068	-1.05252	-0.617447	-0.710451	0.473695	0.766624	1	1	0.524353	0.806925	0.409811	0
Helz	ENSMUSG00000020721	365390	CAGGTATTTCAGAGGAGGAGGGGCA	chr11:107672811-107672835_+	chr11:107672540-107673081_+	+	127454_m6a_chr11:107672540-107673081_+	0.0879007	0.480288	0.774724	0.558021	0.499962	-0.218685	-0.202121	0.833682	0.953809	1	1	0.0931901	0.413223	0.164765	0
Helz	ENSMUSG00000020721	576417	CGGAGCCAGGTATTTCAGAGGAGGA	chr11:107672817-107672841_+	chr11:107672540-107673081_+	+	127453_m6a_chr11:107672540-107673081_+	-0.0391799				-0.26091	0.346592	0.156611			1	1	1	0.666116	1	0
Helz	ENSMUSG00000020721	965	TCCTTCCGGAGCCAGGTATTTCAGA	chr11:107672823-107672847_+	chr11:107672540-107673081_+	+	127452_m6a_chr11:107672540-107673081_+	-0.182398	-0.819437		0.179194	0.493036	0.742066	0.0010745	0.605166	0.135172	1	1	0.834116	0.12964	0.206691	0
Helz	ENSMUSG00000020721	741086	CCATGCTCCTTCCGGAGCCAGGTAT	chr11:107672829-107672853_+	chr11:107672540-107673081_+	+	127451_m6a_chr11:107672540-107673081_+	-0.447795	-0.883247	0.36162	-0.410234	-0.806175	-0.455768	-0.45433			1	1	0.795074	0.98746	1	0
Helz	ENSMUSG00000020721	754113	AAAATTCCATGCTCCTTCCGGAGCC	chr11:107672835-107672859_+	chr11:107672540-107673081_+	+	127450_m6a_chr11:107672540-107673081_+	-0.420425	-0.00188327	0.418161	-0.0741328	-0.222628	0.0197722	-0.123376	0.358084	0.237773	1	1	0.579735	0.975925	0.284047	0
Helz	ENSMUSG00000020721	441661	GTTAGCAAAATTCCATGCTCCTTCC	chr11:107672841-107672865_+	chr11:107672540-107673081_+	+	127449_m6a_chr11:107672540-107673081_+	0.180613	0.498754	0.166086	0.0430613	0.259289	0.191937	-0.143825	0.19644	0.508537	1	1	0.0853063	0.752116	0.284112	0
Helz	ENSMUSG00000020721	426747	CTGCAAGTTAGCAAAATTCCATGCT	chr11:107672847-107672871_+	chr11:107672540-107673081_+	+	127448_m6a_chr11:107672540-107673081_+	-1.32525		0.422905	2.20725	-0.14224	0.340466	-0.111827	1.22636	1.24342	1	1	0.666788	0.250199	0.123514	0
Helz	ENSMUSG00000020721	926756	ATTCTGCTGCAAGTTAGCAAAATTC	chr11:107672853-107672877_+	chr11:107672540-107673081_+	+	127447_m6a_chr11:107672540-107673081_+	-0.94475	0.610342		0.491649	0.0164954	-0.0908731	-0.633458	0.495331		1	1	0.588195	0.647971	0.571303	0
Helz	ENSMUSG00000020721	54170	TAAGTGATTCTGCTGCAAGTTAGCA	chr11:107672859-107672883_+	chr11:107672540-107673081_+	+	127446_m6a_chr11:107672540-107673081_+	-0.754851	0.506007	-0.494542	-1.25738	0.504148	0.348788	-0.103445			1	1	0.742678	0.702309	1	0
Helz	ENSMUSG00000020721	875259	CCCTATTAAGTGATTCTGCTGCAAG	chr11:107672865-107672889_+	chr11:107672540-107673081_+	+	127445_m6a_chr11:107672540-107673081_+	-0.348573	0.343409	0.137683	-2.89426	0.149101	-1.12958	-0.402959	-0.271827		1	1	0.516788	0.885346	0.947889	0
Helz	ENSMUSG00000020721	531247	GCCCGGCCCTATTAAGTGATTCTGC	chr11:107672871-107672895_+	chr11:107672540-107673081_+	+	127444_m6a_chr11:107672540-107673081_+	0.325077	-0.169088	0.394939	0.109448	0.117812	0.203238	0.147152	0.0979195	0.0261917	1	1	0.270466	0.933903	0.235871	0
Helz	ENSMUSG00000020721	639571	GGGAAAGCCCGGCCCTATTAAGTGA	chr11:107672877-107672901_+	chr11:107672540-107673081_+	+	127443_m6a_chr11:107672540-107673081_+	-0.172566	-0.0416396	0.012522	0.151022	0.0441618	-0.0305656	-0.124552	-0.556725	0.224275	1	1	0.920878	0.954558	0.776348	0
Helz	ENSMUSG00000020721	736001	GCCATAGGGAAAGCCCGGCCCTATT	chr11:107672883-107672907_+	chr11:107672540-107673081_+	+	127442_m6a_chr11:107672540-107673081_+	-0.818043	-0.719984	-0.109979	-0.857319	-0.624804	-0.303342	-0.698542	-0.125725	-0.700259	1	1	0.943745	0.981546	0.951399	0
Helz	ENSMUSG00000020721	407232	AGGTAGGCCATAGGGAAAGCCCGGC	chr11:107672889-107672913_+	chr11:107672540-107673081_+	+	127441_m6a_chr11:107672540-107673081_+	0.313035	-0.344674	0.19281	0.0298587	0.322324	0.200459	0.23254	-0.0129388	-1.46342	1	1	0.500343	0.633744	0.767592	0
Helz	ENSMUSG00000020721	210862	CAATGGAGGTAGGCCATAGGGAAAG	chr11:107672895-107672919_+	chr11:107672540-107673081_+	+	127440_m6a_chr11:107672540-107673081_+	-0.640406	-1.30785	-0.2166	0.211067	0.58581	0.00998799	-0.633458	1.39594	1.1326	1	1	0.932667	0.394627	0.231966	0
Helz	ENSMUSG00000020721	689090	GGGAGGCAATGGAGGTAGGCCATAG	chr11:107672901-107672925_+	chr11:107672540-107673081_+	+	127439_m6a_chr11:107672540-107673081_+	-0.0610302	-0.935378	0.27626	-0.850824	-0.351696	0.719401	-0.30046		0.1926	1	1	0.749478	0.750174	0.637286	0
Helz	ENSMUSG00000020721	900863	TGGCCTGGGAGGCAATGGAGGTAGG	chr11:107672907-107672931_+	chr11:107672540-107673081_+	+	127438_m6a_chr11:107672540-107673081_+	-0.933937	1.04054	0.514546	-0.275472	-0.88203	-0.151507	-1.03101	0.130206	-1.02419	1	1	0.409797	0.949319	0.894557	0
Helz	ENSMUSG00000020721	310372	CTGTGGTGGCCTGGGAGGCAATGGA	chr11:107672913-107672937_+	chr11:107672540-107673081_+	+	127437_m6a_chr11:107672540-107673081_+	0.512052	0.028651	0.278135	0.994003	0.8236	0.682253	0.394793	0.692365	0.757855	1	1	0.128571	0.0103783	0.0190742	0
Helz	ENSMUSG00000020721	905607	AGGGTTCTGTGGTGGCCTGGGAGGC	chr11:107672919-107672943_+	chr11:107672540-107673081_+	+	127436_m6a_chr11:107672540-107673081_+	-0.780541	-0.171458	-0.263062	-0.946981	-0.877491	-0.10307	-0.767175	-0.653307	-0.00792131	1	1	0.93171	0.956854	0.924163	0
Helz	ENSMUSG00000020721	93287	TATAAAAGGGTTCTGTGGTGGCCTG	chr11:107672925-107672949_+	chr11:107672540-107673081_+	+	127435_m6a_chr11:107672540-107673081_+	0.566872	-0.865457	-0.220356	-0.289662	0.303802	0.0205026	0.116957	-1.00929	-0.408609	1	1	0.680618	0.823784	0.865587	0
Helz	ENSMUSG00000020721	76778	GATGTGTATAAAAGGGTTCTGTGGT	chr11:107672931-107672955_+	chr11:107672540-107673081_+	+	127434_m6a_chr11:107672540-107673081_+	0.639922	0.209375		0.139739	0.0658797	-0.411971	1.92594		2.61034	1	1	0.16746	0.880193	0.0489295	0
Helz	ENSMUSG00000020721	174261	GTTCTGGATGTGTATAAAAGGGTTC	chr11:107672937-107672961_+	chr11:107672540-107673081_+	+	127433_m6a_chr11:107672540-107673081_+	1.05979	-0.169145		0.76235	0.899248	0.259671	0.6072	2.58979		1	1	0.319465	0.0808143	0.182148	0
Helz	ENSMUSG00000020721	874172	TTGATGGTTCTGGATGTGTATAAAA	chr11:107672943-107672967_+	chr11:107672540-107673081_+	+	127432_m6a_chr11:107672540-107673081_+				1.39727			-0.111827		-0.281814	1	1	1	1	0.898092	0
Helz	ENSMUSG00000020721	74571	AGCGTGTTGATGGTTCTGGATGTGT	chr11:107672949-107672973_+	chr11:107672540-107673081_+	+	127431_m6a_chr11:107672540-107673081_+	0.870529	-0.621486	0.451138	0.576677	0.993257	0.558305	0.829801	0.762228	0.0313148	1	1	0.362662	0.0371	0.100136	0
Helz	ENSMUSG00000020721	398341	ACCAGCAGCGTGTTGATGGTTCTGG	chr11:107672955-107672979_+	chr11:107672540-107673081_+	+	127430_m6a_chr11:107672540-107673081_+	0.708759		1.24328	-1.17435	0.356589	-0.300972	0.23193	1.56221	0.515176	1	1	0.0897977	0.842756	0.110623	0
Helz	ENSMUSG00000020721	713956	CTCTTGACCAGCAGCGTGTTGATGG	chr11:107672961-107672985_+	chr11:107672540-107673081_+	+	127429_m6a_chr11:107672540-107673081_+	-0.217391	1.23425	-1.47888	-1.32285	-0.408905	-0.00825178	-0.431048	-1.43678	-1.07818	1	1	0.592178	0.911572	0.964304	0
Helz	ENSMUSG00000020721	385632	AAATGGCTCTTGACCAGCAGCGTGT	chr11:107672967-107672991_+	chr11:107672540-107673081_+	+	127428_m6a_chr11:107672540-107673081_+	0.0991954		-0.16914	0.961364	0.0387193	0.663983	0.143664	-0.586648	-1.02419	1	1	0.686257	0.170346	0.875699	0
Helz	ENSMUSG00000020721	464905	TGGGTGAAATGGCTCTTGACCAGCA	chr11:107672973-107672997_+	chr11:107672540-107673081_+	+	127427_m6a_chr11:107672540-107673081_+	0.226085	-0.606023	0.353353	-0.293257	0.55539	-0.569888	-0.0485184	1.60526	1.24342	1	1	0.572994	0.777901	0.111907	0
Helz	ENSMUSG00000020721	912849	TGACAGTGGGTGAAATGGCTCTTGA	chr11:107672979-107673003_+	chr11:107672540-107673081_+	+	127426_m6a_chr11:107672540-107673081_+	-0.493863	-0.0294492	0.371297	-0.401447	-0.722356	-0.637304	-0.814256	-0.601279	-0.892755	1	1	0.641851	0.993031	0.994573	0
Helz	ENSMUSG00000020721	10503	TCGAGATGACAGTGGGTGAAATGGC	chr11:107672985-107673009_+	chr11:107672540-107673081_+	+	127425_m6a_chr11:107672540-107673081_+	0.272509	0.431927	1.04006	0.619527	0.677435	0.635827	0.619194	1.13968	0.295074	1	1	0.0763552	0.000814062	0.063102	0
Helz	ENSMUSG00000020721	750906	CACTGTTCGAGATGACAGTGGGTGA	chr11:107672991-107673015_+	chr11:107672540-107673081_+	+	127424_m6a_chr11:107672540-107673081_+	-0.624456	-0.411712	0.559687	0.864149	3.58197	0.190414	0.116931	0.706252		1	0.966129	0.690765	0.164322	0.221818	0
Helz	ENSMUSG00000020721	601226	AGCAGACACTGTTCGAGATGACAGT	chr11:107672997-107673021_+	chr11:107672540-107673081_+	+	127423_m6a_chr11:107672540-107673081_+		0.61604	-0.348169		0.494722	-1.2137	0.330904			1	1	0.447647	0.689101	1	0
Helz	ENSMUSG00000020721	488951	CGAAGAAGCAGACACTGTTCGAGAT	chr11:107673003-107673027_+	chr11:107672540-107673081_+	+	127422_m6a_chr11:107672540-107673081_+	-0.0526737		-0.348169	1.87755	-0.11523	1.00322		-0.131251		1	0.995132	0.832486	0.173198	1	0
Helz	ENSMUSG00000020721	364802	GGGGAGCGAAGAAGCAGACACTGTT	chr11:107673009-107673033_+	chr11:107672540-107673081_+	+	127421_m6a_chr11:107672540-107673081_+	0.471465	-2.20604	0.631919	0.548578	0.55539	0.258647	0.384243	-0.333413	-0.959213	1	1	0.654025	0.0682993	0.775447	0
Helz	ENSMUSG00000020721	251032	TAGGCTGGGGAGCGAAGAAGCAGAC	chr11:107673015-107673039_+	chr11:107672540-107673081_+	+	127420_m6a_chr11:107672540-107673081_+	0.426275	0.611136	0.157316	0.67806	0.597994	0.980571	0.701566	-2.24118		1	1	0.060258	0.0221684	0.663375	0
Helz	ENSMUSG00000020721	902639	CTCTTCTAGGCTGGGGAGCGAAGAA	chr11:107673021-107673045_+	chr11:107672540-107673081_+	+	127419_m6a_chr11:107672540-107673081_+	-1.70035	0.0147049	-0.330162	-0.743518	-1.15434	0.128714	-1.12951	0.146804	-0.35134	1	1	0.849956	0.91678	0.846264	0
Helz	ENSMUSG00000020721	769677	GGTTACCTCTTCTAGGCTGGGGAGC	chr11:107673027-107673051_+	chr11:107672540-107673081_+	+	127418_m6a_chr11:107672540-107673081_+	-1.10447	0.0611554	0.226228	0.00746431	-0.242937	0.575237	-0.955246	0.178337	1.04909	1	1	0.741273	0.645685	0.481	0
Helz	ENSMUSG00000020721	131433	CTGAAAGGTTACCTCTTCTAGGCTG	chr11:107673033-107673057_+	chr11:107672540-107673081_+	+	127417_m6a_chr11:107672540-107673081_+	0.873659	-1.20775	0.677836		0.525368	-0.244433	0.476513			1	1	0.467747	0.562885	1	0
Helz	ENSMUSG00000020721	558104	AGAGCACTGAAAGGTTACCTCTTCT	chr11:107673039-107673063_+	chr11:107672540-107673081_+	+	127416_m6a_chr11:107672540-107673081_+	0.432943	0.62716	0.306983		0.254368		-0.215845	0.0611174	-0.897394	1	1	0.0248742	1	0.856785	0
Helz	ENSMUSG00000020721	563458	GACAGAAGAGCACTGAAAGGTTACC	chr11:107673045-107673069_+	chr11:107672540-107673081_+	+	127415_m6a_chr11:107672540-107673081_+	-0.203048	2.10249	1.12229	-0.728936	-0.593085		-0.103445	0.899231	-0.106824	1	1	0.144851	0.975438	0.330917	0
Helz	ENSMUSG00000020721	598746	TCCCCAGACAGAAGAGCACTGAAAG	chr11:107673051-107673075_+	chr11:107672540-107673081_+	+	127414_m6a_chr11:107672540-107673081_+	0.65589		0.306983	1.12395	1.03122	0.625251	-0.633458		0.2758	1	1	0.123325	0.0217936	0.653705	0
Helz	ENSMUSG00000020721	706301	AGCTAATCCCCAGACAGAAGAGCAC	chr11:107673057-107673081_+	chr11:107672540-107673081_+	+	127413_m6a_chr11:107672540-107673081_+	-0.94475		0.445358	-0.205049	0.690712	0.223027	0.35503	1.2878		1	1	0.631094	0.47445	0.174847	0
Gprc5c	ENSMUSG00000051043	644190	CTGGGCCAAGGCTCCTGGGAAGAAG	chr11:114863543-114863567_+	chr11:114863541-114863705_+	+	128451_m6a_chr11:114863541-114863705_+	1.33964	0.887464	1.30198	0.587819	0.797029	0.703055	0.734928	-0.0710864	0.29437	1.14059e-163	1.82271e-25	0.0467362	0.0164437	0.194748	1
Gprc5c	ENSMUSG00000051043	697695	ATGATTCTGGGCCAAGGCTCCTGGG	chr11:114863549-114863573_+	chr11:114863541-114863705_+	+	128450_m6a_chr11:114863541-114863705_+	0.753805	1.14979	0.949207	0.950654	0.675383	0.522093	0.601038	0.351354	0.220139	0.54812	1	0.100713	0.0551873	0.0501986	0
Gprc5c	ENSMUSG00000051043	314965	TGGGGCATGATTCTGGGCCAAGGCT	chr11:114863555-114863579_+	chr11:114863541-114863705_+	+	128449_m6a_chr11:114863541-114863705_+	2.38531	2.5691	1.11877	1.20286	1.16504	1.44816	0.50257	0.547478	0.103695	7.12574e-06	0.151109	0.0528945	0.00477759	0.0759823	0
Gprc5c	ENSMUSG00000051043	299260	ACCAGGTGGGGCATGATTCTGGGCC	chr11:114863561-114863585_+	chr11:114863541-114863705_+	+	128448_m6a_chr11:114863541-114863705_+	1.06604	1.59497	1.44128	0.643335	0.510596	0.843075	0.237835	0.252484	0.647556	0.0621545	1	0.0283777	0.0463068	0.0721261	1
Gprc5c	ENSMUSG00000051043	474684	GCTGCAACCAGGTGGGGCATGATTC	chr11:114863567-114863591_+	chr11:114863541-114863705_+	+	128447_m6a_chr11:114863541-114863705_+	1.93773	1.34098	2.05912	0.875194	0.97401	1.06601	0.346516	0.643219	0.0750275	0.00107199	0.881033	0.0212145	0.00414872	0.10984	2	*
Gprc5c	ENSMUSG00000051043	213253	ATCTGGGCTGCAACCAGGTGGGGCA	chr11:114863573-114863597_+	chr11:114863541-114863705_+	+	128446_m6a_chr11:114863541-114863705_+	1.71898	1.74405	0.907918	2.00116	1.15973	1.79201	0.318312	-0.386216	-0.737177	0.00433127	0.000962346	0.0598663	0.0184411	0.802657	1
Gprc5c	ENSMUSG00000051043	94050	ATCCAGATCTGGGCTGCAACCAGGT	chr11:114863579-114863603_+	chr11:114863541-114863705_+	+	128445_m6a_chr11:114863541-114863705_+	1.4557	-0.12647	1.36448	1.16407	0.937241	1.10478	0.0814322	-0.898237	0.167617	0.538815	0.328307	0.391353	0.0046676	0.7518	0
Gprc5c	ENSMUSG00000051043	867417	GAGGGGATCCAGATCTGGGCTGCAA	chr11:114863585-114863609_+	chr11:114863541-114863705_+	+	128444_m6a_chr11:114863541-114863705_+	0.459415	1.45751	1.00069	0.949595	-0.0996724	0.458577	-1.14005	0.0800354	0.402203	0.780512	1	0.249554	0.424461	0.696953	0
Gprc5c	ENSMUSG00000051043	470381	GTAGTAGAGGGGATCCAGATCTGGG	chr11:114863591-114863615_+	chr11:114863541-114863705_+	+	128443_m6a_chr11:114863541-114863705_+	0.971705	1.49734	1.6565	0.805845	1.23677	-0.160264	1.08206	0.155775	0.460404	0.883811	1	0.0454274	0.298773	0.103812	0
Gprc5c	ENSMUSG00000051043	72998	GAGGTTGTAGTAGAGGGGATCCAGA	chr11:114863597-114863621_+	chr11:114863541-114863705_+	+	128442_m6a_chr11:114863541-114863705_+	2.1264	0.654868	1.54366	0.864149	0.486729	0.725061	0.618288	0.794252	-1.26758	0.0536771	1	0.120534	0.0501219	0.509146	0
Gprc5c	ENSMUSG00000051043	181395	GTCACAGAGGTTGTAGTAGAGGGGA	chr11:114863603-114863627_+	chr11:114863541-114863705_+	+	128441_m6a_chr11:114863541-114863705_+	1.59092	0.707181	1.04945	-0.953629	0.495818	0.733951	0.251387	-1.65246	-0.365549	0.272352	1	0.139114	0.674981	0.818175	0
Gprc5c	ENSMUSG00000051043	496330	CGAGCGGTCACAGAGGTTGTAGTAG	chr11:114863609-114863633_+	chr11:114863541-114863705_+	+	128440_m6a_chr11:114863541-114863705_+	0.388061	1.89171	-1.02901	-0.728936	0.394067	-0.0908731	0.627587		0.997747	1	1	0.629402	0.872163	0.077282	0
Gprc5c	ENSMUSG00000051043	56782	GGCCCCCGAGCGGTCACAGAGGTTG	chr11:114863615-114863639_+	chr11:114863541-114863705_+	+	128439_m6a_chr11:114863541-114863705_+	1.02433	0.471813	0.835845	0.856258	0.384585	0.710304	0.301998	-0.174577	-0.0720548	0.997947	1	0.412238	0.0913175	0.611691	0
Gprc5c	ENSMUSG00000051043	510368	GCCCCAGGCCCCCGAGCGGTCACAG	chr11:114863621-114863645_+	chr11:114863541-114863705_+	+	128438_m6a_chr11:114863541-114863705_+	-0.185523	-0.347727	-0.0166359	-0.732358	-0.421276	-0.398482	0.0579184	0.162709	-0.0228974	1	1	0.994686	0.992805	0.496605	0
Gprc5c	ENSMUSG00000051043	158997	GACAATGCCCCAGGCCCCCGAGCGG	chr11:114863627-114863651_+	chr11:114863541-114863705_+	+	128437_m6a_chr11:114863541-114863705_+	-0.193302	-0.444195	-0.336786	-0.604083	-0.0113446	-0.367269	-0.139283	-0.380457	0.0570246	1	1	0.997671	0.972091	0.887657	0
Gprc5c	ENSMUSG00000051043	150339	CTCCAAGACAATGCCCCAGGCCCCC	chr11:114863633-114863657_+	chr11:114863541-114863705_+	+	128436_m6a_chr11:114863541-114863705_+	0.0781431	0.07765	-0.124234	0.2062	0.295338	0.150349	-0.226003	-0.456506	0.0597538	1	1	0.995748	0.965931	0.895484	0
Gprc5c	ENSMUSG00000051043	581252	CACTGCCTCCAAGACAATGCCCCAG	chr11:114863639-114863663_+	chr11:114863541-114863705_+	+	128435_m6a_chr11:114863541-114863705_+	0.344519	0.778846	0.994067	0.437135	-0.134998	0.652592	-0.13999	0.476993	-0.0699553	0.0721327	1	0.556332	0.577889	0.457336	0
Gprc5c	ENSMUSG00000051043	372252	TCCAGCCACTGCCTCCAAGACAATG	chr11:114863645-114863669_+	chr11:114863541-114863705_+	+	128434_m6a_chr11:114863541-114863705_+	0.193631	0.199311	0.41136	0.130262	0.167323	0.0386052	-0.13467	0.21486	0.0660798	1	1	0.988694	0.989404	0.557695	0
Gprc5c	ENSMUSG00000051043	872249	GCCTGCTCCAGCCACTGCCTCCAAG	chr11:114863651-114863675_+	chr11:114863541-114863705_+	+	128433_m6a_chr11:114863541-114863705_+	-1.35138	0.0652515	-0.106782	-0.55789	-1.26192	-1.06503	-1.20475	-0.153459	-0.0654858	1	1	0.94258	0.988053	0.860959	0
Gprc5c	ENSMUSG00000051043	152713	GATGATGCCTGCTCCAGCCACTGCC	chr11:114863657-114863681_+	chr11:114863541-114863705_+	+	128432_m6a_chr11:114863541-114863705_+	0.526589	0.598348	0.0386684	0.783239	0.253283	0.0685836	0.37485	-0.0948159	0.0769312	1	1	0.907048	0.503773	0.366878	0
Gprc5c	ENSMUSG00000051043	478272	TGTCGTGATGATGCCTGCTCCAGCC	chr11:114863663-114863687_+	chr11:114863541-114863705_+	+	128431_m6a_chr11:114863541-114863705_+	0.766918	0.342139	0.618784	-0.085575	0.184722	0.763674	0.192178	0.1215	-0.00758816	0.756705	1	0.836863	0.614121	0.297499	0
Gprc5c	ENSMUSG00000051043	466072	CACAAATGTCGTGATGATGCCTGCT	chr11:114863669-114863693_+	chr11:114863541-114863705_+	+	128430_m6a_chr11:114863541-114863705_+	0.712892	1.33086	0.536172	0.0860852	0.700783	-0.151507	0.0988084	-0.530018	0.123878	0.0601799	1	0.329562	0.702281	0.742572	0
Gprc5c	ENSMUSG00000051043	257523	GGTTAACACAAATGTCGTGATGATG	chr11:114863675-114863699_+	chr11:114863541-114863705_+	+	128429_m6a_chr11:114863541-114863705_+	1.26208	-0.280394	-0.2166		-0.452744	-1.01063	0.887857		-0.106824	1	1	0.779907	0.921109	0.315703	0
Gprc5c	ENSMUSG00000051043	712849	GATGATGGTTAACACAAATGTCGTG	chr11:114863681-114863705_+	chr11:114863541-114863705_+	+	128428_m6a_chr11:114863541-114863705_+	-1.6085		0.365025		-0.27956		-0.111827	0.253049		1	1	0.800002	1	0.4909	0
Ccdc85a	ENSMUSG00000032878	781460	TGGCATCTCATCTAGACCCTCCATA	chr11:28577389-28577413_-	chr11:28576243-28577418_-	-	141450_m6a_chr11:28576243-28577418_-	-0.411852	-1.26615	-0.367916	-1.27069	-0.443588	-0.286289	-0.507792	-0.418564		1	1	0.969748	0.970737	0.968679	0
Ccdc85a	ENSMUSG00000032878	203218	AAGAGGTGGCATCTCATCTAGACCC	chr11:28577383-28577407_-	chr11:28576243-28577418_-	-	141449_m6a_chr11:28576243-28577418_-	0.356151				0.53913	-0.160058	-1.10979	1.41665	1.1326	1	1	1	0.749978	0.300723	0
Ccdc85a	ENSMUSG00000032878	769768	AGATAGAAGAGGTGGCATCTCATCT	chr11:28577377-28577401_-	chr11:28576243-28577418_-	-	141448_m6a_chr11:28576243-28577418_-	1.50711	1.15244	1.7643	0.342811	-0.951524	0.727791	0.362539	0.288966		0.53745	1	0.0143961	0.785417	0.0346111	0
Ccdc85a	ENSMUSG00000032878	749162	GGGGGCAGATAGAAGAGGTGGCATC	chr11:28577371-28577395_-	chr11:28576243-28577418_-	-	141447_m6a_chr11:28576243-28577418_-	-0.040377	1.5978	1.54271	0.911077	-0.0375738	-0.217297	0.107673	1.11236	1.58261	1	1	0.196101	0.771646	0.0809072	0
Ccdc85a	ENSMUSG00000032878	383242	TTCAAGGGGGGCAGATAGAAGAGGT	chr11:28577365-28577389_-	chr11:28576243-28577418_-	-	141446_m6a_chr11:28576243-28577418_-	-0.585612	0.792699	0.468367	0.706169	-0.822533	-0.315353	-0.0274336	1.19984	1.34446	1	1	0.679856	0.865981	0.0949874	0
Ccdc85a	ENSMUSG00000032878	934374	TGGAAGTTCAAGGGGGGCAGATAGA	chr11:28577359-28577383_-	chr11:28576243-28577418_-	-	141445_m6a_chr11:28576243-28577418_-	-1.11258	0.333718	0.0293315	0.668264	-1.06891	-0.642865	-0.64204	0.927931	1.42243	1	1	0.874041	0.884079	0.224646	0
Ccdc85a	ENSMUSG00000032878	533656	GAGAGATGGAAGTTCAAGGGGGGCA	chr11:28577353-28577377_-	chr11:28576243-28577418_-	-	141444_m6a_chr11:28576243-28577418_-	-0.57722	0.703029	0.958127	0.48428	-0.437147	-0.480514	0.00230532	0.819776	1.08746	1	1	0.566882	0.919043	0.0928072	0
Ccdc85a	ENSMUSG00000032878	58206	TGAAAAGAGAGATGGAAGTTCAAGG	chr11:28577347-28577371_-	chr11:28576243-28577418_-	-	141443_m6a_chr11:28576243-28577418_-	-0.965081					0.67407	0.533509	0.706252		1	1	1	1	0.0432939	0
Ccdc85a	ENSMUSG00000032878	779424	ATATCCTGAAAAGAGAGATGGAAGT	chr11:28577341-28577365_-	chr11:28576243-28577418_-	-	141442_m6a_chr11:28576243-28577418_-	0.658292		-0.2166		0.43737	0.489067	-0.559572	0.0478184		1	1	0.654729	0.89547	0.715854	0
Ccdc85a	ENSMUSG00000032878	198987	TGGTTAATATCCTGAAAAGAGAGAT	chr11:28577335-28577359_-	chr11:28576243-28577418_-	-	141441_m6a_chr11:28576243-28577418_-		-1.25255	-1.20106		-0.452744	0.0985203		1.03183		1	1	0.995119	0.883058	1	0
Ccdc85a	ENSMUSG00000032878	19891	AGTTTCTGGTTAATATCCTGAAAAG	chr11:28577329-28577353_-	chr11:28576243-28577418_-	-	141440_m6a_chr11:28576243-28577418_-	-1.00494				1.24951					1	1	1	1	1	0
Ccdc85a	ENSMUSG00000032878	466637	TCCTGGAGTTTCTGGTTAATATCCT	chr11:28577323-28577347_-	chr11:28576243-28577418_-	-	141439_m6a_chr11:28576243-28577418_-	0.537422	1.06142	-0.348169	0.925557	0.751719	1.65324	-0.188897		-0.627684	1	1	0.530109	0.0872664	0.839319	0
Ccdc85a	ENSMUSG00000032878	381519	TTGTCTTCCTGGAGTTTCTGGTTAA	chr11:28577317-28577341_-	chr11:28576243-28577418_-	-	141438_m6a_chr11:28576243-28577418_-	1.88862	2.32823	2.57261	2.21045	1.88256	1.9982	0.477009	0.147	0.91773	0.0672043	0.261645	0.00599441	0.0020597	0.0714853	1
Ccdc85a	ENSMUSG00000032878	555677	TCCTGGTTGTCTTCCTGGAGTTTCT	chr11:28577311-28577335_-	chr11:28576243-28577418_-	-	141437_m6a_chr11:28576243-28577418_-	1.42409	1.20701	1.8431	2.46621	1.64839	1.44154	0.741898	0.412174	0.406259	0.920879	0.429868	0.0153878	0.0261758	0.0204566	0
Ccdc85a	ENSMUSG00000032878	597534	CTCAGTTCCTGGTTGTCTTCCTGGA	chr11:28577305-28577329_-	chr11:28576243-28577418_-	-	141436_m6a_chr11:28576243-28577418_-	0.57453	1.14056	1.53866	0.462638	0.509512	1.2178	0.059274	0.259967	0.27704	0.908246	1	0.0760654	0.258172	0.0476393	0
Ccdc85a	ENSMUSG00000032878	609232	AGGTCCCTCAGTTCCTGGTTGTCTT	chr11:28577299-28577323_-	chr11:28576243-28577418_-	-	141435_m6a_chr11:28576243-28577418_-	0.559472	0.437362	0.305074	0.491577	0.217471	1.2598	0.121361	-0.23927	-0.392485	1	1	0.585431	0.371625	0.796825	0
Ccdc85a	ENSMUSG00000032878	868611	CAGCATAGGTCCCTCAGTTCCTGGT	chr11:28577293-28577317_-	chr11:28576243-28577418_-	-	141434_m6a_chr11:28576243-28577418_-	-0.280261	0.590872	0.340566	0.128017	-0.514451	0.0939482	-1.03542	-0.441042	-0.327086	1	1	0.769979	0.953611	0.942442	0
Ccdc85a	ENSMUSG00000032878	707707	AGGAAACAGCATAGGTCCCTCAGTT	chr11:28577287-28577311_-	chr11:28576243-28577418_-	-	141433_m6a_chr11:28576243-28577418_-	0.0269759	0.448138	0.19281	0.772647	0.443987	1.23345	-0.828927	0.972059	-0.478799	1	1	0.898978	0.174556	0.56402	0
Ccdc85a	ENSMUSG00000032878	899266	TCATCCAGGAAACAGCATAGGTCCC	chr11:28577281-28577305_-	chr11:28576243-28577418_-	-	141432_m6a_chr11:28576243-28577418_-	-0.544654	0.715762	0.313715	0.0298587	-0.0964821	-0.926928	-1.72902	-0.502586	-0.222152	1	1	0.741759	0.949408	0.888315	0
Ccdc85a	ENSMUSG00000032878	255765	CGGTCATCATCCAGGAAACAGCATA	chr11:28577275-28577299_-	chr11:28576243-28577418_-	-	141431_m6a_chr11:28576243-28577418_-	0.170209	1.48566		1.16917	0.58224	-1.49012	0.682702	1.0049	0.461693	1	1	0.334712	0.684184	0.0219534	0
Ccdc85a	ENSMUSG00000032878	563565	TTCTGCCGGTCATCATCCAGGAAAC	chr11:28577269-28577293_-	chr11:28576243-28577418_-	-	141430_m6a_chr11:28576243-28577418_-	0.566126	1.10398	1.07726	0.532243	0.904171	1.22753	-0.274552	-0.407272	-0.335378	0.763911	0.911249	0.0588736	0.112269	0.993293	0
Ccdc85a	ENSMUSG00000032878	220533	TTGCCTTTCTGCCGGTCATCATCCA	chr11:28577263-28577287_-	chr11:28576243-28577418_-	-	141429_m6a_chr11:28576243-28577418_-	0.841897	0.580703	0.168728	1.02749	0.85165	1.12822	0.00482496	-1.01561	-1.07546	1	0.703085	0.363788	0.0145479	0.904886	0
Ccdc85a	ENSMUSG00000032878	55193	ACCCTTTTGCCTTTCTGCCGGTCAT	chr11:28577257-28577281_-	chr11:28576243-28577418_-	-	141428_m6a_chr11:28576243-28577418_-	0.715305	0.435118	0.171993	1.23997	0.874065	1.7937	0.596051	-0.536607	-0.238875	1	0.26129	0.525163	0.0519193	0.550407	0
Ccdc85a	ENSMUSG00000032878	186171	CGGGACACCCTTTTGCCTTTCTGCC	chr11:28577251-28577275_-	chr11:28576243-28577418_-	-	141427_m6a_chr11:28576243-28577418_-	0.918931	1.30275	0.735817	1.76959	1.25297	1.36066	0.00355563	0.109742	0.168035	0.480033	0.0504543	0.0427671	0.0139581	0.0804787	1
Ccdc85a	ENSMUSG00000032878	404300	CACTCCCGGGACACCCTTTTGCCTT	chr11:28577245-28577269_-	chr11:28576243-28577418_-	-	141426_m6a_chr11:28576243-28577418_-	1.3997	1.01797	1.17777	1.41527	1.34482	1.4363	-0.0811863	-0.150339	0.285054	0.0114434	0.0024742	0.0106425	0.000516858	0.424777	2	**
Ccdc85a	ENSMUSG00000032878	475835	CTTTGCCACTCCCGGGACACCCTTT	chr11:28577239-28577263_-	chr11:28576243-28577418_-	-	141425_m6a_chr11:28576243-28577418_-	1.37601	1.4988	1.51647	2.29868	1.57391	1.37709	0.749976	0.478539	-0.241751	0.00985622	0.000610542	0.000950267	0.0248034	0.184621	3	**
Ccdc85a	ENSMUSG00000032878	51467	CCCAATCTTTGCCACTCCCGGGACA	chr11:28577233-28577257_-	chr11:28576243-28577418_-	-	141424_m6a_chr11:28576243-28577418_-	1.22113	1.07292	1.29734	1.21966	0.904472	1.42611	0.296477	-0.585794	0.176683	3.85029e-12	2.68061e-11	0.00386383	0.0255961	0.533597	4	**
Ccdc85a	ENSMUSG00000032878	827361	TAGCGACCCAATCTTTGCCACTCCC	chr11:28577227-28577251_-	chr11:28576243-28577418_-	-	141423_m6a_chr11:28576243-28577418_-	0.73491	1.13118	1.08578	1.18626	0.193367	0.911467	0.189211	0.330025	0.145548	0.351826	1	0.0255918	0.263588	0.0263394	3
Ccdc85a	ENSMUSG00000032878	342159	GCTGTGTAGCGACCCAATCTTTGCC	chr11:28577221-28577245_-	chr11:28576243-28577418_-	-	141422_m6a_chr11:28576243-28577418_-	1.58407	1.20982	2.26218	1.38696	1.50956	1.55675	0.073588	0.246513	0.263558	0.0268921	0.145029	0.0285342	0.00142642	0.0385212	2	*
Ccdc85a	ENSMUSG00000032878	437791	ACTCCAGCTGTGTAGCGACCCAATC	chr11:28577215-28577239_-	chr11:28576243-28577418_-	-	141421_m6a_chr11:28576243-28577418_-	1.45693	1.61968	1.6963	0.997405	1.5797	1.62676	0.139822	0.0504774	0.373094	0.0475937	0.211144	0.00190872	0.0254659	0.0871815	3	*
Ccdc85a	ENSMUSG00000032878	252985	TGCATCACTCCAGCTGTGTAGCGAC	chr11:28577209-28577233_-	chr11:28576243-28577418_-	-	141420_m6a_chr11:28576243-28577418_-	1.37711	0.858762	1.3409	1.79224	1.71737	1.74491	0.252037	-0.466834	0.0588096	0.195604	0.01003	0.0236745	0.000162535	0.566506	4
Ccdc85a	ENSMUSG00000032878	852312	TCCTTGTGCATCACTCCAGCTGTGT	chr11:28577203-28577227_-	chr11:28576243-28577418_-	-	141419_m6a_chr11:28576243-28577418_-	0.527323	0.0173348	0.6362	0.273435	0.171086	0.936425	-0.489889	-0.55853	-1.19989	1	1	0.605733	0.613083	0.95881	3
Ccdc85a	ENSMUSG00000032878	749412	GCCACTTCCTTGTGCATCACTCCAG	chr11:28577197-28577221_-	chr11:28576243-28577418_-	-	141418_m6a_chr11:28576243-28577418_-	0.7434	0.859466	0.430766	0.291852	0.0190571	0.993488	-0.287101	-1.42211	-0.887485	1	1	0.109845	0.623123	0.939461	2
Ccdc85a	ENSMUSG00000032878	644972	TATAAGGCCACTTCCTTGTGCATCA	chr11:28577191-28577215_-	chr11:28576243-28577418_-	-	141417_m6a_chr11:28576243-28577418_-	0.7239	1.15198	1.32993	1.27419	0.73991	1.01759	-0.176416	0.232892	-0.11342	0.507383	0.717518	0.037776	0.0462288	0.521518	3
Ccdc85a	ENSMUSG00000032878	931839	TGCAAGTATAAGGCCACTTCCTTGT	chr11:28577185-28577209_-	chr11:28576243-28577418_-	-	141416_m6a_chr11:28576243-28577418_-	0.689184	0.452491	0.995217	0.293307	0.391138	0.0955147	-0.458499	0.979722	0.74135	1	1	0.119682	0.957558	0.217004	2
Ccdc85a	ENSMUSG00000032878	127057	AGCTTCTGCAAGTATAAGGCCACTT	chr11:28577179-28577203_-	chr11:28576243-28577418_-	-	141415_m6a_chr11:28576243-28577418_-	0.74144	1.37797	2.02567	0.421294	0.8028	1.79949	0.399787	-1.26342	-0.183728	0.177369	0.789437	0.0644786	0.18604	0.720155	1
Ccdc85a	ENSMUSG00000032878	550149	TCCTTCAGCTTCTGCAAGTATAAGG	chr11:28577173-28577197_-	chr11:28576243-28577418_-	-	141414_m6a_chr11:28576243-28577418_-	0.769325		0.205659	0.300756	0.757686	0.946978	0.384243		0.713537	1	1	0.460107	0.284732	0.0910039	0
Ccdc85a	ENSMUSG00000032878	361252	TCCAGCTCCTTCAGCTTCTGCAAGT	chr11:28577167-28577191_-	chr11:28576243-28577418_-	-	141413_m6a_chr11:28576243-28577418_-	0.573877	0.145875	0.233562	0.327545	0.511806	1.00906	0.239273	0.153484	-0.119784	1	1	0.794028	0.370702	0.22236	0
Ccdc85a	ENSMUSG00000032878	74904	TTCACCTCCAGCTCCTTCAGCTTCT	chr11:28577161-28577185_-	chr11:28576243-28577418_-	-	141412_m6a_chr11:28576243-28577418_-	0.0626074	-0.768709	-0.730092	-0.372127	0.1864	0.200725	-0.0728416	-0.924745	-0.775753	1	1	0.962361	0.947317	0.921016	0
Ccdc85a	ENSMUSG00000032878	143465	TCCTGCTTCACCTCCAGCTCCTTCA	chr11:28577155-28577179_-	chr11:28576243-28577418_-	-	141411_m6a_chr11:28576243-28577418_-	0.181374	0.603157	-0.0620656	0.791404	0.352334	0.509329	-0.278577	0.120332	0.282465	1	1	0.804647	0.467204	0.391044	0
Ccdc85a	ENSMUSG00000032878	620385	ACCTCCTCCTGCTTCACCTCCAGCT	chr11:28577149-28577173_-	chr11:28576243-28577418_-	-	141410_m6a_chr11:28576243-28577418_-	-0.113945	0.455078	0.254521	-0.258872	-0.0539949	-0.0808909	0.00288877	0.0710953	-0.109622	1	1	0.866167	0.995465	0.504357	0
Ccdc85a	ENSMUSG00000032878	813161	TTCACCACCTCCTCCTGCTTCACCT	chr11:28577143-28577167_-	chr11:28576243-28577418_-	-	141409_m6a_chr11:28576243-28577418_-	0.129151	0.410845	0.353127	0.359724	-0.319264	0.020258	0.28624	0.484899	0.498408	1	1	0.892816	0.941007	0.0120146	0
Ccdc85a	ENSMUSG00000032878	696327	TTCTCCTTCACCACCTCCTCCTGCT	chr11:28577137-28577161_-	chr11:28576243-28577418_-	-	141408_m6a_chr11:28576243-28577418_-	-0.0116136	0.210398	0.133678	-0.11938	-0.0919388	-0.21906	-0.14953	0.0280748	0.0106613	1	1	0.982732	0.998407	0.653045	0
Ccdc85a	ENSMUSG00000032878	94786	TCCATGTTCTCCTTCACCACCTCCT	chr11:28577131-28577155_-	chr11:28576243-28577418_-	-	141407_m6a_chr11:28576243-28577418_-	0.298034	-0.0645815	0.203648	-0.498075	-0.0914853	-0.0934082	0.0524481	-0.00868868	0.198733	1	1	0.946944	0.985141	0.136649	0
Ccdc85a	ENSMUSG00000032878	769214	TTAAGTTCCATGTTCTCCTTCACCA	chr11:28577125-28577149_-	chr11:28576243-28577418_-	-	141406_m6a_chr11:28576243-28577418_-	-0.300998	0.0953855	-0.218681	-0.0720853	-0.266358	0.128709	-0.411733	-0.0692748	0.345976	1	1	0.980495	0.983335	0.554197	0
Ccdc85a	ENSMUSG00000032878	796031	AGTTCCTTAAGTTCCATGTTCTCCT	chr11:28577119-28577143_-	chr11:28576243-28577418_-	-	141405_m6a_chr11:28576243-28577418_-	-0.343476	0.901259	0.45327	0.0119395	-0.208581	0.822964	-0.306353	0.569595	0.420119	1	1	0.608984	0.798644	0.235083	0
Ccdc85a	ENSMUSG00000032878	229153	ATGCAGAGTTCCTTAAGTTCCATGT	chr11:28577113-28577137_-	chr11:28576243-28577418_-	-	141404_m6a_chr11:28576243-28577418_-	1.68361	1.49734	0.338589	2.96032	1.62071	0.533207	0.677344	0.963522	-0.626628	0.00499156	7.92725e-08	0.114323	0.119325	0.274709	0
Ccdc85a	ENSMUSG00000032878	887015	AGCAACATGCAGAGTTCCTTAAGTT	chr11:28577107-28577131_-	chr11:28576243-28577418_-	-	141403_m6a_chr11:28576243-28577418_-			1.53788		1.17097		-0.351712			3.79585e-09	8.85813e-05	1	1	1	0
Ccdc85a	ENSMUSG00000032878	131010	TCGTCCAGCAACATGCAGAGTTCCT	chr11:28577101-28577125_-	chr11:28576243-28577418_-	-	141402_m6a_chr11:28576243-28577418_-	1.6204	1.60694	0.500219	1.89113	1.69645	1.82732	0.096349	0.0437742	0.247585	0.0121786	1.18029e-05	0.0834628	0.00102132	0.0741075	0
Ccdc85a	ENSMUSG00000032878	728376	TTCTCCTCGTCCAGCAACATGCAGA	chr11:28577095-28577119_-	chr11:28576243-28577418_-	-	141401_m6a_chr11:28576243-28577418_-	0.0634031	0.36729	0.624109	-0.0941701	-0.0459075	0.336027	-0.403198	-0.153591	-0.00678521	1	1	0.70061	0.963245	0.866783	0
Ccdc85a	ENSMUSG00000032878	630952	ACGCCCTTCTCCTCGTCCAGCAACA	chr11:28577089-28577113_-	chr11:28576243-28577418_-	-	141400_m6a_chr11:28576243-28577418_-	-0.0185081	0.534218	0.47274	0.123475	-0.0307352	0.0511012	0.0438287	0.143206	0.063641	1	1	0.721909	0.995937	0.0445638	0
Ccdc85a	ENSMUSG00000032878	794089	CATCCTACGCCCTTCTCCTCGTCCA	chr11:28577083-28577107_-	chr11:28576243-28577418_-	-	141399_m6a_chr11:28576243-28577418_-	-0.578157	0.232221	0.0731758	-0.128168	-0.609948	-0.358993	-0.595391	-0.0564411	-0.00246584	1	1	0.920031	0.988582	0.805738	0
Ccdc85a	ENSMUSG00000032878	876291	CCGGCACATCCTACGCCCTTCTCCT	chr11:28577077-28577101_-	chr11:28576243-28577418_-	-	141398_m6a_chr11:28576243-28577418_-	-1.56006	-0.18219	-0.20022	-0.862253	-1.85693	-1.37055	-1.43689	-0.193442	-0.177818	1	1	0.931211	0.988982	0.854033	0
Ccdc85a	ENSMUSG00000032878	45436	CGGCTGCCGGCACATCCTACGCCCT	chr11:28577071-28577095_-	chr11:28576243-28577418_-	-	141397_m6a_chr11:28576243-28577418_-	0.644305	0.0922947	-0.0263442	0.702546	1.11746	1.5303	0.115381	0.0559742	0.167472	1	0.0871378	0.796518	0.0684187	0.0305882	0
Ccdc85a	ENSMUSG00000032878	182498	GAGCAGCGGCTGCCGGCACATCCTA	chr11:28577065-28577089_-	chr11:28576243-28577418_-	-	141396_m6a_chr11:28576243-28577418_-	1.28361	0.599965	0.856758	1.66118	1.04772	1.57335	-0.150512	-0.629903	-0.359463	0.228134	0.0062365	0.0733419	0.0217389	0.94138	0
Ccdc85a	ENSMUSG00000032878	330912	TCGATGGAGCAGCGGCTGCCGGCAC	chr11:28577059-28577083_-	chr11:28576243-28577418_-	-	141395_m6a_chr11:28576243-28577418_-	1.2017	-0.39477	0.820147	0.379135	1.23924	1.45071	0.317669	-0.825314	-0.43505	1	0.286594	0.434194	0.138868	0.769149	0
Ccdc85a	ENSMUSG00000032878	234886	TGGCTATCGATGGAGCAGCGGCTGC	chr11:28577053-28577077_-	chr11:28576243-28577418_-	-	141394_m6a_chr11:28576243-28577418_-	0.935064	1.18566	1.56308	1.3524	0.911891	1.40838	0.383627		-0.598746	0.0462999	0.0758113	0.0255616	0.0243528	0.561643	1
Ccdc85a	ENSMUSG00000032878	933930	CTGGCCTGGCTATCGATGGAGCAGC	chr11:28577047-28577071_-	chr11:28576243-28577418_-	-	141393_m6a_chr11:28576243-28577418_-	0.55435	-0.25553	-0.956472	-0.304905	-0.466114	0.500671	-0.87081	-1.36322	-0.35134	1	1	0.868015	0.914976	0.94975	0
Ccdc85a	ENSMUSG00000032878	215248	CACAGGCTGGCCTGGCTATCGATGG	chr11:28577041-28577065_-	chr11:28576243-28577418_-	-	141392_m6a_chr11:28576243-28577418_-	0.953593	-0.560723	1.23947	0.458978	0.961877	0.488629	0.323254	-1.9759	-0.598746	1	0.919079	0.442076	0.305287	0.808122	0
Ccdc85a	ENSMUSG00000032878	802620	AGCTGGCACAGGCTGGCCTGGCTAT	chr11:28577035-28577059_-	chr11:28576243-28577418_-	-	141391_m6a_chr11:28576243-28577418_-	0.11064	0.436224	-0.284995	0.300756	0.22012	0.899425	-0.343506	-1.31866	-1.53589	1	1	0.888794	0.605868	0.948711	0
Ccdc85a	ENSMUSG00000032878	334336	GCAACCAGCTGGCACAGGCTGGCCT	chr11:28577029-28577053_-	chr11:28576243-28577418_-	-	141390_m6a_chr11:28576243-28577418_-	0.381921	-2.23558	0.942325	-0.390481	0.592751	0.817498	0.298882	-1.02436	-0.302924	1	1	0.739499	0.677473	0.761294	0
Ccdc85a	ENSMUSG00000032878	148750	GCGGAGGCAACCAGCTGGCACAGGC	chr11:28577023-28577047_-	chr11:28576243-28577418_-	-	141389_m6a_chr11:28576243-28577418_-	1.15478	1.98901	-0.157632	1.66756	1.34877	1.18332	0.158272	-0.641222	-0.17341	0.974826	0.434429	0.23807	0.0130935	0.767384	0
Ccdc85a	ENSMUSG00000032878	940106	GGGGTAGCGGAGGCAACCAGCTGGC	chr11:28577017-28577041_-	chr11:28576243-28577418_-	-	141388_m6a_chr11:28576243-28577418_-	-0.100413	1.36135	1.65163	0.227679	-0.612009	-0.417508	-1.41097	-0.751882	-0.443913	1	1	0.219767	0.956801	0.952458	0
Ccdc85a	ENSMUSG00000032878	139286	ACATAGGGGGTAGCGGAGGCAACCA	chr11:28577011-28577035_-	chr11:28576243-28577418_-	-	141387_m6a_chr11:28576243-28577418_-	0.804223	1.39092	0.515966	0.697423	0.924417	0.53685	0.021449	0.913997	0.941716	1	1	0.110697	0.124821	0.0848193	0
Ccdc85a	ENSMUSG00000032878	798935	TCTCGCACATAGGGGGTAGCGGAGG	chr11:28577005-28577029_-	chr11:28576243-28577418_-	-	141386_m6a_chr11:28576243-28577418_-	1.13714	1.97768	1.02498	1.36383	0.812152	0.791201	0.205621	-0.219599	0.697112	0.335921	1	0.0454368	0.0692191	0.2311	0
Ccdc85a	ENSMUSG00000032878	460571	CCCACATCTCGCACATAGGGGGTAG	chr11:28576999-28577023_-	chr11:28576243-28577418_-	-	141385_m6a_chr11:28576243-28577418_-	0.843394	-0.011812	1.12759	1.13615	1.08598	0.816995	0.149009	-0.0703447	0.0177919	1	0.724136	0.308256	0.0205177	0.283138	0
Ccdc85a	ENSMUSG00000032878	569798	CCATCACCCACATCTCGCACATAGG	chr11:28576993-28577017_-	chr11:28576243-28577418_-	-	141384_m6a_chr11:28576243-28577418_-	0.665954	1.14262	0.749855	1.06415	1.15236	0.598429	0.523438	0.775814	0.653475	1	1	0.0560931	0.0729038	0.00594729	0
Ccdc85a	ENSMUSG00000032878	251065	CTGCTGCCATCACCCACATCTCGCA	chr11:28576987-28577011_-	chr11:28576243-28577418_-	-	141383_m6a_chr11:28576243-28577418_-	0.39561	-0.243372	0.464053	0.25881	0.289151	0.863985	0.318371	-0.508781	0.0509483	1	1	0.806019	0.619348	0.550885	0
Ccdc85a	ENSMUSG00000032878	652592	GAGGTGCTGCTGCCATCACCCACAT	chr11:28576981-28577005_-	chr11:28576243-28577418_-	-	141382_m6a_chr11:28576243-28577418_-	-0.183857	0.623054	-0.0146923	0.295097	0.0812596	0.419479	-0.571875	0.326237	0.408457	1	1	0.833167	0.945392	0.427029	0
Ccdc85a	ENSMUSG00000032878	616662	GTGCTAGAGGTGCTGCTGCCATCAC	chr11:28576975-28576999_-	chr11:28576243-28577418_-	-	141381_m6a_chr11:28576243-28577418_-	0.111405	0.384891	0.515671	-0.153702	0.106794	0.764086	-0.172057	0.164477	0.510578	1	1	0.781368	0.806753	0.229904	0
Ccdc85a	ENSMUSG00000032878	22270	CTGCCAGTGCTAGAGGTGCTGCTGC	chr11:28576969-28576993_-	chr11:28576243-28577418_-	-	141380_m6a_chr11:28576243-28577418_-	0.581397	0.229552	-0.00706207	0.630274	0.861453	1.0599	0.139822	0.103921	0.288824	1	0.140904	0.802832	0.0644313	0.0396901	0
Ccdc85a	ENSMUSG00000032878	27913	TCAGTACTGCCAGTGCTAGAGGTGC	chr11:28576963-28576987_-	chr11:28576243-28577418_-	-	141379_m6a_chr11:28576243-28577418_-	1.44564	-0.545475	-0.469403	1.614	1.59212	1.61756	0.0582165	-0.333413	0.213881	1	5.33816e-36	0.658728	2.76776e-05	0.519981	0
Ccdc85a	ENSMUSG00000032878	628837	GGACTATCAGTACTGCCAGTGCTAG	chr11:28576957-28576981_-	chr11:28576243-28577418_-	-	141378_m6a_chr11:28576243-28577418_-	1.36167	1.49009	-0.611074	-0.953629	0.586285	1.06996	0.0145961			0.0634297	1	0.353404	0.66658	1	0
Ccdc85a	ENSMUSG00000032878	83063	TGGTCAGGACTATCAGTACTGCCAG	chr11:28576951-28576975_-	chr11:28576243-28577418_-	-	141377_m6a_chr11:28576243-28577418_-	2.03977	2.33237	0.280567	0.873726	0.849505	0.898073	0.447615	0.20609	-0.76047	0.000107146	0.285323	0.114238	0.000875132	0.523308	0
Ccdc85a	ENSMUSG00000032878	335525	TTGTGGTGGTCAGGACTATCAGTAC	chr11:28576945-28576969_-	chr11:28576243-28577418_-	-	141376_m6a_chr11:28576243-28577418_-	1.38193	0.707181	0.903717	2.03065	1.19545	0.913732	0.614843	-0.688484	0.94475	0.885809	0.227765	0.0562678	0.0644977	0.303372	0
Ccdc85a	ENSMUSG00000032878	74155	TGGTGTTTGTGGTGGTCAGGACTAT	chr11:28576939-28576963_-	chr11:28576243-28577418_-	-	141375_m6a_chr11:28576243-28577418_-	1.39758	0.870587	0.736242	1.27474	1.617	1.35998	0.173418	-0.858436	0.80588	0.305019	0.0349323	0.0562855	0.00672229	0.462553	0
Ccdc85a	ENSMUSG00000032878	342377	CTGGCATGGTGTTTGTGGTGGTCAG	chr11:28576933-28576957_-	chr11:28576243-28577418_-	-	141374_m6a_chr11:28576243-28577418_-	1.80398	2.1131	2.16315	1.61961	1.35326	1.39735	0.519885	0.417784	0.759906	0.0103767	0.535239	0.00252417	0.00398577	0.0147574	0
Ccdc85a	ENSMUSG00000032878	729822	CCCCCACTGGCATGGTGTTTGTGGT	chr11:28576927-28576951_-	chr11:28576243-28577418_-	-	141373_m6a_chr11:28576243-28577418_-	0.547837	0.14454	-0.498273	0.310191	0.252241	0.981916	0.0373928	-0.466669	-1.20642	1	1	0.834279	0.536589	0.861311	0
Ccdc85a	ENSMUSG00000032878	943300	GGGCTTCCCCCACTGGCATGGTGTT	chr11:28576921-28576945_-	chr11:28576243-28577418_-	-	141372_m6a_chr11:28576243-28577418_-	-1.66632	-0.344224	-0.176754	-0.763621	-1.78415	-0.903708	-1.50206	-0.100398	-0.496267	1	1	0.935492	0.983036	0.879629	0
Ccdc85a	ENSMUSG00000032878	80717	TGTTCAGGGCTTCCCCCACTGGCAT	chr11:28576915-28576939_-	chr11:28576243-28577418_-	-	141371_m6a_chr11:28576243-28577418_-	0.253027	-0.427601	-0.507748	0.153279	0.325803	0.629743	-0.16744	-0.601708	0.155084	1	1	0.946792	0.82611	0.764663	0
Ccdc85a	ENSMUSG00000032878	153630	TGTAAATGTTCAGGGCTTCCCCCAC	chr11:28576909-28576933_-	chr11:28576243-28577418_-	-	141370_m6a_chr11:28576243-28577418_-	0.0591592	-0.210384	0.0795342	0.175502	0.410336	0.250365	-0.25214	-0.426393	0.147673	1	1	0.981775	0.967977	0.783853	0
Ccdc85a	ENSMUSG00000032878	920791	GGCTTCTGTAAATGTTCAGGGCTTC	chr11:28576903-28576927_-	chr11:28576243-28577418_-	-	141369_m6a_chr11:28576243-28577418_-	-2.24176		-0.405189	-0.322401	-1.01011		-0.667995		-0.927346	1	1	0.848064	0.911543	0.947982	0
Ccdc85a	ENSMUSG00000032878	866013	CTCCGGGGCTTCTGTAAATGTTCAG	chr11:28576897-28576921_-	chr11:28576243-28577418_-	-	141368_m6a_chr11:28576243-28577418_-	-0.162631	0.326046	0.60904	-0.573418	-0.250702	-0.828727	-0.489041	-0.621566	0.394243	1	1	0.760445	0.98863	0.725283	0
Ccdc85a	ENSMUSG00000032878	414412	CCCTCGCTCCGGGGCTTCTGTAAAT	chr11:28576891-28576915_-	chr11:28576243-28577418_-	-	141367_m6a_chr11:28576243-28577418_-	0.729561	0.544371	0.584724	0.370286	0.474141	0.62883	0.311247	0.37141	-0.176751	1	1	0.0482765	0.705871	0.204464	0
Ccdc85a	ENSMUSG00000032878	269406	GGGCTGCCCTCGCTCCGGGGCTTCT	chr11:28576885-28576909_-	chr11:28576243-28577418_-	-	141366_m6a_chr11:28576243-28577418_-	0.417375	0.117274	0.010962	0.506155	0.412512	0.395515	-0.236775	0.0575294	-0.259091	1	1	0.92169	0.950487	0.841452	0
Ccdc85a	ENSMUSG00000032878	831426	TGCTCTGGGCTGCCCTCGCTCCGGG	chr11:28576879-28576903_-	chr11:28576243-28577418_-	-	141365_m6a_chr11:28576243-28577418_-	-0.835062	-0.137462	-0.399421	-0.78306	-0.978708	-0.857597	-1.05785	-0.396338	-0.536229	1	1	0.976705	0.999187	0.958259	0
Ccdc85a	ENSMUSG00000032878	27300	TTGGTGTGCTCTGGGCTGCCCTCGC	chr11:28576873-28576897_-	chr11:28576243-28577418_-	-	141364_m6a_chr11:28576243-28577418_-	0.579977	0.726877	0.579772	0.408933	0.659319	0.935235	0.356354	0.1555	0.501333	1	1	0.0344492	0.243075	0.0367825	0
Ccdc85a	ENSMUSG00000032878	388712	CTGTGTTTGGTGTGCTCTGGGCTGC	chr11:28576867-28576891_-	chr11:28576243-28577418_-	-	141363_m6a_chr11:28576243-28577418_-	1.11205	1.22528	1.06653	1.35728	1.20924	1.25008	0.870674	0.422898	0.681871	1	1	0.00237313	0.00180304	0.0177833	0
Ccdc85a	ENSMUSG00000032878	627738	GTGCTCCTGTGTTTGGTGTGCTCTG	chr11:28576861-28576885_-	chr11:28576243-28577418_-	-	141362_m6a_chr11:28576243-28577418_-	0.455984	1.20665	0.835845	0.768812	0.576561	1.06745	0.0182629	0.441214	-0.0654602	1	1	0.110461	0.102224	0.229613	0
Ccdc85a	ENSMUSG00000032878	95316	GGGCTAGTGCTCCTGTGTTTGGTGT	chr11:28576855-28576879_-	chr11:28576243-28577418_-	-	141361_m6a_chr11:28576243-28577418_-	0.970098	0.989438	1.64684	0.827368	1.22079	1.51039	0.0356828	-0.132286	0.636153	0.628843	0.762112	0.0388997	0.041094	0.249376	1
Ccdc85a	ENSMUSG00000032878	362313	TGTTCAGGGCTAGTGCTCCTGTGTT	chr11:28576849-28576873_-	chr11:28576243-28577418_-	-	141360_m6a_chr11:28576243-28577418_-	1.68118	1.92033	1.74345	2.40877	1.5288	1.42507	0.902104	0.550469	0.449097	0.146428	0.203405	0.00144485	0.0285847	0.0212061	0
Ccdc85a	ENSMUSG00000032878	657164	TGTAGATGTTCAGGGCTAGTGCTCC	chr11:28576843-28576867_-	chr11:28576243-28577418_-	-	141359_m6a_chr11:28576243-28577418_-	0.93952	0.0717608	0.0303076	0.449641	0.302078	1.23645	-0.12727	0.375203	-0.0631153	1	1	0.621261	0.355683	0.344943	0
Ccdc85a	ENSMUSG00000032878	702683	GGTTTGTGTAGATGTTCAGGGCTAG	chr11:28576837-28576861_-	chr11:28576243-28577418_-	-	141358_m6a_chr11:28576243-28577418_-	0.479823		-0.514111	1.45839	-0.327938	0.0612273	0.58118	1.71331	0.257622	1	1	0.74083	0.590933	0.0950144	0
Ccdc85a	ENSMUSG00000032878	767840	GCCCTGGGTTTGTGTAGATGTTCAG	chr11:28576831-28576855_-	chr11:28576243-28577418_-	-	141357_m6a_chr11:28576243-28577418_-	-0.0587821	0.867564	0.598788	0.15879	-0.0269258	0.444594	-0.101509	0.448581	-1.19642	1	1	0.477913	0.936437	0.684753	0
Ccdc85a	ENSMUSG00000032878	785247	CCAGAAGCCCTGGGTTTGTGTAGAT	chr11:28576825-28576849_-	chr11:28576243-28577418_-	-	141356_m6a_chr11:28576243-28577418_-	0.00314384	1.36801	-1.19349	-2.57143	0.0433936	0.18139	-0.745722	0.155775		1	1	0.675692	0.86097	0.678834	0
Ccdc85a	ENSMUSG00000032878	385993	GGGGTCCCAGAAGCCCTGGGTTTGT	chr11:28576819-28576843_-	chr11:28576243-28577418_-	-	141355_m6a_chr11:28576243-28577418_-	1.02099	1.10568	1.10649	0.922266	1.01903	1.39792	0.537692	-0.937851	0.436648	0.396536	0.439789	0.0010243	0.0291968	0.482632	1
Ccdc85a	ENSMUSG00000032878	934955	TGATCTGGGGTCCCAGAAGCCCTGG	chr11:28576813-28576837_-	chr11:28576243-28577418_-	-	141354_m6a_chr11:28576243-28577418_-	-0.421367	0.197307	0.276235	0.0252759	-0.402353	0.210522	-1.45453	-0.357669	0.038986	1	1	0.906205	0.959063	0.83812	0
Ccdc85a	ENSMUSG00000032878	798207	TTGGAGTGATCTGGGGTCCCAGAAG	chr11:28576807-28576831_-	chr11:28576243-28577418_-	-	141353_m6a_chr11:28576243-28577418_-	-0.50115	-0.623779	0.353353	0.307476	0.232799	-0.17522	-0.767434	0.727958	-0.428413	1	1	0.926312	0.945731	0.61026	0
Ccdc85a	ENSMUSG00000032878	322452	AGTGCTTTGGAGTGATCTGGGGTCC	chr11:28576801-28576825_-	chr11:28576243-28577418_-	-	141352_m6a_chr11:28576243-28577418_-	1.24615	0.36909	1.39423	0.805934	0.940791	1.53124	0.298087	-0.0917648	-0.243023	0.18792	0.156955	0.11352	0.0654218	0.502201	0
Ccdc85a	ENSMUSG00000032878	193529	CCTTTCAGTGCTTTGGAGTGATCTG	chr11:28576795-28576819_-	chr11:28576243-28577418_-	-	141351_m6a_chr11:28576243-28577418_-	0.957099	-0.683232	1.56308	1.63969	1.20629	0.241707	0.638493	0.532039	0.631052	1	1	0.416699	0.178658	0.00156552	0
Ccdc85a	ENSMUSG00000032878	807337	CTGGGTCCTTTCAGTGCTTTGGAGT	chr11:28576789-28576813_-	chr11:28576243-28577418_-	-	141350_m6a_chr11:28576243-28577418_-	0.568573	1.3181	1.03169	0.532702	0.281545	0.0423968	-0.213787	-0.978768	0.282993	0.279166	1	0.0699235	0.89242	0.745152	0
Ccdc85a	ENSMUSG00000032878	580301	TCAGGGCTGGGTCCTTTCAGTGCTT	chr11:28576783-28576807_-	chr11:28576243-28577418_-	-	141349_m6a_chr11:28576243-28577418_-	0.794917	0.980861	1.24352	0.66575	1.02835	1.32655	0.566976	0.197733	0.232174	0.533059	0.637148	0.0254577	0.0670326	0.0500839	0
Ccdc85a	ENSMUSG00000032878	900044	TGGTGCTCAGGGCTGGGTCCTTTCA	chr11:28576777-28576801_-	chr11:28576243-28577418_-	-	141348_m6a_chr11:28576243-28577418_-	0.494483	1.06599	0.229381	0.197338	0.373845	0.738433	0.073588	0.0547607	0.657747	1	1	0.30862	0.707121	0.150726	0
Ccdc85a	ENSMUSG00000032878	747607	GGCTTGTGGTGCTCAGGGCTGGGTC	chr11:28576771-28576795_-	chr11:28576243-28577418_-	-	141347_m6a_chr11:28576243-28577418_-	0.100237	0.679906	-0.176308	-0.390685	-0.330401	0.951317	-0.291722	-0.176933	0.161025	1	1	0.787472	0.799236	0.714588	0
Ccdc85a	ENSMUSG00000032878	224471	CACAAGGGCTTGTGGTGCTCAGGGC	chr11:28576765-28576789_-	chr11:28576243-28577418_-	-	141346_m6a_chr11:28576243-28577418_-	1.12284	1.41105	1.36244	0.925757	0.943835	1.11136	0.264126	-0.0129388	0.654107	0.451868	1	0.00544332	0.00823959	0.123561	1
Ccdc85a	ENSMUSG00000032878	687789	CCCTTGCACAAGGGCTTGTGGTGCT	chr11:28576759-28576783_-	chr11:28576243-28577418_-	-	141345_m6a_chr11:28576243-28577418_-	0.769325	0.122959	2.07815	1.03693	0.152864	2.94043	0.352124	-2.29805	1.18446	0.530868	0.137359	0.224093	0.207797	0.580619	0
Ccdc85a	ENSMUSG00000032878	897946	GGGCTGCCCTTGCACAAGGGCTTGT	chr11:28576753-28576777_-	chr11:28576243-28577418_-	-	141344_m6a_chr11:28576243-28577418_-	-0.747231	-0.281486	0.428453	0.204	-0.407562	-0.945756	-0.978053	-0.271827	-1.04937	1	1	0.901663	0.945537	0.953432	0
Ccdc85a	ENSMUSG00000032878	37570	TGCTCGGGGCTGCCCTTGCACAAGG	chr11:28576747-28576771_-	chr11:28576243-28577418_-	-	141343_m6a_chr11:28576243-28577418_-	0.530601	-0.365926	0.209055	0.106218	0.772217	0.950667	0.0315407	-1.45044	-0.771135	1	1	0.830918	0.404618	0.882344	0
Ccdc85a	ENSMUSG00000032878	511039	CTCTGCTGCTCGGGGCTGCCCTTGC	chr11:28576741-28576765_-	chr11:28576243-28577418_-	-	141342_m6a_chr11:28576243-28577418_-	0.504334	0.699473	0.340978	0.369434	0.623687	0.284603	0.574943	0.264876	0.0615036	1	1	0.302675	0.808863	0.0860296	0
Ccdc85a	ENSMUSG00000032878	262845	GGGTGCCTCTGCTGCTCGGGGCTGC	chr11:28576735-28576759_-	chr11:28576243-28577418_-	-	141341_m6a_chr11:28576243-28577418_-	0.523436	0.408378	0.341805	1.27909	0.561442	0.315257	0.662484	0.256317	0.111187	1	1	0.671771	0.298997	0.082325	0
Ccdc85a	ENSMUSG00000032878	923966	GGATGTGGGTGCCTCTGCTGCTCGG	chr11:28576729-28576753_-	chr11:28576243-28577418_-	-	141340_m6a_chr11:28576243-28577418_-	-1.64737	0.00918176	0.161867	-0.454433	-1.4708	-0.800509	-1.40803	0.147541	-0.119834	1	1	0.877635	0.980029	0.775705	0
Ccdc85a	ENSMUSG00000032878	144358	CTCCCTGGATGTGGGTGCCTCTGCT	chr11:28576723-28576747_-	chr11:28576243-28577418_-	-	141339_m6a_chr11:28576243-28577418_-	0.239621	-0.114516	0.324987	0.255858	0.377789	0.908937	0.232608	-0.0951761	0.438101	1	1	0.923014	0.54372	0.160537	0
Ccdc85a	ENSMUSG00000032878	260612	GGGCTGCTCCCTGGATGTGGGTGCC	chr11:28576717-28576741_-	chr11:28576243-28577418_-	-	141338_m6a_chr11:28576243-28577418_-	0.665186	0.544881	0.643751	0.872722	0.576537	0.638558	-0.0087221	0.665757	0.338862	1	1	0.0231998	0.112059	0.110033	0
Ccdc85a	ENSMUSG00000032878	575636	ACTTCTGGGCTGCTCCCTGGATGTG	chr11:28576711-28576735_-	chr11:28576243-28577418_-	-	141337_m6a_chr11:28576243-28577418_-	0.2373	0.484402	0.388018	0.114532	0.0234473	0.219787	-0.0754947	0.366447	0.0733808	1	1	0.81404	0.991114	0.207142	0
Ccdc85a	ENSMUSG00000032878	761179	GGCAGCACTTCTGGGCTGCTCCCTG	chr11:28576705-28576729_-	chr11:28576243-28577418_-	-	141336_m6a_chr11:28576243-28577418_-	-0.0939565	0.0985629	0.467485	-0.182247	-0.453356	0.0133051	-0.351671	-0.243999	0.947179	1	1	0.892213	0.984343	0.393425	0
Ccdc85a	ENSMUSG00000032878	6581	TGCTTGGGCAGCACTTCTGGGCTGC	chr11:28576699-28576723_-	chr11:28576243-28577418_-	-	141335_m6a_chr11:28576243-28577418_-	0.507801	0.0233093	-0.524299		0.409974	1.06996	0.189377	-1.11311	0.880461	1	1	0.864765	0.325938	0.501932	0
Ccdc85a	ENSMUSG00000032878	945244	AACACGTGCTTGGGCAGCACTTCTG	chr11:28576693-28576717_-	chr11:28576243-28577418_-	-	141334_m6a_chr11:28576243-28577418_-	-0.813788	-0.868477	-0.997224	-1.18729	-0.589218	1.31687	-0.667995	-2.49321	-1.19642	1	1	0.999185	0.772004	0.941413	0
Ccdc85a	ENSMUSG00000032878	65352	CCACTCAACACGTGCTTGGGCAGCA	chr11:28576687-28576711_-	chr11:28576243-28577418_-	-	141333_m6a_chr11:28576243-28577418_-	0.936276	0.102585	1.04006	1.33615	1.44711	1.42756	-0.123376	-0.489284	1.05291	1	0.575434	0.250988	0.000780422	0.38326	0
Ccdc85a	ENSMUSG00000032878	245532	GGGCTCCCACTCAACACGTGCTTGG	chr11:28576681-28576705_-	chr11:28576243-28577418_-	-	141332_m6a_chr11:28576243-28577418_-	0.511278	-0.0248737	0.35549	0.239637	0.534657	0.655287	0.0278378	-0.602201	-0.269664	1	1	0.802773	0.668643	0.862006	0
Ccdc85a	ENSMUSG00000032878	835700	TGTTCAGGGCTCCCACTCAACACGT	chr11:28576675-28576699_-	chr11:28576243-28577418_-	-	141331_m6a_chr11:28576243-28577418_-	-0.597052	0.252253	0.535628	0.166391	-0.447181	0.0992235	-0.673912	0.183848	0.354555	1	1	0.814001	0.954543	0.537602	0
Ccdc85a	ENSMUSG00000032878	324896	TGGAAATGTTCAGGGCTCCCACTCA	chr11:28576669-28576693_-	chr11:28576243-28577418_-	-	141330_m6a_chr11:28576243-28577418_-	0.87934	0.797618	1.02135	1.51283	0.76745	0.727433	0.447045	0.420036	0.583732	1	1	0.0103397	0.105607	0.0051611	0
Ccdc85a	ENSMUSG00000032878	236512	TGCTTCTGGAAATGTTCAGGGCTCC	chr11:28576663-28576687_-	chr11:28576243-28577418_-	-	141329_m6a_chr11:28576243-28577418_-	0.936324	0.810365	0.520088	0.632994	0.558155	1.44053	0.61984	0.843223	-0.621608	0.854694	0.523112	0.0663684	0.176963	0.293788	0
Ccdc85a	ENSMUSG00000032878	369596	GGCCTATGCTTCTGGAAATGTTCAG	chr11:28576657-28576681_-	chr11:28576243-28577418_-	-	141328_m6a_chr11:28576243-28577418_-	0.762232	-0.0322373		0.287331	0.495818	0.410547	0.2722	-1.6239	0.707631	1	1	0.568621	0.927575	0.598534	0
Ccdc85a	ENSMUSG00000032878	690717	CCTCCTGGCCTATGCTTCTGGAAAT	chr11:28576651-28576675_-	chr11:28576243-28577418_-	-	141327_m6a_chr11:28576243-28577418_-	0.435641	0.847008	0.563465	1.47297	0.551119	0.830767	0.563914	0.0702279	0.0864902	1	0.120646	0.155539	0.134865	0.130328	0
Ccdc85a	ENSMUSG00000032878	728550	GGGCTGCCTCCTGGCCTATGCTTCT	chr11:28576645-28576669_-	chr11:28576243-28577418_-	-	141326_m6a_chr11:28576243-28577418_-	-0.259529	0.192967	0.244523	-0.265612	-0.340967	0.0357644	-0.443083	0.0351649	0.220732	1	1	0.933139	0.987996	0.58999	0
Ccdc85a	ENSMUSG00000032878	288273	TGTTCCGGGCTGCCTCCTGGCCTAT	chr11:28576639-28576663_-	chr11:28576243-28577418_-	-	141325_m6a_chr11:28576243-28577418_-	0.415181	-0.756634	0.209152	-0.218388	0.213104	0.494486	0.0497264	-0.80833	0.268441	1	1	0.848346	0.894312	0.655587	0
Ccdc85a	ENSMUSG00000032878	645088	CTGGTGTGTTCCGGGCTGCCTCCTG	chr11:28576633-28576657_-	chr11:28576243-28577418_-	-	141324_m6a_chr11:28576243-28577418_-	-0.026615	0.191378	0.232313	-0.117984	-0.201981	0.241907	-0.198655	0.0204472	0.0526598	1	1	0.971106	0.973285	0.632234	0
Ccdc85a	ENSMUSG00000032878	650338	CTGTGCCTGGTGTGTTCCGGGCTGC	chr11:28576627-28576651_-	chr11:28576243-28577418_-	-	141323_m6a_chr11:28576243-28577418_-	0.174671	0.745171	0.776878	0.309847	0.285413	1.08292	-0.244276	-0.119767	0.303411	0.308404	0.419613	0.310128	0.472618	0.519142	0
Ccdc85a	ENSMUSG00000032878	896506	CCTCCACTGTGCCTGGTGTGTTCCG	chr11:28576621-28576645_-	chr11:28576243-28577418_-	-	141322_m6a_chr11:28576243-28577418_-	0.854382	1.27616	0.891527	1.17236	0.428787	0.922682	0.0720319	0.800629	0.120441	0.23606	0.81608	0.0270959	0.150388	0.141442	0
Ccdc85a	ENSMUSG00000032878	657381	GGGCTCCCTCCACTGTGCCTGGTGT	chr11:28576615-28576639_-	chr11:28576243-28577418_-	-	141321_m6a_chr11:28576243-28577418_-	-0.0744669	0.30246	0.306334	0.0452986	-0.0539811	0.013414	-0.133138	0.276046	0.223057	1	1	0.918812	0.998524	0.204352	0
Ccdc85a	ENSMUSG00000032878	115688	TGCTCAGGGCTCCCTCCACTGTGCC	chr11:28576609-28576633_-	chr11:28576243-28577418_-	-	141320_m6a_chr11:28576243-28577418_-	0.254612	-0.3951	-0.556308	0.15017	0.26219	0.583866	0.0159421	-0.454191	-0.886535	1	1	0.945011	0.873869	0.879777	0
Ccdc85a	ENSMUSG00000032878	816149	TGAAGATGCTCAGGGCTCCCTCCAC	chr11:28576603-28576627_-	chr11:28576243-28577418_-	-	141319_m6a_chr11:28576243-28577418_-	-0.807074	0.358102	0.319836	-0.19589	-0.597373	-0.441062	-0.649225	0.36569	0.0112676	1	1	0.837712	0.992612	0.592899	0
Ccdc85a	ENSMUSG00000032878	699424	TGTTTCTGAAGATGCTCAGGGCTCC	chr11:28576597-28576621_-	chr11:28576243-28577418_-	-	141318_m6a_chr11:28576243-28577418_-	0.839219	0.997244	1.04987	1.16565	1.25765	0.856787	0.404915	0.238211	0.61385	0.642092	0.359676	0.00752457	0.0223293	0.0291381	0
Ccdc85a	ENSMUSG00000032878	936994	AGGGCATGTTTCTGAAGATGCTCAG	chr11:28576591-28576615_-	chr11:28576243-28577418_-	-	141317_m6a_chr11:28576243-28577418_-	-1.10252	0.0787766	0.749083	-0.584786	0.327409	0.625251	-1.10979	1.34095		1	1	0.789485	0.814476	0.467176	0
Ccdc85a	ENSMUSG00000032878	96610	CCACCAAGGGCATGTTTCTGAAGAT	chr11:28576585-28576609_-	chr11:28576243-28577418_-	-	141316_m6a_chr11:28576243-28577418_-	0.0333007		-0.100389		0.487011	-0.587043				1	1	0.956451	0.764708	1	0
Ccdc85a	ENSMUSG00000032878	290080	AGGCTCCCACCAAGGGCATGTTTCT	chr11:28576579-28576603_-	chr11:28576243-28577418_-	-	141315_m6a_chr11:28576243-28577418_-	0.887144	0.215459	1.24892	0.20462	0.541433	1.28707	0.0467142	-0.356697	0.229409	0.0360552	0.201858	0.193707	0.353479	0.531846	0
Ccdc85a	ENSMUSG00000032878	293661	TGCTCCAGGCTCCCACCAAGGGCAT	chr11:28576573-28576597_-	chr11:28576243-28577418_-	-	141314_m6a_chr11:28576243-28577418_-	0.526282	0.158669	0.528343	0.205648	0.134463	0.475271	0.0854401	-0.265806	0.276594	1	1	0.631966	0.938262	0.405347	0
Ccdc85a	ENSMUSG00000032878	550991	GGGAGGTGCTCCAGGCTCCCACCAA	chr11:28576567-28576591_-	chr11:28576243-28577418_-	-	141313_m6a_chr11:28576243-28577418_-	0.220202	-0.434428	0.255374	-0.430082	-0.216707	0.193847	-0.0367035	-0.259638	0.125257	1	1	0.90504	0.968131	0.639373	0
Ccdc85a	ENSMUSG00000032878	419184	GCTCTGGGGAGGTGCTCCAGGCTCC	chr11:28576561-28576585_-	chr11:28576243-28577418_-	-	141312_m6a_chr11:28576243-28577418_-	0.810343	1.02373	0.443972	1.85454	0.923092	0.864936	0.739746	0.288854	0.179496	0.876753	0.00564111	0.105545	0.084927	0.0685721	0
Ccdc85a	ENSMUSG00000032878	673536	CCCCTGGCTCTGGGGAGGTGCTCCA	chr11:28576555-28576579_-	chr11:28576243-28577418_-	-	141311_m6a_chr11:28576243-28577418_-	0.578175	0.827089	0.693494	0.434813	0.243312	0.666129	-0.301673	0.0363626	0.155118	0.389328	1	0.0375008	0.732899	0.565324	0
Ccdc85a	ENSMUSG00000032878	759869	CTTGTTCCCCTGGCTCTGGGGAGGT	chr11:28576549-28576573_-	chr11:28576243-28577418_-	-	141310_m6a_chr11:28576243-28577418_-	0.69544	1.09072	0.575551	0.816868	0.259103	0.649367	0.547825	0.576955	0.191999	1	1	0.0820304	0.423806	0.0339794	0
Ccdc85a	ENSMUSG00000032878	439802	TCTGGGCTTGTTCCCCTGGCTCTGG	chr11:28576543-28576567_-	chr11:28576243-28577418_-	-	141309_m6a_chr11:28576243-28577418_-	0.60595	0.513711	0.575822	0.181512	0.515456	0.87585	0.00867034	0.36513	0.141369	1	1	0.0265161	0.526079	0.110331	0
Ccdc85a	ENSMUSG00000032878	19710	AGATGCTCTGGGCTTGTTCCCCTGG	chr11:28576537-28576561_-	chr11:28576243-28577418_-	-	141308_m6a_chr11:28576243-28577418_-	0.416929	-0.0297329	0.0603688	0.436978	0.599941	1.27303	0.44055	0.0589867	-0.184757	1	1	0.921721	0.231051	0.294296	0
Ccdc85a	ENSMUSG00000032878	20252	TGTTTGAGATGCTCTGGGCTTGTTC	chr11:28576531-28576555_-	chr11:28576243-28577418_-	-	141307_m6a_chr11:28576243-28577418_-	0.8467	0.73114	0.402412	0.534529	0.873825	1.06989	0.251542	0.162734	1.13083	1	1	0.12917	0.103943	0.115309	0
Ccdc85a	ENSMUSG00000032878	796352	TAATGTTGTTTGAGATGCTCTGGGC	chr11:28576525-28576549_-	chr11:28576243-28577418_-	-	141306_m6a_chr11:28576243-28577418_-	0.319187	0.00970453	0.973253	0.146367	-0.397356	0.989784	-0.738476	0.191467	0.213881	1	1	0.522305	0.728255	0.609722	0
Ccdc85a	ENSMUSG00000032878	187159	GCCCCGTAATGTTGTTTGAGATGCT	chr11:28576519-28576543_-	chr11:28576243-28577418_-	-	141305_m6a_chr11:28576243-28577418_-	0.603262	0.360517	-0.191273	0.716887	0.851213	0.596703	0.175285	-2.44261	-0.0659403	1	0.971533	0.752474	0.0655302	0.772158	0
Ccdc85a	ENSMUSG00000032878	551182	GGGCTGGCCCCGTAATGTTGTTTGA	chr11:28576513-28576537_-	chr11:28576243-28577418_-	-	141304_m6a_chr11:28576243-28577418_-	0.21782	0.28826	0.880039	0.152787	0.471097	1.02309	0.255655	0.0724998	-0.784353	1	1	0.483079	0.486224	0.648349	0
Ccdc85a	ENSMUSG00000032878	363347	TGATCAGGGCTGGCCCCGTAATGTT	chr11:28576507-28576531_-	chr11:28576243-28577418_-	-	141303_m6a_chr11:28576243-28577418_-	0.492394	0.582455	0.792036	0.68328	0.549394	1.18959	0.514534	0.865098	-0.576923	1	1	0.097515	0.151266	0.293294	0
Ccdc85a	ENSMUSG00000032878	333168	TGTTTGTGATCAGGGCTGGCCCCGT	chr11:28576501-28576525_-	chr11:28576243-28577418_-	-	141302_m6a_chr11:28576243-28577418_-	1.10426	0.653925	1.15903	0.483624	0.916215	1.29575	0.277847	0.482712	0.407468	0.916133	1	0.0414766	0.132592	0.0107944	0
Ccdc85a	ENSMUSG00000032878	845304	CTTGCATGTTTGTGATCAGGGCTGG	chr11:28576495-28576519_-	chr11:28576243-28577418_-	-	141301_m6a_chr11:28576243-28577418_-	0.463348	1.85691	0.503774	0.400265	0.194993	0.511506	-0.430789	0.227662	-0.171564	0.134609	1	0.198563	0.896075	0.693499	0
Ccdc85a	ENSMUSG00000032878	383819	CTGCCACTTGCATGTTTGTGATCAG	chr11:28576489-28576513_-	chr11:28576243-28577418_-	-	141300_m6a_chr11:28576243-28577418_-	0.621349	-0.683232	0.463912	0.423411	0.712653	1.57023	0.138935	0.192211	-0.539447	1	0.000715451	0.739906	0.201168	0.586072	0
Ccdc85a	ENSMUSG00000032878	311810	CCTCCACTGCCACTTGCATGTTTGT	chr11:28576483-28576507_-	chr11:28576243-28577418_-	-	141299_m6a_chr11:28576243-28577418_-	0.58288	0.699842	-0.0960859	0.493468	0.448735	1.11592	-0.0327433	0.358732	-0.120628	0.834777	0.0399318	0.5794	0.282685	0.321407	0
Ccdc85a	ENSMUSG00000032878	90125	CCGCTGCCTCCACTGCCACTTGCAT	chr11:28576477-28576501_-	chr11:28576243-28577418_-	-	141298_m6a_chr11:28576243-28577418_-	0.208989	0.482786	0.0632119	0.289985	0.408551	0.189395	-0.19453	-0.376695	0.329699	1	1	0.87755	0.969168	0.612702	0
Ccdc85a	ENSMUSG00000032878	272896	CCCCCGCCGCTGCCTCCACTGCCAC	chr11:28576471-28576495_-	chr11:28576243-28577418_-	-	141297_m6a_chr11:28576243-28577418_-	0.379972	-0.1406	0.121642	0.193626	0.276557	0.0505243	-0.0197409	0.059261	0.113959	1	1	0.920979	0.984447	0.124582	0
Ccdc85a	ENSMUSG00000032878	580067	CTGCTGCCCCCGCCGCTGCCTCCAC	chr11:28576465-28576489_-	chr11:28576243-28577418_-	-	141296_m6a_chr11:28576243-28577418_-	0.0504669	0.190415	-0.0530404	-0.306174	0.0246652	-0.0958929	0.0746683	0.0996716	0.0336902	1	1	0.984355	0.989754	0.026263	0
Ccdc85a	ENSMUSG00000032878	582995	CCTTCCCTGCTGCCCCCGCCGCTGC	chr11:28576459-28576483_-	chr11:28576243-28577418_-	-	141295_m6a_chr11:28576243-28577418_-	0.0303034	0.103605	0.165039	-0.396996	-0.211192	-0.111473	0.0478804	-0.0333903	-0.316647	1	1	0.994001	0.99433	0.748498	0
Ccdc85a	ENSMUSG00000032878	616423	AGGGTGCCTTCCCTGCTGCCCCCGC	chr11:28576453-28576477_-	chr11:28576243-28577418_-	-	141294_m6a_chr11:28576243-28577418_-	-0.0194845	-0.450853	-0.508733	-0.687816	-0.0389016	0.0408297	-0.150253	-0.466708	-0.649602	1	1	0.981428	0.960156	0.946867	0
Ccdc85a	ENSMUSG00000032878	272911	CGCCGGAGGGTGCCTTCCCTGCTGC	chr11:28576447-28576471_-	chr11:28576243-28577418_-	-	141293_m6a_chr11:28576243-28577418_-	0.504294	0.00427796	0.340185	0.445355	0.408485	0.633325	-0.270823	-0.329167	0.128648	1	0.50409	0.815271	0.701519	0.79135	0
Ccdc85a	ENSMUSG00000032878	487374	GCAGGCCGCCGGAGGGTGCCTTCCC	chr11:28576441-28576465_-	chr11:28576243-28577418_-	-	141292_m6a_chr11:28576243-28577418_-	0.367441	0.25648	0.211314	-0.445627	0.198207	0.765838	-0.195718	-0.253031	-0.67939	1	1	0.967713	0.797446	0.930362	0
Ccdc85a	ENSMUSG00000032878	365005	TCTTGAGCAGGCCGCCGGAGGGTGC	chr11:28576435-28576459_-	chr11:28576243-28577418_-	-	141291_m6a_chr11:28576243-28577418_-	1.10764	0.690457	1.11877	1.11023	1.3588	1.12995	0.379463	0.0392635	0.223033	0.3	0.0808828	0.0330931	0.0071361	0.0745775	1
Ccdc85a	ENSMUSG00000032878	158545	GAATCCTCTTGAGCAGGCCGCCGGA	chr11:28576429-28576453_-	chr11:28576243-28577418_-	-	141290_m6a_chr11:28576243-28577418_-	0.932204	-0.191246	-0.643985	0.420305	0.876706	0.678929	0.111447	-0.591899	-0.109442	1	0.693713	0.767529	0.23053	0.766911	0
Ccdc85a	ENSMUSG00000032878	348215	GATGATGAATCCTCTTGAGCAGGCC	chr11:28576423-28576447_-	chr11:28576243-28577418_-	-	141289_m6a_chr11:28576243-28577418_-	1.0111	0.169453	-0.0260415	-0.34479	0.557583	0.822964	1.26632	-0.266729	-0.897394	1	1	0.573797	0.680782	0.475105	0
Ccdc85a	ENSMUSG00000032878	944841	TGATGGGATGATGAATCCTCTTGAG	chr11:28576417-28576441_-	chr11:28576243-28577418_-	-	141288_m6a_chr11:28576243-28577418_-	0.275786		1.79428		-1.30903	0.727791		0.899231	-0.106824	0.709702	1	0.291546	0.71761	0.283299	0
Ccdc85a	ENSMUSG00000032878	883007	TTCCGGTGATGGGATGATGAATCCT	chr11:28576411-28576435_-	chr11:28576243-28577418_-	-	141287_m6a_chr11:28576243-28577418_-		0.979108	-0.348169	1.10431	0.0371489	1.05069	-1.28051	0.427687	-0.76047	1	0.483298	0.564578	0.318181	0.796507	0
Ccdc85a	ENSMUSG00000032878	721689	TAGACATTCCGGTGATGGGATGATG	chr11:28576405-28576429_-	chr11:28576243-28577418_-	-	141286_m6a_chr11:28576243-28577418_-	0.263157	1.49801	1.03103	0.991187	0.606805	1.01308	-0.0401435	-0.642911	-0.365549	0.127609	0.273501	0.157468	0.064342	0.904198	0
Ccdc85a	ENSMUSG00000032878	585689	CCGCTGTAGACATTCCGGTGATGGG	chr11:28576399-28576423_-	chr11:28576243-28577418_-	-	141285_m6a_chr11:28576243-28577418_-	1.75696	2.02502	1.63172	1.54966	1.8287	1.46489	0.508008	0.343968	-0.0472157	0.000309163	0.00612779	0.00363761	0.00514223	0.115892	1
Ccdc85a	ENSMUSG00000032878	533424	TTCATGCCGCTGTAGACATTCCGGT	chr11:28576393-28576417_-	chr11:28576243-28577418_-	-	141284_m6a_chr11:28576243-28577418_-	0.916651	1.45254	1.47102	1.40858	1.08335	1.37346	-0.0220473	-0.40844	0.0412881	0.00638558	0.0111861	0.0224833	0.00919599	0.756046	2	**
Ccdc85a	ENSMUSG00000032878	531195	CCACCATTCATGCCGCTGTAGACAT	chr11:28576387-28576411_-	chr11:28576243-28577418_-	-	141283_m6a_chr11:28576243-28577418_-	0.343031	0.0388059	0.0277894	0.524444	0.632763	0.913732	0.117857	0.342693	-1.15748	1	0.485721	0.953711	0.161105	0.658682	1
Ccdc85a	ENSMUSG00000032878	212993	ACTGACCCACCATTCATGCCGCTGT	chr11:28576381-28576405_-	chr11:28576243-28577418_-	-	141282_m6a_chr11:28576243-28577418_-	0.495771	0.994779	0.35875	1.37429	0.709462	1.12751	0.590854	-0.0830121	0.451934	1	1	0.242223	0.0557448	0.124133	0
Ccdc85a	ENSMUSG00000032878	181788	GCATATACTGACCCACCATTCATGC	chr11:28576375-28576399_-	chr11:28576243-28577418_-	-	141281_m6a_chr11:28576243-28577418_-	0.358417	0.855272	0.936544	-0.32036	0.245509	0.859248	0.297083	0.532039	-0.213901	1	1	0.140237	0.749665	0.214755	0
Ccdc85a	ENSMUSG00000032878	480084	CTCCCAGCATATACTGACCCACCAT	chr11:28576369-28576393_-	chr11:28576243-28577418_-	-	141280_m6a_chr11:28576243-28577418_-	0.192015	-0.980729	-1.105	0.455572	0.654863	0.980571	-0.097533	0.0817027	-0.200716	1	1	0.940056	0.205249	0.731505	0
Ccdc85a	ENSMUSG00000032878	217988	AAGCAGCTCCCAGCATATACTGACC	chr11:28576363-28576387_-	chr11:28576243-28577418_-	-	141279_m6a_chr11:28576243-28577418_-	0.162113	-0.354451	0.451138	0.96798	0.491302	0.732257	-0.137507	-0.142097	0.479521	1	1	0.86959	0.149367	0.371148	0
Ccdc85a	ENSMUSG00000032878	579328	AAGCCAAAGCAGCTCCCAGCATATA	chr11:28576357-28576381_-	chr11:28576243-28577418_-	-	141278_m6a_chr11:28576243-28577418_-	0.111478	0.106102	-1.3682	-0.428177	-0.0900864	-0.361665	-0.573396	-1.82442	-1.19642	1	1	0.884112	0.992457	0.959281	0
Ccdc85a	ENSMUSG00000032878	147521	GTTGCCAAGCCAAAGCAGCTCCCAG	chr11:28576351-28576375_-	chr11:28576243-28577418_-	-	141277_m6a_chr11:28576243-28577418_-	0.507795	0.311784	-0.349575	1.819	1.44338	0.619386	0.681874	-0.824686	-0.624188	1	0.865359	0.813559	0.0834119	0.671825	0
Ccdc85a	ENSMUSG00000032878	665628	TACTGAGTTGCCAAGCCAAAGCAGC	chr11:28576345-28576369_-	chr11:28576243-28577418_-	-	141276_m6a_chr11:28576243-28577418_-	0.775126	0.343409		1.98557	1.40692	1.06996	0.351509	-0.859819	0.372749	1	0.557914	0.35318	0.0355512	0.52942	0
Ccdc85a	ENSMUSG00000032878	37454	ACGGTCTACTGAGTTGCCAAGCCAA	chr11:28576339-28576363_-	chr11:28576243-28577418_-	-	141275_m6a_chr11:28576243-28577418_-	0.771503	-0.970834	-0.526067	0.564486	0.984873	1.17337	0.427186			1	1	0.842186	0.0885918	1	0
Ccdc85a	ENSMUSG00000032878	828450	TTCATAACGGTCTACTGAGTTGCCA	chr11:28576333-28576357_-	chr11:28576243-28577418_-	-	141274_m6a_chr11:28576243-28577418_-	-1.27265		0.422905	-2.33575	-0.705513	0.950344	0.156611	2.39308		1	1	0.755367	0.838799	0.227815	0
Ccdc85a	ENSMUSG00000032878	766754	TTTGCATTCATAACGGTCTACTGAG	chr11:28576327-28576351_-	chr11:28576243-28577418_-	-	141273_m6a_chr11:28576243-28577418_-	-0.640406			1.28778	0.910259	1.27422	-0.111827		0.2758	1	0.626273	1	0.0188676	0.357302	0
Ccdc85a	ENSMUSG00000032878	70991	ATCCCCTTTGCATTCATAACGGTCT	chr11:28576321-28576345_-	chr11:28576243-28577418_-	-	141272_m6a_chr11:28576243-28577418_-	0.982598		0.137683	1.60131	0.977352	2.44789	-0.136156	-1.09057	1.12877	1	0.0614838	0.420221	0.0582654	0.511781	0
Ccdc85a	ENSMUSG00000032878	753509	CTGGAGATCCCCTTTGCATTCATAA	chr11:28576315-28576339_-	chr11:28576243-28577418_-	-	141271_m6a_chr11:28576243-28577418_-	0.272509	-0.0397584	1.36448	-0.172334	-0.0505487	0.946978	-0.134346	-0.349367	0.500419	1	1	0.43379	0.75527	0.476742	0
Ccdc85a	ENSMUSG00000032878	565153	ATACTGCTGGAGATCCCCTTTGCAT	chr11:28576309-28576333_-	chr11:28576243-28577418_-	-	141270_m6a_chr11:28576243-28577418_-	0.300229	-1.69204	0.402412	-0.510175	0.779094	1.41671	0.347834	0.284888	-0.41115	1	1	0.81491	0.485785	0.379916	0
Ccdc85a	ENSMUSG00000032878	382772	TTCCTAATACTGCTGGAGATCCCCT	chr11:28576303-28576327_-	chr11:28576243-28577418_-	-	141269_m6a_chr11:28576243-28577418_-	0.0626263	0.211232	0.858199	0.240894	0.765659	1.00099	0.259268	-0.650905	0.0483628	0.271104	0.00105202	0.605606	0.310529	0.628207	0
Ccdc85a	ENSMUSG00000032878	746825	TCCATTTTCCTAATACTGCTGGAGA	chr11:28576297-28576321_-	chr11:28576243-28577418_-	-	141268_m6a_chr11:28576243-28577418_-	0.444913		0.40473	0.078134	0.695181	1.6519	-0.44485	0.0611174		0.0981441	5.95234e-06	0.79728	0.307966	0.697376	0
Ccdc85a	ENSMUSG00000032878	850872	CAAAGCTCCATTTTCCTAATACTGC	chr11:28576291-28576315_-	chr11:28576243-28577418_-	-	141267_m6a_chr11:28576243-28577418_-		-0.0960953	0.066417	-0.613173	-0.0375795		0.03563			1	1	0.945144	0.897702	1	0
Ccdc85a	ENSMUSG00000032878	919711	CTTAGCCAAAGCTCCATTTTCCTAA	chr11:28576285-28576309_-	chr11:28576243-28577418_-	-	141266_m6a_chr11:28576243-28577418_-	-0.664965			0.273888	-0.382682		0.142339		0.48526	1	1	1	0.83917	0.154515	0
Ccdc85a	ENSMUSG00000032878	833761	CCGCCCCTTAGCCAAAGCTCCATTT	chr11:28576279-28576303_-	chr11:28576243-28577418_-	-	141265_m6a_chr11:28576243-28577418_-	-0.739172	0.668765	0.654566	-0.0972664	-0.558835	-0.234043	-0.795064	0.44332	0.248268	1	1	0.681497	0.987106	0.521374	0
Ccdc85a	ENSMUSG00000032878	13524	ATCTACCCGCCCCTTAGCCAAAGCT	chr11:28576273-28576297_-	chr11:28576243-28577418_-	-	141264_m6a_chr11:28576243-28577418_-	0.100983	-0.141915	-0.4996	-0.239211	0.455922	0.628703	0.238357	-0.135567	-0.114523	1	1	0.965794	0.78281	0.478684	0
Ccdc85a	ENSMUSG00000032878	66302	TCTCCTATCTACCCGCCCCTTAGCC	chr11:28576267-28576291_-	chr11:28576243-28577418_-	-	141263_m6a_chr11:28576243-28577418_-	0.104871	-0.11175	0.238695	-0.427017	0.284206	0.533747	0.150508	-0.487672	0.0391631	1	1	0.966559	0.8543	0.650891	0
Ccdc85a	ENSMUSG00000032878	945933	GTTAGGTCTCCTATCTACCCGCCCC	chr11:28576261-28576285_-	chr11:28576243-28577418_-	-	141262_m6a_chr11:28576243-28577418_-	-0.679663	-0.233964	-0.0165202	0.192838	-0.444841	-0.152861	-0.436367	0.201815	-0.0349973	1	1	0.970111	0.966349	0.643002	0
Ccdc85a	ENSMUSG00000032878	73716	GCAAATGTTAGGTCTCCTATCTACC	chr11:28576255-28576279_-	chr11:28576243-28577418_-	-	141261_m6a_chr11:28576243-28577418_-	-0.0200023	-0.499415	0.472108	0.247558	0.630555	0.091567	0.1317	0.130206	-0.386286	1	1	0.881354	0.844983	0.561519	0
Ccdc85a	ENSMUSG00000032878	15550	TTCCTGGCAAATGTTAGGTCTCCTA	chr11:28576249-28576273_-	chr11:28576243-28577418_-	-	141260_m6a_chr11:28576243-28577418_-	-0.0591477	0.698953	1.47573	1.2836	0.663146	2.24875	-0.406218	-0.131251	-0.21104	1	0.285516	0.312683	0.10175	0.949925	0
Ccdc85a	ENSMUSG00000032878	476891	TTTTTATTCCTGGCAAATGTTAGGT	chr11:28576243-28576267_-	chr11:28576243-28577418_-	-	141259_m6a_chr11:28576243-28577418_-	-0.203048	1.48566		0.201741	0.593547	1.27422		1.38353	0.76807	1	1	0.42979	0.338952	0.0878137	0
Ier5	ENSMUSG00000056708	39746	AGACAACAGAACCGTTCTGAGCCGG	chr1:155099598-155099622_-	chr1:155097804-155099623_-	-	44353_m6a_chr1:155097804-155099623_-	1.19856	1.0613	1.44364	0.527188	1.04755	1.1873	-0.167343	-0.701661	-0.630638	0.538596	1	0.0099311	0.0458981	0.944901	1
Ier5	ENSMUSG00000056708	823285	CCCTTCAGACAACAGAACCGTTCTG	chr1:155099592-155099616_-	chr1:155097804-155099623_-	-	44352_m6a_chr1:155097804-155099623_-	0.708759	0.431927	0.51172	-0.728936	0.470453	1.47743	-0.362302		-0.308104	1	1	0.178115	0.44382	0.971064	0
Ier5	ENSMUSG00000056708	303365	CCGCTTCCCTTCAGACAACAGAACC	chr1:155099586-155099610_-	chr1:155097804-155099623_-	-	44351_m6a_chr1:155097804-155099623_-	0.899484	1.36131	0.856263	1.55345	0.816836	0.822278	0.170512	0.333159	0.586298	1	1	0.0341725	0.0449476	0.0400612	0
Ier5	ENSMUSG00000056708	798897	CCTCCGCCGCTTCCCTTCAGACAAC	chr1:155099580-155099604_-	chr1:155097804-155099623_-	-	44350_m6a_chr1:155097804-155099623_-	0.333763	0.876844	0.631362	0.527845	0.0145578	-0.0485981	0.396	0.824355	0.646772	1	1	0.20642	0.738018	0.0168177	0
Ier5	ENSMUSG00000056708	477598	AGTCCCCCTCCGCCGCTTCCCTTCA	chr1:155099574-155099598_-	chr1:155097804-155099623_-	-	44349_m6a_chr1:155097804-155099623_-	0.566657	0.582851	0.330719	0.959946	0.621415	0.450638	0.826971	0.523958	0.137756	1	1	0.33425	0.0651313	0.0578553	0
Ier5	ENSMUSG00000056708	102327	ACGCGTAGTCCCCCTCCGCCGCTTC	chr1:155099568-155099592_-	chr1:155097804-155099623_-	-	44348_m6a_chr1:155097804-155099623_-	0.286897	0.365611	0.241037	-0.13347	0.346307	0.197505	-0.0317736	-0.0843587	0.428301	1	1	0.974568	0.820606	0.237588	0
Ier5	ENSMUSG00000056708	204145	CTGGTGACGCGTAGTCCCCCTCCGC	chr1:155099562-155099586_-	chr1:155097804-155099623_-	-	44347_m6a_chr1:155097804-155099623_-	0.657966	0.480466	0.74958	1.28758	0.491055	0.432528	0.411111	0.192617	0.128929	1	1	0.0775739	0.128595	0.0403815	0
Ier5	ENSMUSG00000056708	503094	AAAGACCTGGTGACGCGTAGTCCCC	chr1:155099556-155099580_-	chr1:155097804-155099623_-	-	44346_m6a_chr1:155097804-155099623_-	1.35566	1.6944	0.726774	0.62446	0.694003	1.02446	0.19225	0.292574	0.390175	1	1	0.0523198	0.030475	0.0143816	0
Ier5	ENSMUSG00000056708	452810	TGGAGAAAAGACCTGGTGACGCGTA	chr1:155099550-155099574_-	chr1:155097804-155099623_-	-	44345_m6a_chr1:155097804-155099623_-	1.00101	-0.280394		-0.953629	-0.0790454	-0.411971	-0.629613	-1.18595		1	1	0.545695	0.954483	0.901481	0
Ier5	ENSMUSG00000056708	21134	GCTCGGTGGAGAAAAGACCTGGTGA	chr1:155099544-155099568_-	chr1:155097804-155099623_-	-	44344_m6a_chr1:155097804-155099623_-	1.19592	0.26624	0.422905	0.983115	0.937241	0.960586	0.166991	-0.0222356	1.5079	1	1	0.301833	0.00020367	0.173005	0
Ier5	ENSMUSG00000056708	865249	CTGAAAGCTCGGTGGAGAAAAGACC	chr1:155099538-155099562_-	chr1:155097804-155099623_-	-	44343_m6a_chr1:155097804-155099623_-	0.282524	-0.280394				-0.0721853	-0.924887			1	1	0.822675	1	1	0
Ier5	ENSMUSG00000056708	388684	CGGCGTCTGAAAGCTCGGTGGAGAA	chr1:155099532-155099556_-	chr1:155097804-155099623_-	-	44342_m6a_chr1:155097804-155099623_-	1.73403	1.68083	1.64711	1.80801	1.41239	0.787005	0.627716	0.278672	-0.359463	0.235507	0.786304	0.000209916	0.0369696	0.262829	1
Ier5	ENSMUSG00000056708	95873	TACCCTCGGCGTCTGAAAGCTCGGT	chr1:155099526-155099550_-	chr1:155097804-155099623_-	-	44341_m6a_chr1:155097804-155099623_-	1.10624	1.96418	1.19881	1.28629	0.917714	1.20483	0.462416	0.851615	0.426237	1	1	0.0351721	0.00878952	0.022636	0
Ier5	ENSMUSG00000056708	505650	TGGTTGTACCCTCGGCGTCTGAAAG	chr1:155099520-155099544_-	chr1:155097804-155099623_-	-	44340_m6a_chr1:155097804-155099623_-	1.42511	1.16207	1.02331	1.37449	0.787836	0.843716	0.621455	0.125922	-0.161264	0.492839	0.996813	0.0118835	0.0324409	0.207416	1
Ier5	ENSMUSG00000056708	28966	CCTCTGTGGTTGTACCCTCGGCGTC	chr1:155099514-155099538_-	chr1:155097804-155099623_-	-	44339_m6a_chr1:155097804-155099623_-	0.958258	0.26625	0.679788	-0.0522845	0.771818	0.949333	0.314215	-0.546285	0.0936422	1	1	0.230586	0.249996	0.511257	0
Ier5	ENSMUSG00000056708	106407	GGTCTTCCTCTGTGGTTGTACCCTC	chr1:155099508-155099532_-	chr1:155097804-155099623_-	-	44338_m6a_chr1:155097804-155099623_-	1.09332	1.25904	1.30773	1.60207	0.899786	0.769191	0.279131	0.241872	0.773486	0.0702066	0.322858	0.00354052	0.0466748	0.0556972	1
Ier5	ENSMUSG00000056708	57443	GGATCAGGTCTTCCTCTGTGGTTGT	chr1:155099502-155099526_-	chr1:155097804-155099623_-	-	44337_m6a_chr1:155097804-155099623_-	0.810625	0.830767	0.85151	0.23102	0.555679	1.01871	0.0536193	-0.429173	0.438401	0.306171	1	0.000486653	0.161409	0.418183	0
Ier5	ENSMUSG00000056708	158372	TAGGCGGGATCAGGTCTTCCTCTGT	chr1:155099496-155099520_-	chr1:155097804-155099623_-	-	44336_m6a_chr1:155097804-155099623_-	0.997891	0.26625	0.371629	0.265244	0.542731	1.05918	0.209964	-0.176828	-0.128268	1	1	0.362547	0.152469	0.481952	0
Ier5	ENSMUSG00000056708	701563	GAGCTGTAGGCGGGATCAGGTCTTC	chr1:155099490-155099514_-	chr1:155097804-155099623_-	-	44335_m6a_chr1:155097804-155099623_-	1.16514	1.5715	0.634492	0.247558	0.753226	0.839959	-0.166796	-0.186568	-0.381062	0.182579	1	0.0659744	0.118038	0.952976	0
Ier5	ENSMUSG00000056708	404524	CGAGAGGAGCTGTAGGCGGGATCAG	chr1:155099484-155099508_-	chr1:155097804-155099623_-	-	44334_m6a_chr1:155097804-155099623_-	1.86702	1.98963	2.04316	1.13143	1.61623	1.35661	0.298859	-0.142097	0.151521	4.98834e-05	0.0542585	0.00059207	0.00844992	0.195563	1
Ier5	ENSMUSG00000056708	396058	AAGCTGCGAGAGGAGCTGTAGGCGG	chr1:155099478-155099502_-	chr1:155097804-155099623_-	-	44333_m6a_chr1:155097804-155099623_-	1.22598	1.04529	0.696444	1.66046	1.31217	0.845242	0.614243	0.105098	0.548448	1	0.389013	0.0373425	0.0273271	0.0511787	2
Ier5	ENSMUSG00000056708	408975	CTTCTGAAGCTGCGAGAGGAGCTGT	chr1:155099472-155099496_-	chr1:155097804-155099623_-	-	44332_m6a_chr1:155097804-155099623_-	0.773969	2.33237	1.7109	0.662917	1.28881	0.143168	0.0640432	1.72631		0.615253	1	0.0629351	0.178151	0.231623	1
Ier5	ENSMUSG00000056708	452121	GCTTGCCTTCTGAAGCTGCGAGAGG	chr1:155099466-155099490_-	chr1:155097804-155099623_-	-	44331_m6a_chr1:155097804-155099623_-	1.21846	1.50217	1.10649	0.309107	0.701066	0.805163	0.0150616	0.361686	-0.0170005	0.146428	1	0.00993683	0.0923254	0.161357	0
Ier5	ENSMUSG00000056708	38736	ACGCCTGCTTGCCTTCTGAAGCTGC	chr1:155099460-155099484_-	chr1:155097804-155099623_-	-	44330_m6a_chr1:155097804-155099623_-	0.0971482	-0.219941	-0.289275	0.233893	0.42387	0.348557	-0.209886	-0.116001	-0.0302098	1	1	0.980855	0.315021	0.870093	0
Ier5	ENSMUSG00000056708	359377	GGGTGAACGCCTGCTTGCCTTCTGA	chr1:155099454-155099478_-	chr1:155097804-155099623_-	-	44329_m6a_chr1:155097804-155099623_-	0.510955	-0.0768771	-0.120823	0.0530032	0.211855	0.464703	0.147958	0.0488027	-0.157035	1	1	0.88541	0.669649	0.313185	0
Ier5	ENSMUSG00000056708	140804	ACGATAGGGTGAACGCCTGCTTGCC	chr1:155099448-155099472_-	chr1:155097804-155099623_-	-	44328_m6a_chr1:155097804-155099623_-	0.409308	-0.0275831	0.000802079	-0.0193667	0.284328	0.34398	-0.0153919	-0.0393371	-0.00323347	1	1	0.926212	0.768646	0.11075	0
Ier5	ENSMUSG00000056708	648183	TTCCAGACGATAGGGTGAACGCCTG	chr1:155099442-155099466_-	chr1:155097804-155099623_-	-	44327_m6a_chr1:155097804-155099623_-	1.14688	1.92033	0.787588	1.01245	0.561946	1.11046	-0.194966	-0.468496	-0.981146	0.00040083	0.0924563	0.0652492	0.0364685	0.921402	0
Ier5	ENSMUSG00000056708	702996	CTTCGCTTCCAGACGATAGGGTGAA	chr1:155099436-155099460_-	chr1:155097804-155099623_-	-	44326_m6a_chr1:155097804-155099623_-	1.21145	1.45254	1.28043	1.48322	1.52827	1.32786	0.549338	0.0787741	0.319651	0.0122823	0.00449058	0.00342366	0.00140654	0.0605928	1
Ier5	ENSMUSG00000056708	24236	TCCTGCCTTCGCTTCCAGACGATAG	chr1:155099430-155099454_-	chr1:155097804-155099623_-	-	44325_m6a_chr1:155097804-155099623_-	0.671529	0.591144	0.558053	0.500965	0.773545	1.20538	-0.127477	-0.0477242	0.184399	0.540885	0.146342	0.0223449	0.062869	0.352015	0
Ier5	ENSMUSG00000056708	670888	ACTCCATCCTGCCTTCGCTTCCAGA	chr1:155099424-155099448_-	chr1:155097804-155099623_-	-	44324_m6a_chr1:155097804-155099623_-	0.507462	0.875442	1.05306	0.816551	0.487748	0.360526	0.320487	0.202045	0.452448	0.850404	1	0.0774868	0.103202	0.0187457	0
Ier5	ENSMUSG00000056708	419797	GCTTGAACTCCATCCTGCCTTCGCT	chr1:155099418-155099442_-	chr1:155097804-155099623_-	-	44323_m6a_chr1:155097804-155099623_-	0.866964	0.52447	0.90712	0.164335	0.534053	0.751258	0.158596	0.162545	0.398153	0.695081	1	0.0615425	0.203025	0.036301	0
Ier5	ENSMUSG00000056708	203706	CCTCCAGCTTGAACTCCATCCTGCC	chr1:155099412-155099436_-	chr1:155097804-155099623_-	-	44322_m6a_chr1:155097804-155099623_-	0.887973	0.84956	0.656235	0.922697	0.567968	0.942824	-0.130653	-0.173432	0.130259	0.00981199	0.0144582	0.0202935	0.026568	0.573753	1
Ier5	ENSMUSG00000056708	134353	GGTGAGCCTCCAGCTTGAACTCCAT	chr1:155099406-155099430_-	chr1:155097804-155099623_-	-	44321_m6a_chr1:155097804-155099623_-	0.952518	1.1657	0.284662	0.52981	0.850168	0.907474	-0.121041	0.0297776	0.250515	0.00103869	0.00505352	0.160017	0.0299653	0.243869	0
Ier5	ENSMUSG00000056708	239491	CGATGCGGTGAGCCTCCAGCTTGAA	chr1:155099400-155099424_-	chr1:155097804-155099623_-	-	44320_m6a_chr1:155097804-155099623_-	1.21968	1.5263	1.08974	1.82938	0.856394	1.0301	0.035308	0.32018	-0.221659	1.91891e-10	3.21165e-09	0.0118499	0.0446386	0.325281	1
Ier5	ENSMUSG00000056708	209368	TGCTGACGATGCGGTGAGCCTCCAG	chr1:155099394-155099418_-	chr1:155097804-155099623_-	-	44319_m6a_chr1:155097804-155099623_-	1.29082	1.49644	1.19622	1.54713	0.894747	1.03216	0.390969	-0.0516931	-0.00570928	8.38712e-16	4.69108e-11	0.00505216	0.0250358	0.199908	2	**
Ier5	ENSMUSG00000056708	947552	GGGAGATGCTGACGATGCGGTGAGC	chr1:155099388-155099412_-	chr1:155097804-155099623_-	-	44318_m6a_chr1:155097804-155099623_-	0.13976	1.1506		0.301524	-0.0423413	0.0755395	-0.565187	0.184569	-0.395038	0.00231496	1	0.384298	0.901888	0.783247	1
Ier5	ENSMUSG00000056708	110629	TGCCCAGGGAGATGCTGACGATGCG	chr1:155099382-155099406_-	chr1:155097804-155099623_-	-	44317_m6a_chr1:155097804-155099623_-	1.49354	0.718054	2.17153	0.420579	1.45008	1.2275	-0.320772	0.325049	0.296361	0.00432807	0.244521	0.0691847	0.0726193	0.289668	0
Ier5	ENSMUSG00000056708	151401	AGATCTTGCCCAGGGAGATGCTGAC	chr1:155099376-155099400_-	chr1:155097804-155099623_-	-	44316_m6a_chr1:155097804-155099623_-	1.15689	0.520187	1.41076	0.673936	0.594113	0.704631	0.41398	0.205617	-0.411954	0.173226	1	0.0807691	0.00429176	0.353919	0
Ier5	ENSMUSG00000056708	678225	AGTTGTAGATCTTGCCCAGGGAGAT	chr1:155099370-155099394_-	chr1:155097804-155099623_-	-	44315_m6a_chr1:155097804-155099623_-	0.868092	2.11114	0.558331	1.37495	0.681876	0.774957	0.302446	-1.2387	1.1997	0.0781117	0.4447	0.132753	0.0492752	0.438046	0
Ier5	ENSMUSG00000056708	454158	CCCGCGAGTTGTAGATCTTGCCCAG	chr1:155099364-155099388_-	chr1:155097804-155099623_-	-	44314_m6a_chr1:155097804-155099623_-	1.27487	1.40391	1.37444	0.68651	0.892403	0.692474	-0.0270199	0.721395	0.115609	0.0777195	1	0.000942049	0.0108035	0.15581	1
Ier5	ENSMUSG00000056708	943012	GCTGGACCCGCGAGTTGTAGATCTT	chr1:155099358-155099382_-	chr1:155097804-155099623_-	-	44313_m6a_chr1:155097804-155099623_-	-0.273999	0.666457	1.43802	-0.262711	-0.546426	-0.0568418	-1.4829	-0.407272	-0.716195	0.937243	1	0.390427	0.973606	0.939173	0
Ier5	ENSMUSG00000056708	611467	CGCCGCGCTGGACCCGCGAGTTGTA	chr1:155099352-155099376_-	chr1:155097804-155099623_-	-	44312_m6a_chr1:155097804-155099623_-	0.720565	0.820957	0.913374	-0.662321	0.456465	0.95323	-0.115453	-0.325565	-0.541926	0.363573	1	0.0112201	0.540722	0.928564	0
Ier5	ENSMUSG00000056708	765137	TGATGCCGCCGCGCTGGACCCGCGA	chr1:155099346-155099370_-	chr1:155097804-155099623_-	-	44311_m6a_chr1:155097804-155099623_-	-0.0124885	0.0463763	0.210527	0.401749	0.00630339	-0.110519	0.0138874	0.291621	0.105261	1	1	0.984606	0.841666	0.0828864	0
Ier5	ENSMUSG00000056708	756371	GCAGCTTGATGCCGCCGCGCTGGAC	chr1:155099340-155099364_-	chr1:155097804-155099623_-	-	44310_m6a_chr1:155097804-155099623_-	0.380093	0.196563	0.203825	0.763902	0.0232166	0.533651	0.337666	-0.076356	-0.118691	1	1	0.957621	0.298958	0.3083	0
Ier5	ENSMUSG00000056708	618696	TCTTGTGCAGCTTGATGCCGCCGCG	chr1:155099334-155099358_-	chr1:155097804-155099623_-	-	44309_m6a_chr1:155097804-155099623_-	0.0230458	0.310266	0.228419	-0.4384	-0.261891	0.113891	-0.224767	0.223394	-0.487317	1	1	0.955148	0.954106	0.695923	0
Ier5	ENSMUSG00000056708	789358	AGAGGTTCTTGTGCAGCTTGATGCC	chr1:155099328-155099352_-	chr1:155097804-155099623_-	-	44308_m6a_chr1:155097804-155099623_-	0.0207898	0.684548	0.0606133	-0.171815	-0.25406	0.0393559	-0.669614	-0.274065	0.339316	1	1	0.772532	0.980816	0.683275	0
Ier5	ENSMUSG00000056708	354339	ACACCAAGAGGTTCTTGTGCAGCTT	chr1:155099322-155099346_-	chr1:155097804-155099623_-	-	44307_m6a_chr1:155097804-155099623_-	0.234203	0.431927		-0.70382	0.208945	0.210734	-0.0507324	-1.71003	-1.17797	1	1	0.780461	0.839818	0.902951	0
Ier5	ENSMUSG00000056708	126465	CCAACGACACCAAGAGGTTCTTGTG	chr1:155099316-155099340_-	chr1:155097804-155099623_-	-	44306_m6a_chr1:155097804-155099623_-	0.550179	-0.683232		0.078134	0.557658	-0.967432	0.0113011		-2.14317	1	1	0.722818	0.772954	0.742559	0
Ier5	ENSMUSG00000056708	276913	GCAGCACCAACGACACCAAGAGGTT	chr1:155099310-155099334_-	chr1:155097804-155099623_-	-	44305_m6a_chr1:155097804-155099623_-	0.748458	1.79026	1.50089	1.12413	0.792455	0.0423968	0.507939	-0.0544485	-0.326457	0.0667355	1	0.0512479	0.194821	0.387452	0
Ier5	ENSMUSG00000056708	43833	CGCTGCGCAGCACCAACGACACCAA	chr1:155099304-155099328_-	chr1:155097804-155099623_-	-	44304_m6a_chr1:155097804-155099623_-	1.04449		-0.212942	-0.148578	0.993641	0.936754	-0.390474	0.880566	-0.461649	1	1	0.518785	0.258689	0.461674	0
Ier5	ENSMUSG00000056708	905555	GGCGGGCGCTGCGCAGCACCAACGA	chr1:155099298-155099322_-	chr1:155097804-155099623_-	-	44303_m6a_chr1:155097804-155099623_-	-0.745339	-0.011254	0.137683		-0.380304	0.500671	-0.252671	0.327782	-0.598746	1	1	0.931482	0.661103	0.668274	0
Ier5	ENSMUSG00000056708	827941	AGACTTGGCGGGCGCTGCGCAGCAC	chr1:155099292-155099316_-	chr1:155097804-155099623_-	-	44302_m6a_chr1:155097804-155099623_-	0.340266	0.994779	1.09854	-0.946191	-0.143932	0.0909042	-0.947799	-0.114652	0.228283	0.614836	1	0.135129	0.910272	0.718648	0
Ier5	ENSMUSG00000056708	533615	TCAGGTAGACTTGGCGGGCGCTGCG	chr1:155099286-155099310_-	chr1:155097804-155099623_-	-	44301_m6a_chr1:155097804-155099623_-	0.804938	0.778915	1.38222	0.725271	0.517678	0.904499	0.118198	-0.256791	0.0613164	0.000286961	0.0519711	0.0563472	0.0332508	0.463235	0
Ier5	ENSMUSG00000056708	621212	GGTCACTCAGGTAGACTTGGCGGGC	chr1:155099280-155099304_-	chr1:155097804-155099623_-	-	44300_m6a_chr1:155097804-155099623_-	1.20161	1.16172	1.78446	0.689298	1.03833	0.532163	0.554907	0.482712	-0.108798	0.0125126	1	0.0219046	0.0476974	0.120068	1
Ier5	ENSMUSG00000056708	357079	GGCAGGGGTCACTCAGGTAGACTTG	chr1:155099274-155099298_-	chr1:155097804-155099623_-	-	44299_m6a_chr1:155097804-155099623_-	1.2769	1.12984	0.451138	1.27484	0.977852	1.41636	0.645998	-1.3151	-0.177142	0.0387717	0.00335902	0.0941805	0.00960697	0.64528	0
Ier5	ENSMUSG00000056708	304260	GGCCAGGGCAGGGGTCACTCAGGTA	chr1:155099268-155099292_-	chr1:155097804-155099623_-	-	44298_m6a_chr1:155097804-155099623_-	1.19027	0.491599	0.94722	0.0663085	0.603028	0.929937	0.239341	-0.104041	0.132405	0.182617	1	0.0872893	0.22972	0.168357	0
Ier5	ENSMUSG00000056708	153881	GGTAGAGGCCAGGGCAGGGGTCACT	chr1:155099262-155099286_-	chr1:155097804-155099623_-	-	44297_m6a_chr1:155097804-155099623_-	0.584021	0.653925	0.227244	0.796022	0.842358	0.960296	0.0069023	-0.153191	-0.814157	1	0.179656	0.406739	0.00374445	0.810949	0
Ier5	ENSMUSG00000056708	593149	CAGCCAGGTAGAGGCCAGGGCAGGG	chr1:155099256-155099280_-	chr1:155097804-155099623_-	-	44296_m6a_chr1:155097804-155099623_-	1.02312	0.845979	-0.196797	0.29885	0.356838	0.713008	0.433468	-1.35139	-1.16796	0.81303	1	0.404686	0.180765	0.817042	0
Ier5	ENSMUSG00000056708	78823	CAGGGCCAGCCAGGTAGAGGCCAGG	chr1:155099250-155099274_-	chr1:155097804-155099623_-	-	44295_m6a_chr1:155097804-155099623_-	0.516293	0.0147049	0.369865	0.517709	0.40609	0.803481	-0.244517	-0.342108	-0.262161	1	1	0.793419	0.0743924	0.992656	0
Ier5	ENSMUSG00000056708	424972	TCCCCGCAGGGCCAGCCAGGTAGAG	chr1:155099244-155099268_-	chr1:155097804-155099623_-	-	44294_m6a_chr1:155097804-155099623_-	0.743639	0.162494	-0.115306	-0.249694	0.656921	0.821253	0.509084	-1.29769	0.60123	1	1	0.733797	0.391032	0.514027	0
Ier5	ENSMUSG00000056708	513095	CCGGGGTCCCCGCAGGGCCAGCCAG	chr1:155099238-155099262_-	chr1:155097804-155099623_-	-	44293_m6a_chr1:155097804-155099623_-	0.915614	0.00669951	0.501343	1.07842	0.519384	0.494696	0.531909	0.0469351	-0.260681	1	1	0.47094	0.0876065	0.298133	0
Ier5	ENSMUSG00000056708	521769	GCACCGCCGGGGTCCCCGCAGGGCC	chr1:155099232-155099256_-	chr1:155097804-155099623_-	-	44292_m6a_chr1:155097804-155099623_-	0.524126	0.455132	0.0844179	0.455187	0.307454	0.0258752	0.383676	-0.284742	-0.622453	1	1	0.726961	0.61347	0.655268	0
Ier5	ENSMUSG00000056708	114808	GCGGCGGCACCGCCGGGGTCCCCGC	chr1:155099226-155099250_-	chr1:155097804-155099623_-	-	44291_m6a_chr1:155097804-155099623_-	0.113774	0.073402	-0.397663	-0.540494	0.121917	0.334118	-0.481658	-1.19695	-2.32957	1	1	0.957009	0.832955	0.931376	0
Ier5	ENSMUSG00000056708	233364	GCTGAGGCGGCGGCACCGCCGGGGT	chr1:155099220-155099244_-	chr1:155097804-155099623_-	-	44290_m6a_chr1:155097804-155099623_-	0.824343		0.753613	0.445563	-0.0342542	0.882282	0.346731	-2.52601	0.817075	1	1	0.0333747	0.339508	0.635543	0
Ier5	ENSMUSG00000056708	468599	CAGGCTGCTGAGGCGGCGGCACCGC	chr1:155099214-155099238_-	chr1:155097804-155099623_-	-	44289_m6a_chr1:155097804-155099623_-	0.572126	0.726696	0.529214	0.893188	0.803023	0.500868	0.778723	0	0.0119574	1	1	0.0604468	0.0344855	0.181223	0
Ier5	ENSMUSG00000056708	539473	GCTCTCCAGGCTGCTGAGGCGGCGG	chr1:155099208-155099232_-	chr1:155097804-155099623_-	-	44288_m6a_chr1:155097804-155099623_-	0.833636	1.00011	0.812444	0.667522	0.655153	0.675265	0.555786	0.222683	0.237403	1	1	0.00929462	0.000131094	0.037068	0
Ier5	ENSMUSG00000056708	65240	CTACAGGCTCTCCAGGCTGCTGAGG	chr1:155099202-155099226_-	chr1:155097804-155099623_-	-	44287_m6a_chr1:155097804-155099623_-	0.466019	0.388959	-0.507741	0.179386	0.669763	0.803631	0.117431	-0.898283	-0.000557412	1	1	0.80326	0.161683	0.720245	0
Ier5	ENSMUSG00000056708	504588	GCCCGGCTACAGGCTCTCCAGGCTG	chr1:155099196-155099220_-	chr1:155097804-155099623_-	-	44286_m6a_chr1:155097804-155099623_-	0.603916	-0.398979	-0.268929	-0.235691	0.31318	0.781791	0.0582544	-0.661593	-1.4277	1	1	0.864507	0.521515	0.862612	0
Ier5	ENSMUSG00000056708	244545	AGGGTGGCCCGGCTACAGGCTCTCC	chr1:155099190-155099214_-	chr1:155097804-155099623_-	-	44285_m6a_chr1:155097804-155099623_-	0.50939	0.84807	0.336741	0.576169	0.280955	0.240288	-0.0862436	-0.052279	-0.535943	1	1	0.267077	0.310053	0.823352	0
Ier5	ENSMUSG00000056708	857956	AGCCGGAGGGTGGCCCGGCTACAGG	chr1:155099184-155099208_-	chr1:155097804-155099623_-	-	44284_m6a_chr1:155097804-155099623_-	-0.750251	0.326104	-0.567078	-1.25978	-0.647311	0.0273075	-1.52131	-0.286926	-0.844048	1	1	0.928696	0.935386	0.929411	0
Ier5	ENSMUSG00000056708	17611	CTCCCCAGCCGGAGGGTGGCCCGGC	chr1:155099178-155099202_-	chr1:155097804-155099623_-	-	44283_m6a_chr1:155097804-155099623_-	0.441153	-0.0352739	-0.0398364	0.523503	0.426801	0.539237	0.196903	-1.37919	-0.427682	1	1	0.913082	0.0159325	0.804949	0
Ier5	ENSMUSG00000056708	580776	GCGGCTCTCCCCAGCCGGAGGGTGG	chr1:155099172-155099196_-	chr1:155097804-155099623_-	-	44282_m6a_chr1:155097804-155099623_-	-0.0606663	-0.937328	-1.13784	-0.489891	-0.612527	0.114983	-0.41103	-0.402058	-0.85438	1	1	0.963991	0.946854	0.963	0
Ier5	ENSMUSG00000056708	723613	GCGGGGGCGGCTCTCCCCAGCCGGA	chr1:155099166-155099190_-	chr1:155097804-155099623_-	-	44281_m6a_chr1:155097804-155099623_-	-0.854681	0.240591	0.174722	-0.817133	-0.695719	-0.388144	-0.916402	0.189007	0.111593	1	1	0.883471	0.990987	0.657602	0
Ier5	ENSMUSG00000056708	826699	CGACCGGCGGGGGCGGCTCTCCCCA	chr1:155099160-155099184_-	chr1:155097804-155099623_-	-	44280_m6a_chr1:155097804-155099623_-	-1.24955	-0.163142	-0.0553807	-0.948392	-1.21825	-0.751367	-0.958032	0.229365	0.305342	1	1	0.933945	0.994478	0.587799	0
Ier5	ENSMUSG00000056708	392234	CACGGGCGACCGGCGGGGGCGGCTC	chr1:155099154-155099178_-	chr1:155097804-155099623_-	-	44279_m6a_chr1:155097804-155099623_-	0.157019	1.2282	0.309874	0.457963	0.388538	-0.0603091	0.538276	1.11059	1.21275	1	1	0.3847	0.590492	0.0209908	0
Ier5	ENSMUSG00000056708	93789	AGGCGGCACGGGCGACCGGCGGGGG	chr1:155099148-155099172_-	chr1:155097804-155099623_-	-	44278_m6a_chr1:155097804-155099623_-	0.138287	0.532677	0.322698	0.333352	0.322088	-0.504137	-0.286091	0.332955	0.430051	1	1	0.80136	0.771735	0.236302	0
Ier5	ENSMUSG00000056708	611200	CCGGCCAGGCGGCACGGGCGACCGG	chr1:155099142-155099166_-	chr1:155097804-155099623_-	-	44277_m6a_chr1:155097804-155099623_-	-0.31513	0.211232	-0.504588	-0.298711	0.102528	0.78045	0.021449	-2.78773	-0.218966	1	1	0.953934	0.619459	0.800727	0
Ier5	ENSMUSG00000056708	910995	CGGGCTCCGGCCAGGCGGCACGGGC	chr1:155099136-155099160_-	chr1:155097804-155099623_-	-	44276_m6a_chr1:155097804-155099623_-	-0.640495	0.489062	0.0732043	-1.30474	-0.933964	-0.556188	-0.869814	-0.452127	-0.592849	1	1	0.858213	0.985383	0.980339	0
Ier5	ENSMUSG00000056708	331605	GAGGCTCGGGCTCCGGCCAGGCGGC	chr1:155099130-155099154_-	chr1:155097804-155099623_-	-	44275_m6a_chr1:155097804-155099623_-	0.474365	0.0773507	0.32925	0.117111	0.355153	0.0898097	-0.126811	0.0610776	-0.115574	1	1	0.848314	0.850254	0.62655	0
Ier5	ENSMUSG00000056708	120261	GCGGCTGAGGCTCGGGCTCCGGCCA	chr1:155099124-155099148_-	chr1:155097804-155099623_-	-	44274_m6a_chr1:155097804-155099623_-	0.442168	0.494274	0.52818	0.0316453	0.388412	0.263245	-0.322243	-0.117779	-0.0206226	1	1	0.146893	0.730002	0.838486	0
Ier5	ENSMUSG00000056708	658880	GAGGCTGCGGCTGAGGCTCGGGCTC	chr1:155099118-155099142_-	chr1:155097804-155099623_-	-	44273_m6a_chr1:155097804-155099623_-	-0.187979	-0.198845	-0.339055	-0.627512	-0.691666	-0.165652	-0.189101	0.0101889	-0.218281	1	1	0.997567	0.979808	0.840612	0
Ier5	ENSMUSG00000056708	657720	GAGGCTGAGGCTGCGGCTGAGGCTC	chr1:155099112-155099136_-	chr1:155097804-155099623_-	-	44272_m6a_chr1:155097804-155099623_-	-0.350485	-0.444145	0.0866515	-0.421407	-0.467993	-0.112726	-0.200824	0.0414334	0.315178	1	1	0.973992	0.985418	0.303933	0
Ier5	ENSMUSG00000056708	302038	GACGCTGAGGCTGAGGCTGCGGCTG	chr1:155099106-155099130_-	chr1:155097804-155099623_-	-	44271_m6a_chr1:155097804-155099623_-	0.520453	0.25105	-0.169227	0.353768	0.349051	0.639551	0.562117	-0.0528677	-0.257091	1	0.822237	0.832107	0.137348	0.334684	0
Ier5	ENSMUSG00000056708	427424	CGGAGGGACGCTGAGGCTGAGGCTG	chr1:155099100-155099124_-	chr1:155097804-155099623_-	-	44270_m6a_chr1:155097804-155099623_-	1.1172	1.61113	1.64711	0.759884	1.12129	0.972158	0.23527	-0.0865386	0.0656236	2.84641e-10	0.00116436	0.0138539	0.0126455	0.180182	1
Ier5	ENSMUSG00000056708	468115	GGCACACGGAGGGACGCTGAGGCTG	chr1:155099094-155099118_-	chr1:155097804-155099623_-	-	44269_m6a_chr1:155097804-155099623_-	1.00558	0.957342	0.670525	0.528079	0.924725	0.982871	0.388093	0.550469	0.178765	0.19943	0.499882	0.0277876	0.0354664	0.0311862	0
Ier5	ENSMUSG00000056708	825450	GCGTGTGGCACACGGAGGGACGCTG	chr1:155099088-155099112_-	chr1:155097804-155099623_-	-	44268_m6a_chr1:155097804-155099623_-	0.497342	0.343409	0.613755	-0.00955057	0.982364	1.11655	0.2306	0.289022	-0.539447	0.267489	0.0212979	0.36152	0.192294	0.458667	0
Ier5	ENSMUSG00000056708	289114	CTCCGGGCGTGTGGCACACGGAGGG	chr1:155099082-155099106_-	chr1:155097804-155099623_-	-	44267_m6a_chr1:155097804-155099623_-	0.924893	-0.545475	-0.611074	-0.728936	0.601759	1.2442	0.256915	-1.51733	0.437628	1	1	0.799389	0.45876	0.629403	0
Ier5	ENSMUSG00000056708	549449	TTCCCGCTCCGGGCGTGTGGCACAC	chr1:155099076-155099100_-	chr1:155097804-155099623_-	-	44266_m6a_chr1:155097804-155099623_-	0.0357646	-0.615408	-0.0176134	-0.079501	-0.119467	0.279921	0.256371	0.36711	-1.13723	1	1	0.955492	0.919693	0.595586	0
Ier5	ENSMUSG00000056708	862516	CTGAGCTTCCCGCTCCGGGCGTGTG	chr1:155099070-155099094_-	chr1:155097804-155099623_-	-	44265_m6a_chr1:155097804-155099623_-	-0.114452	0.303711	0.378445	-0.557079	-0.419075	-0.446241	-0.350858	0.370671	0.232145	1	1	0.886151	0.998537	0.318351	0
Ier5	ENSMUSG00000056708	912357	CCGGTTCTGAGCTTCCCGCTCCGGG	chr1:155099064-155099088_-	chr1:155097804-155099623_-	-	44264_m6a_chr1:155097804-155099623_-	0.00191627	0.240123	0.29464	-0.0821389	-0.171882	-0.279853	-0.408246	0.29317	0.157367	1	1	0.953582	0.993122	0.415595	0
Ier5	ENSMUSG00000056708	765340	CGGCCACCGGTTCTGAGCTTCCCGC	chr1:155099058-155099082_-	chr1:155097804-155099623_-	-	44263_m6a_chr1:155097804-155099623_-	0.08311	-0.213037	-0.660025	-0.792573	-0.738637	0.735776	-0.251083	-0.842592	-1.57156	1	1	0.95992	0.813353	0.922092	0
Ier5	ENSMUSG00000056708	741774	CCACCGCGGCCACCGGTTCTGAGCT	chr1:155099052-155099076_-	chr1:155097804-155099623_-	-	44262_m6a_chr1:155097804-155099623_-	0.250278	0.549924	0.377375	-0.344369	0.0586989	0.0776565	0.0137394	0.0787635	0.0421719	1	1	0.720668	0.943453	0.0239791	0
Ier5	ENSMUSG00000056708	190351	ATCCGGCCACCGCGGCCACCGGTTC	chr1:155099046-155099070_-	chr1:155097804-155099623_-	-	44261_m6a_chr1:155097804-155099623_-	0.235433	-0.651966	-1.06575	-0.0273383	0.0796488	0.393425	-0.12104	-1.56974	-1.60364	1	1	0.933794	0.828678	0.918876	0
Ier5	ENSMUSG00000056708	22127	CCCCCGATCCGGCCACCGCGGCCAC	chr1:155099040-155099064_-	chr1:155097804-155099623_-	-	44260_m6a_chr1:155097804-155099623_-	0.0703318	-0.936235	-0.790843	-0.517064	-0.0123174	0.158351	-0.200358	-0.822142	-0.129527	1	1	0.957332	0.915389	0.871819	0
Ier5	ENSMUSG00000056708	604373	GAGCTTCCCCCGATCCGGCCACCGC	chr1:155099034-155099058_-	chr1:155097804-155099623_-	-	44259_m6a_chr1:155097804-155099623_-	-0.0938547	0.133051	0.107372	-0.589728	-0.380103	-0.0440897	-0.271886	-0.00323934	-0.548872	1	1	0.984947	0.971945	0.864141	0
Ier5	ENSMUSG00000056708	536644	CCCGGAGAGCTTCCCCCGATCCGGC	chr1:155099028-155099052_-	chr1:155097804-155099623_-	-	44258_m6a_chr1:155097804-155099623_-	0.541737	-0.306338	0.556447	0.158435	0.0966559	0.518355	0.0790098	-0.163916	-0.175448	1	1	0.712149	0.621349	0.692217	0
Ier5	ENSMUSG00000056708	586230	CTCCGCCCCGGAGAGCTTCCCCCGA	chr1:155099022-155099046_-	chr1:155097804-155099623_-	-	44257_m6a_chr1:155097804-155099623_-	0.266948	-0.530284	-0.0649764	-0.257149	-0.10419	0.211069	-0.254102	-0.696949	-0.841664	1	1	0.932243	0.938105	0.956536	0
Ier5	ENSMUSG00000056708	893611	CCTCCTCTCCGCCCCGGAGAGCTTC	chr1:155099016-155099040_-	chr1:155097804-155099623_-	-	44256_m6a_chr1:155097804-155099623_-	-1.37901	0.0238917	0.0665773	-0.363932	-1.29024	-0.967074	-1.43031	0.0214044	-0.370116	1	1	0.89787	0.975398	0.835533	0
Ier5	ENSMUSG00000056708	826034	CCGAGTCCTCCTCTCCGCCCCGGAG	chr1:155099010-155099034_-	chr1:155097804-155099623_-	-	44255_m6a_chr1:155097804-155099623_-	-0.900523	0.0845333	-0.015523	-0.422879	-0.782943	-0.909567	-0.74044	-0.0759647	-0.0365904	1	1	0.927551	0.989887	0.803313	0
Ier5	ENSMUSG00000056708	187198	CTGCCGCCGAGTCCTCCTCTCCGCC	chr1:155099004-155099028_-	chr1:155097804-155099623_-	-	44254_m6a_chr1:155097804-155099623_-	0.158795	-0.131818	0.285785	-0.0300676	0.254311	0.129916	0.178715	-0.125149	0.203369	1	1	0.946978	0.924026	0.181318	0
Ier5	ENSMUSG00000056708	796459	AAGCAGCTGCCGCCGAGTCCTCCTC	chr1:155098998-155099022_-	chr1:155097804-155099623_-	-	44253_m6a_chr1:155097804-155099623_-	-1.08821	0.309056	0.0209864	-0.47878	-0.726935	-0.679556	-1.01788	0.332676	0.294394	1	1	0.880284	0.996708	0.572759	0
Ier5	ENSMUSG00000056708	18981	GGCCCCAAGCAGCTGCCGCCGAGTC	chr1:155098992-155099016_-	chr1:155097804-155099623_-	-	44252_m6a_chr1:155097804-155099623_-	0.267728	0.214026	-0.123901	0.213556	0.27227	0.533907	0.00181618	-0.73056	-0.361412	1	1	0.943685	0.376238	0.868207	0
Ier5	ENSMUSG00000056708	144238	CCACGCGGCCCCAAGCAGCTGCCGC	chr1:155098986-155099010_-	chr1:155097804-155099623_-	-	44251_m6a_chr1:155097804-155099623_-	0.318302	-0.546176	-1.68086	-0.706144	0.059807	0.442165	0.191691	-1.70956	-0.912618	1	1	0.89969	0.807513	0.851882	0
Ier5	ENSMUSG00000056708	311451	GACGCTCCACGCGGCCCCAAGCAGC	chr1:155098980-155099004_-	chr1:155097804-155099623_-	-	44250_m6a_chr1:155097804-155099623_-	0.433735	-0.216477	-0.165046	-0.31111	0.00393871	0.746006	0.00304291	-0.564837	-0.122958	1	1	0.913911	0.667971	0.807916	0
Ier5	ENSMUSG00000056708	33336	CGCGCGGACGCTCCACGCGGCCCCA	chr1:155098974-155098998_-	chr1:155097804-155099623_-	-	44249_m6a_chr1:155097804-155099623_-	0.413634	-1.22734	-0.0422321	0.0917819	0.302039	0.417351	0.0846483	-0.60995	-0.0111757	1	1	0.864885	0.622109	0.708367	0
Ier5	ENSMUSG00000056708	156660	ACGCCGCGCGCGGACGCTCCACGCG	chr1:155098968-155098992_-	chr1:155097804-155099623_-	-	44248_m6a_chr1:155097804-155099623_-	-0.400691			-1.7402	0.0951187	1.06996	-0.13728	1.84624		1	1	1	0.695873	0.266769	0
Ier5	ENSMUSG00000056708	50912	CTGAAGACGCCGCGCGCGGACGCTC	chr1:155098962-155098986_-	chr1:155097804-155099623_-	-	44247_m6a_chr1:155097804-155099623_-	-0.738152		0.749083		-0.326525	0.950344	-1.21298			1	1	0.672425	0.496224	1	0
Ier5	ENSMUSG00000056708	426519	CACCTCCTGAAGACGCCGCGCGCGG	chr1:155098956-155098980_-	chr1:155097804-155099623_-	-	44246_m6a_chr1:155097804-155099623_-	1.16002	0.649382	0.787588	0.146367	0.524038	1.23365	0.517316	-0.940005	-1.69598	1	1	0.0568446	0.204424	0.794157	0
Ier5	ENSMUSG00000056708	390770	CCGAGCCACCTCCTGAAGACGCCGC	chr1:155098950-155098974_-	chr1:155097804-155099623_-	-	44245_m6a_chr1:155097804-155099623_-	1.00998	1.23121	0.854033	1.53857	0.676493	0.583806	0.619403	0.66664	0.214108	1	1	0.0169649	0.0872831	0.0322279	0
Ier5	ENSMUSG00000056708	253684	ACGCGTCCGAGCCACCTCCTGAAGA	chr1:155098944-155098968_-	chr1:155097804-155099623_-	-	44244_m6a_chr1:155097804-155099623_-	0.959471	1.38554	0.906572	0.949453	0.636348	0.42652	0.0871199	-0.0556877	0.239713	1	1	0.0265884	0.0686826	0.135702	0
Ier5	ENSMUSG00000056708	571597	CGGGGCACGCGTCCGAGCCACCTCC	chr1:155098938-155098962_-	chr1:155097804-155099623_-	-	44243_m6a_chr1:155097804-155099623_-	1.06011	1.16278	0.956374	1.12928	0.722919	0.522711	0.510462	0.0847622	0.432199	1	1	0.00475181	0.0560032	0.0503596	0
Ier5	ENSMUSG00000056708	787882	GCCCCTCGGGGCACGCGTCCGAGCC	chr1:155098932-155098956_-	chr1:155097804-155099623_-	-	44242_m6a_chr1:155097804-155099623_-	0.394689	0.724461	-0.481401	0.198585	-0.045256	-0.259776	-0.379383	0.314642	-0.0681999	1	1	0.713537	0.937916	0.511252	0
Ier5	ENSMUSG00000056708	304823	CCCGGGGCCCCTCGGGGCACGCGTC	chr1:155098926-155098950_-	chr1:155097804-155099623_-	-	44241_m6a_chr1:155097804-155099623_-	0.901907	0.390848	0.51172	0.327614	0.253809	0.680215	0.0512111	1.12299	-1.74925	1	1	0.21849	0.235136	0.564332	0
Ier5	ENSMUSG00000056708	933380	GCACTGCCCGGGGCCCCTCGGGGCA	chr1:155098920-155098944_-	chr1:155097804-155099623_-	-	44240_m6a_chr1:155097804-155099623_-	-0.894126	0.253315	-0.728543	-2.72484	-0.972917	-1.17142	-1.14355	-0.157764	-0.56457	1	1	0.936833	0.96321	0.911046	0
Ier5	ENSMUSG00000056708	189580	GGCGGCGCACTGCCCGGGGCCCCTC	chr1:155098914-155098938_-	chr1:155097804-155099623_-	-	44239_m6a_chr1:155097804-155099623_-	0.0639882	-0.181448	-0.661024	-0.128055	0.10728	-0.0127994	-0.536844	0.274433	-0.165588	1	1	0.960558	0.978315	0.6506	0
Ier5	ENSMUSG00000056708	9209	CGCACGGGCGGCGCACTGCCCGGGG	chr1:155098908-155098932_-	chr1:155097804-155099623_-	-	44238_m6a_chr1:155097804-155099623_-	0.213211	-1.75563	0.245824		0.448231	1.41956	0.37038	-0.256242		1	1	0.84356	0.209155	0.406295	0
Ier5	ENSMUSG00000056708	328707	GACAGCCGCACGGGCGGCGCACTGC	chr1:155098902-155098926_-	chr1:155097804-155099623_-	-	44237_m6a_chr1:155097804-155099623_-	0.804098	0.62716	0.744005	-0.349633	0.54429	0.355377	0.422486	0.899231		1	1	0.0172755	0.650015	0.104643	0
Ier5	ENSMUSG00000056708	93765	CCGGGGGACAGCCGCACGGGCGGCG	chr1:155098896-155098920_-	chr1:155097804-155099623_-	-	44236_m6a_chr1:155097804-155099623_-	0.124294	0.698953	1.34735	0.432605	0.262992	0.640326	-0.197439	-0.0222356	2.26702	1	1	0.261867	0.162757	0.22999	0
Ier5	ENSMUSG00000056708	894934	CCACGGCCGGGGGACAGCCGCACGG	chr1:155098890-155098914_-	chr1:155097804-155099623_-	-	44235_m6a_chr1:155097804-155099623_-	0.106697	-1.10879	0.187999	-0.317329	-0.776945	-0.160264	-0.510519	-3.14465	1.21568	1	1	0.886853	0.97012	0.698439	0
Ier5	ENSMUSG00000056708	158774	GCTCCTCCACGGCCGGGGGACAGCC	chr1:155098884-155098908_-	chr1:155097804-155099623_-	-	44234_m6a_chr1:155097804-155099623_-	0.467048	-0.622296	0.291182	-0.46118	0.13459	0.352368	-0.132558	-0.960139	-0.298708	1	1	0.824626	0.826028	0.882976	0
Ier5	ENSMUSG00000056708	321215	AGGACCGCTCCTCCACGGCCGGGGG	chr1:155098878-155098902_-	chr1:155097804-155099623_-	-	44233_m6a_chr1:155097804-155099623_-	0.841638	0.892358	0.225493	0.598038	0.363482	0.135329	-0.11466	0.237647	-0.40284	1	1	0.224402	0.345715	0.603398	0
Ier5	ENSMUSG00000056708	57602	CCTCGGAGGACCGCTCCTCCACGGC	chr1:155098872-155098896_-	chr1:155097804-155099623_-	-	44232_m6a_chr1:155097804-155099623_-	0.0288145	-0.550698	-0.0576242	-0.558574	0.0829112	-0.123199	-0.2892	-0.650305	-0.313145	1	1	0.965022	0.941676	0.958615	0
Ier5	ENSMUSG00000056708	898772	ACCCGTCCTCGGAGGACCGCTCCTC	chr1:155098866-155098890_-	chr1:155097804-155099623_-	-	44231_m6a_chr1:155097804-155099623_-	-1.12104	0.0436111	-0.355479	-0.517493	-1.47798	-1.42766	-1.29337	-0.391197	-0.358862	1	1	0.943733	0.978199	0.914741	0
Ier5	ENSMUSG00000056708	924475	CGGGGGACCCGTCCTCGGAGGACCG	chr1:155098860-155098884_-	chr1:155097804-155099623_-	-	44230_m6a_chr1:155097804-155099623_-	-0.319699	1.15941	1.04665	-0.0758049	-0.559332	-0.227557	-0.719983	0.277051	0.506908	1	1	0.373456	0.973225	0.444709	0
Ier5	ENSMUSG00000056708	217368	GTGGCGCGGGGGACCCGTCCTCGGA	chr1:155098854-155098878_-	chr1:155097804-155099623_-	-	44229_m6a_chr1:155097804-155099623_-	0.899143	1.07692	0.7311	0.152224	0.828672	0.666293	0.258646	-0.0717334	0.0701304	1	1	0.0229847	0.176448	0.162793	0
Ier5	ENSMUSG00000056708	832143	GGGCGGGTGGCGCGGGGGACCCGTC	chr1:155098848-155098872_-	chr1:155097804-155099623_-	-	44228_m6a_chr1:155097804-155099623_-	-0.776448	0.185384	-0.220356	0.301524	-0.0552324	-0.239843	-0.856361	0.948811	0.293309	1	1	0.939029	0.901229	0.391093	0
Ier5	ENSMUSG00000056708	449286	GACACGGGGCGGGTGGCGCGGGGGA	chr1:155098842-155098866_-	chr1:155097804-155099623_-	-	44227_m6a_chr1:155097804-155099623_-	0.448071	0.620437	0.606079	1.15025	-0.138157	-0.428212	0.356557	0.595711	0.941477	1	1	0.0984203	0.578955	0.0293792	0
Ier5	ENSMUSG00000056708	353882	TCCTGGGACACGGGGCGGGTGGCGC	chr1:155098836-155098860_-	chr1:155097804-155099623_-	-	44226_m6a_chr1:155097804-155099623_-	0.794183	0.858762	1.14901	0.399217	0.613666	0.516634	0.394884	1.21048	0.893213	1	1	0.0238959	0.0401099	0.0334659	0
Ier5	ENSMUSG00000056708	395926	CACGCTTCCTGGGACACGGGGCGGG	chr1:155098830-155098854_-	chr1:155097804-155099623_-	-	44225_m6a_chr1:155097804-155099623_-	1.13584	1.38435	0.957863	1.33678	0.963585	0.60441	0.741501	1.03976	0.709877	1	1	0.0146549	0.0441015	0.00716652	0
Ier5	ENSMUSG00000056708	882805	CTGCGCCACGCTTCCTGGGACACGG	chr1:155098824-155098848_-	chr1:155097804-155099623_-	-	44224_m6a_chr1:155097804-155099623_-	-0.424874	0.217249	0.453242	-0.383299	-1.00196	-0.206072	-1.30143	0.0438518	-0.110116	1	1	0.853553	0.962837	0.785423	0
Ier5	ENSMUSG00000056708	908958	CTCCCGCTGCGCCACGCTTCCTGGG	chr1:155098818-155098842_-	chr1:155097804-155099623_-	-	44223_m6a_chr1:155097804-155099623_-	0.0681834	0.347628	0.193204	0.112189	-0.519243	-0.267601	0.00938901	0.283934	0.187201	1	1	0.954706	0.948919	0.0663511	0
Ier5	ENSMUSG00000056708	194033	CACCCACTCCCGCTGCGCCACGCTT	chr1:155098812-155098836_-	chr1:155097804-155099623_-	-	44222_m6a_chr1:155097804-155099623_-	-0.0477553	-0.699962	-0.382963	-0.534093	-0.127695	-0.0163434	-0.205516	-0.891599	-0.33499	1	1	0.976086	0.961066	0.913982	0
Ier5	ENSMUSG00000056708	550740	GGCCGCCACCCACTCCCGCTGCGCC	chr1:155098806-155098830_-	chr1:155097804-155099623_-	-	44221_m6a_chr1:155097804-155099623_-	0.170717	-0.185004	0.0956218	-0.380719	0.0233471	-0.061553	-0.0216344	-0.503779	-0.295617	1	1	0.970515	0.965541	0.883322	0
Ier5	ENSMUSG00000056708	110128	TCGCGCGGCCGCCACCCACTCCCGC	chr1:155098800-155098824_-	chr1:155097804-155099623_-	-	44220_m6a_chr1:155097804-155099623_-	0.123101	0.35627	0.0200013	0.364282	0.259848	0.0858544	0.213835	0.091238	-0.134393	1	1	0.948812	0.75384	0.225324	0
Ier5	ENSMUSG00000056708	847486	AGCAGCTCGCGCGGCCGCCACCCAC	chr1:155098794-155098818_-	chr1:155097804-155099623_-	-	44219_m6a_chr1:155097804-155099623_-	-1.35599	0.134684	-1.02251	-1.10979	-1.31592	-1.26661	-1.10357	-0.0847448	0.0316312	1	1	0.941432	0.999183	0.781646	0
Ier5	ENSMUSG00000056708	934782	GTGCCGAGCAGCTCGCGCGGCCGCC	chr1:155098788-155098812_-	chr1:155097804-155099623_-	-	44218_m6a_chr1:155097804-155099623_-	-0.485332	-0.11523	-1.37587	-0.936856	-1.73298	-0.300972	-1.49985	-3.34536	-0.386646	1	1	0.951481	0.95553	0.90669	0
Ier5	ENSMUSG00000056708	488559	AGCCGGGTGCCGAGCAGCTCGCGCG	chr1:155098782-155098806_-	chr1:155097804-155099623_-	-	44217_m6a_chr1:155097804-155099623_-	0.74031	0.715762	-0.676398	0.246447	0.42456	1.13675	-0.0256401	-0.301677	-2.15044	1	1	0.639939	0.193619	0.820544	0
Ier5	ENSMUSG00000056708	651653	GGGTAGAGCCGGGTGCCGAGCAGCT	chr1:155098776-155098800_-	chr1:155097804-155099623_-	-	44216_m6a_chr1:155097804-155099623_-	0.704344	2.82739	-0.128109	0.308827	0.454373	1.13878	0.366466	0.166966	-0.611952	1	1	0.259788	0.163271	0.486087	0
Ier5	ENSMUSG00000056708	714232	TGAGAGGGGTAGAGCCGGGTGCCGA	chr1:155098770-155098794_-	chr1:155097804-155099623_-	-	44215_m6a_chr1:155097804-155099623_-	0.575151	0.579579	0.435217	-0.646815	-0.221678	1.01347	-0.234975	-1.07068	-0.023338	1	1	0.122756	0.670839	0.833626	0
Ier5	ENSMUSG00000056708	426379	GCTTCTTGAGAGGGGTAGAGCCGGG	chr1:155098764-155098788_-	chr1:155097804-155099623_-	-	44214_m6a_chr1:155097804-155099623_-	0.90969	2.124	1.01888	0.532702	0.787348	1.18807	0.513714	-3.32348	-1.59947	0.871057	1	0.0733101	0.0541044	0.837014	0
Ier5	ENSMUSG00000056708	795043	GGCGCGGCTTCTTGAGAGGGGTAGA	chr1:155098758-155098782_-	chr1:155097804-155099623_-	-	44213_m6a_chr1:155097804-155099623_-	0.466889	1.41409	1.40361	0.271388	0.530828	0.446951	-0.0887868	0.727089	0.624106	1	1	0.0887971	0.140153	0.107819	0
Ier5	ENSMUSG00000056708	868441	AGTTCCGGCGCGGCTTCTTGAGAGG	chr1:155098752-155098776_-	chr1:155097804-155099623_-	-	44212_m6a_chr1:155097804-155099623_-	-0.262442	0.28826	0.254023	-0.302984	0.0136469	-0.0572681	-0.908029	-0.939065	-0.665723	1	1	0.909523	0.975778	0.994263	0
Ier5	ENSMUSG00000056708	409270	CCTCCGAGTTCCGGCGCGGCTTCTT	chr1:155098746-155098770_-	chr1:155097804-155099623_-	-	44211_m6a_chr1:155097804-155099623_-	1.06501	0.526124	0.708956	0.437261	0.537406	1.02421	0.353012	0.292663	-0.0127504	1	1	0.0929067	0.0919781	0.079486	0
Ier5	ENSMUSG00000056708	853163	GCTGCTCCTCCGAGTTCCGGCGCGG	chr1:155098740-155098764_-	chr1:155097804-155099623_-	-	44210_m6a_chr1:155097804-155099623_-	-1.04966	0.374708	0.655954	-0.260381	-0.96138	-0.505263	-1.06191	0.261767	0.306803	1	1	0.761963	0.974802	0.597723	0
Ier5	ENSMUSG00000056708	120732	TGACTGGCTGCTCCTCCGAGTTCCG	chr1:155098734-155098758_-	chr1:155097804-155099623_-	-	44209_m6a_chr1:155097804-155099623_-	0.440804	0.881517	0.613923	1.2393	0.478931	0.325582	0.397786	0.110741	0.20764	1	1	0.136016	0.156876	0.0408284	0
Ier5	ENSMUSG00000056708	122399	CGCCGGTGACTGGCTGCTCCTCCGA	chr1:155098728-155098752_-	chr1:155097804-155099623_-	-	44208_m6a_chr1:155097804-155099623_-	0.315146	0.0810068	0.48952	1.26054	0.452764	0.357258	0.0179699	0.308927	-0.0942786	1	1	0.842883	0.155189	0.218972	0
Ier5	ENSMUSG00000056708	159783	CGTCCTCGCCGGTGACTGGCTGCTC	chr1:155098722-155098746_-	chr1:155097804-155099623_-	-	44207_m6a_chr1:155097804-155099623_-	1.14182	1.53229	0.919053	1.45722	0.58226	0.868707	0.505147	0.290538	-0.0609553	0.0135067	0.221525	0.0266568	0.0614597	0.114322	0
Ier5	ENSMUSG00000056708	840281	CGGTGTCGTCCTCGCCGGTGACTGG	chr1:155098716-155098740_-	chr1:155097804-155099623_-	-	44206_m6a_chr1:155097804-155099623_-	0.025022	0.954718	0.475739	-0.271677	-0.494994	-0.261355	-0.971157	0.0247091	-0.13082	0.997716	1	0.457689	0.993203	0.795911	0
Ier5	ENSMUSG00000056708	19611	CCTCGTCGGTGTCGTCCTCGCCGGT	chr1:155098710-155098734_-	chr1:155097804-155099623_-	-	44205_m6a_chr1:155097804-155099623_-	0.336297	-0.125772	-0.399812	0.691366	0.654205	1.1009	0.456138	-0.152527	-0.560857	1	0.530571	0.930885	0.0351126	0.556854	0
Ier5	ENSMUSG00000056708	96260	CCATCTCCTCGTCGGTGTCGTCCTC	chr1:155098704-155098728_-	chr1:155097804-155099623_-	-	44204_m6a_chr1:155097804-155099623_-	0.131316	-0.0460168	-0.257083	0.0913771	0.32595	0.374576	0.122056	-0.0977393	-0.0916533	1	1	0.977418	0.65518	0.425131	0
Ier5	ENSMUSG00000056708	559208	CGGTCTCCATCTCCTCGTCGGTGTC	chr1:155098698-155098722_-	chr1:155097804-155099623_-	-	44203_m6a_chr1:155097804-155099623_-	0.645177	0.436984	0.507263	1.22121	0.580054	0.518979	0.57312	0.485979	0.438755	1	1	0.167773	0.085982	0.00266184	0
Ier5	ENSMUSG00000056708	797527	CGTTCCCGGTCTCCATCTCCTCGTC	chr1:155098692-155098716_-	chr1:155097804-155099623_-	-	44202_m6a_chr1:155097804-155099623_-	-0.69662	0.06114	-0.323581	-0.432584	-0.418244	-0.596363	-0.533276	0.0576724	-0.251951	1	1	0.964171	0.997384	0.823319	0
Ier5	ENSMUSG00000056708	273708	TTGCCACGTTCCCGGTCTCCATCTC	chr1:155098686-155098710_-	chr1:155097804-155099623_-	-	44201_m6a_chr1:155097804-155099623_-	0.248539	-0.436679	-0.693383	-0.0105634	-0.262658	0.529541	0.291748	-0.984424	-1.31423	1	1	0.941346	0.776116	0.836762	0
Ier5	ENSMUSG00000056708	167466	TGAGGTTTGCCACGTTCCCGGTCTC	chr1:155098680-155098704_-	chr1:155097804-155099623_-	-	44200_m6a_chr1:155097804-155099623_-	0.437334	-0.0734894	0.0753654	-0.157414	0.356621	0.28676	0.00640742	-0.610769	0.0572784	1	1	0.909651	0.76509	0.714779	0
Ier5	ENSMUSG00000056708	139345	TGCTGATGAGGTTTGCCACGTTCCC	chr1:155098674-155098698_-	chr1:155097804-155099623_-	-	44199_m6a_chr1:155097804-155099623_-	0.369012	-0.397849	0.131529	-0.162103	0.319068	0.650078	0.0631424	0.0846185	0.144866	1	1	0.897012	0.552668	0.0155456	0
Ier5	ENSMUSG00000056708	704033	CGAAGATGCTGATGAGGTTTGCCAC	chr1:155098668-155098692_-	chr1:155097804-155099623_-	-	44198_m6a_chr1:155097804-155099623_-	0.548433	0.928112	1.18546	0.570584	0.222071	0.637296	-0.0901117	0.306762	0.696673	0.958109	1	0.0716941	0.156302	0.135359	0
Ier5	ENSMUSG00000056708	873343	TAGACCCGAAGATGCTGATGAGGTT	chr1:155098662-155098686_-	chr1:155097804-155099623_-	-	44197_m6a_chr1:155097804-155099623_-	1.20436	1.18672	1.90535	-0.401447	0.610842	-0.151507	-0.358485	-0.724892	0.277212	0.00274052	1	0.0268721	0.776011	0.743463	0
Ier5	ENSMUSG00000056708	213238	AGAAGCTAGACCCGAAGATGCTGAT	chr1:155098656-155098680_-	chr1:155097804-155099623_-	-	44196_m6a_chr1:155097804-155099623_-	1.54127	1.15028		0.864149	1.06288	0.904174	0.44731	-0.484903		0.000231313	0.0627449	0.0686132	0.00444359	0.486945	0
Ier5	ENSMUSG00000056708	896754	GTCCCGAGAAGCTAGACCCGAAGAT	chr1:155098650-155098674_-	chr1:155097804-155099623_-	-	44195_m6a_chr1:155097804-155099623_-	1.03287	0.93293	0.0488944	-1.02167	-0.098269	0.500671	-0.641889	-0.943673	-0.441523	0.376883	1	0.278379	0.816036	0.975711	0
Ier5	ENSMUSG00000056708	448075	GTAGGAGTCCCGAGAAGCTAGACCC	chr1:155098644-155098668_-	chr1:155097804-155099623_-	-	44194_m6a_chr1:155097804-155099623_-	1.45266	1.37241	2.0444	1.04385	1.105	0.971373	0.328708	-0.188539	0.0550949	5.16604e-06	0.0432844	0.0156279	0.00137209	0.280878	1
Ier5	ENSMUSG00000056708	414959	TTTTCCGTAGGAGTCCCGAGAAGCT	chr1:155098638-155098662_-	chr1:155097804-155099623_-	-	44193_m6a_chr1:155097804-155099623_-	1.31057	1.18672	1.45142	1.17883	0.532647	1.45002	-0.0874653	0.35253	0.0452133	0.00069505	0.0381246	0.00387705	0.0551992	0.195694	0
Ier5	ENSMUSG00000056708	710579	CGGGGCTTTTCCGTAGGAGTCCCGA	chr1:155098632-155098656_-	chr1:155097804-155099623_-	-	44192_m6a_chr1:155097804-155099623_-	1.16798	1.38281	-0.504588	-0.111927	0.433474	0.702839	-0.0113825	-1.05561	0.785435	0.27497	1	0.368944	0.445555	0.536994	0
Ier5	ENSMUSG00000056708	80849	CGCCTGCGGGGCTTTTCCGTAGGAG	chr1:155098626-155098650_-	chr1:155097804-155099623_-	-	44191_m6a_chr1:155097804-155099623_-	1.20304	0.67027	0.2563	0.646779	1.12139	0.571489	0.00215812	0.0048562	0.199688	0.377575	0.309029	0.223691	0.0549229	0.121989	0
Ier5	ENSMUSG00000056708	299349	CTCGGCCGCCTGCGGGGCTTTTCCG	chr1:155098620-155098644_-	chr1:155097804-155099623_-	-	44190_m6a_chr1:155097804-155099623_-	0.968299	0.973827	0.95876	0.696648	0.594072	1.23849	0.23547	-0.453194	0.353663	1.2292e-05	0.000793972	3.66403e-05	0.057263	0.386098	0
Ier5	ENSMUSG00000056708	11063	CTTCCTCTCGGCCGCCTGCGGGGCT	chr1:155098614-155098638_-	chr1:155097804-155099623_-	-	44189_m6a_chr1:155097804-155099623_-	0.282037	-0.483615	-0.171765	-0.209366	0.303604	0.382347	0.203237	-0.456462	-1.02454	1	1	0.939129	0.742467	0.80588	0
Ier5	ENSMUSG00000056708	772015	CCTCCTCTTCCTCTCGGCCGCCTGC	chr1:155098608-155098632_-	chr1:155097804-155099623_-	-	44188_m6a_chr1:155097804-155099623_-	-0.381654	-0.189464	0.161464	-0.277006	-0.312341	-0.369336	-0.0890066	0.0953518	0.0666605	1	1	0.967165	0.999073	0.195283	0
Ier5	ENSMUSG00000056708	718666	CCTCCGCCTCCTCTTCCTCTCGGCC	chr1:155098602-155098626_-	chr1:155097804-155099623_-	-	44187_m6a_chr1:155097804-155099623_-	-0.355634	0.187873	0.172378	-0.350759	-0.422312	-0.354788	-0.0709579	0.0563515	0.0512136	1	1	0.936309	0.999419	0.175754	0
Ier5	ENSMUSG00000056708	318827	CGCCCTCCTCCGCCTCCTCTTCCTC	chr1:155098596-155098620_-	chr1:155097804-155099623_-	-	44186_m6a_chr1:155097804-155099623_-	0.490417	0.0571872	0.110206	-0.0594513	0.317082	0.34801	0.275001	0.051295	0.112379	1	1	0.885536	0.742018	0.0550672	0
Ier5	ENSMUSG00000056708	480820	CCGGGCCGCCCTCCTCCGCCTCCTC	chr1:155098590-155098614_-	chr1:155097804-155099623_-	-	44185_m6a_chr1:155097804-155099623_-	0.262866	0.161644	0.0989207	0.0984119	0.218044	0.0201662	0.228182	0.00858107	-0.056527	1	1	0.985909	0.96041	0.186559	0
Ier5	ENSMUSG00000056708	215902	CGGCTTCCGGGCCGCCCTCCTCCGC	chr1:155098584-155098608_-	chr1:155097804-155099623_-	-	44184_m6a_chr1:155097804-155099623_-	0.0533929	-0.330203	-0.0624818	-0.0964692	0.15721	-0.00777093	-0.0492682	-0.293693	0.0547508	1	1	0.981004	0.969439	0.684942	0
Ier5	ENSMUSG00000056708	823230	GCTCGGCGGCTTCCGGGCCGCCCTC	chr1:155098578-155098602_-	chr1:155097804-155099623_-	-	44183_m6a_chr1:155097804-155099623_-	-0.727258	-0.233312	-0.53793	-0.900951	-0.878943	-0.819569	-0.531572	-0.641222	-1.16796	1	1	0.988966	0.999785	0.968287	0
Ier5	ENSMUSG00000056708	629510	GCCCCGGCTCGGCGGCTTCCGGGCC	chr1:155098572-155098596_-	chr1:155097804-155099623_-	-	44182_m6a_chr1:155097804-155099623_-	-0.336091	0.00735698	-0.102669	-0.782524	-0.423892	-0.116942	-0.59179	-0.20574	-1.06309	1	1	0.986197	0.96971	0.92835	0
Ier5	ENSMUSG00000056708	354244	AGATCTGCCCCGGCTCGGCGGCTTC	chr1:155098566-155098590_-	chr1:155097804-155099623_-	-	44181_m6a_chr1:155097804-155099623_-	0.618135	-0.182596	-0.190241	-0.101654	0.257244	0.46318	0.0928631	-0.0472157	0.15077	1	1	0.849704	0.693706	0.110298	0
Ier5	ENSMUSG00000056708	382352	CGCAGCAGATCTGCCCCGGCTCGGC	chr1:155098560-155098584_-	chr1:155097804-155099623_-	-	44180_m6a_chr1:155097804-155099623_-	0.467589	-0.115768	0.338285	-0.477161	0.225661	0.204446	0.139356	-0.142015	-0.0904613	1	1	0.832622	0.850031	0.471901	0
Ier5	ENSMUSG00000056708	573992	GCTTGTCGCAGCAGATCTGCCCCGG	chr1:155098554-155098578_-	chr1:155097804-155099623_-	-	44179_m6a_chr1:155097804-155099623_-	0.75897	0.294566	0.624988	-0.280255	0.445805	0.662588	-0.155633	-0.0370552	0.0641493	1	1	0.260342	0.534996	0.527356	0
Ier5	ENSMUSG00000056708	381704	GCACCGGCTTGTCGCAGCAGATCTG	chr1:155098548-155098572_-	chr1:155097804-155099623_-	-	44178_m6a_chr1:155097804-155099623_-	1.61521	1.48118	1.82038	1.54605	1.27418	0.910135	0.710498	0.518306	0.600736	0.0745993	0.875604	0.00342266	0.0181951	0.00365221	0
Ier5	ENSMUSG00000056708	267876	CTCTCAGCACCGGCTTGTCGCAGCA	chr1:155098542-155098566_-	chr1:155097804-155099623_-	-	44177_m6a_chr1:155097804-155099623_-	1.43252	1.56057	1.17894	1.39932	1.18061	0.711468	0.247528	0.488822	0.349563	0.0013876	0.116669	0.0069998	0.0298488	0.0146231	0
Ier5	ENSMUSG00000056708	697414	TCATGTCTCTCAGCACCGGCTTGTC	chr1:155098536-155098560_-	chr1:155097804-155099623_-	-	44176_m6a_chr1:155097804-155099623_-	0.883384	1.46644	1.33854	0.801251	0.58115	0.703881	0.254095	0.0168421	-0.204739	0.000255686	0.389709	0.0240962	0.0127505	0.347526	1
Ier5	ENSMUSG00000056708	642115	AGGGGCTCATGTCTCTCAGCACCGG	chr1:155098530-155098554_-	chr1:155097804-155099623_-	-	44175_m6a_chr1:155097804-155099623_-	0.835366	1.1561	0.200284	0.320882	0.260854	0.636196	-0.200763	0.18198	0.0544752	0.254986	1	0.213522	0.237323	0.350605	0
Ier5	ENSMUSG00000056708	39875	TGCTCCAGGGGCTCATGTCTCTCAG	chr1:155098524-155098548_-	chr1:155097804-155099623_-	-	44174_m6a_chr1:155097804-155099623_-	0.969464	0.532242	0.496536	0.28243	0.762943	0.724244	0.0942958	-0.36262	0.176683	0.45391	0.83635	0.147986	0.102563	0.484457	0
Ier5	ENSMUSG00000056708	933388	TGGCTGTGCTCCAGGGGCTCATGTC	chr1:155098518-155098542_-	chr1:155097804-155099623_-	-	44173_m6a_chr1:155097804-155099623_-	-0.532601	0.524864	0.756751	-0.0659994	-0.802837	-0.336155	-0.641782	0.34425	-0.106408	1	1	0.670265	0.959151	0.616678	0
Ier5	ENSMUSG00000056708	506625	CCACGATGGCTGTGCTCCAGGGGCT	chr1:155098512-155098536_-	chr1:155097804-155099623_-	-	44172_m6a_chr1:155097804-155099623_-	0.886446	0.390202	0.734923	0.130314	0.129379	0.647175	0.231464	0.0806826	0.106718	0.0910733	1	0.138267	0.504195	0.0311674	0
Ier5	ENSMUSG00000056708	253421	AGAAGGCCACGATGGCTGTGCTCCA	chr1:155098506-155098530_-	chr1:155097804-155099623_-	-	44171_m6a_chr1:155097804-155099623_-	1.02337	1.38435	1.00854	0.839617	0.66648	0.774711	0.11939	-0.267281	0.749893	0.000173213	0.186563	0.0153152	0.0060233	0.252682	1
Ier5	ENSMUSG00000056708	580976	GGGCTCAGAAGGCCACGATGGCTGT	chr1:155098500-155098524_-	chr1:155097804-155099623_-	-	44170_m6a_chr1:155097804-155099623_-	1.00799	0.5123	0.881805	-0.4615	0.453323	0.481469	0.170921	1.13957	-1.63386	0.0354356	1	0.0721618	0.658658	0.53034	0
Ier5	ENSMUSG00000056708	785676	TCCCGGGGGCTCAGAAGGCCACGAT	chr1:155098494-155098518_-	chr1:155097804-155099623_-	-	44169_m6a_chr1:155097804-155099623_-	-0.0958798	0.533629	0.707125	-0.0302688	0.076041	0.191721	-0.545209	0.26847	0.0525052	1	1	0.601191	0.963821	0.55319	0
Ier5	ENSMUSG00000056708	876137	CTCGGGTCCCGGGGGCTCAGAAGGC	chr1:155098488-155098512_-	chr1:155097804-155099623_-	-	44168_m6a_chr1:155097804-155099623_-	-0.503071	0.417421	0.458865	-0.0967191	-0.95035	0.137546	-1.24837	0.0555576	-0.031979	1	1	0.797389	0.896251	0.764173	0
Ier5	ENSMUSG00000056708	876655	CAGCCACTCGGGTCCCGGGGGCTCA	chr1:155098482-155098506_-	chr1:155097804-155099623_-	-	44167_m6a_chr1:155097804-155099623_-	0.42972	0.508653	1.25964	0.0290395	-0.284774	0.12956	-0.228389	-0.544784	-0.153379	0.148611	1	0.200521	0.94552	0.923796	0
Ier5	ENSMUSG00000056708	40052	AAGCTCCAGCCACTCGGGTCCCGGG	chr1:155098476-155098500_-	chr1:155097804-155099623_-	-	44166_m6a_chr1:155097804-155099623_-	0.325718	-0.410201	-0.368495	-0.277814	0.105199	0.808275	-0.12101	-1.05608	-0.364733	1	1	0.936461	0.60067	0.88436	0
Ier5	ENSMUSG00000056708	37707	CTGCTCAAGCTCCAGCCACTCGGGT	chr1:155098470-155098494_-	chr1:155097804-155099623_-	-	44165_m6a_chr1:155097804-155099623_-	0.506319	0.244214	0.0630138	-0.206667	0.365086	1.00736	-0.0237669	-1.21851	0.203506	1	1	0.853319	0.416247	0.721578	0
Ier5	ENSMUSG00000056708	812633	CTCCCGCTGCTCAAGCTCCAGCCAC	chr1:155098464-155098488_-	chr1:155097804-155099623_-	-	44164_m6a_chr1:155097804-155099623_-	-1.04008	0.192039	0.37235	-0.387651	-0.586976	-0.895508	-0.5023	0.386674	0.426913	1	1	0.848909	0.987784	0.34315	0
Ier5	ENSMUSG00000056708	400558	CGGGGACTCCCGCTGCTCAAGCTCC	chr1:155098458-155098482_-	chr1:155097804-155099623_-	-	44163_m6a_chr1:155097804-155099623_-	0.62984	0.533854	0.636287	0.00892718	0.394423	0.323652	0.00103182	0.247802	0.160078	1	1	0.0235802	0.673521	0.0686537	0
Ier5	ENSMUSG00000056708	23059	GCACTTCGGGGACTCCCGCTGCTCA	chr1:155098452-155098476_-	chr1:155097804-155099623_-	-	44162_m6a_chr1:155097804-155099623_-	0.726799	0.663033	0.696093	0.983232	0.53686	0.604168	0.591807	0.272976	-0.126285	1	1	0.00286028	0.0504124	0.152419	0
Ier5	ENSMUSG00000056708	698245	CCGGCCGCACTTCGGGGACTCCCGC	chr1:155098446-155098470_-	chr1:155097804-155099623_-	-	44161_m6a_chr1:155097804-155099623_-	-0.0664184	0.269983	-0.0947348	-0.572479	-0.308687	-0.146391	-0.422578	-0.754929	0.0081903	1	1	0.964621	0.982538	0.873889	0
Ier5	ENSMUSG00000056708	382561	GAGGCCCCGGCCGCACTTCGGGGAC	chr1:155098440-155098464_-	chr1:155097804-155099623_-	-	44160_m6a_chr1:155097804-155099623_-	0.161027	-0.0977043	0.115275	-0.540494	0.00788835	0.281106	0.0158267	-0.454623	1.09566	1	1	0.980651	0.875337	0.315985	0
Ier5	ENSMUSG00000056708	405298	CCGGGAGAGGCCCCGGCCGCACTTC	chr1:155098434-155098458_-	chr1:155097804-155099623_-	-	44159_m6a_chr1:155097804-155099623_-	0.107572	-1.61323	-0.309658	-0.534808	0.0516027	-0.0356153	0.158604	-1.19695	-0.755466	1	1	0.911016	0.939715	0.852139	0
Ier5	ENSMUSG00000056708	617767	TCGCGGCCGGGAGAGGCCCCGGCCG	chr1:155098428-155098452_-	chr1:155097804-155099623_-	-	44158_m6a_chr1:155097804-155099623_-	0.351862	-0.232631	0.965193	0.505895	0.468358	0.367616	-0.0493658	0.271461	0.460404	1	1	0.5919	0.0371172	0.108188	0
Ier5	ENSMUSG00000056708	876450	TCGTCCTCGCGGCCGGGAGAGGCCC	chr1:155098422-155098446_-	chr1:155097804-155099623_-	-	44157_m6a_chr1:155097804-155099623_-	-1.20648	0.295727	-0.240182	-0.765664	-1.06435	0.294646	-0.794156	0.448581	-0.959213	1	1	0.901336	0.906824	0.767067	0
Ier5	ENSMUSG00000056708	261201	CTCGGCTCGTCCTCGCGGCCGGGAG	chr1:155098416-155098440_-	chr1:155097804-155099623_-	-	44156_m6a_chr1:155097804-155099623_-	0.689956	1.05557	-0.063467	0.982554	0.296246	0.836179	0.422784	0.2894	-0.653196	0.925206	0.573778	0.387322	0.0974333	0.440304	0
Ier5	ENSMUSG00000056708	276311	TACGGTCTCGGCTCGTCCTCGCGGC	chr1:155098410-155098434_-	chr1:155097804-155099623_-	-	44155_m6a_chr1:155097804-155099623_-	0.433923	0.219517	0.290945	0.233333	0.370302	0.50007	-0.074755	0.0861427	0.0909667	1	1	0.920111	0.247957	0.158419	0
Ier5	ENSMUSG00000056708	80228	AGCGCCTACGGTCTCGGCTCGTCCT	chr1:155098404-155098428_-	chr1:155097804-155099623_-	-	44154_m6a_chr1:155097804-155099623_-	0.522198	0.0228296	0.0682314	0.0603153	0.420313	0.57878	-0.0383964	-0.192077	-0.785054	1	1	0.870299	0.390261	0.841231	0
Ier5	ENSMUSG00000056708	209940	GCGCCCAGCGCCTACGGTCTCGGCT	chr1:155098398-155098422_-	chr1:155097804-155099623_-	-	44153_m6a_chr1:155097804-155099623_-	0.921628	0.0693792	0.812622	0.52234	0.602135	1.09072	0.161026	-0.724653	-0.396237	0.594092	0.338891	0.317686	0.0672655	0.805411	0
Ier5	ENSMUSG00000056708	726054	CCCTACGCGCCCAGCGCCTACGGTC	chr1:155098392-155098416_-	chr1:155097804-155099623_-	-	44152_m6a_chr1:155097804-155099623_-	0.858349	1.51476	0.168167	0.995608	0.886243	0.587187	0.370997	-0.258203	0.198767	0.185253	0.307085	0.208669	0.0255858	0.264471	0
Ier5	ENSMUSG00000056708	247318	AGTCTCCCCTACGCGCCCAGCGCCT	chr1:155098386-155098410_-	chr1:155097804-155099623_-	-	44151_m6a_chr1:155097804-155099623_-	0.639086	0.20272	0.341386	0.0200095	0.181682	0.853595	0.186476	-1.06199	-0.0889462	1	1	0.653026	0.43486	0.733966	0
Ier5	ENSMUSG00000056708	838462	GCAACCAGTCTCCCCTACGCGCCCA	chr1:155098380-155098404_-	chr1:155097804-155099623_-	-	44150_m6a_chr1:155097804-155099623_-	-0.839198	0.14776	-0.863264	-0.766321	-0.725701	-0.989462	-0.964962	-0.335083	-0.400114	1	1	0.949876	0.997395	0.940891	0
Ier5	ENSMUSG00000056708	562800	CCGGCAGCAACCAGTCTCCCCTACG	chr1:155098374-155098398_-	chr1:155097804-155099623_-	-	44149_m6a_chr1:155097804-155099623_-	1.02875	0.326446	0.674331	1.10861	0.341008	0.499148	0.624168	0.203345	0.00933785	1	1	0.192529	0.139041	0.111447	0
Ier5	ENSMUSG00000056708	536901	TGCTGCCCGGCAGCAACCAGTCTCC	chr1:155098368-155098392_-	chr1:155097804-155099623_-	-	44148_m6a_chr1:155097804-155099623_-	0.944312	1.09991	0.897185	-0.053823	0.42231	1.20804	-0.065966	-0.117406	-0.661229	0.387537	1	0.00660654	0.304394	0.83542	0
Ier5	ENSMUSG00000056708	90744	GCGATGTGCTGCCCGGCAGCAACCA	chr1:155098362-155098386_-	chr1:155097804-155099623_-	-	44147_m6a_chr1:155097804-155099623_-	-0.00612537	-0.545475	-0.847934	-0.937727	0.176975	0.67407	0.342023	-1.43678	-0.176654	1	1	0.967596	0.721619	0.729495	0
Ier5	ENSMUSG00000056708	261902	TCTGGGGCGATGTGCTGCCCGGCAG	chr1:155098356-155098380_-	chr1:155097804-155099623_-	-	44146_m6a_chr1:155097804-155099623_-	0.78255	-0.728512	0.631919	0.770877	0.609177	0.488629	0.158272	0.938682	0.460554	1	1	0.656688	0.0300063	0.0668685	0
Ier5	ENSMUSG00000056708	696565	GCCCCTTCTGGGGCGATGTGCTGCC	chr1:155098350-155098374_-	chr1:155097804-155099623_-	-	44145_m6a_chr1:155097804-155099623_-	-0.135953	0.182464	0.303245	-0.580378	-0.542337	0.130824	-0.271516	0.750924	0.223033	1	1	0.93796	0.944612	0.227007	0
Ier5	ENSMUSG00000056708	374700	CGGGCTGCCCCTTCTGGGGCGATGT	chr1:155098344-155098368_-	chr1:155097804-155099623_-	-	44144_m6a_chr1:155097804-155099623_-	0.703001		0.696444	1.3616	0.49307	-0.569888	0.115782	1.13957	0.29787	1	1	0.00422797	0.422501	0.110048	0
Ier5	ENSMUSG00000056708	606109	CCCAGCCGGGCTGCCCCTTCTGGGG	chr1:155098338-155098362_-	chr1:155097804-155099623_-	-	44143_m6a_chr1:155097804-155099623_-	-0.0966481	-0.780108	-0.295483	-1.21939	-0.111401	0.089141	-0.306353	-0.432972	-0.401951	1	1	0.973354	0.890207	0.993924	0
Ier5	ENSMUSG00000056708	265590	CCACGGCCCAGCCGGGCTGCCCCTT	chr1:155098332-155098356_-	chr1:155097804-155099623_-	-	44142_m6a_chr1:155097804-155099623_-	0.290993	-0.373628	-0.102383	0.0840957	0.137723	0.423172	-0.135358	-0.579352	-0.073507	1	1	0.941744	0.757346	0.853173	0
Ier5	ENSMUSG00000056708	774266	CGAGAGCCACGGCCCAGCCGGGCTG	chr1:155098326-155098350_-	chr1:155097804-155099623_-	-	44141_m6a_chr1:155097804-155099623_-	0.4599	-0.665937	0.601305	-0.722735	-0.174039	0.294209	-0.346498		-1.46342	1	1	0.746428	0.88613	0.817857	0
Ier5	ENSMUSG00000056708	477386	GAGACTCGAGAGCCACGGCCCAGCC	chr1:155098320-155098344_-	chr1:155097804-155099623_-	-	44140_m6a_chr1:155097804-155099623_-	0.786162	1.43498	1.0121	0.876428	0.714661	0.414932	0.369271	0.0706467	-0.0291275	1	1	0.0407296	0.0572576	0.14075	0
Ier5	ENSMUSG00000056708	493007	CAGGATGAGACTCGAGAGCCACGGC	chr1:155098314-155098338_-	chr1:155097804-155099623_-	-	44139_m6a_chr1:155097804-155099623_-	0.81569	1.15028	0.280567	0.273888	0.470453	1.31687	0.232628	-0.621566	1.58261	1	1	0.181542	0.177106	0.28353	0
Ier5	ENSMUSG00000056708	877494	AGGTCTCAGGATGAGACTCGAGAGC	chr1:155098308-155098332_-	chr1:155097804-155099623_-	-	44138_m6a_chr1:155097804-155099623_-		2.72293			-0.350659	0.806952	-0.111827	-1.02014	-1.34575	0.00146426	1	1	0.54166	0.916801	0
Ier5	ENSMUSG00000056708	333844	AACTCTAGGTCTCAGGATGAGACTC	chr1:155098302-155098326_-	chr1:155097804-155099623_-	-	44137_m6a_chr1:155097804-155099623_-	0.932453	-0.683232		-0.180119	0.701781	0.0573335	0.800493			1	1	0.622872	0.643153	1	0
Ier5	ENSMUSG00000056708	429479	GCCTCCAACTCTAGGTCTCAGGATG	chr1:155098296-155098320_-	chr1:155097804-155099623_-	-	44136_m6a_chr1:155097804-155099623_-	1.40062	1.34188	1.79014	1.71673	1.43602	0.890991	0.577332	0.381784	0.568904	0.853926	1	0.0086102	0.0249741	0.00666495	0
Ier5	ENSMUSG00000056708	486879	CAATAAGCCTCCAACTCTAGGTCTC	chr1:155098290-155098314_-	chr1:155097804-155099623_-	-	44135_m6a_chr1:155097804-155099623_-	0.66771	0.813203	0.760103	0.128166	0.740538	1.64497	0.263858	-0.383412	-2.18622	1	1	0.01013	0.174775	0.788054	0
Ier5	ENSMUSG00000056708	322641	CTCTTCCAATAAGCCTCCAACTCTA	chr1:155098284-155098308_-	chr1:155097804-155099623_-	-	44134_m6a_chr1:155097804-155099623_-	1.19698	0.98823	1.24126	0.365703	0.903473	1.29836	-0.25759	0.445479	0.249665	1	1	0.00628587	0.0890531	0.236435	0
Ier5	ENSMUSG00000056708	446145	ATCGTCCTCTTCCAATAAGCCTCCA	chr1:155098278-155098302_-	chr1:155097804-155099623_-	-	44133_m6a_chr1:155097804-155099623_-	0.660012	0.0478477	0.632084	0.115557	0.230788	0.566811	0.128023	-0.469062	0.251983	1	1	0.511112	0.49987	0.486917	0
Ier5	ENSMUSG00000056708	280145	CGATCGATCGTCCTCTTCCAATAAG	chr1:155098272-155098296_-	chr1:155097804-155099623_-	-	44132_m6a_chr1:155097804-155099623_-	0.724278	0.971265	1.11914	0.90203	0.976132	1.14551	-0.20945	0.165158	-0.176899	1	1	0.0259863	0.00516375	0.603375	1
Ier5	ENSMUSG00000056708	593055	AGTTAACGATCGATCGTCCTCTTCC	chr1:155098266-155098290_-	chr1:155097804-155099623_-	-	44131_m6a_chr1:155097804-155099623_-	1.03361	1.04894	1.98099	1.48322	1.06431	0.474857	0.496604	0.093316	0.0611572	0.90505	1	0.0512511	0.0690371	0.105198	0
Ier5	ENSMUSG00000056708	95659	TACAAAAGTTAACGATCGATCGTCC	chr1:155098260-155098284_-	chr1:155097804-155099623_-	-	44130_m6a_chr1:155097804-155099623_-	1.47658	0.61604	1.03352		-0.362605	-0.467252		1.38353		1	1	0.0705769	0.976885	1	0
Ier5	ENSMUSG00000056708	93751	CACAGATACAAAAGTTAACGATCGA	chr1:155098254-155098278_-	chr1:155097804-155099623_-	-	44129_m6a_chr1:155097804-155099623_-	-0.738152			-0.180119	-0.797124	-1.2137		0.899231	-0.21104	1	1	1	0.962565	0.308144	0
Ier5	ENSMUSG00000056708	917106	GACACACACAGATACAAAAGTTAAC	chr1:155098248-155098272_-	chr1:155097804-155099623_-	-	44128_m6a_chr1:155097804-155099623_-	0.094334	0.204594	-1.33068	1.10552	-0.151012	-0.85591	-1.88693	0.416422	-0.76047	1	1	0.875829	0.658669	0.800115	0
Ier5	ENSMUSG00000056708	920686	CACACGGACACACACAGATACAAAA	chr1:155098242-155098266_-	chr1:155097804-155099623_-	-	44127_m6a_chr1:155097804-155099623_-	-2.50966	-0.891479	-0.843817	0.248094	-0.766738	-1.05072	-1.20599	0.827352	0.495787	1	1	0.961889	0.91466	0.456952	0
Ier5	ENSMUSG00000056708	296760	AACTTACACACGGACACACACAGAT	chr1:155098236-155098260_-	chr1:155097804-155099623_-	-	44126_m6a_chr1:155097804-155099623_-	-0.939431	-1.44849	-1.37599	0.785031	0.0803293	0.229428	0.0999398	-0.127141	-0.241688	1	1	0.995721	0.402023	0.671106	0
Ier5	ENSMUSG00000056708	372080	AAGACAAACTTACACACGGACACAC	chr1:155098230-155098254_-	chr1:155097804-155099623_-	-	44125_m6a_chr1:155097804-155099623_-	0.170209	-2.40722	-0.381236	0.307476	0.461996	0.129866	-0.327778	0.880566	-2.51624	1	1	0.883624	0.516777	0.700819	0
Ier5	ENSMUSG00000056708	437692	CAACACAAGACAAACTTACACACGG	chr1:155098224-155098248_-	chr1:155097804-155099623_-	-	44124_m6a_chr1:155097804-155099623_-	-2.16471			2.18782	-1.00631	-1.20831		-1.23488	-0.21104	1	1	1	0.598713	0.79572	0
Ier5	ENSMUSG00000056708	48725	CAGTCTCAACACAAGACAAACTTAC	chr1:155098218-155098242_-	chr1:155097804-155099623_-	-	44123_m6a_chr1:155097804-155099623_-			0.422905		0.136307		0.889024			1	1	1	1	1	0
Ier5	ENSMUSG00000056708	257672	ACAGAACAGTCTCAACACAAGACAA	chr1:155098212-155098236_-	chr1:155097804-155099623_-	-	44122_m6a_chr1:155097804-155099623_-	0.388061	0.800735	0.365025		-0.661744	0.340466	-0.222796		1.60797	1	1	0.345547	0.738101	0.285604	0
Ier5	ENSMUSG00000056708	49595	AGAATCACAGAACAGTCTCAACACA	chr1:155098206-155098230_-	chr1:155097804-155099623_-	-	44121_m6a_chr1:155097804-155099623_-	0.094334						0.14822	-0.131251	0.295074	1	1	1	1	0.187016	0
Ier5	ENSMUSG00000056708	188805	CATTCCAGAATCACAGAACAGTCTC	chr1:155098200-155098224_-	chr1:155097804-155099623_-	-	44120_m6a_chr1:155097804-155099623_-	-0.319362	0.578378	-0.338134		0.268801	-1.55794	1.3166			1	1	0.873065	0.756073	1	0
Ier5	ENSMUSG00000056708	267977	GTGGTGCATTCCAGAATCACAGAAC	chr1:155098194-155098218_-	chr1:155097804-155099623_-	-	44119_m6a_chr1:155097804-155099623_-	0.364086	0.343409	1.24328	1.33474	1.21092	-0.160058	0.228255	-0.621566	-0.0659403	1	1	0.287132	0.206602	0.655323	0
Ier5	ENSMUSG00000056708	33000	GAAGGGGTGGTGCATTCCAGAATCA	chr1:155098188-155098212_-	chr1:155097804-155099623_-	-	44118_m6a_chr1:155097804-155099623_-	0.617517	0.0233093	0.0990161	0.341556	1.04982	0.630915	0.209185	0.289022	0.148072	1	1	0.807815	0.106959	0.0124885	0
Ier5	ENSMUSG00000056708	794809	CCCGGGGAAGGGGTGGTGCATTCCA	chr1:155098182-155098206_-	chr1:155097804-155099623_-	-	44117_m6a_chr1:155097804-155099623_-	0.0827099	1.50106	0.823881	0.720187	0.423982	0.176859	-0.519497	-0.176933	-0.0954879	1	1	0.241619	0.238896	0.888013	0
Ier5	ENSMUSG00000056708	736741	TCAAGCCCCGGGGAAGGGGTGGTGC	chr1:155098176-155098200_-	chr1:155097804-155099623_-	-	44116_m6a_chr1:155097804-155099623_-	1.10792	1.74404	1.70228	0.804435	0.892342	0.65218	0.395219	0.73654	0.731001	1	1	0.0176216	0.0104065	0.0140565	0
Ier5	ENSMUSG00000056708	434601	AAAGTCTCAAGCCCCGGGGAAGGGG	chr1:155098170-155098194_-	chr1:155097804-155099623_-	-	44115_m6a_chr1:155097804-155099623_-	0.934489	0.207218	1.34637	0.539427	0.83082	-0.294001	0.0215959	0.0151551	0.434139	0.543457	1	0.18782	0.443289	0.147463	0
Ier5	ENSMUSG00000056708	711355	ACCCCCAAAGTCTCAAGCCCCGGGG	chr1:155098164-155098188_-	chr1:155097804-155099623_-	-	44114_m6a_chr1:155097804-155099623_-	0.799267	1.39976	0.36162	0.336952	0.200458	0.730541	-0.605699	-0.821537	0.228283	0.218798	1	0.157269	0.267071	0.81213	0
Ier5	ENSMUSG00000056708	647845	GTCTGCACCCCCAAAGTCTCAAGCC	chr1:155098158-155098182_-	chr1:155097804-155099623_-	-	44113_m6a_chr1:155097804-155099623_-	0.589211	0.605547	0.551462	0.642821	0.37748	0.132236	0.32787	0.242613	0.0710099	1	1	0.00751573	0.321191	0.0397183	0
Ier5	ENSMUSG00000056708	272236	GTCCCTGTCTGCACCCCCAAAGTCT	chr1:155098152-155098176_-	chr1:155097804-155099623_-	-	44112_m6a_chr1:155097804-155099623_-	0.539005	-0.346239	-0.4226	-0.382354	0.226409	0.462473	0.1855	-0.619621	-0.00252286	1	1	0.885845	0.746947	0.649334	0
Ier5	ENSMUSG00000056708	196575	AGGAAAGTCCCTGTCTGCACCCCCA	chr1:155098146-155098170_-	chr1:155097804-155099623_-	-	44111_m6a_chr1:155097804-155099623_-	0.326748	0.284905	-0.0112263	0.257224	0.343891	0.379314	-0.00698897	-0.142618	-0.0452727	1	1	0.929669	0.299314	0.713985	0
Ier5	ENSMUSG00000056708	771826	TGGCAGAGGAAAGTCCCTGTCTGCA	chr1:155098140-155098164_-	chr1:155097804-155099623_-	-	44110_m6a_chr1:155097804-155099623_-	0.262892	0.736536	1.03103	0.273977	0.269269	1.02116	-0.167082	0.547478	-0.153725	0.148602	0.70608	0.211192	0.23822	0.339038	0
Ier5	ENSMUSG00000056708	728533	TGCTGCTGGCAGAGGAAAGTCCCTG	chr1:155098134-155098158_-	chr1:155097804-155099623_-	-	44109_m6a_chr1:155097804-155099623_-	0.868493	1.22022	1.75935	0.18449	0.306968	0.865122	-0.540208	0.8899	-1.56769	0.000774876	1	0.0426	0.276707	0.671533	0
Ier5	ENSMUSG00000056708	789924	TTTCTGTGCTGCTGGCAGAGGAAAG	chr1:155098128-155098152_-	chr1:155097804-155099623_-	-	44108_m6a_chr1:155097804-155099623_-	1.11152	1.49983	0.935524	1.10431	0.807895	1.18315	0.384049	-0.621566		0.00317857	0.033859	0.024235	0.0118918	0.550739	1
Ier5	ENSMUSG00000056708	433444	CTTCCTTTTCTGTGCTGCTGGCAGA	chr1:155098122-155098146_-	chr1:155097804-155099623_-	-	44107_m6a_chr1:155097804-155099623_-	0.773424	1.00401	-0.282394	0.668288	0.440512	1.24259	0.639863	-0.114652	-0.183728	1	0.527959	0.459578	0.0911291	0.311589	0
Ier5	ENSMUSG00000056708	363213	CTGCAGCTTCCTTTTCTGTGCTGCT	chr1:155098116-155098140_-	chr1:155097804-155099623_-	-	44106_m6a_chr1:155097804-155099623_-	0.647187	-0.607538	0.106343	0.130533	0.196437	0.483698	0.154963	0.00987313	-0.302924	1	1	0.809152	0.608586	0.521191	0
Ier5	ENSMUSG00000056708	566243	GCCTTTCTGCAGCTTCCTTTTCTGT	chr1:155098110-155098134_-	chr1:155097804-155099623_-	-	44105_m6a_chr1:155097804-155099623_-	0.888518	1.65602	1.09929	0.568602	0.426053	0.56238	0.51351	1.04295	0.261324	0.602979	1	0.0398456	0.0219398	0.0538426	1
Ier5	ENSMUSG00000056708	283540	CCTCGAGCCTTTCTGCAGCTTCCTT	chr1:155098104-155098128_-	chr1:155097804-155099623_-	-	44104_m6a_chr1:155097804-155099623_-	1.07745	0.933165	0.802845	0.689551	0.381493	0.892731	0.110257	0.103728	0.44706	0.192591	1	0.0128604	0.0712629	0.0751975	0
Ier5	ENSMUSG00000056708	407293	CCCCTTCCTCGAGCCTTTCTGCAGC	chr1:155098098-155098122_-	chr1:155097804-155099623_-	-	44103_m6a_chr1:155097804-155099623_-	0.977125	0.772842	0.797649	0.627858	0.724454	1.01889	0.343505	0.242166	0.425174	0.823246	1	0.0126882	0.0269251	0.00967994	0
Ier5	ENSMUSG00000056708	653379	GGAACTCCCCTTCCTCGAGCCTTTC	chr1:155098092-155098116_-	chr1:155097804-155099623_-	-	44102_m6a_chr1:155097804-155099623_-	0.74981	1.02596	0.891265	1.22257	0.511875	0.903081	0.470311	0.210775	0.116679	0.491705	0.626287	0.0159174	0.0537881	0.0513898	0
Ier5	ENSMUSG00000056708	729180	GAACGGGGAACTCCCCTTCCTCGAG	chr1:155098086-155098110_-	chr1:155097804-155099623_-	-	44101_m6a_chr1:155097804-155099623_-	0.113485	0.899591	1.04559	0.025397	0.319349	0.217297	-0.184814	0.35507	0.357663	0.989703	1	0.252421	0.84627	0.178757	0
Ier5	ENSMUSG00000056708	812305	AAGATCGAACGGGGAACTCCCCTTC	chr1:155098080-155098104_-	chr1:155097804-155099623_-	-	44100_m6a_chr1:155097804-155099623_-	-0.298608	1.01736	-0.403158	-0.042382	-0.209403	0.244473	-0.759462	-0.315741	0.220445	1	1	0.736869	0.926664	0.762394	0
Ier5	ENSMUSG00000056708	136628	TCCCCCAAGATCGAACGGGGAACTC	chr1:155098074-155098098_-	chr1:155097804-155099623_-	-	44099_m6a_chr1:155097804-155099623_-	1.29761	0.530864	0.903396	1.57581	1.77152	1.28175	0.0975623	0.590081	0.908604	1	0.0113951	0.0873045	0.00647357	0.0684841	0
Ier5	ENSMUSG00000056708	858197	CCTCTCTCCCCCAAGATCGAACGGG	chr1:155098068-155098092_-	chr1:155097804-155099623_-	-	44098_m6a_chr1:155097804-155099623_-	-0.97765	0.637144	0.552135	0.297936	-0.562269	-0.305983	-0.672814	0.416168	0.283944	1	1	0.729043	0.903973	0.451768	0
Ier5	ENSMUSG00000056708	91225	AAAGTCCCTCTCTCCCCCAAGATCG	chr1:155098062-155098086_-	chr1:155097804-155099623_-	-	44097_m6a_chr1:155097804-155099623_-	0.270789	0.0742869	0.372266	0.367564	0.511115	0.453642	0.17691	0.172334	0.313839	1	1	0.932792	0.0393474	0.0153348	0
Ier5	ENSMUSG00000056708	222002	GTGTGTAAAGTCCCTCTCTCCCCCA	chr1:155098056-155098080_-	chr1:155097804-155099623_-	-	44096_m6a_chr1:155097804-155099623_-	0.451687	0.635178	0.489735	1.60406	0.734113	0.595037	0.622285	0.678234	0.293243	1	1	0.161808	0.0832814	0.0208761	0
Ier5	ENSMUSG00000056708	908612	AGAGGTGTGTGTAAAGTCCCTCTCT	chr1:155098050-155098074_-	chr1:155097804-155099623_-	-	44095_m6a_chr1:155097804-155099623_-	-0.652549	0.624457	0.67413	0.879055	-0.299226	0.46091	0.373752	-0.671083	0.528638	1	1	0.680422	0.456517	0.394488	0
Ier5	ENSMUSG00000056708	930688	TGAGAGAGAGGTGTGTGTAAAGTCC	chr1:155098044-155098068_-	chr1:155097804-155099623_-	-	44094_m6a_chr1:155097804-155099623_-	0.0569021				-1.8148	1.76363			1.2606	1	1	1	0.558042	1	0
Ier5	ENSMUSG00000056708	681017	CTTTCATGAGAGAGAGGTGTGTGTA	chr1:155098038-155098062_-	chr1:155097804-155099623_-	-	44093_m6a_chr1:155097804-155099623_-	1.26208			1.67791	0.0356121	-0.587043	0.280746		-0.21104	0.767332	1	1	0.462862	0.408404	0
Ier5	ENSMUSG00000056708	304659	TCGTAGCTTTCATGAGAGAGAGGTG	chr1:155098032-155098056_-	chr1:155097804-155099623_-	-	44092_m6a_chr1:155097804-155099623_-	-0.341251		1.27646	2.72723	0.963601	1.50325	-0.027808			1	0.235087	0.494221	0.0558569	1	0
Ier5	ENSMUSG00000056708	429525	GTGCGGTCGTAGCTTTCATGAGAGA	chr1:155098026-155098050_-	chr1:155097804-155099623_-	-	44091_m6a_chr1:155097804-155099623_-	0.650161	0.431927	1.56308	1.08485	0.495818	-0.466933	0.643694	1.31168		1	1	0.17071	0.447979	0.101132	0
Ier5	ENSMUSG00000056708	296064	GCCCCGGTGCGGTCGTAGCTTTCAT	chr1:155098020-155098044_-	chr1:155097804-155099623_-	-	44090_m6a_chr1:155097804-155099623_-	1.3095	1.23771	1.16512	0.486508	0.907806	0.907373	0.016142	0.135489	-0.177249	0.839765	1	0.00140517	0.0404694	0.388836	1
Ier5	ENSMUSG00000056708	128766	CTCCGCGCCCCGGTGCGGTCGTAGC	chr1:155098014-155098038_-	chr1:155097804-155099623_-	-	44089_m6a_chr1:155097804-155099623_-	0.610983	-0.583725	0.606382	0.0607954	0.654271	0.579128	-0.0839521	-0.144823	0.252358	1	1	0.697515	0.283056	0.373216	0
Ier5	ENSMUSG00000056708	466401	ACGCCACTCCGCGCCCCGGTGCGGT	chr1:155098008-155098032_-	chr1:155097804-155099623_-	-	44088_m6a_chr1:155097804-155099623_-	0.503129	0.142731	0.12668	-0.155355	0.186853	0.471054	-0.37278	-0.121471	-0.328491	1	1	0.873605	0.735607	0.953643	0
Ier5	ENSMUSG00000056708	87439	GAGAAAACGCCACTCCGCGCCCCGG	chr1:155098002-155098026_-	chr1:155097804-155099623_-	-	44087_m6a_chr1:155097804-155099623_-	0.605866	-0.747012	-0.2144	-0.647986	-0.00624882	0.0391079	-0.232	-0.717653	-0.307096	1	1	0.858218	0.92572	0.936206	0
Ier5	ENSMUSG00000056708	50988	TCCTGTGAGAAAACGCCACTCCGCG	chr1:155097996-155098020_-	chr1:155097804-155099623_-	-	44086_m6a_chr1:155097804-155099623_-	0.635208	-0.221681	-0.750861	-0.118972	0.400806	0.75881	-0.178125	0.339814	0.609282	1	1	0.851763	0.441377	0.16499	0
Ier5	ENSMUSG00000056708	497754	AGGAAATCCTGTGAGAAAACGCCAC	chr1:155097990-155098014_-	chr1:155097804-155099623_-	-	44085_m6a_chr1:155097804-155099623_-	0.454897	0.0498475	-1.33218	-0.0494133	0.128577	0.130824	0.0676509	-1.02423	-0.125877	1	1	0.844856	0.970394	0.780805	0
Ier5	ENSMUSG00000056708	339632	AGTCTGAGGAAATCCTGTGAGAAAA	chr1:155097984-155098008_-	chr1:155097804-155099623_-	-	44084_m6a_chr1:155097804-155099623_-	-1.6085		0.00110344	0.864149		-0.521909	0.445594		1.29549	1	1	0.81868	0.560449	0.139269	0
Ier5	ENSMUSG00000056708	10262	CCCTCTAGTCTGAGGAAATCCTGTG	chr1:155097978-155098002_-	chr1:155097804-155099623_-	-	44083_m6a_chr1:155097804-155099623_-	0.639922	-0.714962	-0.2166	1.37495	0.83431	0.515815	0.665093			1	1	0.850546	0.0688205	1	0
Ier5	ENSMUSG00000056708	729824	CGAACTCCCTCTAGTCTGAGGAAAT	chr1:155097972-155097996_-	chr1:155097804-155099623_-	-	44082_m6a_chr1:155097804-155099623_-	0.296091	0.715762	0.679658	-0.317329	0.164678	0.439167	-0.0985179	-0.601279	-0.892755	1	1	0.247824	0.777692	0.916247	0
Ier5	ENSMUSG00000056708	80468	TCCAGACGAACTCCCTCTAGTCTGA	chr1:155097966-155097990_-	chr1:155097804-155099623_-	-	44081_m6a_chr1:155097804-155099623_-	0.977734	-0.335276	1.13766	0.610737	0.965479	0.942955	-0.177342	0.41423	0.785038	1	1	0.395912	0.021473	0.154638	0
Ier5	ENSMUSG00000056708	491980	CTCTACTCCAGACGAACTCCCTCTA	chr1:155097960-155097984_-	chr1:155097804-155099623_-	-	44080_m6a_chr1:155097804-155099623_-	1.09418	-0.870361	0.164561	1.03871	0.809071	1.01373	0.439082	-0.248779	-0.416835	1	1	0.68694	0.0061561	0.550494	0
Ier5	ENSMUSG00000056708	313030	ACAAGTCTCTACTCCAGACGAACTC	chr1:155097954-155097978_-	chr1:155097804-155099623_-	-	44079_m6a_chr1:155097804-155099623_-	0.692356	0.716283	0.679087	-0.227338	0.903557	1.49519	0.193324	-0.983072	-0.187572	1	1	0.00100008	0.24689	0.753218	0
Ier5	ENSMUSG00000056708	814175	AATAATACAAGTCTCTACTCCAGAC	chr1:155097948-155097972_-	chr1:155097804-155099623_-	-	44078_m6a_chr1:155097804-155099623_-	-1.3518	-0.011254	-0.936497	-1.61601	-0.849593		-0.355682	-0.631042	1.14886	1	1	0.954333	0.922231	0.441618	0
Ier5	ENSMUSG00000056708	252428	GAGAAAAATAATACAAGTCTCTACT	chr1:155097942-155097966_-	chr1:155097804-155099623_-	-	44077_m6a_chr1:155097804-155099623_-	0.65589		2.61461	0.249024	-1.56476		1.01443	3.35959		1	1	0.2202	0.759417	0.154389	0
Ier5	ENSMUSG00000056708	200144	GGGAGGGAGAAAAATAATACAAGTC	chr1:155097936-155097960_-	chr1:155097804-155099623_-	-	44076_m6a_chr1:155097804-155099623_-	0.611566	1.18566	0.205659		-0.101522	-0.0721853	-0.498454	0.706252		1	1	0.264463	0.98807	0.426395	0
Ier5	ENSMUSG00000056708	360936	AGGATGGGGAGGGAGAAAAATAATA	chr1:155097930-155097954_-	chr1:155097804-155099623_-	-	44075_m6a_chr1:155097804-155099623_-	0.0674714	0.67027	0.856758	0.135736	-0.433344	-0.191077	0.193911	1.24434	1.04704	1	1	0.386407	0.947381	0.0575134	0
Ier5	ENSMUSG00000056708	572333	AGAGAAAGGATGGGGAGGGAGAAAA	chr1:155097924-155097948_-	chr1:155097804-155099623_-	-	44074_m6a_chr1:155097804-155099623_-	-0.438628	0.508653	0.60904	0.161438	0.0562527	-1.03409	0.108567	1.04095	1.38027	1	1	0.716372	0.864752	0.0731776	0
Ier5	ENSMUSG00000056708	275459	TGTGCCAGAGAAAGGATGGGGAGGG	chr1:155097918-155097942_-	chr1:155097804-155099623_-	-	44073_m6a_chr1:155097804-155099623_-	0.112342	0.997244	0.181762	1.08166	-0.023391	0.0862407	0.305358	0.972059	0.792627	1	1	0.527922	0.423301	0.0336948	0
Ier5	ENSMUSG00000056708	562555	TTCTTCTGTGCCAGAGAAAGGATGG	chr1:155097912-155097936_-	chr1:155097804-155099623_-	-	44072_m6a_chr1:155097804-155099623_-	1.45229				-0.200147	1.65324	0.638123	-1.1297	0.0267821	0.360617	1	1	0.36392	0.57881	0
Ier5	ENSMUSG00000056708	562762	AAGCGCTTCTTCTGTGCCAGAGAAA	chr1:155097906-155097930_-	chr1:155097804-155099623_-	-	44071_m6a_chr1:155097804-155099623_-	0.903664	0.821841	0.804037	0.872865	0.825856	0.500671	0.788727	0.237232		1	1	0.00306085	0.033535	0.14772	1
Ier5	ENSMUSG00000056708	223633	GGGTAGAAGCGCTTCTTCTGTGCCA	chr1:155097900-155097924_-	chr1:155097804-155099623_-	-	44070_m6a_chr1:155097804-155099623_-	1.62922	1.0874	0.885363	1.10197	1.09148	0.632881	0.826002	0.484797	0.199664	1	1	0.0390114	0.0270351	0.0479969	0
Ier5	ENSMUSG00000056708	287451	ATCACAGGGTAGAAGCGCTTCTTCT	chr1:155097894-155097918_-	chr1:155097804-155099623_-	-	44069_m6a_chr1:155097804-155099623_-	0.984489		-0.2166	0.564486	0.879962		0.330521		0.765939	1	1	0.536401	0.114887	0.1132	0
Ier5	ENSMUSG00000056708	64760	AGAGTAATCACAGGGTAGAAGCGCT	chr1:155097888-155097912_-	chr1:155097804-155099623_-	-	44068_m6a_chr1:155097804-155099623_-	-0.200396	0.937753		-0.454788	0.442109	-1.12958			-0.430997	1	1	0.546781	0.86437	1	0
Ier5	ENSMUSG00000056708	514874	TTTCCCAGAGTAATCACAGGGTAGA	chr1:155097882-155097906_-	chr1:155097804-155099623_-	-	44067_m6a_chr1:155097804-155099623_-	-0.12535				0.364002	-1.16817	-0.726657	0.0611174	1.56423	1	1	1	0.737109	0.332674	0
Ier5	ENSMUSG00000056708	180853	TTCTGCTTTCCCAGAGTAATCACAG	chr1:155097876-155097900_-	chr1:155097804-155099623_-	-	44066_m6a_chr1:155097804-155099623_-	0.515137	0.506007	0.601305	1.38447	0.250076	-0.0908731	-0.0789954		1.9283	1	1	0.0507339	0.341887	0.256648	0
Ier5	ENSMUSG00000056708	356243	TTAATGTTCTGCTTTCCCAGAGTAA	chr1:155097870-155097894_-	chr1:155097804-155099623_-	-	44065_m6a_chr1:155097804-155099623_-	0.689184	0.102697	1.14911	-1.08569	-0.0439989	0.557289	0.446375	-0.601279	-0.125877	1	1	0.293607	0.794675	0.564445	0
Ier5	ENSMUSG00000056708	235294	GGTCCCTTAATGTTCTGCTTTCCCA	chr1:155097864-155097888_-	chr1:155097804-155099623_-	-	44064_m6a_chr1:155097804-155099623_-	1.0427	0.700107	1.27528	1.08623	0.906294	1.15837	0.255903	-0.165545	0.0258604	1	1	0.0401855	0.00497269	0.296737	1
Ier5	ENSMUSG00000056708	679027	ATTGAAGGTCCCTTAATGTTCTGCT	chr1:155097858-155097882_-	chr1:155097804-155099623_-	-	44063_m6a_chr1:155097804-155099623_-	1.02529	1.7903	1.82186	-0.771937	0.653519	0.894125	-0.144539	0.997358	-0.302924	1	1	0.0261808	0.531062	0.32161	0
Ier5	ENSMUSG00000056708	835783	TGGGGAATTGAAGGTCCCTTAATGT	chr1:155097852-155097876_-	chr1:155097804-155099623_-	-	44062_m6a_chr1:155097804-155099623_-	-0.402629	0.578378		0.35736	-0.200147	0.950344		1.78455	3.22079	1	1	0.703654	0.431624	0.0876857	0
Ier5	ENSMUSG00000056708	57830	CCCCTGTGGGGAATTGAAGGTCCCT	chr1:155097846-155097870_-	chr1:155097804-155099623_-	-	44061_m6a_chr1:155097804-155099623_-	1.50992	0.579579	1.35623	0.528079	0.868109	1.26131	-0.0154744	-0.0544485	0.391194	1	1	0.0684906	0.0555261	0.207954	0
Ier5	ENSMUSG00000056708	788788	TTTTTTCCCCTGTGGGGAATTGAAG	chr1:155097840-155097864_-	chr1:155097804-155099623_-	-	44060_m6a_chr1:155097804-155099623_-	0.579738		0.066417			0.727791	0.6072	-0.131251		1	1	0.649081	1	0.295731	0
Ier5	ENSMUSG00000056708	130807	CAAGCTTTTTTTCCCCTGTGGGGAA	chr1:155097834-155097858_-	chr1:155097804-155099623_-	-	44059_m6a_chr1:155097804-155099623_-	2.10064		-1.45756		-0.0790454	2.3107	1.73845	1.41665	-0.21104	1	1	0.523464	0.310099	0.116616	0
Ier5	ENSMUSG00000056708	543589	GTTCAGCAAGCTTTTTTTCCCCTGT	chr1:155097828-155097852_-	chr1:155097804-155099623_-	-	44058_m6a_chr1:155097804-155099623_-	0.00265953	0.295727	-0.935237	-3.16285	0.162892	-0.0236837	-0.327778	-1.26342		1	1	0.892482	0.826036	0.823928	0
Ier5	ENSMUSG00000056708	182005	TGTGAAGTTCAGCAAGCTTTTTTTC	chr1:155097822-155097846_-	chr1:155097804-155099623_-	-	44057_m6a_chr1:155097804-155099623_-	1.47658	2.10249	0.00110344		2.64984	-0.160058	0.706038			1	1	0.178283	0.312218	1	0
Ier5	ENSMUSG00000056708	903563	CTCTTCTGTGAAGTTCAGCAAGCTT	chr1:155097816-155097840_-	chr1:155097804-155099623_-	-	44056_m6a_chr1:155097804-155099623_-	2.14087	0.578378	1.30441		-0.362605		-0.17659		0.810619	1	1	0.0939818	1	0.301561	0
Ier5	ENSMUSG00000056708	341565	CTTGAACTCTTCTGTGAAGTTCAGC	chr1:155097810-155097834_-	chr1:155097804-155099623_-	-	44055_m6a_chr1:155097804-155099623_-	-0.154859		2.14084		-1.30903	0.0138497	0.6072			1	1	0.360015	0.806704	1	0
Ier5	ENSMUSG00000056708	496080	TCCAAGCTTGAACTCTTCTGTGAAG	chr1:155097804-155097828_-	chr1:155097804-155099623_-	-	44054_m6a_chr1:155097804-155099623_-		2.38872		1.12395	0.899248	0.0506364		0.706252		0.223301	1	1	0.179038	1	0
		48261	CCGCCGGGAAGCGCCGGCCGCTGCA	chr1:16105344-16105368_+	chr1:16105339-16106346_+	+	622_m6a_chr1:16105339-16106346_+	-0.205766	-1.01749	-2.32493	-0.134442	0.185187	-0.139566	-0.101509	-0.621566		1	1	0.932292	0.808563	0.694839	0
		52684	AACCCACCGCCGGGAAGCGCCGGCC	chr1:16105350-16105374_+	chr1:16105339-16106346_+	+	621_m6a_chr1:16105339-16106346_+	-0.0644231	-1.12501	-2.04532	0.0847453	-0.0636299	0.345588	-0.27738	-1.12807	-0.580906	1	1	0.932683	0.405067	0.904115	0
[truncated: 14,274 more rows]
