# Supplementary material
Source: HighWire-hosted journal article supplement (doi:10.1101/rna.051474.115)
Supplement: TableS3.xlsx [file TableS3.xlsx]

## Sheet: Sheet1
external_gene_name	ensembl_gene_id	location	strand	gene_biotype	probe.num	probe.dist	description
9430020K01Rik	ENSMUSG00000033960	chr18:4634929-4682868	+	protein_coding	3	0	RIKEN cDNA 9430020K01 gene [Source:MGI Symbol;Acc:MGI:2685174]
Ahnak	ENSMUSG00000069833	chr19:8989284-9076919	+	protein_coding	19	844.722	AHNAK nucleoprotein (desmoyokin) [Source:MGI Symbol;Acc:MGI:1316648]
Amotl1	ENSMUSG00000013076	chr9:14541966-14615483	-	protein_coding	1		angiomotin-like 1 [Source:MGI Symbol;Acc:MGI:1922973]
Amotl2	ENSMUSG00000032531	chr9:102716672-102733418	+	protein_coding	4	4207.33	angiomotin-like 2 [Source:MGI Symbol;Acc:MGI:1929286]
Ankrd50	ENSMUSG00000044864	chr3:38449261-38484844	-	protein_coding	1		ankyrin repeat domain 50 [Source:MGI Symbol;Acc:MGI:2139777]
Arhgef40	ENSMUSG00000004562	chr14:51984719-52006251	+	protein_coding	1		Rho guanine nucleotide exchange factor (GEF) 40 [Source:MGI Symbol;Acc:MGI:2685515]
Arl4c	ENSMUSG00000049866	chr1:88673125-88702221	-	protein_coding	26	18.96	ADP-ribosylation factor-like 4C [Source:MGI Symbol;Acc:MGI:2445172]
Armcx4	ENSMUSG00000049804	chrX:134686519-134696757	+	protein_coding	1		armadillo repeat containing, X-linked 4 [Source:MGI Symbol;Acc:MGI:2147887]
Bcor	ENSMUSG00000040363	chrX:12036740-12160355	-	protein_coding	1		BCL6 interacting corepressor [Source:MGI Symbol;Acc:MGI:1918708]
Bod1l	ENSMUSG00000061755	chr5:41787542-41844168	-	protein_coding	1		biorientation of chromosomes in cell division 1-like [Source:MGI Symbol;Acc:MGI:2444804]
Cachd1	ENSMUSG00000028532	chr4:100776675-101029220	+	protein_coding	1		cache domain containing 1 [Source:MGI Symbol;Acc:MGI:2444177]
Ccdc85a	ENSMUSG00000032878	chr11:28385685-28584324	-	protein_coding	4	280	coiled-coil domain containing 85A [Source:MGI Symbol;Acc:MGI:2445069]
Cdcp1	ENSMUSG00000035498	chr9:123170824-123216038	-	protein_coding	1		CUB domain containing protein 1 [Source:MGI Symbol;Acc:MGI:2442010]
Cited2	ENSMUSG00000039910	chr10:17723228-17725673	+	protein_coding	2	312	Cbp/p300-interacting transactivator, with Glu/Asp-rich carboxy-terminal domain, 2 [Source:MGI Symbol;Acc:MGI:1306784]
Colec12	ENSMUSG00000036103	chr18:9707648-9877995	+	protein_coding	1		collectin sub-family member 12 [Source:MGI Symbol;Acc:MGI:2152907]
Cyr61	ENSMUSG00000028195	chr3:145646971-145649985	-	protein_coding	18	23.2941	cysteine rich protein 61 [Source:MGI Symbol;Acc:MGI:88613]
D8Ertd82e	ENSMUSG00000050271	chr8:36094828-36147787	+	protein_coding	1		DNA segment, Chr 8, ERATO Doi 82, expressed [Source:MGI Symbol;Acc:MGI:1196223]
Dtx4	ENSMUSG00000039982	chr19:12466341-12501996	-	protein_coding	2	0	deltex 4 homolog (Drosophila) [Source:MGI Symbol;Acc:MGI:2672905]
Dusp3	ENSMUSG00000003518	chr11:101971143-101987013	-	protein_coding	1		dual specificity phosphatase 3 (vaccinia virus phosphatase VH1-related) [Source:MGI Symbol;Acc:MGI:1919599]
Efnb2	ENSMUSG00000001300	chr8:8617434-8660773	-	protein_coding	2	84	ephrin B2 [Source:MGI Symbol;Acc:MGI:105097]
Fam193b	ENSMUSG00000021495	chr13:55539319-55571120	-	protein_coding	1		family with sequence similarity 193, member B [Source:MGI Symbol;Acc:MGI:2385851]
Fat1	ENSMUSG00000070047	chr8:44935447-45052257	+	protein_coding	2	84	FAT tumor suppressor homolog 1 (Drosophila) [Source:MGI Symbol;Acc:MGI:109168]
Fgfbp1	ENSMUSG00000048373	chr5:43978865-43981762	-	protein_coding	5	0	fibroblast growth factor binding protein 1 [Source:MGI Symbol;Acc:MGI:1096350]
Foxo1	ENSMUSG00000044167	chr3:52268337-52350109	+	protein_coding	1		forkhead box O1 [Source:MGI Symbol;Acc:MGI:1890077]
Furin	ENSMUSG00000030530	chr7:80388585-80405436	-	protein_coding	3	111	furin (paired basic amino acid cleaving enzyme) [Source:MGI Symbol;Acc:MGI:97513]
Gja1	ENSMUSG00000050953	chr10:56377300-56390419	+	protein_coding	1		gap junction protein, alpha 1 [Source:MGI Symbol;Acc:MGI:95713]
Helz	ENSMUSG00000020721	chr11:107547930-107693826	+	protein_coding	1		helicase with zinc finger domain [Source:MGI Symbol;Acc:MGI:1925705]
Ier5	ENSMUSG00000056708	chr1:155096361-155099636	-	protein_coding	1		immediate early response 5 [Source:MGI Symbol;Acc:MGI:1337072]
Igfbp3	ENSMUSG00000020427	chr11:7206086-7213923	-	protein_coding	4	70	insulin-like growth factor binding protein 3 [Source:MGI Symbol;Acc:MGI:96438]
Irak3	ENSMUSG00000020227	chr10:120141648-120202130	-	protein_coding	2	498	interleukin-1 receptor-associated kinase 3 [Source:MGI Symbol;Acc:MGI:1921164]
Irs2	ENSMUSG00000038894	chr8:10986980-11008458	-	protein_coding	15	172.714	insulin receptor substrate 2 [Source:MGI Symbol;Acc:MGI:109334]
Jun	ENSMUSG00000052684	chr4:95049034-95052222	-	protein_coding	1		jun proto-oncogene [Source:MGI Symbol;Acc:MGI:96646]
Lphn2	ENSMUSG00000028184	chr3:148815586-148989316	-	protein_coding	7	7085.33	latrophilin 2 [Source:MGI Symbol;Acc:MGI:2139714]
Lrpap1	ENSMUSG00000029103	chr5:35091490-35105766	-	protein_coding	1		low density lipoprotein receptor-related protein associated protein 1 [Source:MGI Symbol;Acc:MGI:96829]
Lrrfip1	ENSMUSG00000026305	chr1:90998737-91128944	+	protein_coding	2	12	leucine rich repeat (in FLII) interacting protein 1 [Source:MGI Symbol;Acc:MGI:1342770]
Macf1	ENSMUSG00000028649	chr4:123349633-123684360	-	protein_coding	1		microtubule-actin crosslinking factor 1 [Source:MGI Symbol;Acc:MGI:108559]
Mfap3l	ENSMUSG00000031647	chr8:60632827-60676729	+	protein_coding	3	78	microfibrillar-associated protein 3-like [Source:MGI Symbol;Acc:MGI:1918556]
Mrps34	ENSMUSG00000038880	chr17:24895116-24897502	+	protein_coding	5	147	mitochondrial ribosomal protein S34 [Source:MGI Symbol;Acc:MGI:1930188]
Nes	ENSMUSG00000004891	chr3:87971078-87980451	+	protein_coding	8	202.286	nestin [Source:MGI Symbol;Acc:MGI:101784]
Nuak1	ENSMUSG00000020032	chr10:84370905-84440597	-	protein_coding	1		NUAK family, SNF1-like kinase, 1 [Source:MGI Symbol;Acc:MGI:1925226]
Nudt11	ENSMUSG00000073295	chrX:6047453-6055110	+	protein_coding	1		nudix (nucleoside diphosphate linked moiety X)-type motif 11 [Source:MGI Symbol;Acc:MGI:1930957]
Peg10	ENSMUSG00000092035	chr6:4747306-4760517	+	protein_coding	10	252	paternally expressed 10 [Source:MGI Symbol;Acc:MGI:2157785]
Plcl2	ENSMUSG00000038910	chr17:50509547-50688493	+	protein_coding	1		phospholipase C-like 2 [Source:MGI Symbol;Acc:MGI:1352756]
Podxl	ENSMUSG00000025608	chr6:31519488-31563981	-	protein_coding	2	180	podocalyxin-like [Source:MGI Symbol;Acc:MGI:1351317]
Prrg4	ENSMUSG00000027171	chr2:104830741-104849876	-	protein_coding	3	24	proline rich Gla (G-carboxyglutamic acid) 4 (transmembrane) [Source:MGI Symbol;Acc:MGI:2442211]
Prss23	ENSMUSG00000039405	chr7:89507785-89517586	-	protein_coding	2	360	protease, serine 23 [Source:MGI Symbol;Acc:MGI:1923703]
Ptpn14	ENSMUSG00000026604	chr1:189728268-189876695	+	protein_coding	1		protein tyrosine phosphatase, non-receptor type 14 [Source:MGI Symbol;Acc:MGI:102467]
Pxdn	ENSMUSG00000020674	chr12:29938036-30017658	+	protein_coding	1		peroxidasin homolog (Drosophila) [Source:MGI Symbol;Acc:MGI:1916925]
Rad52	ENSMUSG00000030166	chr6:119902698-119922828	+	protein_coding	1		RAD52 homolog (S. cerevisiae) [Source:MGI Symbol;Acc:MGI:101949]
Rdh10	ENSMUSG00000025921	chr1:16105774-16133734	+	protein_coding	1		retinol dehydrogenase 10 (all-trans) [Source:MGI Symbol;Acc:MGI:1924238]
Rgmb	ENSMUSG00000048027	chr17:15806253-15826586	-	protein_coding	2	0	repulsive guidance molecule family member B [Source:MGI Symbol;Acc:MGI:1916049]
Rhob	ENSMUSG00000054364	chr12:8497763-8499985	-	protein_coding	2	0	ras homolog gene family, member B [Source:MGI Symbol;Acc:MGI:107949]
Sema6a	ENSMUSG00000019647	chr18:47235598-47368870	-	protein_coding	3	0	sema domain, transmembrane domain (TM), and cytoplasmic domain, (semaphorin) 6A [Source:MGI Symbol;Acc:MGI:1203727]
Sh3pxd2a	ENSMUSG00000053617	chr19:47260174-47464411	-	protein_coding	1		SH3 and PX domains 2A [Source:MGI Symbol;Acc:MGI:1298393]
Shroom2	ENSMUSG00000045180	chrX:152609509-152769465	-	protein_coding	1		shroom family member 2 [Source:MGI Symbol;Acc:MGI:107194]
Slc22a23	ENSMUSG00000038267	chr13:34179158-34345182	-	protein_coding	1		solute carrier family 22, member 23 [Source:MGI Symbol;Acc:MGI:1920352]
Sox11	ENSMUSG00000063632	chr12:27334264-27342574	-	protein_coding	1		SRY (sex determining region Y)-box 11 [Source:MGI Symbol;Acc:MGI:98359]
Tead3	ENSMUSG00000002249	chr17:28331671-28350805	-	protein_coding	1		TEA domain family member 3 [Source:MGI Symbol;Acc:MGI:109241]
Tmem115	ENSMUSG00000010045	chr9:107533945-107538656	+	protein_coding	1		transmembrane protein 115 [Source:MGI Symbol;Acc:MGI:1930765]
Tnfrsf19	ENSMUSG00000060548	chr14:60963834-61046855	-	protein_coding	1		tumor necrosis factor receptor superfamily, member 19 [Source:MGI Symbol;Acc:MGI:1352474]
Twist1	ENSMUSG00000035799	chr12:33957671-33959817	+	protein_coding	1		twist basic helix-loop-helix transcription factor 1 [Source:MGI Symbol;Acc:MGI:98872]
Wnt6	ENSMUSG00000033227	chr1:74771892-74785322	+	protein_coding	1		wingless-related MMTV integration site 6 [Source:MGI Symbol;Acc:MGI:98960]
Zfhx3	ENSMUSG00000038872	chr8:108703100-108961630	+	protein_coding	2	149901	zinc finger homeobox 3 [Source:MGI Symbol;Acc:MGI:99948]
Zmynd8	ENSMUSG00000039671	chr2:165784152-165899016	-	protein_coding	2	48	zinc finger, MYND-type containing 8 [Source:MGI Symbol;Acc:MGI:1918025]
		chr6:70960460-70961451	+		1
		chr8:10985903-10987074	-		5	28.5
